# Supplementary material
Source: publisher figshare collection journal article supplement (https://gsajournals.figshare.com/articles/dataset/_/14109851)
Supplement: Supplementary file 1 [file 2]

## Sheet: Legend
Dataset S7 (separate file). Differentially Methylated Sites (.xlsx workbook). Genomic sites found to be differentially methylated (padj: < 0.05 & change in meth. > 25%) between two sequential lifestages, or between an individual lifestage and all other lifestages, with the methylKit program. Each row represents a different genomic site (identified by chr: chromosome (Col. B), DMS: bp of methylate…

## Sheet: DiffCpG_1v2_25p
Gene Name	chr	DMS	strand	pvalue	qvalue	meth.diff
structural maintenance of chromosomes protein 4-like	NC_042494.1	114108925	-	3.05277e-13	3.97608e-08	67.5214
putative zinc finger protein 724-like	NC_042494.1	157554806	-	8.30244e-10	3.77077e-05	64.6199
uncharacterized LOC100161080	NC_042494.1	58217729	-	2.94239e-09	9.04615e-05	64.2765
probable 39S ribosomal protein L24, mitochondrial-like	NC_042494.1	2157826	+	1.74556e-08	0.000383329	62.66
N/A	NC_042493.1	29458523	-	9.76264e-10	4.20195e-05	61.7647
uncharacterized LOC100166981	NC_042495.1	85915140	-	5.64521e-09	0.000144794	60.4651
28S ribosomal protein S18c, mitochondrial-like	NC_042494.1	166161034	+	3.06585e-07	0.00290366	59.4958
ultraspiracle	NC_042493.1	78545874	+	6.32674e-09	0.000157696	58.0886
LOC100144776	NC_042493.1	11581377	-	3.20778e-08	0.000599098	58.0556
N/A	NC_042493.1	8634472	+	6.79067e-08	0.000983355	57.8431
uncharacterized LOC100165674	NC_042495.1	1540999	+	2.55466e-07	0.00259145	57.1835
N/A	NC_042493.1	88394513	-	2.62074e-06	0.0119299	57.0968
syntaxin 1A	NC_042495.1	93411205	+	1.01787e-07	0.00133822	56.2209
N/A	NC_042493.1	88849241	+	1.26268e-07	0.00152928	55.6645
uncharacterized LOC100573273	NC_042495.1	95963181	+	4.80565e-08	0.000802099	55.5556
N/A	NC_042493.1	127714986	+	5.09586e-09	0.000137614	55.3191
dynamin-1-like protein-like	NC_042494.1	12926623	+	6.77933e-08	0.000983355	55.2885
uncharacterized LOC100167252	NC_042493.1	82683645	-	3.3135e-07	0.00303744	55.222
syntaxin-18-like	NC_042494.1	129781672	-	1.4254e-07	0.00169553	54.973
glycerol-3-phosphate dehydrogenase, mitochondrial-like	NC_042493.1	125512301	+	9.17192e-08	0.00123844	54.9311
uncharacterized LOC100574890	NC_042494.1	137019741	-	1.21168e-07	0.00149395	54.9231
FYVE, RhoGEF and PH domain-containing protein 6-like	NC_042493.1	1957170	-	1.19428e-06	0.00702603	54.8485
protein rogdi-like	NC_042494.1	85285658	+	5.59639e-10	2.76002e-05	54.6957
LOC103308877	NC_042493.1	41968124	-	1.44478e-09	5.06527e-05	54.2774
N/A	NC_042494.1	76708257	+	2.28871e-10	1.34521e-05	53.9674
LOC107884550	NC_042495.1	102259485	-	1.78786e-07	0.00204161	53.8377
uncharacterized LOC100575182	NC_042495.1	3992245	+	6.17054e-11	4.40395e-06	53.621
protein PIEZO2-like	NC_042493.1	88412849	-	1.40507e-06	0.00781938	53.5868
protein polybromo-1-like	NC_042494.1	90488045	-	5.88921e-08	0.000903266	53.4641
zinc finger protein 91-like	NC_042493.1	29464084	+	3.80061e-08	0.000678129	53.4286
membrane-associated ring finger (C3HC4) 5-like	NC_042495.1	16511401	-	2.2766e-07	0.00239336	53.3784
uncharacterized LOC100575182	NC_042495.1	3992247	+	6.06988e-10	2.88807e-05	52.9487
N/A	NC_042495.1	102323206	-	4.34258e-07	0.00362501	52.8409
c-terminal-binding protein-like	NC_042495.1	76487451	-	2.79594e-08	0.000547777	52.7032
angiomotin-like protein 1-like	NC_042494.1	36373249	-	1.59427e-08	0.000353994	52.682
uncharacterized LOC100160540	NC_042496.1	7641301	+	4.83821e-06	0.0170823	52.6807
LOC100168119	NC_042494.1	127315246	-	1.43589e-07	0.0016979	52.5862
N/A	NC_042494.1	69183941	-	8.76861e-08	0.0012002	52.381
uncharacterized LOC100169531	NC_042495.1	96284132	+	3.41687e-08	0.000626439	52.1569
uncharacterized LOC100574684	NC_042493.1	3239800	+	2.5973e-07	0.00260823	52.0833
lymphocyte-specific helicase-like	NC_042493.1	85940095	-	1.25248e-06	0.00720688	51.9186
uncharacterized LOC100164863	NC_042494.1	55032633	+	5.96351e-07	0.00438137	51.8941
uncharacterized LOC100163438	NC_042494.1	67269956	-	1.50137e-07	0.00176489	51.8182
uncharacterized LOC100573661	NC_042494.1	86239836	+	1.17853e-06	0.00698859	51.6841
arf-GAP with coiled-coil, ANK repeat and PH domain-containing protein 3-like	NC_042493.1	89125865	+	4.3837e-08	0.000748743	51.6043
N/A	NC_042495.1	90580505	-	3.09201e-06	0.0132876	51.4474
uncharacterized LOC100161038	NC_042496.1	38204147	-	1.95598e-06	0.00992079	51.3417
uncharacterized LOC100169471	NC_042495.1	70831130	+	2.11902e-08	0.000445748	51.2292
sodium/potassium-transporting ATPase subunit beta-1-interacting protein-like	NC_042494.1	36031615	-	3.71683e-06	0.014564	51.2179
N/A	NC_042496.1	42029739	+	1.21687e-08	0.000282763	50.9921
transaldolase-like	NC_042496.1	25850341	-	2.95695e-06	0.0130444	50.8815
exocyst complex component 3-like	NC_042493.1	91372154	-	7.84417e-07	0.00531376	50.8772
zinc finger protein 266-like	NC_042493.1	11639499	-	9.66257e-08	0.0012873	50.7937
N/A	NC_042494.1	134768104	-	8.44696e-08	0.00116415	50.6719
uncharacterized LOC100160178	NC_042493.1	57944959	+	1.56697e-09	5.39897e-05	50.67
N/A	NC_042494.1	122789117	-	3.11274e-07	0.00293416	50.6098
longevity assurance factor 1 (lag1)-like	NC_042494.1	92932978	-	2.38395e-06	0.0112892	50.5848
transmembrane protein 63A-like	NC_042493.1	798932	+	6.50854e-07	0.00462993	50.4206
N/A	NC_042495.1	51576548	-	8.55847e-06	0.0229879	50.4167
N/A	NC_042493.1	104174729	-	7.09201e-08	0.00100514	50.3162
LOC107882167	NC_042493.1	111422064	+	1.11891e-07	0.0014242	50.2201
p21-activated protein kinase-interacting protein 1-like	NC_042494.1	152409138	+	8.16992e-07	0.00542411	50.1571
m-phase inducer phosphatase 3-like	NC_042494.1	15250020	+	3.89335e-06	0.0149338	50.1099
LOC103308338	NC_042493.1	7050849	-	2.33907e-09	7.92262e-05	50
nuclear pore complex protein Nup85-like	NC_042494.1	119112365	-	9.50469e-07	0.00603915	50
eukaryotic translation initiation factor 4e 1a-like	NC_042494.1	58382964	-	3.50291e-07	0.00316748	49.8943
kinesin-like protein KIF21A-like	NC_042495.1	79929876	-	3.40821e-06	0.0137952	49.8217
mitogen-activated protein kinase kinase kinase 15-like	NC_042494.1	129466402	+	4.49325e-06	0.0162962	49.7436
SET and MYND domain-containing protein 4-like	NC_042495.1	64430335	-	6.53067e-07	0.00462993	49.5692
laminin subunit alpha-like	NC_042494.1	115008159	+	1.13404e-07	0.00142531	49.4444
N/A	NC_042495.1	75740939	+	4.98699e-06	0.0174229	49.4444
tRNA-splicing ligase RtcB homolog	NC_042496.1	21378306	-	1.13052e-05	0.0275354	49.431
N/A	NC_042493.1	82036135	+	2.89307e-09	9.04615e-05	49.3846
e3 ubiquitin-protein ligase SHPRH-like	NC_042495.1	86075859	+	1.49225e-06	0.00803797	49.3506
LOC107884128	NC_042495.1	21826006	-	1.15153e-06	0.00686923	49.301
N/A	NC_042495.1	71467699	+	6.53351e-07	0.00462993	49.2877
uncharacterized LOC100162345	NC_042493.1	90483880	-	1.96944e-08	0.000419576	49.2848
kinesin heavy chain-like	NC_042493.1	60835704	-	8.34457e-07	0.0054674	49.2424
N/A	NC_042494.1	145430296	-	5.45513e-07	0.00410907	49.1837
LOC100144776	NC_042493.1	11581364	-	1.94627e-06	0.00989666	49.0846
uncharacterized LOC100164676	NC_042493.1	16054681	-	3.52812e-06	0.014056	48.9177
LOC103308338	NC_042493.1	7138289	-	5.42248e-07	0.00410907	48.8346
ankyrin repeat and IBR domain-containing protein 1-like	NC_042494.1	56685750	+	1.77582e-06	0.00921752	48.8095
aurora borealis	NC_042496.1	9194448	-	5.29476e-06	0.0179338	48.7645
ATP-dependent RNA helicase abstrakt-like	NC_042495.1	109054653	+	5.44316e-07	0.00410907	48.7049
uncharacterized LOC100572661	NC_042494.1	122100408	+	1.93802e-07	0.0021421	48.6667
protein polybromo-1-like	NC_042494.1	90488014	-	1.21856e-07	0.00149395	48.6395
LOC115034393	NC_042496.1	4130354	+	1.26813e-05	0.0295987	48.5994
serine/threonine-protein kinase PINK1, mitochondrial-like	NC_042496.1	36765737	-	9.20931e-07	0.0059336	48.5739
transcription factor Dp-1-like	NC_042494.1	160197524	-	8.41487e-06	0.0227244	48.5199
SET and MYND domain-containing protein 4-like	NC_042495.1	64430380	-	3.59896e-07	0.00321586	48.5185
cytoskeleton-associated protein 5-like	NC_042495.1	116111823	+	2.28766e-06	0.0110896	48.505
N/A	NC_042496.1	36932423	+	1.83295e-07	0.00206945	48.4601
N/A	NC_042493.1	41959793	+	1.35435e-06	0.00759975	48.317
# uncharacterized LOC100575208 & uncharacterized LOC100575036	NC_042495.1	43150823	-	8.89538e-06	0.0236283	48.3131
dedicator of cytokinesis protein 1-like	NC_042494.1	166780834	-	1.70297e-05	0.0347973	48.2456
LOC100168776	NC_042494.1	80493458	-	1.6005e-06	0.00852905	48.0636
eukaryotic translation initiation factor 4e 1a-like	NC_042494.1	58382951	-	2.1956e-06	0.010807	48.0556
ankyrin repeat domain-containing protein 50-like	NC_042493.1	18069629	+	3.74303e-06	0.0145809	47.9784
uncharacterized LOC100168266	NC_042495.1	50386657	+	7.43301e-06	0.0214309	47.9167
cullin-2-like	NC_042495.1	109566329	-	7.11229e-06	0.0209632	47.8706
LOC100162510	NC_042495.1	114950887	+	3.26016e-06	0.0136013	47.8061
probable ATP-dependent RNA helicase DDX11-like	NC_042493.1	70336153	+	6.02991e-07	0.00439667	47.7535
N/A	NC_042493.1	103876937	-	3.07666e-08	0.000585554	47.6471
N/A	NC_042494.1	119105684	-	1.29642e-09	4.79766e-05	47.6422
N/A	NC_042493.1	106036753	-	1.82345e-06	0.00934344	47.619
possible pseudogene or miscRNA, No KEGG entry	NC_042495.1	37582372	+	5.57156e-06	0.018545	47.614
protogenin B-like	NC_042494.1	161508645	+	7.83304e-06	0.0218962	47.5758
N/A	NC_042496.1	22134476	-	2.38852e-07	0.00248602	47.5108
uncharacterized LOC100162417	NC_042494.1	56714201	-	9.14128e-06	0.023942	47.488
uncharacterized LOC100161573	NC_042495.1	102821315	-	7.88379e-06	0.0219426	47.4747
serine/threonine-protein kinase RIO1-like	NC_042496.1	21624391	-	6.19643e-06	0.0195005	47.4747
ribosomal protein L13-like	NC_042494.1	19923772	-	5.79602e-09	0.000146616	47.3945
tRNA (adenine-N(1)-)-methyltransferase non-catalytic subunit TRM6-like	NC_042494.1	104894739	+	8.10051e-06	0.0222852	47.3625
mitogen-activated protein kinase kinase kinase 15-like	NC_042495.1	107638412	-	3.26283e-07	0.00300477	47.2838
Down syndrome critical region protein 3 homolog	NC_042493.1	122205566	-	4.2661e-06	0.0159053	47.1037
protein cornichon homolog 4-like	NC_042494.1	38707708	+	5.31057e-06	0.0179569	47.0813
serine/threonine-protein kinase NLK-like	NC_042495.1	106352981	-	1.22961e-05	0.0290451	47.0745
low-density lipoprotein receptor-related protein 2-like	NC_042494.1	27121143	-	1.07171e-07	0.0013898	47.0588
kinesin-like protein KIF21A-like	NC_042495.1	79929894	-	6.32431e-08	0.00094316	47.0588
uncharacterized LOC100166017	NC_042495.1	61395814	+	1.21134e-05	0.0288867	47.0383
protein retinal degeneration B-like	NC_042495.1	97025122	+	4.54023e-06	0.0164072	47.0007
protein lin-52 homolog	NC_042495.1	805884	+	2.94246e-06	0.0130092	46.9697
zinc finger protein 271-like	NC_042494.1	125058455	-	1.87924e-05	0.0369629	46.9347
double-strand-break repair protein rad21 homolog	NC_042496.1	40868307	-	8.99382e-06	0.0237111	46.8676
# cathepsin K-1 & group XV phospholipase A2	NC_042493.1	87279996	+	2.23143e-05	0.0407823	46.7525
N/A	NC_042493.1	68539934	-	1.02829e-05	0.0257831	46.6981
N/A	NC_042495.1	102179239	+	2.39133e-05	0.0423137	46.6752
SET and MYND domain-containing protein 4-like	NC_042495.1	64430394	+	9.64416e-07	0.0060496	46.6667
uncharacterized LOC100164863	NC_042494.1	55032640	+	6.72938e-06	0.020531	46.5611
proton-coupled folate transporter-like	NC_042493.1	125606867	+	8.50481e-07	0.00555418	46.5539
guanine nucleotide-binding protein G(s) subunit alpha-like	NC_042496.1	27185067	-	4.15602e-06	0.0155822	46.5046
uncharacterized LOC100573532	NC_042494.1	66570941	+	1.04145e-06	0.00638409	46.4444
dynamin-1-like protein-like	NC_042493.1	18087855	-	2.98388e-05	0.047627	46.4438
charged multivesicular body protein 4b-like	NC_042494.1	42053198	-	3.0575e-06	0.0132484	46.4385
possible pseudogene or miscRNA, No KEGG entry	NC_042493.1	11460439	-	2.82539e-05	0.0462423	46.4286
N/A	NC_042493.1	34762183	+	4.77736e-06	0.0169805	46.4286
tetratricopeptide repeat protein 30A-like	NC_042496.1	7285512	+	2.36094e-06	0.0112334	46.3027
zinc finger protein ubi-d4-like	NC_042493.1	67218798	+	2.57176e-06	0.0118359	46.2745
LOC100168902	NC_042495.1	111078242	-	2.1682e-06	0.0107509	46.2222
heterogeneous nuclear ribonucleoprotein 27C-like	NC_042496.1	760154	-	4.5931e-07	0.0037312	46.1486
N/A	NC_042494.1	112471947	-	2.6057e-05	0.0444712	46.0771
choline transporter-like protein 1-like	NC_042494.1	93316611	-	3.14951e-07	0.00293905	46.0454
Y+L amino acid transporter 2-like	NC_042493.1	30432131	+	3.48592e-06	0.0139883	46.0222
N/A	NC_042494.1	134768106	-	1.60461e-07	0.00185354	46.0111
DNA-directed RNA polymerase II subunit RPB1-like	NC_042494.1	162237784	+	1.7983e-06	0.00928599	45.975
polyphosphoinositide phosphatase-like	NC_042496.1	29461477	-	7.90101e-07	0.00533418	45.9649
centrosomal protein of 290 kDa-like	NC_042495.1	109328078	+	7.18437e-06	0.0210632	45.8399
uncharacterized LOC100575814	NC_042493.1	84009299	+	1.9664e-05	0.0380039	45.8284
# uncharacterized LOC100167552 & chromatin-remodeling ATPase INO80	NC_042496.1	27654454	+	1.9664e-05	0.0380039	45.8284
uncharacterized LOC100161440	NC_042494.1	152542232	+	8.32533e-07	0.0054674	45.8065
N/A	NC_042493.1	6908636	+	8.0806e-06	0.0222852	45.7939
zinc finger MYM-type protein 1-like	NC_042495.1	50823800	-	4.35677e-07	0.00362501	45.7038
N/A	NC_042493.1	125864130	+	2.25735e-06	0.0110294	45.5717
oxysterol-binding protein-related protein 3-like	NC_042496.1	2705154	-	1.15898e-06	0.00689311	45.5628
uncharacterized LOC100161087	NC_042494.1	108558974	+	3.58071e-06	0.0141695	45.4787
serine/threonine-protein kinase Genghis Khan-like	NC_042493.1	21314458	-	3.01615e-06	0.0131891	45.4596
tyrosine-protein phosphatase Lar-like	NC_042495.1	4870921	+	1.36765e-05	0.0308473	45.4545
SET and MYND domain-containing protein 4-like	NC_042495.1	17662451	+	6.00181e-08	0.000908627	45.3476
N/A	NC_042495.1	69731806	-	3.25618e-06	0.0136013	45.3061
N/A	NC_042493.1	103876964	-	8.12484e-07	0.00541216	45.279
N/A	NC_042493.1	61111941	-	2.03795e-06	0.010207	45.2381
microtubule-actin cross-linking factor 1, isoforms 1/2/3/5-like	NC_042495.1	45127125	+	2.79401e-05	0.0460415	45.1593
N/A	NC_042493.1	102863722	+	1.40318e-09	5.05878e-05	45.1401
histone-lysine N-methyltransferase EHMT1-like	NC_042495.1	88253267	+	2.54595e-06	0.0117989	45.0942
protein crumbs-like	NC_042494.1	26811736	+	1.11448e-06	0.00672856	45.0658
N/A	NC_042493.1	97863281	+	5.9212e-08	0.000903266	45.0186
N/A	NC_042496.1	42256818	-	3.35924e-07	0.00306531	45
mitochondrial Rho GTPase-like	NC_042494.1	71295240	+	3.19722e-06	0.0134228	44.8816
TBC1 domain family member 5-like	NC_042494.1	149440194	+	3.05735e-06	0.0132484	44.8718
N/A	NC_042493.1	8634488	+	2.64817e-05	0.0446864	44.87
hrp65 protein-like	NC_042496.1	23906607	+	1.64197e-05	0.0341799	44.835
endoribonuclease dcr-1-like	NC_042495.1	65514085	+	1.99731e-05	0.0384155	44.7065
possible pseudogene or miscRNA, No KEGG entry	NC_042493.1	29817583	+	1.14366e-06	0.00684268	44.686
protein brunelleschi-like	NC_042496.1	9291198	+	4.44465e-06	0.0162546	44.6676
epidermal growth factor receptor kinase substrate 8-like	NC_042493.1	47924084	-	2.30528e-06	0.0111008	44.6667
N/A	NC_042493.1	93737781	+	3.5403e-10	1.91212e-05	44.6429
DNA ligase 1-like	NC_042495.1	103415389	-	1.69614e-05	0.0346931	44.6154
cyclin-dependent kinase 11B-like	NC_042494.1	110782326	-	1.05456e-05	0.0262442	44.5652
LOC107885578	NC_042493.1	106958864	-	2.48202e-08	0.000496	44.5565
N/A	NC_042493.1	42756594	+	4.09318e-07	0.00348073	44.5548
N/A	NC_042493.1	3091582	+	6.30597e-07	0.00453298	44.5455
putative E3 ubiquitin-protein ligase UBR7-like	NC_042494.1	157857496	+	8.31443e-06	0.0224836	44.5013
LOC107885074	NC_042495.1	28090086	+	6.50364e-06	0.0199653	44.4728
N/A	NW_021771112.1	8772	-	2.98607e-06	0.0131149	44.4578
N/A	NC_042494.1	160451061	+	1.81792e-05	0.0363056	44.4334
F-box only protein 5	NC_042494.1	46780680	-	9.62879e-07	0.0060496	44.4225
protein shifted-like	NC_042495.1	74517979	-	3.91333e-06	0.0149456	44.414
LOC103311504	NC_042493.1	109693131	-	2.31033e-11	2.14903e-06	44.3101
N/A	NW_021771981.1	14033	+	9.47819e-06	0.0242833	44.2513
mitochondrial uncoupling protein 4-like	NC_042494.1	58178337	+	7.47603e-07	0.00513675	44.2308
abnormal spindle-like microcephaly-associated protein homolog	NC_042494.1	23650630	-	2.29741e-06	0.0110896	44.186
dedicator of cytokinesis protein 1-like	NC_042494.1	166769297	-	8.93823e-06	0.0236311	44.1627
uncharacterized LOC100574823	NC_042493.1	66471286	+	4.95406e-06	0.0173965	44.1523
g2/M phase-specific E3 ubiquitin-protein ligase-like	NC_042493.1	131977491	+	3.21559e-05	0.0496213	44.0492
cytoskeleton-associated protein 5-like	NC_042495.1	116109352	+	4.81852e-06	0.0170429	44
uncharacterized LOC100161455	NC_042496.1	30323988	+	1.58204e-05	0.0334083	43.9521
LOC103311504	NC_042493.1	109693175	+	3.18345e-13	3.97608e-08	43.934
uncharacterized LOC100159036	NC_042496.1	37001897	+	4.78391e-06	0.0169805	43.815
tyrosine-protein phosphatase 99A-like	NC_042493.1	47948368	-	7.60327e-06	0.0215401	43.8104
MAP kinase-interacting serine/threonine-protein kinase 1-like	NC_042495.1	71544859	+	1.30113e-06	0.00740784	43.6636
protein piwi-like	NC_042493.1	57319915	-	3.99582e-09	0.000114073	43.6452
acetyl-CoA carboxylase-like	NC_042493.1	29602474	+	7.3759e-06	0.0213621	43.6364
N/A	NC_042496.1	9577400	+	6.51398e-06	0.0199653	43.6355
SET and MYND domain-containing protein 4-like	NC_042495.1	64430395	-	2.55064e-06	0.0117989	43.6059
probable saccharopine dehydrogenase-like	NC_042493.1	82772124	-	1.813e-06	0.00933775	43.5724
peptidyl-prolyl cis-trans isomerase-like	NC_042494.1	126282313	+	2.70724e-05	0.0451593	43.5484
protein polybromo-1-like	NC_042494.1	90493020	+	2.21663e-07	0.00234373	43.536
leucine-rich repeat and calponin homology domain-containing protein 3-like	NC_042493.1	90639460	+	2.73287e-05	0.0454186	43.5288
TBC1 domain family member 20-like	NC_042493.1	1942794	-	1.51818e-05	0.032547	43.4921
zinc finger protein 25-like	NC_042493.1	83520725	+	1.11505e-05	0.0272406	43.4216
N/A	NC_042493.1	93720663	-	1.49591e-05	0.0324228	43.4077
suppressor of hairless protein-like	NC_042496.1	14413258	-	2.60494e-05	0.0444712	43.3771
N/A	NW_021770784.1	29971	-	4.97707e-10	2.55027e-05	43.3613
e3 ubiquitin-protein ligase RNF19A-like	NC_042495.1	67810637	+	3.64769e-06	0.0143776	43.3333
cathepsin L (EC:3.4.22.15)	NC_042496.1	40312681	-	3.30243e-06	0.0136635	43.3333
far upstream element-binding protein 1-like	NC_042495.1	86391168	+	2.70433e-05	0.0451593	43.254
LOC100163919	NC_042493.1	27548693	+	1.93843e-05	0.037659	43.2186
pre-mRNA-processing factor 39-like	NC_042494.1	130408942	-	2.73232e-07	0.00267944	43.2104
N/A	NC_042495.1	53323990	-	1.32861e-05	0.0304478	43.1818
reticulon-4-interacting protein 1 homolog, mitochondrial-like	NC_042495.1	86049621	+	2.292e-06	0.0110896	43.0643
putative nuclease HARBI1-like	NW_021770472.1	10533	-	6.8196e-06	0.0206487	43.0108
LOC100166085	NC_042494.1	91098821	-	1.89755e-05	0.0372045	42.9744
uncharacterized LOC100162845	NC_042495.1	53306227	+	7.84943e-06	0.0218962	42.9739
N/A	NC_042493.1	125864143	+	2.83257e-05	0.0463219	42.9167
N/A	NC_042495.1	41805243	+	2.11521e-05	0.0395666	42.8862
uncharacterized LOC100574679	NC_042495.1	22972608	+	1.53222e-06	0.00820899	42.8824
splicing factor 3B subunit 3-like	NC_042494.1	45210624	-	1.95666e-05	0.0378889	42.8755
general transcription factor 3C polypeptide 1-like	NC_042495.1	110865525	+	1.41114e-05	0.0312722	42.8571
MAGUK p55 subfamily member 6-like	NC_042493.1	48036511	-	1.12066e-05	0.0273443	42.8279
synaptic vesicle glycoprotein 2B-like	NC_042494.1	92086629	+	6.90927e-06	0.0207629	42.6897
e3 SUMO-protein ligase PIAS3-like	NC_042495.1	797340	+	1.31526e-06	0.007467	42.674
zinc finger protein 184-like	NC_042493.1	71533286	+	2.16282e-05	0.0398719	42.6599
N/A	NC_042493.1	114075404	+	3.06287e-06	0.0132484	42.5974
putative nuclease HARBI1-like	NC_042494.1	53710920	-	3.16541e-06	0.0133735	42.5926
LOC103307712	NC_042495.1	17731274	+	2.92885e-05	0.0471631	42.5714
cellular tumor antigen p53-like	NC_042493.1	34736434	-	9.38978e-06	0.0241808	42.517
N/A	NC_042493.1	16115053	+	4.70319e-06	0.0168436	42.509
LOC100158926	NC_042495.1	71984251	+	2.82089e-05	0.0462066	42.4819
mevalonate kinase-like	NC_042494.1	89883688	-	2.97571e-05	0.0475726	42.4545
uncharacterized LOC100574679	NC_042495.1	22972645	+	2.96824e-06	0.0130653	42.4468
uncharacterized LOC100167304	NC_042493.1	82793109	+	1.41864e-05	0.0313257	42.402
N/A	NC_042493.1	108612127	-	1.08894e-06	0.00661433	42.392
RNA-binding protein MEX3B-like	NC_042494.1	129673203	+	3.13808e-05	0.0489544	42.3598
longitudinals lacking protein, isoforms A/B/D/L-like	NC_042495.1	101941352	+	3.77077e-06	0.0146319	42.3503
mitogen-activated protein kinase kinase kinase 13-A-like	NC_042494.1	160330602	-	1.40863e-06	0.00781938	42.3451
epidermal growth factor receptor kinase substrate 8-like	NC_042493.1	47924052	-	5.5716e-07	0.00415453	42.3077
N/A	NC_042494.1	18944623	-	5.90847e-06	0.0191057	42.3077
MAP kinase-interacting serine/threonine-protein kinase 1-like	NC_042495.1	71544975	+	5.17653e-06	0.0177134	42.3077
anaphase-promoting complex subunit 1-like	NC_042494.1	133568283	-	2.25147e-05	0.0408655	42.306
proto-oncogene tyrosine-protein kinase ROS-like	NC_042495.1	65455988	+	2.16999e-06	0.0107509	42.2477
bipolar kinesin KRP-130-like	NC_042494.1	105480400	-	2.91284e-05	0.0470569	42.2436
N/A	NC_042495.1	24115319	+	7.94034e-06	0.0220214	42.2153
importin-13-like	NC_042495.1	68694248	-	2.56429e-05	0.044138	42.2085
nuclear RNA export factor 1-like	NC_042494.1	167577118	+	3.18435e-05	0.0493297	42.1997
RING finger and SPRY domain-containing protein 1	NC_042495.1	71909136	+	3.66596e-06	0.0143928	42.1739
ATP-binding cassette sub-family F member 1-like	NC_042494.1	96657966	+	2.13533e-05	0.0396074	42.1569
peroxisomal biogenesis factor 3-like	NC_042495.1	101506568	-	2.56023e-06	0.0118159	42.1411
N/A	NC_042493.1	76460681	-	2.59369e-05	0.0444296	42.1262
N/A	NC_042496.1	19887785	-	3.41019e-06	0.0137952	42.1053
LOC115033248	NC_042493.1	127725878	+	1.28034e-07	0.00154132	42.029
microtubule-actin cross-linking factor 1, isoforms 1/2/3/5-like	NC_042495.1	45126999	+	9.65934e-06	0.0245898	41.9691
kinase suppressor of Ras 2-like	NC_042495.1	76834472	+	9.20939e-06	0.0240259	41.9637
LOC115033925	NC_042494.1	169407992	+	2.75648e-06	0.0123786	41.9444
uncharacterized LOC100169154	NC_042495.1	89604493	-	1.32167e-05	0.0303586	41.9384
deoxynucleotidyltransferase terminal-interacting protein 1-like	NC_042495.1	117535886	-	3.61711e-06	0.0142853	41.9304
uncharacterized LOC100163203	NC_042493.1	82713564	+	1.19081e-06	0.00702603	41.9048
lisH domain and HEAT repeat-containing protein KIAA1468-like	NC_042495.1	103828992	-	2.41469e-06	0.0113282	41.9031
uncharacterized LOC100571833	NC_042493.1	122157368	-	2.71083e-07	0.00267944	41.8623
uncharacterized LOC100575168	NC_042493.1	34759586	+	5.60515e-06	0.018545	41.8297
focal adhesion kinase 1-like	NC_042495.1	45048464	-	2.00359e-05	0.0384792	41.8182
uncharacterized LOC100572014	NC_042495.1	87933847	-	2.96454e-05	0.0475081	41.7464
N/A	NC_042495.1	32562530	+	5.71117e-06	0.0187099	41.7417
uncharacterized LOC100570440	NC_042493.1	72461833	+	2.34391e-06	0.0112203	41.7414
LOC103307766	NC_042495.1	63197485	+	1.32713e-08	0.000298972	41.6978
heparin sulfate O-sulfotransferase-like	NC_042493.1	15240686	+	7.19894e-06	0.0210632	41.6667
N/A	NC_042494.1	170065742	+	4.79642e-06	0.0169948	41.6667
N/A	NC_042493.1	103876915	-	2.92696e-06	0.0129693	41.6268
LOC115035000	NW_021771981.1	9018	+	8.28441e-07	0.00546382	41.5966
sniffer	NC_042494.1	169529102	-	2.41856e-05	0.0425083	41.5584
asparaginyl-tRNA synthetase, cytoplasmic-like	NC_042494.1	94663015	-	9.57223e-06	0.0244615	41.4781
N/A	NC_042494.1	64665737	+	1.65923e-05	0.034314	41.4136
e3 ubiquitin-protein ligase RNF19A-like	NC_042495.1	67810649	+	7.10736e-06	0.0209632	41.4103
uncharacterized LOC100169531	NC_042495.1	96284197	+	6.98894e-06	0.0209064	41.3834
protein son of sevenless-like	NC_042493.1	76677426	+	2.05434e-05	0.0389479	41.3316
LOC107885259	NW_021771981.1	24107	+	5.58538e-06	0.018545	41.313
N/A	NC_042494.1	100842074	-	4.22762e-06	0.0157914	41.2932
N/A	NC_042493.1	108614680	-	5.79496e-07	0.00427325	41.2281
spectrin beta chain-like	NC_042494.1	111659873	+	3.96643e-07	0.00340223	41.2281
uncharacterized LOC100161833	NC_042494.1	43987416	+	1.86676e-05	0.0368625	41.2037
RNA polymerase I-specific transcription initiation factor RRN3-like	NC_042494.1	85066690	+	6.76674e-06	0.0206135	41.1688
SET and MYND domain-containing protein 4-like	NC_042495.1	17664201	-	4.44926e-06	0.0162546	41.1429
LOC103307712	NC_042495.1	17758314	+	4.13858e-06	0.0155459	41.1075
LOC107882535	NC_042493.1	126085978	-	1.35766e-06	0.00759975	41.0989
LOC103310131	NC_042495.1	3828271	-	1.53195e-05	0.0327424	41.078
kinase suppressor of Ras 2-like	NC_042495.1	76834492	+	2.78578e-05	0.0459706	40.9964
serine protease nudel-like	NC_042494.1	4756039	-	3.0388e-06	0.0132302	40.9809
N/A	NC_042495.1	18081259	+	5.39431e-07	0.00410907	40.9731
tyrosine-protein phosphatase 10D-like	NC_042493.1	80351524	-	1.91774e-05	0.0373889	40.9262
uncharacterized LOC100161826	NC_042495.1	76576247	+	7.65936e-06	0.0215581	40.9091
LOC107882661	NC_042493.1	116346645	-	7.43103e-06	0.0214309	40.8441
pre-mRNA-processing-splicing factor 8-like	NC_042495.1	115636188	-	1.21954e-05	0.0289339	40.7005
kelch domain-containing protein 4-like	NC_042494.1	85794124	-	2.49976e-05	0.0434388	40.6977
LOC100164040	NC_042495.1	116094653	+	2.04581e-05	0.0388812	40.6977
N/A	NC_042493.1	119489940	+	3.8854e-06	0.0149338	40.6952
uncharacterized LOC100574613	NC_042493.1	34902986	+	4.38045e-06	0.0161328	40.6926
# KAT8 regulatory NSL complex subunit 3 & uncharacterized LOC100573930	NC_042494.1	12032846	+	4.35721e-06	0.0160949	40.625
cytoskeleton-associated protein 5-like	NC_042495.1	116112421	-	1.07797e-07	0.0013898	40.5903
LOC103309923	NC_042494.1	169494962	+	1.01407e-05	0.0255541	40.4558
uncharacterized LOC100166603	NC_042495.1	37108977	-	1.8545e-05	0.0367657	40.4255
PHD finger protein 14-like	NC_042493.1	125720334	+	1.26934e-05	0.0295987	40.4167
uncharacterized LOC100572761	NC_042493.1	16650753	+	1.315e-05	0.0303137	40.3774
N/A	NC_042494.1	119105732	-	4.98111e-08	0.00081076	40.3422
uncharacterized LOC100161066	NC_042494.1	157426122	-	1.4314e-06	0.00785842	40.3409
LOC103311511	NC_042493.1	109682077	+	9.49008e-07	0.00603915	40.2727
N/A	NW_021766912.1	280	+	3.07351e-05	0.0484006	40.2711
uncharacterized LOC100575183	NC_042495.1	40983529	-	2.43358e-06	0.0113626	40.2256
putative pre-mRNA-splicing factor ATP-dependent RNA helicase DHX16-like	NC_042493.1	47814491	-	2.65545e-05	0.0447435	40.0306
uncharacterized protein KIAA1109-like	NC_042494.1	117632186	+	2.17867e-05	0.0400902	40.0177
1,4-alpha-glucan-branching enzyme-like	NC_042493.1	65689021	+	1.39464e-05	0.0310704	40.0103
N/A	NW_021771065.1	73222	+	4.45895e-06	0.0162603	39.9351
uncharacterized LOC100162345	NC_042493.1	90483866	-	5.15649e-06	0.0177134	39.9284
inner nuclear membrane protein Man1-like	NC_042496.1	17163815	+	9.19072e-06	0.0240085	39.8478
# LOC103307712 & LOC107883430 & LOC107883432	NC_042495.1	17716754	+	1.50363e-05	0.0324501	39.8138
uncharacterized LOC100160811	NC_042494.1	152716381	-	5.78738e-06	0.0188955	39.7643
SET and MYND domain-containing protein 4-like	NC_042495.1	17663774	+	4.75598e-08	0.000802099	39.75
LOC100166853	NC_042494.1	4560157	+	3.16204e-07	0.00293905	39.7335
transmembrane protein 165-like	NC_042494.1	64574954	+	2.75761e-05	0.0456943	39.6735
protein brunelleschi-like	NC_042496.1	9292035	+	1.23928e-06	0.00715767	39.6718
LOC107884939	NC_042493.1	42668328	-	1.33151e-08	0.000298972	39.6354
nucleotide exchange factor SIL1-like	NC_042496.1	22876802	-	1.51417e-05	0.032547	39.6075
N/A	NC_042493.1	93548406	-	4.30339e-06	0.0160038	39.5906
uncharacterized LOC100570073	NC_042494.1	28496096	+	1.57764e-05	0.033362	39.5827
fatty acid synthase-like	NC_042494.1	66985815	-	6.50061e-06	0.0199653	39.5022
protein phosphatase 1 regulatory subunit 12C-like	NC_042494.1	45568564	+	1.98329e-07	0.00217767	39.4737
2-hydroxyacyl-CoA lyase 1-like	NC_042494.1	128452919	-	1.75913e-05	0.035581	39.4242
ras association domain-containing protein 4-like	NC_042494.1	133767023	+	9.32832e-06	0.024147	39.3939
aminopeptidase N-like	NC_042496.1	2391428	-	1.69274e-05	0.034659	39.3571
probable cleavage and polyadenylation specificity factor subunit 2-like	NC_042495.1	16747035	-	2.05617e-05	0.0389479	39.3547
RNA-binding protein 40-like	NC_042495.1	38635424	+	6.63588e-07	0.00465654	39.3314
LOC100164040	NC_042495.1	116073216	+	1.37919e-05	0.0310027	39.3275
uncharacterized LOC100161066	NC_042494.1	157425904	-	1.81912e-07	0.0020655	39.277
uncharacterized LOC100575556	NC_042493.1	101473445	+	5.7016e-08	0.000890151	39.2573
glycerol kinase-like	NC_042493.1	122116238	-	2.17637e-05	0.0400848	39.2477
protein crumbs-like	NC_042494.1	26812773	+	2.23156e-05	0.0407823	39.1414
interferon-inducible double stranded RNA-dependent protein kinase activator A-like	NC_042496.1	26264008	-	3.2018e-05	0.0494849	39.1321
N/A	NC_042494.1	83192376	-	6.61353e-07	0.00465654	39.0583
N/A	NC_042496.1	41993429	+	1.44267e-06	0.00787814	39.0017
regulatory-associated protein of mTOR-like	NC_042494.1	10485381	-	3.0522e-05	0.0481789	38.9779
uncharacterized LOC100571833	NC_042493.1	122157356	-	3.18456e-07	0.00294627	38.9744
GDP-fucose protein O-fucosyltransferase 2-like	NC_042495.1	69597583	+	7.22194e-06	0.0210688	38.8786
N/A	NW_021770744.1	25263	+	4.73081e-11	3.63613e-06	38.8484
possible pseudogene or miscRNA, No KEGG entry	NC_042495.1	37598587	-	1.26715e-05	0.0295987	38.834
LOC103307766	NC_042495.1	63192961	+	1.03255e-05	0.0258575	38.8074
LOC107883404	NC_042493.1	131400599	-	3.79554e-07	0.00331219	38.7771
LOC103309436	NC_042493.1	25427446	-	6.03173e-07	0.00439667	38.7634
probable anion transporter 2, chloroplastic-like	NC_042495.1	65645856	-	4.40805e-06	0.0161929	38.7402
acyl-CoA-binding domain-containing protein 2-like	NC_042494.1	76899831	-	1.08081e-05	0.0267355	38.7324
N/A	NC_042495.1	17275377	+	3.62457e-07	0.00321586	38.7281
c-terminal-binding protein-like	NC_042495.1	76504211	+	2.08215e-05	0.0391653	38.7013
uncharacterized LOC100160456	NC_042496.1	14159125	-	2.92165e-06	0.0129693	38.6928
N/A	NC_042494.1	169318051	-	2.40361e-06	0.0113282	38.6822
ring canal kelch homolog	NC_042493.1	105107228	-	4.56055e-07	0.00371987	38.6813
exosome complex exonuclease RRP44-like	NC_042494.1	80857933	-	2.98296e-05	0.047627	38.6529
N/A	NC_042493.1	103790631	-	5.17695e-09	0.00013794	38.6252
LOC103311504	NC_042493.1	109692076	+	5.96402e-11	4.40395e-06	38.5166
acetyl-CoA carboxylase-like	NC_042493.1	29602519	+	1.77257e-05	0.0357804	38.4868
kelch-like protein 2-like	NC_042494.1	21863711	-	1.83423e-05	0.0365451	38.4615
adenosine monophosphate-protein transferase FICD homolog	NC_042494.1	68188839	+	5.60074e-06	0.018545	38.4491
lambda-crystallin homolog	NC_042494.1	134602233	+	1.08823e-05	0.0268481	38.4199
uncharacterized LOC100164619	NC_042493.1	46517011	+	1.18814e-05	0.0284695	38.381
N/A	NW_021770420.1	1371	+	4.71987e-06	0.0168731	38.3794
N/A	NC_042493.1	127767409	-	2.11564e-05	0.0395666	38.3459
uncharacterized LOC100161080	NC_042494.1	58217691	-	3.06976e-05	0.0483796	38.3077
N/A	NC_042495.1	17275365	+	1.58377e-06	0.00846247	38.256
uncharacterized LOC100169471	NC_042495.1	70832250	-	4.33624e-08	0.000747021	38.1341
SET and MYND domain-containing protein 4-like	NC_042495.1	17664156	-	1.17462e-05	0.0283836	38.0952
uncharacterized LOC100572889	NC_042493.1	105171679	+	8.0019e-06	0.0221173	38.0233
mediator of RNA polymerase II transcription subunit 13-like	NC_042496.1	34954292	+	1.94241e-06	0.00989666	37.9606
UPF0636 protein C4orf41 homolog	NC_042495.1	11654778	+	3.63821e-08	0.000655001	37.931
# tubulin glycylase 3A-like & deoxyribodipyrimidine photo-lyase	NC_042495.1	71407380	-	3.19094e-06	0.0134228	37.9227
LOC107882143	NW_021770465.1	34717	-	6.98429e-06	0.0209064	37.8827
N/A	NC_042493.1	127778678	+	6.39187e-09	0.000157696	37.8242
ATP-binding cassette sub-family F member 1-like	NC_042494.1	96662714	+	2.99538e-05	0.0476964	37.8151
e3 ubiquitin-protein ligase RNF8-B-like	NW_021770561.1	33181	-	2.64345e-05	0.0446864	37.7885
possible pseudogene or miscRNA, No KEGG entry	NC_042494.1	127762342	-	3.08933e-05	0.048573	37.7565
uncharacterized LOC100573651	NC_042496.1	42048482	-	3.31323e-06	0.0136674	37.7451
protein aveugle-like	NC_042495.1	7925704	+	3.02303e-05	0.0479076	37.7289
uncharacterized LOC100571585	NC_042495.1	51060705	+	4.76294e-07	0.00382254	37.6923
N/A	NC_042493.1	47546088	-	2.9983e-06	0.0131398	37.6496
uncharacterized LOC100572761	NC_042493.1	16650748	+	3.01498e-05	0.047894	37.5636
LOC103311504	NC_042493.1	109692050	+	1.55265e-11	1.55139e-06	37.5552
possible pseudogene or miscRNA, No KEGG entry	NC_042494.1	9411066	-	1.28534e-06	0.00733883	37.5
transcription elongation factor SPT6-like	NC_042495.1	46612373	-	2.49112e-06	0.0115796	37.5
tyrosine-protein phosphatase Lar-like	NC_042495.1	4809412	+	5.21162e-07	0.00402115	37.4946
N/A	NC_042493.1	97863272	+	2.20969e-05	0.0405862	37.4063
uncharacterized LOC100569124	NC_042493.1	74731070	-	2.86442e-07	0.00275201	37.3395
e3 ubiquitin-protein ligase RING2-like	NC_042493.1	7725785	-	7.99936e-07	0.0053464	37.2881
dynamin-1-like protein-like	NC_042494.1	12925661	-	1.16426e-05	0.0281675	37.206
ubiquilin-1-like	NC_042495.1	112132082	-	8.79303e-06	0.0234603	37.1736
LOC115033925	NC_042494.1	169407979	+	1.98489e-05	0.0382502	37.0986
serine/arginine-rich splicing factor 1-like	NC_042494.1	93279257	+	7.63685e-06	0.0215401	37.0256
uncharacterized LOC100572761	NC_042493.1	16650678	+	3.82854e-07	0.00332646	36.9565
spectrin beta chain-like	NC_042494.1	111658902	-	2.618e-05	0.0446014	36.9388
LOC103307780	NC_042493.1	8956753	+	2.30969e-05	0.0414702	36.9318
N/A	NW_021770784.1	29980	-	3.60512e-07	0.00321586	36.9318
tyrosine-protein phosphatase non-receptor type 2-like	NC_042495.1	86118568	+	2.12682e-05	0.0395733	36.9287
LOC103311504	NC_042493.1	109693119	+	9.8115e-10	4.20195e-05	36.8952
N/A	NC_042493.1	127767753	-	3.3631e-06	0.013772	36.8506
uncharacterized LOC100161066	NC_042494.1	157427947	+	7.42763e-11	4.94773e-06	36.7965
putative zinc finger protein 66-like	NC_042495.1	96382851	-	3.00305e-05	0.0477804	36.6794
N/A	NC_042495.1	17275342	+	2.49253e-05	0.0434018	36.6667
cyclin-dependent kinase 12-like	NC_042493.1	60867299	+	7.05552e-06	0.0209193	36.6516
cell division control protein 45 homolog	NC_042496.1	33369272	+	8.3054e-06	0.0224836	36.6434
protein piwi-like	NC_042493.1	57322737	-	1.82268e-06	0.00934344	36.626
N/A	NW_021770744.1	25275	+	1.12845e-09	4.51015e-05	36.6227
LOC103307766	NC_042495.1	63196870	-	1.23757e-06	0.00715767	36.5602
bromodomain-containing protein 7-like	NC_042494.1	51403411	+	9.5194e-07	0.00603915	36.4886
F-box only protein 5	NC_042494.1	46781999	-	1.39624e-05	0.0310714	36.4825
uncharacterized LOC100161914	NC_042494.1	82059113	-	1.09439e-05	0.0268826	36.4407
uncharacterized protein C22orf25 homolog	NC_042496.1	11294896	-	3.15717e-07	0.00293905	36.3636
LOC115034191	NC_042495.1	32812850	-	1.80311e-05	0.036214	36.3392
uncharacterized LOC100161066	NC_042494.1	157427916	+	1.80188e-08	0.000391396	36.2923
DNA topoisomerase 3-alpha-like	NC_042494.1	152475305	-	1.11076e-05	0.027169	36.2381
N/A	NC_042495.1	37038065	+	1.26249e-05	0.0295424	36.2209
anaphase-promoting complex subunit 1-like	NC_042494.1	133568321	-	9.63855e-07	0.0060496	36.1702
N/A	NC_042495.1	76852682	+	2.1569e-05	0.0398364	36.1538
LOC103308268	NC_042496.1	41992451	+	1.97361e-08	0.000419576	36.0686
uncharacterized LOC100163586	NC_042495.1	14822305	-	1.52095e-07	0.00177745	36.0656
uncharacterized LOC100163645	NC_042495.1	64058942	+	1.3182e-05	0.0303137	36.0131
probable cleavage and polyadenylation specificity factor subunit 2-like	NC_042495.1	16745843	+	7.19091e-06	0.0210632	35.9308
carnitine O-palmitoyltransferase 1, liver isoform-like	NC_042494.1	159168960	+	1.78153e-05	0.0358887	35.8627
LOC107882329	NC_042495.1	17455933	-	4.03145e-06	0.0152872	35.8327
N/A	NC_042496.1	25064430	+	3.18232e-06	0.0134166	35.7692
uncharacterized LOC100571585	NC_042495.1	51060613	-	5.82708e-08	0.000902689	35.7661
N/A	NC_042496.1	42030167	+	6.32756e-06	0.0197576	35.7402
lymphocyte-specific helicase-like	NC_042493.1	85938141	+	5.06467e-07	0.00392291	35.7143
LOC103307766	NC_042495.1	63197447	+	1.4692e-05	0.0320177	35.6908
LOC107882204	NC_042493.1	18692784	-	1.0943e-06	0.00662675	35.6647
N/A	NC_042496.1	20648049	-	4.32701e-06	0.0160129	35.6451
N/A	NC_042496.1	20649558	+	2.05684e-06	0.0102758	35.6295
LOC103311504	NC_042493.1	109693130	+	2.4354e-09	7.97843e-05	35.5951
LOC103311504	NC_042493.1	109693120	-	3.31741e-08	0.000613836	35.5442
phosphatidylinositol-4,5-bisphosphate 3-kinase catalytic subunit delta isoform-like	NC_042494.1	147256646	-	5.25337e-06	0.0178845	35.4597
LOC100164786	NC_042495.1	56646369	+	1.37234e-05	0.0308835	35.3682
cdc42-interacting protein 4-like	NC_042494.1	84865519	+	3.91559e-06	0.0149456	35.1669
LOC115034275	NC_042495.1	51786449	-	2.31553e-05	0.0414991	35.1648
N/A	NC_042495.1	17275358	+	1.46008e-05	0.0319477	35.153
SET and MYND domain-containing protein 4-like	NC_042495.1	17662463	+	2.15476e-05	0.0398336	35.1475
general transcription factor IIH subunit 4-like	NC_042493.1	114040339	+	1.33854e-05	0.0305685	35.1315
ATP-dependent RNA helicase DDX19A-like	NC_042494.1	61594163	-	1.18651e-05	0.0284695	35.1293
innexin inx2-like	NC_042493.1	39834616	+	5.0194e-06	0.017475	35.119
N/A	NC_042493.1	113909208	-	3.29803e-06	0.0136635	34.9555
arrestin domain-containing protein 3-like	NC_042493.1	95876824	-	3.04643e-05	0.0481524	34.9359
e3 SUMO-protein ligase PIAS2-like	NC_042495.1	16991963	-	8.22388e-06	0.0223602	34.8837
N/A	NC_042495.1	112065148	-	7.64218e-06	0.0215401	34.8739
N/A	NC_042494.1	122286875	+	2.31753e-05	0.0414991	34.8607
N/A	NC_042494.1	108015767	+	2.17344e-06	0.0107509	34.8456
LOC115034217	NC_042495.1	76594332	+	9.3159e-06	0.0241461	34.7368
N/A	NC_042493.1	97863277	+	9.23951e-06	0.0240396	34.6336
ATP synthase, H+ transporting, mitochondrial F0 complex, subunit G (EC:3.6.1.14)	NC_042494.1	114035039	+	1.15994e-05	0.0281617	34.6154
LOC103307762	NC_042496.1	22141991	-	1.05856e-05	0.0263109	34.5385
uncharacterized LOC100568635	NC_042493.1	102611794	-	2.24421e-05	0.0408655	34.4597
uncharacterized LOC100160594	NC_042495.1	11419323	-	1.90083e-05	0.0372045	34.4565
uncharacterized LOC100570267	NC_042494.1	68540451	-	3.89037e-06	0.0149338	34.4449
N/A	NC_042495.1	21725464	-	5.67341e-06	0.0186474	34.2857
N/A	NC_042493.1	116946579	+	1.00929e-09	4.20195e-05	34.2481
Y+L amino acid transporter 2-like	NC_042493.1	30420496	-	2.75297e-05	0.0456554	34.105
N/A	NC_042493.1	35333695	+	3.12554e-05	0.0488732	34.0113
N/A	NC_042493.1	102863734	+	3.34819e-06	0.0137391	33.8996
N/A	NC_042496.1	38666600	+	9.03174e-07	0.00584104	33.8462
N/A	NC_042493.1	102863547	-	2.2133e-07	0.00234373	33.7711
LOC107884273	NC_042495.1	33783755	-	2.59303e-05	0.0444296	33.7302
F-box only protein 5	NC_042494.1	46780679	+	6.80191e-06	0.0206264	33.7127
N/A	NC_042493.1	93548846	+	4.71005e-07	0.00381071	33.6996
LOC103311504	NC_042493.1	109691939	-	3.11871e-09	9.34131e-05	33.6957
# LOC103307712 & LOC115034271	NC_042495.1	17757825	-	2.18151e-06	0.0107641	33.6247
LOC107883359	NC_042495.1	18085756	-	9.65696e-07	0.0060496	33.5758
RING finger protein 10-like	NC_042496.1	9471772	+	7.94518e-06	0.0220214	33.4799
poly [ADP-ribose] polymerase 12-like	NC_042495.1	89110837	+	7.09395e-06	0.0209632	33.4722
uncharacterized LOC100164676	NC_042493.1	16051438	+	6.07233e-07	0.00439667	33.3333
polyubiquitin-G-like	NC_042496.1	36748986	-	2.16153e-06	0.0107509	33.3333
protein GPR107-like	NC_042494.1	109972265	+	7.61573e-06	0.0215401	33.2667
N/A	NC_042496.1	27898197	-	1.87828e-05	0.0369629	33.23
ring canal kelch homolog	NC_042493.1	105107704	+	1.08581e-06	0.00661433	33.2112
LOC103309712	NC_042493.1	41489639	+	6.31667e-08	0.00094316	33.2074
N/A	NC_042493.1	127780467	-	1.45276e-06	0.00791054	33.2074
LOC100294629	NC_042493.1	28445011	-	8.23593e-06	0.0223621	33.1522
N/A	NW_021776152.1	40365	-	1.31353e-05	0.0303137	33.1351
cyclin-dependent kinase 7-like	NC_042496.1	22919418	+	2.90808e-05	0.0470562	33.1277
LOC103307730	NW_021771124.1	15760	+	2.84684e-05	0.0464792	33.1019
uncharacterized LOC100570978	NW_021761949.1	20033	-	3.76844e-07	0.00330296	33.0882
N/A	NC_042496.1	41993430	-	6.3981e-06	0.019823	33.0393
tetratricopeptide repeat protein 5-like	NC_042496.1	33236349	-	2.61674e-05	0.0446014	32.9797
N/A	NC_042493.1	116946593	+	4.09875e-09	0.000115364	32.953
dihydrolipoyllysine-residue acetyltransferase component 1 of pyruvate dehydrogenase complex, mitochondrial-like	NC_042494.1	70200149	-	1.42065e-05	0.0313354	32.9167
N/A	NC_042493.1	93715178	+	3.73688e-06	0.0145809	32.8622
ring canal kelch homolog	NC_042493.1	116957356	+	1.93716e-05	0.037659	32.8571
DNA-directed RNA polymerase I subunit RPA2-like	NC_042496.1	2587133	-	2.35184e-05	0.0418136	32.8433
N/A	NW_021770126.1	8943	-	1.25546e-05	0.0294135	32.8415
N/A	NC_042496.1	20621287	+	2.91928e-09	9.04615e-05	32.8321
uncharacterized LOC100168845	NC_042495.1	54049531	+	1.90594e-07	0.00212781	32.7869
uncharacterized LOC100575766	NC_042494.1	169390856	-	6.05455e-06	0.0193588	32.6923
LOC107882167	NC_042493.1	111421962	+	1.4799e-05	0.0321456	32.6836
N/A	NW_021767983.1	896	+	1.30525e-11	1.37283e-06	32.6024
uncharacterized LOC100570440	NC_042493.1	72461801	+	2.69081e-05	0.0451593	32.5911
alpha,alpha-trehalose-phosphate synthase [UDP-forming] A-like	NC_042495.1	25424674	-	1.46745e-05	0.0320143	32.5753
protein piwi-like	NC_042493.1	57320496	-	6.89939e-06	0.0207629	32.5497
importin subunit alpha-7-like	NC_042495.1	90307599	+	1.50187e-05	0.0324501	32.4303
spectrin beta chain-like	NC_042494.1	111658941	-	8.08798e-06	0.0222852	32.3607
N/A	NC_042493.1	127780481	-	1.0024e-06	0.00624043	32.2389
CUE domain-containing protein 1-like	NC_042495.1	114583161	+	2.91067e-05	0.0470569	32.2115
N/A	NC_042496.1	42058493	-	9.63727e-06	0.0245649	32.1528
N/A	NC_042493.1	125940162	-	2.12198e-05	0.0395733	32.0906
LOC107882895	NC_042493.1	111407297	+	3.60959e-07	0.00321586	32.0635
LOC103312028	NC_042495.1	110741506	-	3.16013e-05	0.0492084	32.0158
LOC115034441	NC_042496.1	22141132	-	6.14224e-06	0.0194447	31.959
N/A	NC_042493.1	104765609	-	2.70562e-05	0.0451593	31.9444
N/A	NC_042493.1	127780449	-	1.94018e-07	0.0021421	31.939
N/A	NC_042493.1	102860182	-	4.22705e-07	0.00354926	31.8681
N/A	NC_042493.1	93715188	+	4.55731e-06	0.016439	31.8182
LOC103310948	NC_042495.1	34962561	-	9.23214e-06	0.0240396	31.7813
N/A	NC_042493.1	6908348	-	9.62197e-06	0.0245572	31.7547
uncharacterized LOC100570473	NC_042493.1	33507636	+	2.0251e-05	0.038661	31.7273
N/A	NC_042493.1	131269405	-	6.16899e-06	0.0194447	31.6722
N/A	NW_021770492.1	19400	+	8.09637e-09	0.000194935	31.6327
uncharacterized LOC100571572	NC_042493.1	35634681	-	2.13798e-05	0.0396074	31.5727
LOC103310162	NC_042493.1	876490	+	1.07301e-07	0.0013898	31.5476
LOC103307766	NC_042495.1	63191393	+	1.70659e-05	0.0348357	31.4973
guanylate cyclase 32E-like	NC_042495.1	94335357	-	6.49076e-06	0.0199653	31.4815
N/A	NC_042495.1	21725326	-	6.90693e-08	0.000992996	31.3253
rootletin-like	NC_042495.1	115129536	-	6.39751e-06	0.019823	31.308
LOC103311504	NC_042493.1	109693149	+	3.69351e-09	0.000108544	31.2725
anaphase-promoting complex subunit 1-like	NC_042494.1	133568333	-	5.26495e-06	0.0178934	31.25
# uncharacterized LOC100574055 & LOC103310161	NC_042495.1	33212038	-	2.72151e-05	0.045348	31.1166
sister chromatid cohesion protein PDS5 homolog B-B-like	NC_042496.1	2678716	+	9.83336e-07	0.00614086	31.1111
protein piwi-like	NC_042493.1	57319919	-	1.51955e-05	0.032547	31.0749
kelch-like protein 2	NC_042493.1	116980962	+	8.69525e-06	0.0232927	31.0625
LOC103311504	NC_042493.1	109691955	-	4.81651e-08	0.000802099	30.9896
zinc finger protein 250-like	NC_042496.1	10379124	-	8.89958e-06	0.0236283	30.9524
N/A	NW_021763086.1	67	+	2.23439e-05	0.0407823	30.8665
uncharacterized LOC100574563	NC_042493.1	54915768	+	1.75116e-05	0.0355277	30.7692
N/A	NC_042495.1	17275390	+	1.23449e-05	0.0290989	30.7692
endoribonuclease dcr-1-like	NC_042495.1	65519484	-	6.16193e-06	0.0194447	30.7692
transmembrane protein 188-like	NC_042495.1	98875588	+	1.81475e-05	0.0363056	30.7669
v-type proton ATPase 116 kDa subunit a isoform 1-like	NC_042494.1	70552516	-	1.58317e-05	0.0334083	30.7576
# putative leucine-rich repeat-containing protein DDB_G0290503 & ATPase family AAA domain-containing protein 1-B	NC_042495.1	101467693	+	9.43881e-06	0.0242651	30.74
LOC115033364	NC_042493.1	111766932	-	1.8579e-05	0.0367967	30.7083
N/A	NC_042496.1	42254137	+	3.22569e-05	0.0497213	30.6513
protein SPT2 homolog	NC_042495.1	70873198	-	4.02914e-06	0.0152872	30.6452
cytoskeleton-associated protein 5-like	NC_042495.1	116123663	-	2.76509e-05	0.0457425	30.5556
N/A	NW_021767983.1	884	+	2.79213e-10	1.59421e-05	30.4893
# uncharacterized LOC100569640 & zinc finger BED domain-containing protein 4-like	NC_042495.1	118675444	-	3.57054e-06	0.0141573	30.4878
LOC107882659	NC_042493.1	116341679	+	8.56386e-11	5.52058e-06	30.4818
LOC107885068	NC_042493.1	46979840	+	1.65854e-05	0.034314	30.4705
N/A	NW_021771149.1	5538	-	2.01025e-05	0.0384792	30.4507
LOC103307712	NC_042495.1	17719373	+	1.18116e-05	0.0284045	30.4396
N/A	NW_021770744.1	25234	+	1.26333e-08	0.000290185	30.4388
sterile alpha and TIR motif-containing protein 1-like	NC_042495.1	65889163	-	3.08107e-05	0.0484813	30.4308
N/A	NC_042493.1	111578763	-	2.74026e-08	0.000542185	30.3797
SET and MYND domain-containing protein 4-like	NC_042495.1	17664169	+	5.99546e-06	0.0192629	30.2584
lon protease homolog 2, peroxisomal-like	NC_042493.1	116989979	-	2.26623e-10	1.34521e-05	30.246
N/A	NC_042495.1	69742095	-	2.50754e-09	8.08226e-05	30.2326
uncharacterized LOC100570654	NC_042493.1	111782560	-	5.85145e-06	0.0189828	30.1994
uncharacterized LOC100568635	NC_042493.1	102612298	+	7.5539e-07	0.0051697	30.1069
N/A	NC_042493.1	93559580	+	2.67408e-06	0.0121175	29.9123
N/A	NC_042493.1	6929633	+	3.06558e-05	0.0483519	29.8532
LOC103307766	NC_042495.1	63193203	+	1.8974e-07	0.00212781	29.7816
# TNF receptor-associated factor 3 & neuropilin and tolloid-like protein 1-like	NC_042496.1	41116345	-	1.28635e-05	0.0299256	29.7297
uncharacterized LOC100159693	NC_042494.1	18424598	-	2.86763e-05	0.0466661	29.6974
uncharacterized LOC100573651	NC_042496.1	42052012	+	2.00988e-05	0.0384792	29.6485
LOC107882925	NW_021771027.1	53560	-	5.44276e-08	0.000863229	29.6477
pumilio homolog 2-like	NC_042494.1	141453160	-	1.83989e-05	0.036585	29.6296
N/A	NC_042493.1	128207218	-	1.42369e-05	0.0313398	29.6184
uncharacterized protein C05D11.1-like	NC_042493.1	42639001	-	1.76907e-06	0.0092136	29.5455
N/A	NC_042493.1	129523474	-	8.11575e-08	0.00113415	29.5455
N/A	NC_042494.1	169318068	-	2.0216e-06	0.0101505	29.5082
uncharacterized LOC100569795	NW_021770784.1	34160	-	6.79861e-06	0.0206264	29.5074
# RNA pseudouridylate synthase domain-containing protein 2 & LOC107882416	NC_042493.1	33441903	-	3.10518e-06	0.0132876	29.4161
N/A	NC_042496.1	812154	+	8.26947e-06	0.0224227	29.4118
N/A	NC_042495.1	4113962	-	2.1986e-05	0.0404197	29.329
uncharacterized LOC100574679	NC_042495.1	22972095	-	1.7658e-05	0.0356798	29.3269
N/A	NW_021770744.1	25251	+	3.96682e-07	0.00340223	29.2831
cytoskeleton-associated protein 5-like	NC_042495.1	116111927	-	2.54019e-05	0.0438363	29.2683
LOC103310757	NW_021770853.1	5207	-	3.15487e-11	2.62693e-06	29.225
LOC103310948	NC_042495.1	34963932	-	1.19739e-09	4.59731e-05	28.9947
N/A	NW_021770096.1	6432	+	1.07186e-08	0.000254997	28.897
guanylate cyclase 32E-like	NC_042495.1	94339341	-	3.11867e-06	0.0132884	28.8889
guanylate cyclase 32E-like	NC_042495.1	94339350	-	4.983e-06	0.0174229	28.8889
uncharacterized LOC100571572	NC_042493.1	35634758	-	1.24226e-05	0.0292404	28.7749
N/A	NW_021764433.1	383	-	3.63688e-07	0.00321586	28.5941
LOC103311504	NC_042493.1	109692051	-	6.11059e-07	0.0044084	28.485
LOC107883404	NC_042493.1	131400761	+	2.89211e-11	2.51284e-06	28.4409
LOC103311504	NC_042493.1	109692949	+	1.6335e-05	0.0340745	28.4347
LOC107882895	NC_042493.1	111407170	+	5.28849e-06	0.0179338	28.4025
uncharacterized LOC100570978	NW_021761949.1	20053	-	1.01787e-06	0.00627807	28.3876
# legumain & uncharacterized LOC100571675	NC_042493.1	4022207	+	3.34089e-06	0.0137373	28.3736
N/A	NW_021770784.1	32786	-	3.12725e-06	0.0132966	28.2353
N/A	NW_021770784.1	30145	+	2.40934e-06	0.0113282	28.1596
N/A	NC_042493.1	103789337	-	2.45502e-07	0.00252889	28.1188
toll-like receptor 13-like	NC_042495.1	36972636	-	2.02555e-05	0.038661	28
LOC103310757	NW_021770853.1	5226	-	5.66265e-10	2.76002e-05	27.9862
LOC103311504	NC_042493.1	109692950	-	1.74057e-05	0.0353847	27.9663
partitioning defective protein 6-like	NC_042496.1	15241339	+	2.3859e-05	0.0422687	27.9631
LOC103311504	NC_042493.1	109693101	-	3.10299e-06	0.0132876	27.9167
serine/threonine-protein kinase pelle-like	NC_042495.1	43410003	+	7.55357e-06	0.0215401	27.907
rap guanine nucleotide exchange factor 2-like	NC_042495.1	51769837	+	1.38564e-05	0.031041	27.907
structural maintenance of chromosomes protein 3-like	NC_042495.1	79873669	-	4.88601e-06	0.0171903	27.907
small conductance calcium-activated potassium channel protein-like	NC_042494.1	6089822	-	1.6206e-05	0.0339613	27.907
N/A	NC_042496.1	42058640	-	2.85173e-05	0.046521	27.8907
LOC107884444	NC_042494.1	75964852	-	1.46818e-06	0.00795118	27.8689
zinc finger SWIM domain-containing protein 3-like	NC_042494.1	149274774	-	7.45176e-06	0.0214309	27.7778
N/A	NC_042496.1	24949875	-	1.31808e-05	0.0303137	27.6786
LOC103310757	NW_021770853.1	5219	-	6.66524e-11	4.59298e-06	27.6356
myelin-associated glycoprotein-like	NC_042493.1	86691751	+	8.91831e-06	0.0236311	27.6316
LOC107882659	NC_042493.1	116339895	+	2.36585e-11	2.14903e-06	27.6253
# RNA pseudouridylate synthase domain-containing protein 2 & LOC107882416	NC_042493.1	33441761	+	3.00757e-08	0.00058352	27.5699
LOC103307766	NC_042495.1	63191547	+	4.96203e-06	0.0173965	27.5669
LOC103311504	NC_042493.1	109691917	-	2.61641e-07	0.00261428	27.5624
LOC107882659	NC_042493.1	116341720	-	4.76415e-06	0.0169805	27.5089
LOC107882204	NC_042493.1	18692803	-	3.20178e-05	0.0494849	27.5006
N/A	NC_042493.1	113045296	+	2.02786e-05	0.0386612	27.5
N/A	NC_042493.1	111759626	-	7.50268e-06	0.021511	27.3736
ring canal kelch homolog	NC_042493.1	105106968	+	1.33741e-05	0.0305685	27.3535
LOC107882659	NC_042493.1	116341686	+	2.43317e-08	0.000496	27.3301
N/A	NC_042493.1	84898956	+	8.77913e-06	0.0234545	27.2727
N/A	NW_021771027.1	55836	-	7.48004e-07	0.00513675	27.2348
LOC115033708	NC_042494.1	39961875	+	2.35741e-06	0.0112334	27.2028
LOC103307766	NC_042495.1	63193095	+	2.39267e-05	0.0423137	27.1546
N/A	NW_021771149.1	5523	-	4.30854e-06	0.0160038	27.1299
N/A	NC_042493.1	127779586	-	1.20621e-06	0.00704811	27.0755
LOC103311504	NC_042493.1	109693273	+	1.82748e-05	0.0364471	26.9231
N/A	NC_042493.1	97861968	+	9.02707e-06	0.0237362	26.8657
N/A	NC_042493.1	127777592	-	3.72696e-07	0.003281	26.8122
ring canal kelch homolog	NC_042493.1	116979836	-	3.04811e-05	0.0481524	26.7417
LOC103307766	NC_042495.1	63193070	-	5.20124e-06	0.0177676	26.6845
LOC107882895	NC_042493.1	111407362	-	2.25521e-06	0.0110294	26.6178
N/A	NC_042493.1	103789274	-	3.46741e-07	0.00314963	26.5413
Hibadh	NC_042494.1	63752924	+	1.00653e-05	0.0253967	26.5349
N/A	NC_042494.1	121675053	-	1.03686e-05	0.0259328	26.5306
uncharacterized LOC100574279	NC_042495.1	22651581	+	1.53716e-05	0.0328186	26.451
uncharacterized LOC100570654	NC_042493.1	111782086	-	3.298e-11	2.63625e-06	26.4447
LOC103311504	NC_042493.1	109691943	-	2.66884e-06	0.0121175	26.398
uncharacterized LOC100573651	NC_042496.1	42052022	+	2.40874e-05	0.0424514	26.3338
26S protease regulatory subunit 8-like	NC_042495.1	5172188	+	1.31517e-05	0.0303137	26.3158
LOC115033895	NC_042494.1	157232659	+	3.51859e-06	0.014056	26.2937
LOC107882895	NC_042493.1	111407357	-	1.04103e-06	0.00638409	26.2403
N/A	NC_042494.1	134593632	+	1.35572e-05	0.0307517	26.1905
uncharacterized LOC100570920	NC_042495.1	85716984	-	2.53311e-05	0.0437899	26.1905
protein MCM10 homolog	NC_042495.1	98512446	+	2.92265e-05	0.0471012	26.1905
LOC103307766	NC_042495.1	63196677	-	3.17747e-08	0.000599036	26.1307
matrix metalloproteinase-17-like	NC_042495.1	77436881	+	1.31064e-05	0.0303137	26.087
cAMP-specific 3',5'-cyclic phosphodiesterase-like	NC_042495.1	100027532	-	5.00708e-06	0.0174625	26.087
3-phosphoinositide-dependent protein kinase 1-like	NC_042496.1	4265952	-	8.19187e-06	0.0223602	26.087
N/A	NW_021770096.1	6462	+	5.34787e-09	0.000140619	25.8558
possible pseudogene or miscRNA, No KEGG entry	NW_021770075.1	12133	+	3.31705e-06	0.0136674	25.8373
LOC107882365	NC_042495.1	63203241	-	2.67103e-07	0.00265558	25.8072
LOC103311504	NC_042493.1	109692077	-	1.08099e-05	0.0267355	25.6786
LOC107883404	NC_042493.1	131400623	+	3.11359e-05	0.0488009	25.6691
polyubiquitin-G-like	NC_042496.1	36748974	-	2.31595e-05	0.0414991	25.641
uncharacterized LOC100573660	NC_042493.1	66603798	+	2.0706e-05	0.0391099	25.5319
uncharacterized LOC100161066	NC_042494.1	157427882	+	5.78052e-07	0.00427325	25.4959
N/A	NC_042493.1	62667726	+	6.16049e-06	0.0194447	25.4141
N/A	NC_042493.1	46029308	+	3.76767e-06	0.0146319	25.3968
CAAX prenyl protease 1 homolog	NC_042495.1	67701375	+	2.38156e-06	0.0112892	25.3872
N/A	NC_042493.1	103789317	-	1.41728e-05	0.0313257	25.336
N/A	NC_042494.1	108015358	+	3.45038e-06	0.0139147	25.2008
N/A	NC_042495.1	32765531	-	2.40895e-05	0.0424514	25.1268
LOC103311504	NC_042493.1	109691776	+	5.0767e-06	0.0176438	25.1234
ring canal kelch homolog	NC_042493.1	105107626	+	2.2416e-05	0.0408655	25.0414
N/A	NC_042493.1	129874104	-	2.59219e-06	0.0118811	25.0119
N/A	NC_042494.1	161352359	-	1.27246e-05	0.0296369	-25.3448
N/A	NC_042496.1	29299953	+	2.62286e-05	0.0446082	-25.38
N/A	NC_042495.1	24194100	-	2.35998e-05	0.0418839	-25.4007
N/A	NC_042493.1	124593461	-	6.46196e-06	0.0199589	-25.4545
protein farnesyltransferase subunit beta-like	NC_042494.1	77991106	-	2.77775e-05	0.0458759	-25.5319
uncharacterized LOC100571172	NC_042494.1	155535326	+	1.70799e-07	0.00196161	-25.5814
neurotrimin-like	NC_042495.1	112466750	+	1.52547e-05	0.0326388	-25.5814
ARF GTPase-activating protein GIT2-like	NC_042495.1	76712743	-	7.0203e-06	0.0209064	-25.641
neurogenic locus Notch protein-like	NC_042495.1	61805194	-	5.1199e-06	0.0177015	-25.7143
N/A	NC_042493.1	125473663	+	1.62127e-05	0.0339613	-25.8065
N/A	NC_042494.1	116737637	+	1.78867e-05	0.0359962	-25.8065
max dimerization protein 1-like	NC_042496.1	7419920	-	8.91929e-07	0.00578704	-25.9259
LOC103310917	NC_042496.1	34486777	-	1.39432e-05	0.0310704	-26.1301
uncharacterized LOC100164079	NC_042495.1	3370940	+	1.66731e-05	0.0343495	-26.1905
fasciclin-2-like	NC_042496.1	30783915	-	4.5935e-06	0.01651	-26.1905
N/A	NC_042493.1	118916513	-	1.1633e-05	0.0281675	-26.3158
histone-lysine N-methyltransferase EHMT1-like	NC_042495.1	88252274	+	3.8598e-06	0.0149194	-26.3158
N/A	NW_021770047.1	9133	+	1.31517e-05	0.0303137	-26.3158
muscarinic acetylcholine receptor M3-like	NC_042495.1	12983144	-	7.37586e-06	0.0213621	-26.4151
N/A	NC_042495.1	7166621	-	6.15908e-06	0.0194447	-26.4706
N/A	NW_021770997.1	5882	-	8.14013e-06	0.0223142	-26.5371
LOC107882624	NW_021771038.1	36099	+	5.1442e-06	0.0177134	-26.555
cAMP-specific 3',5'-cyclic phosphodiesterase-like	NC_042495.1	100093273	-	8.22178e-07	0.00544046	-26.6667
uncharacterized LOC100169563	NC_042495.1	116750913	+	2.44352e-05	0.0428339	-26.8293
Y+L amino acid transporter 2-like	NC_042495.1	94319657	-	3.91893e-06	0.0149456	-26.9231
SET and MYND domain-containing protein 4-like	NC_042495.1	17664328	-	2.90016e-05	0.0470041	-27.1969
CG17218-like	NC_042494.1	84479927	-	1.4267e-05	0.0313398	-27.2201
uncharacterized LOC100159241	NC_042495.1	59246578	-	2.01976e-06	0.0101505	-27.2727
potassium voltage-gated channel protein Shaw-like	NC_042496.1	14520094	-	1.94418e-05	0.0376839	-27.2727
N/A	NC_042496.1	34402368	-	1.94418e-05	0.0376839	-27.2727
N/A	NC_042493.1	24304724	+	5.79619e-06	0.0188955	-27.5
N/A	NC_042494.1	168004834	-	7.69509e-06	0.0216196	-27.7778
uncharacterized LOC100161671	NC_042493.1	21028255	-	1.89936e-05	0.0372045	-27.907
uncharacterized LOC100160106	NC_042494.1	58468251	+	1.38564e-05	0.031041	-27.907
28S ribosomal protein S33, mitochondrial-like	NC_042494.1	106906611	+	1.18716e-05	0.0284695	-27.907
abnormal wing discs 2	NC_042495.1	39062173	+	2.23086e-05	0.0407823	-27.907
N/A	NC_042493.1	37017234	+	2.42017e-06	0.0113282	-28.0183
membrane-associated protein Hem-like	NC_042493.1	58877887	-	1.41818e-06	0.00785057	-28.0604
N/A	NW_021768554.1	669	+	1.23002e-06	0.00714545	-28.2407
N/A	NC_042493.1	72292346	-	2.49768e-05	0.0434388	-28.442
uncharacterized LOC100162746	NC_042494.1	6729298	+	5.34009e-06	0.0180262	-28.5714
N/A	NC_042493.1	37257320	-	4.87865e-07	0.00382628	-28.8889
N/A	NC_042493.1	77484254	-	1.36312e-05	0.0308473	-28.9474
uncharacterized LOC100168156	NC_042495.1	649227	+	6.3974e-06	0.019823	-30.1605
molybdenum cofactor synthesis protein cinnamon-like	NC_042493.1	51904885	-	1.56525e-05	0.0331703	-30.2326
uncharacterized LOC100163158	NC_042493.1	21688762	-	6.23442e-06	0.0195892	-30.303
rap guanine nucleotide exchange factor 2-like	NC_042495.1	51749148	+	4.11495e-07	0.00348442	-30.4348
uncharacterized LOC100574622	NC_042495.1	89149080	-	1.86099e-05	0.0368214	-30.4981
N/A	NC_042494.1	135023044	-	1.67115e-05	0.0343933	-30.5556
N/A	NC_042494.1	92856792	+	7.25015e-07	0.00504826	-30.5829
N/A	NC_042495.1	42380199	+	1.75426e-05	0.0355441	-30.6274
N/A	NC_042494.1	116364922	-	2.76137e-05	0.0457188	-30.9524
N/A	NW_021759357.1	1098	+	1.51476e-05	0.032547	-31.2905
N/A	NC_042496.1	40707856	+	2.28752e-07	0.00239336	-31.3506
N/A	NC_042495.1	91622406	-	6.54734e-06	0.0200224	-31.6092
transformation/transcription domain-associated protein-like	NC_042494.1	112509504	-	2.09824e-05	0.0393716	-31.6367
ARF GTPase-activating protein GIT2-like	NC_042495.1	76712746	-	2.57293e-07	0.00259681	-31.8182
splicing factor U2AF 50 kDa subunit-like	NC_042494.1	105158656	+	5.5092e-07	0.00412339	-32.6923
LOC103310989	NW_021770459.1	30842	-	2.94564e-05	0.0473191	-33.3198
N/A	NC_042494.1	54930380	-	6.07233e-07	0.00439667	-33.3333
N/A	NC_042494.1	70943020	-	1.20693e-08	0.000282763	-33.3333
N/A	NC_042495.1	37694888	+	3.01155e-07	0.00286633	-33.3333
serine/threonine-protein kinase PINK1, mitochondrial-like	NC_042496.1	36764631	+	7.09395e-06	0.0209632	-33.4722
uncharacterized LOC100569183	NC_042493.1	95465110	-	3.78987e-06	0.0146775	-34.0321
ubiquitin carboxyl-terminal hydrolase 4-like	NC_042495.1	96216686	+	6.88923e-06	0.0207629	-34.0426
N/A	NC_042495.1	113351274	+	2.89306e-05	0.0470034	-35.0192
aminopeptidase N-like	NC_042496.1	2395059	+	2.69192e-05	0.0451593	-35.681
nucleolar protein 14-like	NC_042496.1	9881104	-	1.75553e-05	0.0355441	-35.9016
N/A	NC_042495.1	114074021	-	7.46728e-09	0.000181981	-36
protein zyg-11 homolog B-like	NC_042494.1	34889295	+	4.80343e-07	0.00382628	-36.0022
zinc finger protein 234-like	NC_042495.1	107784069	-	2.49283e-07	0.00254293	-36.1111
N/A	NW_021760754.1	3530	-	2.57639e-06	0.0118359	-36.1538
CCR4-NOT transcription complex subunit 1-like	NC_042493.1	56122807	+	4.83777e-07	0.00382628	-36.3636
dolichyl-diphosphooligosaccharide--protein glycosyltransferase subunit 2-like	NC_042494.1	43656841	-	1.79893e-05	0.0361663	-36.5094
proton-coupled amino acid transporter 4-like	NC_042496.1	6245604	+	2.68227e-05	0.0450814	-37.2253
LOC107883536	NC_042494.1	26844836	+	1.34693e-05	0.0306269	-38.0142
CCR4-NOT transcription complex subunit 2-like	NC_042495.1	93057890	-	1.30691e-05	0.0302981	-39.2218
protein crumbs-like	NC_042494.1	26809319	-	1.22899e-06	0.00714545	-40.186
uncharacterized LOC100158742	NC_042496.1	33423792	-	1.09918e-05	0.0269319	-40.625
uncharacterized LOC100169414	NC_042494.1	90899304	-	2.49329e-05	0.0434018	-41.3159
chondroitin sulfate proteoglycan 4-like	NC_042494.1	41406140	+	2.70868e-06	0.0121914	-41.7094
lateral signaling target protein 2 homolog	NC_042495.1	117605963	-	2.54425e-05	0.0438686	-42.2222
uncharacterized LOC100574234	NC_042495.1	91170295	-	1.11673e-07	0.0014242	-42.8501
dosage compensation regulator-like	NC_042493.1	105303789	+	5.09252e-06	0.017668	-43.1818
N/A	NC_042495.1	107378239	-	2.0488e-07	0.00222514	-43.1818
e3 ubiquitin-protein ligase Su(dx)-like	NC_042493.1	28336043	-	1.17913e-05	0.0284045	-44.0058
cysteine and histidine-rich protein 1 homolog	NC_042494.1	107473513	+	1.1954e-06	0.00702603	-44.0753
putative glutamate synthase [NADPH]-like	NC_042494.1	51278383	+	3.11422e-06	0.0132884	-49.026
LOC100160819	NC_042495.1	75589795	-	9.10555e-06	0.0238797	-49.8955
# uncharacterized LOC100575399 & lysine-specific demethylase 3A	NC_042493.1	71713332	+	3.01209e-07	0.00286633	-50.9413
# LOC103307689 & inhibitor of growth protein 2	NC_042495.1	48540629	+	7.34612e-06	0.0213377	-51.2066
N/A	NC_042496.1	13236649	-	7.35951e-10	3.42025e-05	-65.4971

## Sheet: DiffCpG_2v3_25p
Gene Name	chr	DMS	strand	pvalue	qvalue	meth.diff
uncharacterized LOC100569367	NC_042493.1	68057618	-	2.0288e-12	1.88527e-06	67.5941
TBC1 domain family member 22B-like	NC_042493.1	64891593	+	2.18762e-11	1.16163e-05	66.7846
tetratricopeptide repeat protein 28-like	NC_042496.1	30293284	+	3.6388e-13	1.1374e-06	65.8875
uncharacterized LOC100570440	NC_042493.1	72467741	-	7.42475e-12	5.0178e-06	65.3186
uncharacterized LOC100575191	NC_042495.1	81737293	-	6.28943e-10	0.000126975	65.3049
UPF0636 protein C4orf41 homolog	NC_042495.1	11658930	+	1.97759e-12	1.88527e-06	63.1347
ring canal kelch protein-like	NW_021771438.1	52541	+	2.51807e-10	6.70065e-05	62.9573
LOC115033873	NC_042494.1	142126784	-	1.08386e-08	0.000601304	62.5171
# zinc finger protein 391 & uncharacterized LOC115034250	NC_042495.1	46487894	-	8.18512e-10	0.000133356	62.5057
N/A	NC_042494.1	91083011	+	4.10671e-10	8.97922e-05	62.0455
N/A	NW_021771299.1	4913	+	2.98443e-10	6.93322e-05	61.8367
dosage compensation regulator-like	NC_042493.1	116259601	-	3.03634e-12	2.25722e-06	61.6102
N/A	NC_042494.1	122404610	+	6.91455e-09	0.000467299	60.5952
ribosomal protein L11-like	NC_042495.1	85809404	+	1.30912e-09	0.000184856	60.5217
mediator of RNA polymerase II transcription subunit 13-like	NC_042496.1	34954647	-	5.42387e-09	0.000391467	60.3115
N/A	NC_042495.1	102267877	+	9.72694e-09	0.000573891	59.7207
copper homeostasis protein cutC homolog	NC_042493.1	57663585	-	1.02117e-10	4.4667e-05	59.4098
N/A	NC_042493.1	122199496	+	1.00454e-09	0.000155579	59.1301
RPII140-upstream gene protein-like	NC_042495.1	96816396	+	1.6039e-09	0.000205577	58.9185
fasciculation and elongation protein zeta-2-like	NC_042494.1	141271381	+	1.78112e-12	1.88527e-06	58.8571
N/A	NC_042496.1	41967099	+	5.83912e-13	1.1374e-06	58.639
kynurenine--oxoglutarate transaminase 3-like	NC_042493.1	79038799	+	2.30933e-09	0.000258125	58.4184
possible pseudogene or miscRNA, No KEGG entry	NC_042494.1	122268215	+	4.0297e-08	0.00127462	58.3655
N/A	NC_042494.1	76830307	-	6.23711e-09	0.000429322	57.9825
N/A	NC_042495.1	33652342	+	2.60456e-10	6.70065e-05	57.7366
uncharacterized LOC100573514	NC_042495.1	68682959	+	6.34799e-09	0.000432946	57.672
N/A	NC_042493.1	131340172	-	3.06011e-07	0.00440932	57.3257
U3 small nucleolar ribonucleoprotein protein IMP3-like	NC_042495.1	89741366	+	5.33607e-08	0.00151406	57.2436
dipeptidyl peptidase 9-like	NC_042494.1	25611356	+	2.60687e-08	0.000993255	57.179
LOC100160513	NC_042494.1	55739524	+	3.80122e-09	0.000328702	56.8929
transmembrane protein 68-like	NC_042496.1	14397710	-	1.53374e-09	0.000203605	56.8769
e3 SUMO-protein ligase PIAS1-like	NC_042493.1	1487470	-	4.1494e-09	0.000342741	56.6448
RNA-binding protein lark-like	NC_042495.1	59365184	+	2.17192e-08	0.000894854	56.6376
uncharacterized LOC100161391	NC_042493.1	34160825	-	2.92106e-10	6.93322e-05	56.4126
rhotekin-like	NC_042494.1	66710795	-	7.82521e-10	0.000133356	56.3397
KDEL motif-containing protein 1-like	NC_042493.1	81805679	+	2.74421e-09	0.000268428	56.2409
# legumain & uncharacterized LOC100570989	NC_042493.1	4067696	+	3.84982e-09	0.000328702	56.227
N/A	NC_042493.1	3845500	+	8.10502e-08	0.0018888	56.0897
xylosyltransferase oxt-like	NC_042495.1	1838352	-	4.62215e-08	0.0014025	55.8634
membrane-associated protein Hem-like	NC_042493.1	58881454	+	2.40429e-07	0.00381099	55.5102
P protein-like	NC_042495.1	3929867	-	6.74372e-10	0.000128546	55.1815
uncharacterized LOC100161660	NC_042494.1	84249189	-	5.23738e-09	0.000390574	55.1192
uncharacterized LOC100569986	NC_042495.1	2935161	+	7.03279e-09	0.000471008	54.8518
gamma-interferon-inducible lysosomal thiol reductase-like	NC_042496.1	18580506	-	1.38602e-07	0.00276239	54.6584
P protein-like	NC_042495.1	3929913	-	1.38019e-09	0.000186938	54.4767
piwi-like protein 2-like	NC_042495.1	25781177	-	2.7789e-08	0.00103292	54.1667
membrane-associated protein Hem-like	NC_042493.1	58885300	+	1.28027e-08	0.00064308	54.0989
N/A	NC_042496.1	42029873	-	1.29453e-09	0.000184856	54.0909
bumetanide-sensitive sodium-(potassium)-chloride cotransporter-like	NC_042496.1	38161467	-	4.01002e-09	0.00033495	53.8953
cyclic AMP-dependent transcription factor ATF-4-like	NC_042494.1	106602356	-	1.80807e-07	0.00317759	53.8573
# UQCR11 & cytoplasmic tRNA 2-thiolation protein 2-B	NC_042494.1	53653069	-	9.5249e-08	0.00211389	53.8462
uncharacterized LOC100165541	NC_042495.1	74021600	-	7.49295e-10	0.000133356	53.8462
dorsal-ventral patterning protein Sog-like	NC_042494.1	59722918	+	1.57229e-07	0.0029591	53.7449
uncharacterized LOC100167988	NC_042494.1	29535952	+	4.17073e-07	0.00540162	53.6778
THO complex subunit 6-like	NC_042495.1	8455527	+	4.17073e-07	0.00540162	53.6778
uncharacterized LOC100169119	NC_042494.1	54323752	+	1.99889e-09	0.000239674	53.6765
LOC100166016	NC_042493.1	61801584	+	3.65312e-07	0.0049467	53.6613
UDP-GlcNAc:betaGal beta-1,3-N-acetylglucosaminyltransferase 5-like	NC_042494.1	148247486	+	4.64967e-07	0.00579962	53.6585
uncharacterized LOC100159131	NC_042493.1	23172494	+	1.04303e-09	0.000158244	53.6339
transcription initiation factor TFIID subunit 6-like	NC_042494.1	58325456	+	2.08532e-09	0.000246068	53.5968
alanyl-tRNA synthetase, cytoplasmic-like	NC_042495.1	106833850	-	2.42369e-09	0.000258125	53.5556
fasciclin-1-like	NC_042494.1	140823167	+	1.98316e-08	0.000832931	53.3784
t-complex protein 1 subunit gamma-like	NC_042493.1	76524214	-	1.27122e-08	0.00064308	53.3333
N/A	NC_042493.1	8632447	-	6.62677e-08	0.00168228	53.2387
CG42231-like	NC_042494.1	160564894	-	4.11888e-07	0.00538134	53.2143
sphingosine kinase 2-like	NC_042496.1	5526786	+	2.18063e-07	0.00356283	53.2051
protein daughterless-like	NC_042493.1	76624269	-	2.53112e-09	0.000261339	53.1915
uncharacterized LOC100159129	NC_042494.1	85880889	-	4.72291e-08	0.00141446	53.0005
N/A	NC_042494.1	51732042	+	7.65538e-07	0.00784969	52.6316
uncharacterized LOC100163981	NC_042493.1	68598412	+	8.06226e-07	0.00808028	52.4674
N/A	NC_042493.1	75643808	-	5.37764e-07	0.0063852	52.4333
uncharacterized LOC100167656	NC_042493.1	37032731	-	1.03372e-07	0.00225358	52.3573
DENN domain-containing protein 1A-like	NC_042495.1	75112053	+	2.47688e-08	0.00098466	52.2913
protein RIC1 homolog	NC_042495.1	73704145	+	3.96638e-08	0.00127462	52.2361
zinc finger protein 266-like	NC_042493.1	11640624	-	5.47071e-08	0.00154468	52.2222
N/A	NC_042496.1	42029888	-	7.93047e-10	0.000133356	52.1645
Coq3	NC_042494.1	125179227	-	2.04766e-07	0.00342075	52.1467
uncharacterized LOC100569603	NC_042494.1	48586582	+	1.59956e-07	0.00298772	52.1429
phosphorylated CTD-interacting factor 1-like	NC_042493.1	93096738	-	8.94929e-08	0.00205337	52.0745
neogenin-like	NC_042493.1	38357577	+	8.91049e-07	0.00857348	51.9744
uncharacterized LOC100569905	NC_042495.1	99019842	+	2.32082e-08	0.000939469	51.9565
uncharacterized LOC100571126	NC_042494.1	98222839	-	3.28607e-09	0.000301589	51.7864
DNA ligase 1-like	NC_042495.1	103415412	+	1.33435e-07	0.00268938	51.7857
uncharacterized LOC100168714	NC_042493.1	34689242	-	6.01977e-08	0.00158205	51.7672
N/A	NC_042494.1	170128839	-	1.09971e-07	0.0023628	51.7442
protein fem-1 homolog B-like	NC_042496.1	28590251	+	1.36984e-10	4.84926e-05	51.7045
uncharacterized LOC100160813	NC_042495.1	115310585	+	1.40018e-07	0.00277247	51.6917
uncharacterized LOC100163987	NC_042494.1	160903269	-	3.02702e-08	0.00108925	51.6807
N/A	NC_042495.1	1030427	+	1.57068e-06	0.0115723	51.6667
hemicentin-2-like	NC_042494.1	48055857	+	3.51583e-08	0.00121004	51.5723
uncharacterized LOC100166838	NC_042495.1	45574713	-	3.0395e-07	0.00440462	51.4815
zinc finger protein 665-like	NC_042495.1	93318730	+	3.43581e-07	0.00477418	51.4744
ACYPI53375	NC_042494.1	140434306	-	4.59746e-08	0.00140072	51.4464
uncharacterized protein LOC100302321	NC_042494.1	118163792	+	1.02144e-10	4.4667e-05	51.4406
carnitine O-palmitoyltransferase 1, liver isoform-like	NC_042494.1	159167822	-	2.89314e-07	0.00428396	51.3736
thrombospondin-3-like	NC_042494.1	103182271	+	1.31791e-09	0.000184856	51.3612
e3 SUMO-protein ligase PIAS1-like	NC_042493.1	1487497	+	3.9814e-08	0.00127462	51.3587
chromodomain-helicase-DNA-binding protein Mi-2 homolog	NC_042494.1	55968487	-	1.175e-08	0.000623291	51.3405
basement membrane-specific heparan sulfate proteoglycan core protein-like	NC_042495.1	97444081	-	1.79119e-08	0.000794395	51.3022
cysteine and histidine-rich protein 1 homolog	NC_042494.1	107473484	+	1.05412e-06	0.00936243	51.2987
# legumain & uncharacterized LOC100570989	NC_042493.1	4065401	+	8.91483e-07	0.00857348	51.29
protein Mo25-like	NC_042493.1	4584198	+	1.21117e-08	0.00062527	51.2516
PCI domain-containing protein 2-like	NC_042495.1	95112641	+	5.27248e-08	0.00151113	51.2247
N/A	NC_042496.1	20647200	+	9.37346e-09	0.00055746	51.2214
zinc finger protein 266-like	NC_042493.1	11640620	+	7.07259e-07	0.00758948	51.1905
leucine-rich repeat flightless-interacting protein 2-like	NC_042493.1	60881750	-	1.08539e-06	0.00950391	51.1307
N/A	NC_042495.1	18963323	-	5.2561e-08	0.00151113	51.1111
filamin-C-like	NC_042494.1	12468626	+	6.00761e-08	0.00158205	51.084
uncharacterized LOC100165888	NC_042495.1	49403932	-	4.33479e-06	0.0195857	50.976
uncharacterized LOC100569146	NC_042495.1	51422719	+	6.30933e-07	0.0069926	50.9756
ankyrin repeat domain-containing protein 11-like	NC_042495.1	36834809	-	5.22623e-07	0.00629038	50.9317
LOC107884547	NC_042495.1	102067623	-	1.43161e-07	0.00278969	50.9091
# putative leucine-rich repeat-containing protein DDB_G0290503 & putative leucine-rich repeat-containing protein DDB_G0290503	NC_042495.1	101443627	-	1.14255e-06	0.00971826	50.9009
possible pseudogene or miscRNA, No KEGG entry	NC_042493.1	11669167	-	1.50901e-06	0.0113313	50.8704
uncharacterized LOC100162352	NC_042493.1	21457934	-	1.99999e-08	0.000835278	50.8642
mitogen-activated protein kinase kinase kinase 15-like	NC_042495.1	107636028	-	8.24553e-10	0.000133356	50.8641
uncharacterized LOC100169397	NC_042493.1	28218304	+	9.44012e-08	0.00211389	50.8631
N/A	NC_042493.1	9751303	-	2.79692e-06	0.015728	50.8306
N/A	NC_042495.1	102337747	-	1.09461e-08	0.000602769	50.8242
transportin-1-like	NC_042494.1	51425422	-	1.44158e-07	0.00278969	50.7937
DNA-directed RNA polymerase III subunit RPC10-like	NC_042496.1	1783184	-	5.53102e-08	0.00154468	50.7692
uncharacterized LOC100167834	NC_042496.1	9365489	-	1.24217e-08	0.000636848	50.759
uncharacterized LOC100163803	NC_042496.1	37660704	+	8.34694e-09	0.000525859	50.737
protein strawberry notch-like	NC_042496.1	8563982	-	5.20833e-09	0.000390574	50.7143
tyrosine-protein phosphatase 99A-like	NC_042493.1	47953890	-	4.06355e-08	0.00127462	50.6579
RNA-binding protein-like	NC_042494.1	90599884	+	1.87365e-07	0.00323779	50.6279
annexin-B11-like	NC_042495.1	95071197	+	1.94156e-05	0.0436122	50.5991
LOC103310145	NC_042493.1	62012148	-	1.71867e-09	0.000212943	50.566
NF-kappa-B inhibitor-interacting Ras-like protein-like	NC_042496.1	15302721	+	1.20833e-08	0.00062527	50.5467
negative elongation factor E-like	NC_042494.1	154452906	+	1.85193e-08	0.000795795	50.4762
60S ribosomal protein L13a-like	NC_042495.1	86663982	-	4.10403e-08	0.00127655	50.4522
N/A	NC_042495.1	78021920	-	4.44912e-06	0.0198969	50.3968
N/A	NC_042496.1	42254742	-	3.81934e-06	0.0183063	50.3896
N/A	NC_042495.1	102067810	+	3.26125e-07	0.00462676	50.3846
N/A	NC_042494.1	78001001	-	4.5824e-07	0.00575433	50.3771
annexin-B11-like	NC_042495.1	95071179	+	6.3726e-06	0.0240356	50.3571
high mobility group protein 20A-like	NC_042493.1	62356104	-	5.92991e-08	0.00157439	50.3432
arf-GAP with coiled-coil, ANK repeat and PH domain-containing protein 3-like	NC_042493.1	89129059	-	5.27824e-07	0.00631894	50.3175
uncharacterized LOC100163308	NC_042494.1	53631728	+	5.78233e-07	0.00663364	50.3073
ATP-binding cassette sub-family G member 8-like	NC_042494.1	85494164	-	2.53899e-08	0.000986716	50.2976
# transmembrane 9 superfamily member 2 & uncharacterized LOC107884431	NC_042493.1	87500241	+	2.34626e-09	0.000258125	50.2938
vam6/Vps39-like protein-like	NC_042495.1	14921285	-	7.44907e-07	0.00775582	50.2273
Nap1l1	NC_042494.1	69103355	+	5.89041e-09	0.000413108	50.2024
cell division cycle protein 16 homolog	NC_042494.1	76877001	-	1.15298e-08	0.000616639	50.1784
pumilio domain-containing protein KIAA0020 homolog	NC_042493.1	34237998	+	1.05685e-08	0.000595876	50.0884
LOC103308958	NC_042493.1	81858616	-	1.06606e-08	0.000595876	50.0768
structural maintenance of chromosomes protein 3-like	NC_042493.1	68525260	+	5.57398e-08	0.00154468	50
uncharacterized LOC100164368	NC_042494.1	165050993	+	5.72861e-08	0.00155796	50
hemicentin-2-like	NC_042494.1	48055900	+	1.84576e-07	0.00320593	49.9033
ring canal kelch homolog	NC_042494.1	113463662	-	1.0325e-08	0.000593844	49.8758
uncharacterized LOC100165448	NC_042494.1	141260972	+	1.45065e-10	4.90191e-05	49.7895
N/A	NC_042493.1	34761575	-	6.03337e-07	0.00682415	49.7742
tetratricopeptide repeat protein 28-like	NC_042496.1	30291438	+	2.61266e-10	6.70065e-05	49.6914
zinc finger and BTB domain-containing protein 34-like	NC_042493.1	44979609	+	2.01099e-07	0.0033823	49.6855
uncharacterized LOC100572761	NC_042493.1	16651482	+	3.12968e-07	0.00448287	49.5986
uncharacterized LOC100569973	NC_042494.1	130982268	+	3.53026e-07	0.0048617	49.5847
d-glucuronyl C5-epimerase-like	NC_042493.1	59807355	+	5.53916e-08	0.00154468	49.5833
LOC100163013	NC_042494.1	165430409	+	1.63084e-07	0.00302114	49.5614
# proton channel OtopLc-like & collagen alpha-5(IV) chain	NC_042493.1	31528455	-	5.42835e-07	0.00642349	49.5356
LOC115033147	NC_042493.1	67942438	-	1.054e-07	0.0022844	49.5098
uncharacterized LOC100573976	NC_042495.1	107625669	+	1.03847e-08	0.000593844	49.5098
uncharacterized LOC100574890	NC_042494.1	137019382	+	1.04668e-11	6.4842e-06	49.4749
N/A	NC_042494.1	56699161	+	1.4428e-07	0.00278969	49.4048
N/A	NC_042493.1	47817963	+	5.5618e-09	0.000393777	49.3811
uncharacterized protein C2orf47 homolog, mitochondrial-like	NC_042495.1	79922514	+	6.98371e-08	0.00173057	49.3543
N/A	NW_021770006.1	36205	-	1.09554e-06	0.00953662	49.3369
ATP-binding cassette sub-family F member 1-like	NC_042494.1	96663996	-	1.79419e-07	0.00316068	49.3347
DNA primase large subunit-like	NC_042493.1	35022947	-	4.98407e-08	0.00147031	49.3056
apoptotic protease-activating factor 1-like	NC_042495.1	67724797	-	4.09781e-08	0.00127655	49.3033
uncharacterized LOC100161391	NC_042493.1	34158098	-	2.12446e-07	0.00350867	49.2653
homeodomain-interacting protein kinase 2-like	NC_042494.1	94838844	-	1.74054e-07	0.00313883	49.2593
myotubularin-related protein 13-like	NC_042494.1	153708225	-	3.6765e-07	0.00496931	49.2172
copper homeostasis protein cutC homolog	NC_042493.1	57663650	-	4.84119e-07	0.00597833	49.2063
LOC103309622	NC_042495.1	90392671	+	1.94198e-06	0.013006	49.1667
abhydrolase domain-containing protein 4-like	NC_042495.1	51415361	+	6.49049e-10	0.000126975	49.1341
condensin complex subunit 1-like	NC_042494.1	134682031	+	2.56403e-08	0.000986716	49.0839
uncharacterized LOC100570440	NC_042493.1	72467744	-	4.18901e-07	0.0054119	49.053
uncharacterized LOC100164911	NC_042495.1	112047419	+	1.13481e-06	0.00967451	49.0374
N/A	NW_021770267.1	4070	-	3.82681e-06	0.0183303	49.0365
UDP-GlcNAc:betaGal beta-1,3-N-acetylglucosaminyltransferase 5-like	NC_042494.1	148247448	+	9.98403e-07	0.00906245	49.0271
uncharacterized LOC100574987	NC_042494.1	65259958	-	2.33648e-08	0.000939469	48.9964
uncharacterized LOC100169281	NC_042494.1	157799515	-	5.97331e-06	0.0233001	48.9629
LOC103310145	NC_042493.1	62012140	-	1.82627e-08	0.000795795	48.9474
# uncharacterized LOC107884138 & uncharacterized LOC100167890	NC_042493.1	70302686	+	1.00121e-08	0.000583269	48.9362
insulin-like receptor-like	NC_042495.1	43530488	-	7.37989e-07	0.00773797	48.9167
DNA replication factor Cdt1-like	NC_042494.1	72576610	+	3.76041e-06	0.0182459	48.913
pyruvate carboxylase, mitochondrial-like	NC_042494.1	122975000	+	1.73475e-06	0.012336	48.8462
uncharacterized LOC100158742	NC_042496.1	33423792	-	3.27843e-08	0.00114962	48.8147
glycerol-3-phosphate acyltransferase 4-like	NC_042494.1	37947837	+	1.0117e-06	0.00912744	48.8038
LOC103311903	NC_042493.1	37853210	+	1.48191e-06	0.0113213	48.7794
UDP-GlcNAc:betaGal beta-1,3-N-acetylglucosaminyltransferase 5-like	NC_042494.1	148247432	+	3.47999e-07	0.00481334	48.7345
phytanoyl-CoA dioxygenase, peroxisomal-like	NC_042495.1	97993473	-	5.76808e-06	0.0228979	48.7013
N/A	NC_042495.1	87915480	+	3.79697e-06	0.0182697	48.6696
uncharacterized LOC100163803	NC_042496.1	37677316	+	1.72851e-08	0.000783522	48.6683
uncharacterized LOC100161169	NC_042496.1	36991462	+	2.13372e-07	0.00350931	48.6587
pre-mRNA-processing factor 6-like	NC_042494.1	142395317	+	1.96237e-05	0.0438482	48.6447
zinc finger protein 224-like	NC_042495.1	77040929	+	6.01262e-07	0.0068204	48.6206
dual specificity protein phosphatase 7-like	NC_042494.1	85481445	-	8.25175e-10	0.000133356	48.6111
tyrosine-protein phosphatase non-receptor type 4-like	NC_042493.1	68568068	+	5.87001e-08	0.0015697	48.5455
protein unc-79 homolog	NC_042495.1	92482483	+	1.19289e-05	0.0340733	48.5366
uncharacterized LOC100161640	NC_042495.1	44079452	-	2.15181e-06	0.0137899	48.4878
u11/U12 small nuclear ribonucleoprotein 35 kDa protein-like	NC_042493.1	42982391	+	8.39312e-07	0.00827515	48.4848
dnaJ homolog subfamily C member 17-like	NC_042493.1	95872896	-	5.67988e-07	0.006577	48.4246
sodium leak channel non-selective protein-like	NC_042496.1	36606773	-	4.27388e-06	0.019504	48.4127
# G-protein-signaling modulator 2 & ubiquinone biosynthesis protein COQ4 homolog, mitochondrial	NC_042494.1	152518261	+	5.08689e-08	0.00148298	48.3916
menin-like	NC_042494.1	69079705	-	1.35953e-07	0.0027242	48.366
uncharacterized LOC100160594	NC_042495.1	11453645	-	1.86164e-06	0.0128143	48.3349
LOC103312028	NC_042495.1	110740797	-	5.17681e-09	0.000390574	48.2945
rho GTPase-activating protein 12-like	NC_042495.1	112032606	-	2.20463e-06	0.0139073	48.2927
N/A	NC_042496.1	33423094	+	1.44475e-07	0.00278969	48.2684
uncharacterized protein K02A2.6-like	NC_042493.1	57842366	-	2.75919e-07	0.0041522	48.2682
uncharacterized LOC100169459	NC_042493.1	36918243	+	1.79524e-08	0.000794395	48.2252
# rho guanine nucleotide exchange factor 18 & rho guanine nucleotide exchange factor 28-like	NC_042496.1	19311088	-	2.70298e-06	0.0155409	48.2143
N/A	NC_042495.1	115267660	-	3.84048e-09	0.000328702	48.1818
uncharacterized LOC100159476	NC_042493.1	66437196	-	2.38694e-06	0.0145567	48.1313
N/A	NC_042495.1	58053053	-	2.39176e-06	0.0145622	48.1061
DNA mismatch repair protein Msh6-like	NC_042495.1	49197036	-	2.09783e-06	0.0135417	48.0902
N/A	NC_042495.1	1029818	-	1.05914e-06	0.0093846	48.0851
N/A	NC_042493.1	3067300	-	5.51689e-07	0.00645869	48.0769
ring canal kelch homolog	NC_042495.1	23353183	-	6.58499e-07	0.00720957	48.0519
N/A	NC_042495.1	102071522	-	8.84088e-06	0.0289275	48.048
uncharacterized LOC100168960	NC_042493.1	91935170	+	6.62697e-06	0.0246741	48.0392
uncharacterized LOC100168539	NC_042494.1	41148338	+	7.11771e-06	0.0257192	48.0342
uncharacterized LOC100301917	NC_042495.1	1848390	-	7.77128e-06	0.0270594	48.0159
mini-chromosome maintenance complex-binding protein-like	NC_042495.1	56135702	-	2.62799e-08	0.000993255	48.0159
surfeit locus protein 4 homolog	NC_042496.1	33530235	+	1.27016e-07	0.00260121	47.9814
N/A	NC_042493.1	83501786	+	2.80192e-06	0.0157388	47.9717
intraflagellar transport protein 122 homolog	NC_042494.1	85730495	+	1.38304e-09	0.000186938	47.9626
uncharacterized LOC100575183	NC_042495.1	40972282	-	2.91935e-06	0.0160403	47.9592
ribosomal protein L10Ae-like	NC_042494.1	130398554	+	9.86459e-07	0.00904042	47.9466
# uncharacterized LOC100575208 & uncharacterized LOC100575036	NC_042495.1	43150957	+	2.70775e-07	0.00409969	47.9378
uncharacterized LOC100569092	NC_042495.1	101426059	+	3.89952e-08	0.00127462	47.9328
uncharacterized LOC100161660	NC_042494.1	84249165	-	3.37223e-07	0.00473004	47.9288
cation-independent mannose-6-phosphate receptor-like	NC_042495.1	103879897	-	5.28507e-08	0.00151113	47.9112
tyrosine-protein kinase transmembrane receptor Ror2-like	NC_042493.1	57875960	-	4.48656e-08	0.00137823	47.8974
possible pseudogene or miscRNA, No KEGG entry	NC_042496.1	38305611	+	1.99552e-06	0.0131911	47.8836
N/A	NC_042494.1	122404655	+	2.34579e-06	0.0143883	47.8831
histone acetyltransferase type B catalytic subunit-like	NC_042493.1	71522237	-	2.55314e-08	0.000986716	47.8663
ATP-binding cassette sub-family F member 1-like	NC_042494.1	96663948	-	1.91878e-06	0.0129632	47.7778
uncharacterized LOC100164056	NC_042494.1	119437502	+	1.55683e-11	8.90268e-06	47.7637
N/A	NC_042494.1	78263603	-	4.82469e-08	0.00143468	47.7477
cell division cycle 7-related protein kinase-like	NC_042495.1	42811494	+	1.7437e-07	0.00313883	47.7403
N/A	NC_042493.1	36900277	+	1.55113e-06	0.0115081	47.7389
N/A	NC_042493.1	87568592	-	1.18637e-07	0.00247044	47.7319
uncharacterized LOC100570154	NC_042494.1	116371104	+	1.93117e-06	0.0129718	47.7273
uncharacterized LOC100162838	NC_042496.1	33478114	+	3.5469e-08	0.00121451	47.7273
uncharacterized LOC100158844	NC_042495.1	102729443	-	4.81088e-07	0.0059607	47.7241
uncharacterized LOC100570992	NC_042495.1	65602997	-	1.16649e-07	0.00245574	47.7222
uncharacterized LOC100572787	NC_042493.1	68959257	+	9.03636e-09	0.000555178	47.7151
acetyl-CoA acetyltransferase, cytosolic-like	NC_042496.1	40221006	-	5.47087e-07	0.00642505	47.6847
uncharacterized LOC100161223	NC_042495.1	107498530	-	5.74144e-08	0.00155796	47.6552
uncharacterized LOC100168266	NC_042495.1	50378794	-	6.58576e-06	0.024553	47.5891
e3 ubiquitin-protein ligase RNF19A-like	NC_042495.1	67821653	+	6.38975e-08	0.00164005	47.5777
myotrophin-like	NC_042493.1	70474688	+	8.2145e-06	0.0278778	47.549
uncharacterized LOC100159378	NC_042494.1	28560948	-	4.86584e-06	0.0208129	47.5452
uncharacterized LOC100162005	NC_042493.1	60320716	-	1.12622e-06	0.00963857	47.5
LOC100168908	NC_042494.1	110327089	+	3.66562e-06	0.0180227	47.5
N/A	NC_042494.1	152917621	+	7.40061e-09	0.000474795	47.5
protein held out wings-like	NC_042496.1	9435838	+	2.25594e-07	0.00364581	47.4528
uncharacterized LOC100571586	NC_042494.1	16161071	+	9.77076e-07	0.00900481	47.451
LOC100158926	NC_042495.1	71980055	+	2.33793e-08	0.000939469	47.4426
protein unc-79 homolog	NC_042495.1	92471960	+	3.39295e-07	0.00473232	47.425
nuclear RNA export factor 1-like	NC_042494.1	167577868	+	1.24867e-06	0.0102729	47.4206
elongation of very long chain fatty acids protein AAEL008004-like	NC_042496.1	36239272	-	6.73963e-08	0.00168228	47.4026
N/A	NC_042495.1	66549879	+	2.44221e-06	0.014677	47.3333
# mitochondrial cardiolipin hydrolase & uncharacterized LOC107884934	NC_042493.1	89879647	-	5.90853e-07	0.00676797	47.3296
electron transfer flavoprotein-ubiquinone oxidoreductase, mitochondrial-like	NC_042494.1	13696393	+	5.81904e-06	0.022994	47.3275
splicing factor 3A subunit 1-like	NC_042494.1	56441955	+	1.94052e-07	0.00329358	47.3214
WD and tetratricopeptide repeats protein 1-like	NC_042495.1	63219070	-	5.33182e-07	0.00636226	47.3118
uncharacterized LOC100572153	NC_042496.1	9845536	-	5.44009e-07	0.00642349	47.3007
supervillin-like	NC_042494.1	70342971	-	5.62169e-06	0.0225901	47.2691
dihydroxyacetone phosphate acyltransferase-like	NC_042493.1	68501230	+	5.94514e-07	0.00678898	47.2619
uncharacterized LOC100159378	NC_042494.1	28563146	+	3.43055e-07	0.00477418	47.2569
ceramide glucosyltransferase-like	NC_042493.1	79469749	-	1.78999e-07	0.00316068	47.2515
uncharacterized LOC100163781	NC_042494.1	89211450	+	3.88187e-06	0.0184513	47.2222
# stress-70 protein, mitochondrial & ran GTPase-activating protein 1	NC_042495.1	68724285	-	1.12218e-08	0.000604515	47.2191
cystathionine beta-synthase-like	NC_042493.1	68074557	+	2.32293e-07	0.0037217	47.2097
uncharacterized LOC100167514	NC_042493.1	75634132	-	3.60932e-06	0.0178843	47.1828
cytoskeleton-associated protein 5-like	NC_042495.1	116117312	-	2.15112e-07	0.00353013	47.1759
LOC107884318	NC_042494.1	108632460	-	8.51438e-07	0.00836042	47.1326
DNA-dependent protein kinase catalytic subunit-like	NC_042494.1	73774851	+	2.3829e-06	0.0145559	47.1163
cysteine desulfurase, mitochondrial-like	NC_042495.1	109315557	+	2.3829e-06	0.0145559	47.1163
DNA polymerase epsilon catalytic subunit A-like	NC_042496.1	36648596	+	1.23806e-06	0.0102374	47.0769
WW domain-binding protein 2-like	NC_042495.1	106877317	+	3.37395e-06	0.0172385	47.068
tyrosine-protein phosphatase 99A-like	NC_042493.1	47943757	+	1.07502e-06	0.00945762	47.0588
# transmembrane 9 superfamily member 2 & uncharacterized LOC107884431	NC_042493.1	87498197	+	6.71108e-06	0.0248334	47.047
# ring canal kelch homolog & ring canal kelch homolog	NC_042494.1	168697071	+	2.97013e-06	0.0161706	47.0109
laminin subunit alpha-1-like	NC_042493.1	13330687	+	1.78167e-07	0.00316068	47.0018
possible pseudogene or miscRNA, No KEGG entry	NC_042493.1	14679210	-	3.61277e-07	0.00490994	46.9697
N/A	NC_042495.1	102010936	+	1.98885e-06	0.0131911	46.9444
neogenin-like	NC_042493.1	38360698	-	6.44734e-07	0.00709019	46.9373
ankyrin-2-like	NC_042494.1	69870173	-	1.27443e-05	0.0351884	46.929
uncharacterized LOC100166553	NC_042494.1	148102275	-	1.68794e-08	0.000769828	46.9231
uncharacterized LOC100160811	NC_042494.1	152691781	-	6.20383e-07	0.006944	46.8873
uncharacterized LOC100575099	NC_042495.1	25409323	+	6.17686e-07	0.00692593	46.8841
vascular endothelial growth factor receptor 1-like	NC_042494.1	45036937	-	3.92127e-08	0.00127462	46.8832
abhydrolase domain-containing protein 2-like	NC_042493.1	80799987	-	9.58666e-06	0.0302961	46.8785
LOC107884661	NC_042496.1	2334957	-	1.02705e-06	0.00921001	46.8706
neuroendocrine protein 7B2-like	NC_042496.1	30992722	-	2.70186e-07	0.00409911	46.8694
cation-independent mannose-6-phosphate receptor-like	NC_042495.1	103876371	+	2.63982e-06	0.0153913	46.8641
N/A	NC_042495.1	102176580	+	7.18437e-06	0.0258638	46.7949
negative elongation factor B-like	NC_042496.1	25001998	+	7.1294e-07	0.00758948	46.7925
# protein UXT homolog & KICSTOR complex protein kaptin	NC_042494.1	163540671	+	1.31101e-08	0.000649739	46.7861
piwi-like protein 2-like	NC_042493.1	53276256	+	2.64454e-07	0.00404518	46.7458
N/A	NC_042495.1	80591657	+	4.70104e-09	0.000375781	46.7023
s-adenosylmethionine mitochondrial carrier protein-like	NC_042495.1	43716284	+	8.57218e-07	0.00838497	46.6667
putative glutamate synthase [NADPH]-like	NC_042494.1	51278383	+	1.15379e-06	0.00976914	46.645
myotubularin-related protein 8-like	NC_042494.1	55766701	-	1.35336e-05	0.0362163	46.645
transcription factor E2F2-like	NC_042494.1	142178216	+	1.87671e-06	0.0128585	46.6284
mRNA-capping enzyme-like	NC_042496.1	32730971	-	5.70997e-07	0.00659132	46.6026
N/A	NC_042494.1	89195354	+	1.58432e-05	0.0392101	46.6026
pleckstrin homology domain-containing family M member 1-like	NC_042493.1	72094910	-	1.64802e-05	0.0399636	46.5781
probable ATP-dependent RNA helicase DDX46-like	NC_042496.1	34886527	-	1.1549e-07	0.00244604	46.5641
transcription initiation factor TFIID subunit 1-like	NC_042494.1	110044030	-	3.42532e-06	0.017346	46.558
NFX1-type zinc finger-containing protein 1-like	NC_042494.1	134661953	-	1.59496e-08	0.000731912	46.5455
uncharacterized LOC100575496	NC_042494.1	115305146	-	1.3676e-06	0.0108736	46.5221
trans-1,2-dihydrobenzene-1,2-diol dehydrogenase-like	NC_042495.1	77954420	+	1.60279e-06	0.011716	46.4978
uncharacterized LOC100162107	NC_042494.1	145022831	+	1.18151e-07	0.00246724	46.4894
N/A	NC_042493.1	36707310	-	2.07686e-06	0.0134725	46.4531
N/A	NC_042493.1	3366659	+	1.98002e-06	0.0131777	46.4286
Sni	NC_042494.1	169531586	-	6.03421e-08	0.00158205	46.4103
uncharacterized LOC100569986	NC_042495.1	2935176	+	5.02956e-06	0.0212015	46.3889
LOC100168357	NC_042495.1	77995722	+	3.20645e-07	0.00457521	46.3523
low-density lipoprotein receptor-related protein 5-like	NC_042493.1	29345473	-	5.94565e-06	0.0232755	46.3415
microspherule protein 1-like	NC_042494.1	120080879	+	2.36518e-07	0.00376479	46.3024
plexin-B-like	NC_042493.1	84494582	-	3.65779e-06	0.0180045	46.2712
N/A	NC_042493.1	60457958	-	1.48262e-06	0.0113213	46.2693
poly(rC)-binding protein 3-like	NC_042494.1	55861569	-	1.34023e-08	0.000659823	46.2231
protein dispatched-like	NC_042495.1	104384812	-	2.75807e-06	0.0156682	46.1905
uncharacterized LOC100570440	NC_042493.1	72467732	-	3.94413e-07	0.0052114	46.1871
thrombospondin-3-like	NC_042494.1	103182175	-	2.92373e-06	0.0160406	46.1572
uncharacterized LOC100161826	NC_042495.1	76576009	+	1.14916e-06	0.00975215	46.1509
uncharacterized LOC100166566	NC_042494.1	117756726	+	1.10314e-05	0.0325747	46.1364
N/A	NC_042495.1	106742899	+	2.95336e-07	0.00429654	46.1234
putative glycerophosphocholine phosphodiesterase GPCPD1-like	NC_042493.1	10019744	-	6.29016e-07	0.00698971	46.117
rho-associated protein kinase 2-like	NC_042493.1	44403262	-	1.57585e-05	0.0390888	46.0981
uncharacterized protein KIAA0528 homolog	NC_042495.1	92524977	-	2.24728e-06	0.014059	46.0857
mediator of RNA polymerase II transcription subunit 23-like	NC_042494.1	45472158	+	4.69528e-06	0.0204002	46.082
N/A	NC_042494.1	16357809	-	3.89502e-07	0.00517066	46.0784
DNA mismatch repair protein Mlh1-like	NC_042495.1	83679916	-	1.76841e-05	0.041497	46.0784
DCN1-like protein 3-like	NC_042494.1	26649236	-	1.64957e-06	0.0119173	46.0754
uncharacterized LOC100160854	NC_042493.1	67887675	-	1.48064e-05	0.0378121	46.0643
uncharacterized LOC100570926	NC_042493.1	42969453	+	9.48334e-06	0.0301537	46.0606
uncharacterized LOC100575022	NC_042493.1	21481971	-	2.74156e-06	0.0156535	46.0474
WD repeat-containing protein 59-like	NC_042495.1	56017454	+	3.891e-09	0.000328702	46.0407
uncharacterized protein LOC100162758	NC_042495.1	1782928	-	3.48592e-06	0.0174743	46.0222
uncharacterized LOC100573273	NC_042495.1	95963394	+	2.34361e-05	0.0476937	46.003
RNA-binding protein 28-like	NC_042494.1	130390318	-	6.03423e-06	0.0234126	45.9733
ectoderm-neural cortex protein 2-like	NC_042493.1	58336226	+	5.49464e-07	0.00644279	45.9686
protein bicaudal C homolog 1-like	NC_042494.1	78290713	+	2.95015e-07	0.00429654	45.9596
LOC115034022	NC_042495.1	97571401	-	1.72368e-06	0.0123092	45.9574
uncharacterized LOC100570073	NC_042494.1	28492649	-	5.64409e-06	0.0226556	45.9559
uncharacterized LOC100302105	NC_042495.1	81197731	-	4.64427e-07	0.00579962	45.9281
N/A	NC_042493.1	66612429	+	5.31072e-09	0.000390891	45.9184
ATP-binding cassette sub-family F member 1-like	NC_042494.1	96663968	-	2.13625e-06	0.013726	45.9091
N/A	NC_042494.1	9403081	-	3.19754e-06	0.0168114	45.874
uncharacterized LOC100169235	NC_042494.1	39808731	-	1.44468e-07	0.00278969	45.8437
glycerol kinase-like	NC_042493.1	78619687	+	1.22918e-06	0.0101937	45.8333
# tRNA dimethylallyltransferase & tRNA dimethylallyltransferase	NC_042494.1	367793	+	7.83976e-07	0.00791861	45.8333
uncharacterized LOC100569905	NC_042495.1	99007701	+	1.24191e-07	0.00257462	45.8333
ras suppressor protein 1-like	NC_042494.1	76886286	+	2.91603e-06	0.0160369	45.8227
endoplasmic reticulum resident protein 44-like	NC_042495.1	107206082	-	3.62311e-06	0.0179301	45.8227
calpain-A-like	NC_042493.1	10089544	+	4.05134e-06	0.0189301	45.812
N/A	NC_042494.1	113911177	-	1.86399e-05	0.0425713	45.812
N/A	NC_042494.1	113911181	-	1.3596e-05	0.0362658	45.7609
N/A	NC_042493.1	54500873	-	2.2679e-07	0.00365198	45.7527
DEP domain-containing protein 5-like	NC_042493.1	157613	-	1.25575e-05	0.0350265	45.742
CG17180-like	NC_042495.1	12941238	+	9.55955e-06	0.0302924	45.7404
LOC100168908	NC_042494.1	110330658	-	1.8903e-06	0.0128898	45.7391
uncharacterized LOC100165398	NC_042493.1	74752712	-	6.93793e-07	0.00751847	45.7364
N/A	NC_042495.1	102197141	+	5.74291e-07	0.00660881	45.7313
LOC107884544	NC_042495.1	102028587	-	1.09665e-05	0.0324802	45.6996
glutamate receptor delta-2 subunit-like	NC_042493.1	89313109	-	3.71572e-06	0.0181371	45.6989
fasciculation and elongation protein zeta-2-like	NC_042494.1	141271423	+	1.89314e-07	0.00325027	45.6972
N/A	NC_042494.1	55745168	+	1.36343e-05	0.03635	45.6861
cohesin subunit SA-1-like	NC_042495.1	77950077	+	7.09111e-08	0.00175134	45.6829
activating signal cointegrator 1-like	NC_042494.1	149376806	+	7.40841e-08	0.00179523	45.6818
# legumain & uncharacterized LOC100570989	NC_042493.1	4065370	+	7.36449e-06	0.0261576	45.6289
cytohesin-1-like	NC_042494.1	100840091	-	7.13537e-07	0.00758948	45.6261
protein bicaudal C homolog 1-like	NC_042494.1	78291232	+	3.32088e-06	0.0170966	45.625
N/A	NC_042494.1	82435654	+	2.2802e-06	0.0141613	45.614
epidermal growth factor receptor kinase substrate 8-like	NC_042493.1	47926626	+	2.36718e-06	0.0144837	45.5882
biotin--protein ligase-like	NC_042495.1	93021984	+	7.14716e-07	0.00758948	45.5744
Mrps28	NC_042494.1	90439301	-	1.25774e-07	0.00258632	45.5462
LOC115033169	NC_042493.1	85408526	+	1.73619e-05	0.0411047	45.522
uncharacterized LOC100166850	NC_042495.1	43627799	+	1.98998e-06	0.0131911	45.5197
uncharacterized LOC100169179	NC_042494.1	76788845	-	1.51241e-07	0.0028829	45.5128
# lysine-specific demethylase 3A & uncharacterized LOC100575399	NC_042493.1	71711870	-	5.77739e-07	0.00663364	45.5069
possible pseudogene or miscRNA, No KEGG entry	NC_042496.1	4704705	+	1.02483e-06	0.00921001	45.4953
N/A	NC_042496.1	42029903	-	7.4449e-07	0.00775582	45.4854
ecto-NOX disulfide-thiol exchanger 1-like	NC_042494.1	110239802	-	9.1642e-06	0.0295177	45.4787
N/A	NC_042495.1	50804827	-	1.62783e-06	0.0117947	45.4701
uncharacterized protein LOC100302321	NC_042494.1	118157396	+	1.25501e-06	0.0102734	45.4589
WASH complex subunit strumpellin-like	NC_042495.1	44861264	-	2.09253e-06	0.0135386	45.4545
ribosomal protein L31	NC_042495.1	115765638	+	1.17315e-06	0.00988804	45.4545
zinc finger protein 271-like	NC_042494.1	125057027	-	7.1789e-06	0.0258566	45.4419
elongation factor Tu, mitochondrial-like	NC_042495.1	69574168	+	9.28662e-06	0.0297808	45.4173
N/A	NC_042496.1	20822697	+	1.18736e-05	0.0339755	45.3968
uncharacterized LOC100575168	NC_042493.1	34760592	+	2.46291e-06	0.0147537	45.3818
uncharacterized LOC100160660	NC_042495.1	104006685	-	1.44837e-05	0.0374583	45.3659
uncharacterized LOC100162043	NC_042494.1	160486041	+	2.1858e-05	0.0461166	45.3571
N/A	NC_042493.1	36900278	-	3.01693e-07	0.00438045	45.3252
N/A	NC_042494.1	152423396	-	2.53918e-06	0.0150493	45.2991
ubiquitin-protein ligase E3A-like	NC_042495.1	5700814	-	9.20225e-08	0.00209414	45.2851
UPF0534 protein C4orf43 homolog	NC_042495.1	60260737	-	1.95851e-06	0.0130697	45.283
phosphatidylinositol-4-phosphate 5-kinase type-1 alpha-like	NC_042495.1	49025208	+	3.82315e-07	0.00510434	45.2778
peroxisome biogenesis factor 1-like	NC_042493.1	70973988	+	6.76144e-06	0.0249082	45.2381
uncharacterized LOC100570911	NC_042493.1	72103863	-	1.23695e-05	0.0347524	45.2381
2-hydroxyacyl-CoA lyase 1-like	NC_042494.1	128449949	-	5.14325e-06	0.0215045	45.2381
neurocalcin homolog	NC_042495.1	37632465	+	1.17219e-05	0.0336972	45.2381
protein hu-li tai shao-like	NC_042493.1	78146012	+	1.4801e-06	0.0113213	45.2373
# neuroblastoma-amplified sequence & proteasome subunit beta type 7,10-like	NC_042494.1	23443526	-	2.07255e-07	0.00344685	45.2288
sorting nexin-9-like	NC_042493.1	16017079	-	7.97436e-11	3.9521e-05	45.2201
N/A	NC_042496.1	42058379	+	8.68572e-06	0.0287058	45.2119
WD repeat-containing protein 48 homolog	NC_042496.1	34875347	+	4.30273e-10	9.13903e-05	45.1956
transaldolase-like	NC_042496.1	25849241	-	5.9221e-06	0.0232604	45.1892
uncharacterized LOC100159061	NC_042495.1	90344613	-	1.46558e-06	0.0112944	45.1857
CG3893-like	NC_042493.1	76922093	+	3.69041e-07	0.00497905	45.1786
uncharacterized LOC100163211	NC_042494.1	85952191	+	2.81633e-07	0.0042126	45.1754
protein FAM73B-like	NC_042493.1	120491398	+	8.26663e-06	0.0279719	45.1682
N/A	NC_042495.1	92277686	+	6.76623e-08	0.00168228	45.1632
AP-1 complex subunit sigma-2-like	NC_042495.1	1520486	-	5.11228e-06	0.0214353	45.1546
uncharacterized LOC100574987	NC_042494.1	65190782	-	1.46201e-07	0.00281569	45.1439
protein tumorous imaginal discs, mitochondrial-like	NC_042493.1	29484397	+	5.4005e-06	0.0221572	45.137
probable 28S ribosomal protein S6, mitochondrial-like	NC_042494.1	32503176	+	1.77006e-06	0.0124783	45.122
bifunctional aminoacyl-tRNA synthetase-like	NC_042493.1	29673502	-	4.95406e-06	0.0210209	45.1083
# 3-oxoacyl-[acyl-carrier-protein] synthase, mitochondrial & Mlst8	NC_042495.1	66472338	+	1.77576e-05	0.0415458	45.0794
probable E3 ubiquitin-protein ligase RNF144A-A-like	NC_042495.1	85880815	-	3.68088e-06	0.0180769	45.0742
RNA binding motif protein 34	NC_042493.1	89188526	+	6.80529e-07	0.00739629	45.07
glutathione S-transferase, theta class-like	NC_042495.1	107379964	+	4.46865e-06	0.019952	45.0457
dual specificity tyrosine-phosphorylation-regulated kinase 2-like	NC_042493.1	90552895	-	7.9155e-08	0.00186806	45.0292
LOC107884318	NC_042494.1	108632493	-	1.77346e-06	0.0124783	45.0269
leucine-rich repeat serine/threonine-protein kinase 1-like	NC_042495.1	78932884	+	1.59767e-06	0.0117045	45.0168
sphingomyelin phosphodiesterase-like	NC_042494.1	46785982	+	1.57747e-06	0.0116109	45.0136
72 kDa inositol polyphosphate 5-phosphatase-like	NC_042495.1	71973273	+	7.47031e-08	0.00179723	45.0029
uncharacterized LOC100573350	NC_042494.1	93808708	-	1.508e-06	0.0113313	44.9702
uncharacterized LOC100165794	NC_042494.1	85836375	-	4.03067e-07	0.00528467	44.9554
uncharacterized LOC100163498	NC_042494.1	118025212	+	6.96342e-06	0.0254201	44.9468
poly [ADP-ribose] polymerase 12-like	NC_042495.1	94188501	-	7.96827e-07	0.0080049	44.9301
low-density lipoprotein receptor-related protein 1-like	NC_042494.1	3271689	+	2.11152e-06	0.0136023	44.9173
prolow-density lipoprotein receptor-related protein 1-like	NC_042494.1	153555396	-	5.68827e-06	0.0227479	44.914
NADH dehydrogenase [ubiquinone] 1 beta subcomplex subunit 9-like	NC_042494.1	17736685	-	1.07236e-06	0.0094556	44.9049
alanyl-tRNA synthetase, cytoplasmic-like	NC_042495.1	106833846	-	2.67615e-09	0.000268428	44.898
pre-mRNA-processing factor 39-like	NC_042495.1	110889345	-	1.25757e-06	0.0102734	44.8914
eukaryotic translation initiation factor 1A-like	NC_042496.1	32826009	-	3.06124e-07	0.00440932	44.8901
microtubule-actin cross-linking factor 1, isoforms 1/2/3/5-like	NC_042495.1	45119806	+	6.19584e-08	0.00159931	44.8826
sodium leak channel non-selective protein-like	NC_042496.1	36606855	-	1.15837e-05	0.0334033	44.8718
putative glutamate synthase [NADPH]-like	NC_042494.1	51277243	-	2.76115e-06	0.0156682	44.8542
N/A	NC_042496.1	35123781	-	6.66913e-08	0.00168228	44.8293
zinc finger and SCAN domain-containing protein 2-like	NC_042493.1	81812933	+	3.06647e-07	0.00440932	44.7917
uncharacterized LOC100166146	NC_042494.1	98169905	-	1.36609e-06	0.0108732	44.7917
uncharacterized LOC100572541	NC_042493.1	95359104	-	2.15106e-06	0.0137899	44.7843
protein KRI1 homolog	NC_042494.1	127319197	+	3.41241e-06	0.0173398	44.7619
spermatogenesis-associated protein 5-like	NC_042494.1	155660229	-	1.01187e-05	0.0312515	44.7619
histone acetyltransferase KAT2B-like	NC_042493.1	51919332	+	4.47378e-06	0.0199629	44.7611
protein son of sevenless-like	NC_042495.1	85747025	-	6.07688e-06	0.0234885	44.7568
N/A	NC_042493.1	8633896	-	1.13243e-07	0.00241217	44.749
uncharacterized LOC100168597	NC_042493.1	9756058	-	2.34557e-06	0.0143883	44.7468
microspherule protein 1-like	NC_042494.1	120080894	+	3.03897e-06	0.0163827	44.7458
prolow-density lipoprotein receptor-related protein 1-like	NC_042494.1	153559071	-	4.15554e-07	0.00540076	44.7458
hamartin-like	NC_042495.1	65741928	-	2.62048e-05	0.0498819	44.74
probable protein phosphatase CG10417-like	NC_042493.1	122221272	+	1.53365e-06	0.011424	44.7197
# Ctsk1 & group XV phospholipase A2	NC_042493.1	87280151	+	5.32198e-07	0.00636073	44.697
N/A	NC_042495.1	102250186	-	1.03867e-05	0.0316455	44.6394
dystrophin, isoforms A/C/F/G/H-like	NC_042496.1	8413243	+	1.24336e-06	0.0102544	44.6382
uncharacterized LOC100163212	NC_042495.1	111173225	-	1.11068e-09	0.000165136	44.6272
N/A	NC_042496.1	31770491	-	2.62088e-07	0.00402555	44.6212
N/A	NC_042494.1	153054503	-	3.10675e-06	0.0165441	44.6145
reticulocalbin-2-like	NC_042493.1	70144782	+	6.3518e-06	0.0239936	44.5971
serine/threonine-protein kinase PAK 7-like	NC_042494.1	69910182	-	1.61907e-06	0.0117657	44.5921
calcium-independent protein kinase C-like	NC_042493.1	57762194	+	5.13308e-07	0.00621489	44.5887
uncharacterized LOC100574325	NC_042493.1	103893622	-	1.07351e-06	0.0094556	44.5578
f-box/WD repeat-containing protein 7-like	NC_042494.1	109992088	+	8.41836e-06	0.0282431	44.5344
anaphase-promoting complex subunit 4-like	NC_042496.1	5979928	+	3.15351e-06	0.0166619	44.5287
N/A	NC_042494.1	131698823	+	1.31101e-06	0.0105592	44.521
neurocalcin homolog	NC_042495.1	37631595	-	1.31101e-06	0.0105592	44.521
uncharacterized LOC100568642	NC_042493.1	79872095	+	1.06168e-05	0.0319665	44.5193
N/A	NC_042495.1	48631627	+	4.08493e-07	0.00534639	44.5188
# uncharacterized LOC100572851 & uncharacterized LOC107884486	NC_042494.1	168190226	+	5.14996e-06	0.0215105	44.5098
uncharacterized LOC100162846	NC_042496.1	938749	-	1.2566e-05	0.0350265	44.5
uncharacterized LOC100569905	NC_042495.1	99019209	-	7.7571e-06	0.027048	44.4992
uncharacterized LOC100575499	NC_042494.1	90215114	-	9.21629e-06	0.0296341	44.4597
uncharacterized LOC100160594	NC_042495.1	11414153	+	7.12029e-08	0.00175273	44.4539
LOC115034471	NC_042496.1	20964080	-	1.29711e-06	0.0104926	44.4309
v-type proton ATPase 116 kDa subunit a isoform 1-like	NC_042494.1	116462801	-	6.38601e-06	0.0240495	44.4305
lysosomal-trafficking regulator-like	NC_042494.1	157983067	-	4.51914e-06	0.0200743	44.4295
oxidoreductase-like	NC_042494.1	140246647	+	1.59987e-10	5.17109e-05	44.4276
vacuolar protein sorting-associated protein 37B-like	NC_042495.1	92682414	-	1.99702e-06	0.0131911	44.4122
corepressor interacting with RBPJ 1-like	NC_042494.1	125879198	+	3.52531e-06	0.0175769	44.4067
uncharacterized LOC100571489	NC_042494.1	99907014	-	1.98998e-06	0.0131911	44.4056
uncharacterized LOC100162241	NC_042495.1	901887	+	9.45249e-08	0.00211389	44.3972
possible pseudogene or miscRNA, No KEGG entry	NC_042493.1	72389934	-	3.59896e-06	0.0178722	44.3721
zinc finger protein 544-like	NC_042495.1	84582962	+	5.35233e-07	0.00637649	44.3439
annexin-B11-like	NC_042495.1	95066822	+	1.8346e-07	0.00320593	44.3439
possible pseudogene or miscRNA, No KEGG entry	NC_042494.1	101180878	+	2.75554e-06	0.0156682	44.3355
Williams-Beuren syndrome chromosomal region 14 protein homolog	NC_042496.1	9752625	+	1.03269e-05	0.0315853	44.3324
PAB-dependent poly(A)-specific ribonuclease subunit 3-like	NC_042494.1	85615431	+	5.55087e-06	0.0224692	44.3275
LOC103309377	NC_042494.1	127903354	+	1.00562e-06	0.00908493	44.3246
axin-related protein-like	NC_042494.1	50612844	-	7.28753e-06	0.02604	44.3144
# caspase-1 & uncharacterized LOC115034022	NC_042495.1	97586292	-	6.04521e-07	0.00682415	44.3137
UPF0378 protein KIAA0100-like	NC_042496.1	34921485	-	2.27082e-06	0.0141288	44.3089
probable complex I intermediate-associated protein 30, mitochondrial-like	NC_042493.1	77044993	+	4.99557e-07	0.00609919	44.3033
inositol 1,4,5-trisphosphate receptor-like	NC_042493.1	15358250	-	7.26748e-08	0.00178306	44.3008
ATP-dependent zinc metalloprotease YME1 homolog	NC_042493.1	31750278	+	2.76114e-06	0.0156682	44.2768
transmembrane protein 192-like	NC_042493.1	68094440	-	2.06495e-05	0.0449777	44.2756
serine/threonine-protein kinase PAK 7-like	NC_042494.1	69910164	-	9.87436e-07	0.00904042	44.2727
probable G-protein coupled receptor 125-like	NC_042494.1	1259919	+	4.6891e-06	0.0203853	44.2529
N/A	NC_042493.1	115553004	-	1.61952e-05	0.0396268	44.25
striatin-3-like	NC_042494.1	43070202	+	2.82126e-06	0.0157694	44.2428
N/A	NC_042493.1	76683076	+	2.90687e-06	0.0160254	44.2402
uncharacterized LOC100163657	NC_042495.1	52049882	-	1.81854e-07	0.00318847	44.2389
fatty acid desaturase-like	NC_042495.1	110737591	+	2.56162e-06	0.0150693	44.232
protein VAC14 homolog	NC_042494.1	120298813	+	4.94594e-13	1.1374e-06	44.2308
ATP-binding cassette sub-family G member 8-like	NC_042494.1	85494205	-	2.79028e-06	0.0157192	44.2154
possible pseudogene or miscRNA, No KEGG entry	NC_042493.1	29824265	-	8.68724e-07	0.00845388	44.1924
uncharacterized LOC100164664	NC_042496.1	33986400	+	2.55255e-06	0.0150493	44.1901
ubiquitin carboxyl-terminal hydrolase 5-like	NC_042494.1	148116793	+	2.29741e-06	0.0142274	44.186
AP-1 complex subunit sigma-2-like	NC_042495.1	1520534	-	4.24142e-06	0.0194395	44.1648
low-density lipoprotein receptor-related protein 1-like	NC_042494.1	3293374	-	1.95429e-05	0.0437334	44.1622
motile sperm domain-containing protein 2-like	NC_042494.1	105109577	+	1.4817e-06	0.0113213	44.1602
LOC100165052	NC_042495.1	1039498	+	2.20375e-06	0.0139073	44.1558
uncharacterized LOC100569986	NC_042495.1	2935262	+	3.36542e-06	0.0172385	44.1527
dedicator of cytokinesis protein 7-like	NC_042493.1	79754271	+	3.5615e-08	0.00121451	44.1404
homeodomain-interacting protein kinase 2-like	NC_042494.1	94838875	-	3.30288e-07	0.00466656	44.1288
P protein-like	NC_042495.1	3929866	+	7.10609e-06	0.0257065	44.0909
uncharacterized LOC100165111	NC_042493.1	82639954	+	2.2486e-06	0.014059	44.0893
tyrosine-protein phosphatase 10D-like	NC_042493.1	80348366	+	5.27131e-07	0.00631894	44.083
putative glycerophosphocholine phosphodiesterase GPCPD1-like	NC_042493.1	10019800	-	1.7983e-06	0.0125645	44.0823
uncharacterized LOC100165612	NC_042493.1	80455152	-	7.72856e-06	0.0269865	44.0385
uncharacterized LOC100166091	NC_042493.1	31320011	+	1.30085e-05	0.0354361	44.0385
platelet glycoprotein V-like	NC_042494.1	54631957	-	1.94764e-05	0.0436634	44.0376
N/A	NC_042494.1	94855393	-	2.43476e-05	0.0485157	44.0223
uncharacterized LOC100161874	NC_042493.1	34631973	-	1.12003e-08	0.000604515	44
uncharacterized LOC100575738	NC_042494.1	29691178	-	7.58878e-06	0.0266486	44
FERM domain-containing protein 3-like	NC_042495.1	60482133	-	2.1741e-05	0.0460464	44
uncharacterized LOC100160898	NC_042494.1	101554442	-	5.71561e-06	0.0228195	43.9935
N/A	NC_042493.1	85156862	+	1.73772e-05	0.0411228	43.9776
UHRF1-binding protein 1-like	NC_042496.1	36705832	-	1.40945e-06	0.011123	43.9672
peroxisomal membrane protein PEX14-like	NC_042494.1	115373825	-	2.2508e-05	0.0468636	43.9412
2-oxoglutarate dehydrogenase, mitochondrial-like	NC_042494.1	160858858	-	1.93503e-06	0.0129829	43.9394
possible pseudogene or miscRNA, No KEGG entry	NC_042494.1	22939793	+	5.21948e-06	0.0217478	43.9359
ribonucleoside-diphosphate reductase subunit M2-like	NC_042493.1	42610234	+	1.57103e-05	0.0390084	43.9286
dynein heavy chain, cytoplasmic-like	NC_042494.1	19329175	-	1.94217e-05	0.0436122	43.9276
PAB-dependent poly(A)-specific ribonuclease subunit 2-like	NC_042494.1	112756898	+	7.5157e-09	0.000477537	43.9024
N/A	NC_042495.1	102054670	-	2.2963e-05	0.0472892	43.9024
N/A	NC_042496.1	27604866	-	4.7272e-07	0.00587661	43.8958
down syndrome cell adhesion molecule	NC_042496.1	28264771	+	4.26496e-06	0.019504	43.8882
N/A	NW_021770000.1	7552	-	1.92856e-07	0.0032883	43.871
ring canal kelch homolog	NC_042494.1	113463097	+	2.40932e-06	0.0145635	43.8378
N/A	NC_042496.1	37341799	-	7.26596e-07	0.00767262	43.8206
ATP-binding cassette sub-family G member 4-like	NC_042494.1	138019417	-	8.61896e-08	0.00198986	43.8149
methyltransferase-like protein 14 homolog	NC_042496.1	40553610	+	1.95893e-05	0.0438108	43.8064
cyclin-A2-like	NC_042494.1	132041582	+	2.49277e-05	0.0489371	43.7888
DNA replication licensing factor MCM3-like	NC_042495.1	108411766	+	3.05233e-07	0.00440932	43.7847
protein RFT1 homolog	NC_042494.1	55937152	+	7.00829e-07	0.0075507	43.7747
N/A	NC_042496.1	41964232	+	5.99363e-06	0.0233037	43.7681
LOC115034191	NC_042495.1	32810538	-	2.77106e-06	0.0157013	43.7607
N/A	NC_042496.1	16234351	+	3.63411e-06	0.017944	43.7371
serpin B4-like	NC_042495.1	95340310	+	2.89531e-06	0.0160028	43.7292
cytoplasmic protein NCK1-like	NC_042493.1	69882211	-	3.9839e-07	0.00525113	43.7005
jmjC domain-containing histone demethylation protein 1-like	NC_042496.1	39456425	+	4.64558e-06	0.0203333	43.6869
USP6 N-terminal-like protein-like	NC_042494.1	124440224	-	9.90507e-07	0.00904042	43.6851
uncharacterized LOC100164676	NC_042493.1	16052876	-	8.03227e-06	0.0274538	43.6735
uncharacterized LOC100169495	NC_042495.1	22364764	-	4.66238e-06	0.0203454	43.6677
WD repeat and FYVE domain-containing protein 3-like	NC_042494.1	133723887	-	1.40008e-05	0.0368956	43.6601
histone acetyltransferase KAT2A-like	NC_042494.1	94937438	-	1.28229e-05	0.0351884	43.659
# collagen type IV alpha-3-binding protein & uncharacterized LOC103309697	NC_042494.1	120717718	-	9.07433e-06	0.0293171	43.6538
N/A	NC_042493.1	99185796	+	7.70717e-07	0.00787238	43.6458
uncharacterized LOC100160811	NC_042494.1	152708361	-	8.42059e-06	0.0282431	43.6364
uncharacterized protein KIAA1310 homolog	NC_042494.1	12032148	+	1.13302e-06	0.00967033	43.617
N/A	NC_042493.1	82048477	+	4.57251e-06	0.0201614	43.6111
transmembrane protein 93-like	NC_042494.1	90951461	+	2.25625e-06	0.0140831	43.5977
LOC107884661	NC_042496.1	2336257	-	3.89837e-06	0.0185179	43.5969
RB1-inducible coiled-coil protein 1-like	NC_042493.1	81965220	+	7.61993e-06	0.0267075	43.5918
uncharacterized LOC100574987	NC_042494.1	65259942	-	5.56198e-07	0.00648086	43.5917
N/A	NC_042493.1	122209332	-	1.77511e-06	0.0124783	43.5912
possible pseudogene or miscRNA, No KEGG entry	NC_042493.1	11692853	-	1.83785e-06	0.0127331	43.5897
ribosome biogenesis protein BRX1 homolog	NC_042495.1	88237530	-	1.85021e-08	0.000795795	43.5897
serine/threonine-protein kinase Genghis Khan-like	NC_042493.1	21315927	-	1.02583e-06	0.00921001	43.5777
ATP-binding cassette sub-family G member 8-like	NC_042494.1	85494200	-	1.54387e-06	0.0114657	43.5683
N/A	NC_042493.1	58453727	+	1.55112e-05	0.0387674	43.5673
N/A	NC_042496.1	15888798	-	1.14572e-05	0.0331284	43.5556
LOC100166219	NC_042495.1	38567810	-	6.18315e-08	0.00159931	43.5484
N/A	NC_042496.1	2337514	-	1.49384e-05	0.0379488	43.5452
N/A	NC_042494.1	80359754	-	1.74379e-07	0.00313883	43.5399
zinc finger protein 271-like	NC_042494.1	125050278	+	1.98171e-05	0.0441345	43.5343
lipopolysaccharide-induced tumor necrosis factor-alpha factor homolog	NC_042495.1	81211929	-	7.63419e-07	0.00784962	43.5294
N/A	NC_042496.1	37343658	-	5.6029e-07	0.00651832	43.5294
N/A	NC_042494.1	153053803	+	3.81381e-06	0.0183034	43.521
N/A	NC_042496.1	42286086	+	7.79358e-06	0.0270934	43.5185
furin-like protease 1, isoform 1-CRR-like	NC_042495.1	114899369	-	2.60904e-06	0.0152721	43.5173
transcription elongation factor SPT5-like	NC_042494.1	58688052	-	4.62419e-07	0.00578726	43.5072
WD repeat domain phosphoinositide-interacting protein 2-like	NC_042494.1	147776500	+	2.19101e-05	0.0461822	43.5054
LOC115034191	NC_042495.1	32811241	-	5.56352e-06	0.02247	43.4948
eIF2B-alpha protein-like	NC_042494.1	121488785	-	1.19452e-06	0.00998881	43.4874
N/A	NC_042495.1	96405580	-	1.12967e-05	0.0329516	43.4858
metal transporter CNNM2-like	NC_042493.1	91399419	-	7.95597e-06	0.027327	43.4848
LOC100168088	NC_042495.1	97135031	+	2.22602e-05	0.0466281	43.4783
N/A	NC_042495.1	102020390	+	1.10565e-07	0.00236871	43.4783
LOC107884547	NC_042495.1	102067627	-	2.04244e-05	0.0447762	43.4783
serine/threonine-protein kinase Nek8-like	NC_042495.1	1173525	-	3.82447e-07	0.00510434	43.4626
uncharacterized LOC100160898	NC_042494.1	101560510	+	1.69012e-05	0.0404344	43.4566
structural maintenance of chromosomes protein 3-like	NC_042495.1	79872477	+	2.18846e-06	0.0138598	43.4343
possible pseudogene or miscRNA, No KEGG entry	NC_042493.1	11669133	-	6.94549e-06	0.0253724	43.4295
UPF0485 protein C1orf144 homolog	NC_042494.1	106470088	+	2.18403e-05	0.0461122	43.4174
N/A	NC_042493.1	11466254	+	2.34269e-05	0.0476937	43.3992
P protein-like	NC_042495.1	3929895	-	1.54216e-07	0.0029246	43.3984
uncharacterized LOC100168934	NC_042494.1	92713573	-	3.61772e-08	0.00122805	43.3962
e3 SUMO-protein ligase PIAS2-like	NC_042493.1	84879065	+	4.92225e-07	0.00604515	43.3941
zinc finger protein 808-like	NC_042495.1	8274030	+	1.05866e-06	0.0093846	43.3921
Mrpl1	NC_042496.1	41789319	+	2.81573e-06	0.0157503	43.3854
ATP-dependent RNA helicase DDX19A-like	NC_042494.1	61595427	-	2.2715e-05	0.0470372	43.357
# legumain & putative uncharacterized protein DDB_G0282499	NC_042493.1	4000727	+	2.23966e-06	0.0140267	43.3333
dystrophin, isoforms A/C/F/G/H-like	NC_042496.1	8409662	+	3.0157e-06	0.0163283	43.3333
zinc finger protein 41-like	NC_042494.1	74937287	-	1.04242e-05	0.0316848	43.3316
Nip7	NC_042494.1	134715639	-	2.94694e-06	0.0161387	43.3226
P protein-like	NC_042495.1	3929893	-	1.74208e-06	0.012336	43.3091
WD repeat-containing protein 19-like	NC_042496.1	21557679	-	2.02725e-06	0.0132969	43.2967
N/A	NC_042494.1	70536607	+	1.25434e-05	0.0350028	43.2927
WD repeat domain phosphoinositide-interacting protein 4-like	NC_042495.1	4213425	+	7.05279e-06	0.0255702	43.2692
NAD kinase-like	NC_042495.1	12157888	+	3.86693e-08	0.00127462	43.2497
myotubularin-related protein 10-B-like	NC_042494.1	85773602	-	5.97936e-06	0.0233001	43.2453
f-box/LRR-repeat protein 6-like	NC_042494.1	90360073	+	1.78125e-06	0.0124998	43.2292
ATP-binding cassette sub-family G member 8-like	NC_042494.1	85494141	-	5.73896e-07	0.00660881	43.2217
uncharacterized LOC100162880	NC_042496.1	41900453	-	8.9863e-06	0.029166	43.2079
uncharacterized LOC100166610	NC_042495.1	112173068	+	2.1286e-07	0.00350867	43.2027
LOC100163013	NC_042494.1	165405915	-	6.20257e-06	0.0237764	43.1836
leucine-rich repeats and immunoglobulin-like domains protein 1-like	NC_042493.1	25473551	+	5.12111e-06	0.021436	43.1818
cleavage and polyadenylation specificity factor subunit 5-like	NC_042494.1	124492464	+	8.78131e-06	0.0288341	43.1746
N/A	NC_042494.1	153057563	-	1.86323e-05	0.0425687	43.1739
eukaryotic translation initiation factor 5-like	NC_042496.1	37628030	-	3.53696e-07	0.0048617	43.1669
probable ATP-dependent RNA helicase DDX31-like	NC_042495.1	38011	-	1.48514e-06	0.0113213	43.1591
t-complex protein 1 subunit gamma-like	NC_042493.1	76524203	-	3.60566e-06	0.0178816	43.1395
coronin-2B-like	NC_042494.1	121040513	-	7.47023e-06	0.0263944	43.1373
casein kinase I isoform alpha-like	NC_042495.1	108282252	-	5.74436e-06	0.0228979	43.133
N/A	NC_042495.1	87915114	+	1.04342e-06	0.00928963	43.1159
N/A	NC_042496.1	37576326	+	9.87274e-07	0.00904042	43.1119
protein scribble homolog	NC_042495.1	103854295	+	3.07935e-06	0.0164809	43.1059
LOC100164947	NC_042493.1	42396821	+	3.80421e-06	0.0182928	43.0867
nuclear transport factor 2-like	NC_042495.1	76893789	-	1.20048e-08	0.00062527	43.0798
uncharacterized LOC100572761	NC_042493.1	16646211	-	5.58941e-08	0.00154468	43.0628
uncharacterized LOC100575022	NC_042493.1	21487745	-	2.0723e-05	0.0450716	43.0556
LETM1 and EF-hand domain-containing protein anon-60Da, mitochondrial-like	NC_042495.1	25916483	+	3.37354e-06	0.0172385	43.0345
uncharacterized LOC100169531	NC_042495.1	96284451	-	1.30863e-06	0.0105592	43.0321
FYVE, RhoGEF and PH domain-containing protein 6-like	NC_042493.1	1957513	+	3.77359e-06	0.0182459	43.0159
cyclic AMP-dependent transcription factor ATF-4-like	NC_042494.1	106610135	+	4.429e-06	0.0198584	43.0048
DNA topoisomerase 2-binding protein 1-B-like	NC_042494.1	127847407	+	1.46861e-05	0.0376213	42.9825
uncharacterized LOC100160811	NC_042494.1	152707631	+	2.54804e-05	0.0495048	42.9787
polypeptide N-acetylgalactosaminyltransferase 5-like	NC_042495.1	39930190	-	1.55755e-06	0.0115297	42.9772
uncharacterized LOC100569295	NC_042493.1	1521120	+	1.89755e-05	0.0430598	42.9744
N/A	NC_042493.1	66318367	-	5.56638e-06	0.02247	42.9535
microtubule-actin cross-linking factor 1, isoforms 1/2/3/5-like	NC_042495.1	45125635	-	7.06668e-07	0.00758948	42.9511
inositol-3-phosphate synthase 1-like	NC_042495.1	109300927	+	1.7849e-05	0.0416217	42.9429
LOC103308569	NC_042495.1	64163719	+	1.09518e-05	0.0324739	42.9293
LOC100165052	NC_042495.1	1034051	+	6.75698e-08	0.00168228	42.9187
chromodomain-helicase-DNA-binding protein Mi-2 homolog	NC_042494.1	55972498	-	2.19477e-07	0.00357024	42.8922
N/A	NC_042493.1	1549342	-	2.40829e-06	0.0145635	42.8571
plastin-3-like	NC_042493.1	48064912	-	2.48934e-05	0.0489369	42.8571
probable ubiquitin carboxyl-terminal hydrolase FAF-X-like	NC_042494.1	11328317	+	9.6243e-08	0.00212938	42.8571
probable Ras GTPase-activating protein-like	NC_042495.1	62068924	+	1.5618e-06	0.0115297	42.8571
LOC100167963	NC_042495.1	62393378	-	4.73767e-08	0.00141446	42.8571
alpha-taxilin-like	NC_042495.1	90569180	+	1.58468e-05	0.0392101	42.8571
zinc finger protein 429-like	NC_042495.1	58133909	+	1.02462e-05	0.0314755	42.8451
LOC100165622	NC_042494.1	103428364	-	8.34892e-06	0.0281224	42.8342
possible pseudogene or miscRNA, No KEGG entry	NC_042495.1	13998058	+	1.06527e-06	0.00940529	42.8241
dehydrodolichyl diphosphate synthase-like	NC_042496.1	24312567	+	1.00024e-06	0.00906807	42.8191
protein bicaudal C homolog 1-like	NC_042494.1	78292151	+	3.26647e-06	0.016993	42.8125
LOC100160294	NC_042494.1	161318127	+	1.60479e-06	0.0117178	42.8075
LOC107883287	NC_042493.1	41888910	+	1.82793e-05	0.0420959	42.807
possible pseudogene or miscRNA, No KEGG entry	NC_042495.1	67606514	+	3.52246e-06	0.0175745	42.803
casein kinase I isoform gamma-3-like	NC_042495.1	112150409	+	2.44027e-06	0.014677	42.7955
N/A	NC_042495.1	102792279	+	5.78078e-06	0.0229319	42.7907
probable cleavage and polyadenylation specificity factor subunit 2-like	NC_042493.1	82064669	-	7.28561e-06	0.02604	42.7778
serine/threonine-protein kinase TAO1-like	NC_042494.1	13764151	+	6.75249e-07	0.00736043	42.7778
protein suppressor of forked-like	NC_042496.1	5415535	-	5.53338e-07	0.00646781	42.7717
N/A	NC_042496.1	41967117	+	7.12352e-07	0.00758948	42.7586
N/A	NC_042494.1	56699172	+	7.17304e-07	0.00758948	42.7518
pre-mRNA-processing factor 6-like	NC_042494.1	142391934	-	2.86563e-08	0.00104477	42.7443
LOC103308416	NC_042493.1	125901104	+	6.7355e-06	0.0248392	42.7373
serine/threonine-protein kinase PAK 7-like	NC_042494.1	69909887	+	1.9247e-07	0.0032883	42.7368
uncharacterized LOC100570440	NC_042493.1	72467163	-	4.45095e-06	0.0198969	42.7239
spectrin beta chain-like	NC_042494.1	111659182	+	2.96946e-06	0.0161706	42.711
N/A	NC_042495.1	29873616	-	8.16745e-06	0.0277627	42.6974
# lysine-specific demethylase 3A & uncharacterized LOC100575399	NC_042493.1	71714453	+	6.0119e-06	0.0233626	42.6923
serine/threonine-protein kinase D1-like	NC_042493.1	85091915	-	1.74236e-06	0.012336	42.6716
# zinc finger protein 271-like & zinc finger BED domain-containing protein 5-like	NC_042494.1	125052683	+	2.59526e-05	0.0497304	42.6712
afadin-like	NC_042494.1	89390062	+	2.32889e-05	0.0476093	42.6705
activin receptor type-2B-like	NC_042494.1	58055488	+	8.46283e-06	0.0283264	42.6692
poly [ADP-ribose] polymerase 12-like	NC_042495.1	94188539	-	7.17426e-07	0.00758948	42.6676
intraflagellar transport protein 140 homolog	NC_042496.1	40770923	+	2.16282e-05	0.0459106	42.6599
uncharacterized LOC100166300	NC_042494.1	45452553	+	9.91778e-06	0.0308877	42.6557
LOC115034022	NC_042495.1	97647781	-	1.0491e-05	0.0317692	42.6471
n-terminal kinase-like protein-like	NC_042493.1	69248379	+	4.75889e-06	0.0205445	42.632
N/A	NC_042494.1	44097776	-	3.77619e-06	0.0182459	42.622
LOC103308877	NC_042493.1	41975021	+	1.57126e-09	0.000204926	42.6219
uncharacterized LOC100569986	NC_042495.1	2935182	+	1.20642e-05	0.0342329	42.619
N/A	NC_042495.1	102307406	+	4.43463e-06	0.0198717	42.6032
serine/threonine-protein kinase Genghis Khan-like	NC_042493.1	21313593	+	2.25665e-05	0.0469048	42.5926
lon protease homolog, mitochondrial-like	NC_042496.1	9157336	+	1.42104e-05	0.0371188	42.5926
structural maintenance of chromosomes protein 2-like	NC_042495.1	76100652	+	1.35188e-06	0.010818	42.5776
uncharacterized LOC100168597	NC_042493.1	9756115	-	6.14334e-06	0.0236508	42.5698
peroxisomal targeting signal 1 receptor-like	NC_042495.1	51047031	+	7.45697e-06	0.0263726	42.5581
DNA-dependent protein kinase catalytic subunit-like	NC_042494.1	73762142	-	8.33326e-07	0.00824955	42.5568
# legumain & uncharacterized LOC100570989	NC_042493.1	4067053	+	1.01742e-05	0.0313708	42.5356
short-chain specific acyl-CoA dehydrogenase, mitochondrial-like	NC_042496.1	36918470	-	5.6778e-07	0.006577	42.5239
transcription factor E2F2-like	NC_042494.1	142176061	+	5.31112e-08	0.00151276	42.522
splicing factor 3B subunit 3-like	NC_042494.1	45205463	+	2.03407e-06	0.0133228	42.5192
hemicentin-2-like	NC_042494.1	48052059	+	2.22299e-06	0.0139812	42.5062
LOC100168800	NC_042496.1	4452223	-	8.60502e-06	0.0286219	42.5041
uncharacterized LOC100164360	NC_042496.1	3052239	-	9.95442e-07	0.00904662	42.5
N/A	NC_042495.1	68756413	-	2.18005e-05	0.0460585	42.4908
LOC115033030	NC_042493.1	62595123	-	5.16813e-06	0.02156	42.4883
tetratricopeptide repeat protein 28-like	NC_042496.1	30291360	+	3.45758e-06	0.0174146	42.4837
N/A	NC_042495.1	115267646	-	9.33284e-08	0.00210883	42.4812
uncharacterized LOC100164863	NC_042494.1	55032398	+	4.35898e-07	0.00557105	42.481
transformation/transcription domain-associated protein-like	NC_042493.1	8183669	+	1.33528e-05	0.0359022	42.4745
uncharacterized LOC100161169	NC_042496.1	36995962	+	2.37122e-05	0.0478763	42.4682
sodium/potassium-transporting ATPase subunit alpha-like	NC_042495.1	74110808	-	2.84845e-07	0.00423509	42.4641
guanine nucleotide-binding protein G(I)/G(S)/G(T) subunit beta-1-like	NC_042495.1	11239897	+	2.52683e-06	0.0150396	42.4569
N/A	NC_042495.1	74922719	+	2.37008e-07	0.00376479	42.4444
DNA repair protein RAD51 homolog 1-like	NC_042493.1	89156063	+	1.41455e-05	0.0370406	42.4419
eukaryotic translation initiation factor 5-like	NC_042496.1	37629776	-	2.43055e-09	0.000258125	42.4413
LOC115033412	NC_042493.1	3248089	-	1.68873e-05	0.0404344	42.4316
transmembrane protein 165-like	NC_042494.1	64583163	-	5.76324e-06	0.0228979	42.4242
N/A	NC_042496.1	22984423	-	2.454e-05	0.0486224	42.4166
u4/U6 small nuclear ribonucleoprotein Prp31-like	NC_042494.1	108763829	-	1.31018e-08	0.000649739	42.3929
serine/threonine-protein phosphatase 4 regulatory subunit 3-like	NC_042495.1	38326070	-	1.50429e-08	0.000707778	42.3789
uncharacterized LOC100160178	NC_042493.1	57942112	+	8.79071e-06	0.0288395	42.3503
N/A	NC_042495.1	78108936	+	2.12909e-05	0.0456393	42.3503
TNF receptor-associated factor 6-like	NC_042496.1	41178610	+	6.12984e-06	0.023628	42.3378
e3 ubiquitin-protein ligase Bre1-like	NC_042495.1	65545212	+	5.16501e-06	0.0215591	42.3333
uncharacterized LOC100167828	NC_042496.1	4742984	+	3.37809e-08	0.001179	42.3188
ring canal kelch homolog	NC_042495.1	25649848	-	2.18145e-06	0.0138598	42.3101
DNA repair protein RAD51 homolog 1-like	NC_042493.1	89151870	+	3.25653e-09	0.000301589	42.3077
putative methyltransferase METT10D-like	NC_042495.1	24981073	-	6.36442e-06	0.0240169	42.3037
peroxisomal N(1)-acetyl-spermine/spermidine oxidase-like	NC_042495.1	25928343	-	1.49917e-05	0.0380112	42.2989
tRNA pseudouridine synthase-like 1-like	NC_042494.1	101013285	-	1.94563e-07	0.00329472	42.2964
uncharacterized LOC100163401	NC_042494.1	116493500	-	1.92829e-05	0.0434129	42.2922
N/A	NC_042495.1	88235345	+	7.48116e-10	0.000133356	42.2896
myelin expression factor 2-like	NC_042494.1	133663565	+	1.01993e-05	0.0313961	42.2824
uncharacterized LOC100164208	NC_042494.1	145648910	-	1.04369e-05	0.0316848	42.2727
N/A	NC_042493.1	16114511	-	2.35201e-05	0.0477468	42.2619
ACYPI35400	NC_042494.1	38216747	+	2.65743e-06	0.015446	42.2619
H(+)/Cl(-) exchange transporter 7-like	NC_042494.1	141222727	-	1.88117e-06	0.0128772	42.2602
xenotropic and polytropic retrovirus receptor 1-like	NC_042494.1	165040054	-	1.75256e-05	0.0412819	42.2601
DNA repair protein XRCC1-like	NC_042494.1	161353244	+	2.51962e-07	0.00392681	42.2504
ATP-binding cassette sub-family G member 1-like	NC_042494.1	87385496	-	2.05933e-05	0.0449548	42.2492
uncharacterized LOC100166975	NC_042493.1	64756601	-	2.72874e-07	0.00412307	42.247
uncharacterized LOC100571935	NC_042494.1	87312280	+	1.08788e-06	0.00951447	42.2464
lon protease homolog, mitochondrial-like	NC_042496.1	9156934	-	2.10752e-07	0.00348939	42.2268
longitudinals lacking protein, isoforms A/B/D/L-like	NC_042495.1	101947539	-	6.97223e-06	0.0254201	42.2255
CDP-diacylglycerol--glycerol-3-phosphate 3-phosphatidyltransferase, mitochondrial-like	NC_042494.1	83244365	+	3.36163e-06	0.0172385	42.2222
UDP-glucuronosyltransferase 2B17-like	NC_042494.1	101586463	-	6.32098e-07	0.0069926	42.2076
microtubule-actin cross-linking factor 1, isoforms 1/2/3/5-like	NC_042495.1	45119819	+	1.39168e-07	0.00276625	42.2009
# voltage-dependent T-type calcium channel subunit alpha-1H & uncharacterized LOC100568729	NC_042494.1	127011739	-	4.90148e-08	0.0014517	42.1983
protein SERAC1-like	NC_042494.1	56053706	+	8.59857e-06	0.0286145	42.1946
uncharacterized LOC100571463	NC_042493.1	15916484	+	7.82501e-08	0.00185259	42.1918
N/A	NC_042495.1	37036727	+	1.74655e-06	0.0123538	42.1875
uncharacterized LOC100572761	NC_042493.1	16644413	-	2.91658e-06	0.0160369	42.1769
uncharacterized LOC100162005	NC_042493.1	60322541	-	3.60529e-09	0.000322913	42.1759
N/A	NC_042495.1	48260362	+	1.56619e-06	0.0115507	42.1735
Samdc	NC_042495.1	12623538	+	8.53046e-09	0.000532905	42.158
possible pseudogene or miscRNA, No KEGG entry	NC_042494.1	9407167	+	1.14079e-05	0.0330662	42.1569
# legumain & uncharacterized LOC100570989	NC_042493.1	4065774	+	1.20278e-05	0.0341703	42.1296
sortilin-related receptor-like	NC_042495.1	36226345	-	1.81202e-05	0.0418993	42.1154
mitogen-activated protein kinase kinase kinase 15-like	NC_042494.1	129458900	-	1.6783e-05	0.0403625	42.1053
cirhin-like	NC_042494.1	167363219	+	1.18657e-05	0.0339755	42.1053
centromere/kinetochore protein zw10 homolog	NC_042495.1	52061323	-	1.58116e-05	0.0391753	42.1053
transcription factor 25-like	NC_042496.1	17909441	-	6.54374e-06	0.0244367	42.1053
N/A	NC_042494.1	85691892	-	1.56646e-07	0.00295562	42.0833
CCAAT/enhancer-binding protein gamma-like	NC_042495.1	86125397	+	4.59745e-06	0.0202474	42.0779
N/A	NC_042496.1	41988900	-	5.33088e-06	0.0219678	42.0737
putative oxidoreductase GLYR1 homolog	NC_042494.1	153600125	-	2.56657e-06	0.0150829	42.0722
uncharacterized LOC100166300	NC_042494.1	45451943	+	1.24332e-07	0.00257462	42.0635
ATP-binding cassette sub-family F member 1-like	NC_042494.1	96663985	-	1.23518e-05	0.0347422	42.054
ancient ubiquitous protein 1-like	NC_042495.1	95816104	-	2.91571e-07	0.00429217	42.0513
zinc finger protein ubi-d4-like	NC_042493.1	67207130	-	4.07486e-06	0.0189664	42.0479
exosome complex exonuclease RRP44-like	NC_042494.1	80859433	-	1.07694e-05	0.0322033	42.0455
# proton-coupled amino acid transporter 4-like & myotubularin-related protein 4	NC_042496.1	6163868	+	2.79612e-06	0.015728	42.0343
# zinc finger protein on ecdysone puffs & uncharacterized LOC103309117	NC_042493.1	80431738	-	2.25176e-05	0.0468636	42.0306
N/A	NC_042496.1	37127553	-	2.25176e-05	0.0468636	42.0306
N/A	NC_042496.1	33531510	+	1.07891e-05	0.0322242	42.029
intraflagellar transport protein 140 homolog	NC_042496.1	40775026	-	5.60243e-06	0.0225502	42.029
pyridoxal kinase-like	NC_042494.1	122940455	-	5.73526e-06	0.0228857	42.0209
cytoskeleton-associated protein 5-like	NC_042495.1	116114346	-	1.03556e-05	0.031597	42.0177
uncharacterized LOC100573032	NC_042493.1	36948646	+	5.10353e-07	0.00618919	42.0139
uncharacterized LOC100164208	NC_042494.1	145647687	-	1.54149e-05	0.0386101	42.0076
N/A	NC_042495.1	33652364	+	6.97124e-06	0.0254201	42.0027
probable kinetochore protein NUF2-like	NC_042495.1	76396384	+	1.50147e-06	0.0113242	41.9935
protein dopey-1 homolog	NC_042494.1	53553369	-	3.15148e-06	0.0166619	41.993
uncharacterized LOC100166888	NC_042495.1	50876148	+	1.50477e-05	0.0380919	41.9879
acetyl-CoA carboxylase-like	NC_042493.1	29596292	-	2.10716e-06	0.013586	41.9794
golgi-specific brefeldin A-resistance guanine nucleotide exchange factor 1-like	NC_042495.1	25549940	-	2.32479e-06	0.0143452	41.9753
LOC100168800	NC_042496.1	4451548	-	1.35911e-08	0.000660367	41.9753
uncharacterized LOC100572939	NC_042494.1	36022336	+	6.29787e-06	0.0239548	41.9729
possible pseudogene or miscRNA, No KEGG entry	NC_042493.1	122004317	+	6.17368e-06	0.0236963	41.9686
probable ATP-dependent RNA helicase DDX5-like	NC_042495.1	81473727	+	3.84285e-06	0.0183362	41.9672
uncharacterized LOC100164242	NC_042494.1	129470536	-	4.29369e-06	0.0195345	41.9643
dedicator of cytokinesis protein 7-like	NC_042493.1	79761825	-	9.7448e-07	0.00900481	41.9587
integrator complex subunit 2-like	NC_042496.1	36678285	+	1.04689e-07	0.00227561	41.9587
histone acetyltransferase type B catalytic subunit-like	NC_042493.1	71522250	-	1.92039e-06	0.0129632	41.9577
N/A	NC_042495.1	68755067	+	3.69667e-08	0.00124349	41.9433
filamin-C-like	NC_042494.1	12467043	+	1.51728e-06	0.011359	41.9375
uncharacterized LOC100169179	NC_042494.1	76784447	+	9.91087e-07	0.00904042	41.9355
uncharacterized LOC100569905	NC_042495.1	99013213	-	2.63641e-06	0.015384	41.9319
putative alpha-1,2-glucosyltransferase ALG10-B-like	NC_042493.1	36703088	+	1.33109e-05	0.035887	41.9274
uncharacterized LOC100166017	NC_042495.1	61397844	-	5.97531e-06	0.0233001	41.9231
protein peanut-like	NC_042494.1	66530181	+	2.13408e-05	0.045653	41.9109
transcriptional repressor CTCFL-like	NC_042494.1	105096479	-	1.00162e-05	0.0310253	41.8981
signal transducing adapter molecule 1-like	NC_042494.1	56447464	-	4.45503e-06	0.0199031	41.8945
tetratricopeptide repeat protein 28-like	NC_042496.1	30293292	+	4.57759e-07	0.00575433	41.8831
fatty acid synthase-like	NC_042494.1	66985646	+	1.24333e-05	0.0348134	41.8794
N/A	NC_042496.1	41964276	+	3.72337e-06	0.0181625	41.8744
phosphorylated CTD-interacting factor 1-like	NC_042493.1	93096711	-	3.6891e-06	0.0180972	41.8707
LOC115034376	NC_042493.1	89069348	-	2.77671e-06	0.0157035	41.847
LOC100163414	NC_042494.1	75888120	+	5.00948e-06	0.0211788	41.8389
# mitogen-activated protein kinase kinase kinase 7 & protein phosphatase 2 catalytic subunit alpha isoform	NC_042496.1	13811347	-	4.43862e-06	0.0198776	41.8367
cyclin-dependent kinase 10-like	NC_042494.1	66556133	-	7.98171e-06	0.027349	41.8354
mitochondrial ribosomal protein L27	NC_042495.1	100721146	-	2.68198e-06	0.0155159	41.8239
tyrosine-protein phosphatase 10D-like	NC_042493.1	80342077	-	1.26357e-05	0.0351097	41.8182
ring canal kelch homolog	NC_042495.1	25854499	+	8.51089e-06	0.0284476	41.8182
uncharacterized LOC100158844	NC_042495.1	102729336	+	8.10102e-08	0.0018888	41.804
RRP12-like protein-like	NC_042495.1	85720959	-	2.57202e-07	0.00398343	41.8033
vesicle transport protein GOT1B-like	NC_042495.1	76391139	+	8.52459e-07	0.00836042	41.8001
adenylosuccinate synthetase-like	NC_042493.1	51272733	+	1.30786e-05	0.035562	41.7925
diuretic hormone class 2-like	NC_042495.1	48243501	-	1.69593e-05	0.0405194	41.7832
signal transducer and activator of transcription 5B-like	NC_042494.1	106124145	+	1.99723e-05	0.0443855	41.7636
LOC103309160	NC_042494.1	61651042	-	2.53987e-06	0.0150493	41.7582
serine/threonine-protein kinase PINK1, mitochondrial-like	NC_042496.1	36763860	+	8.66416e-06	0.0286704	41.7582
zinc finger protein 234-like	NC_042495.1	107703573	+	1.14485e-05	0.0331162	41.7427
condensin-2 complex subunit D3-like	NC_042495.1	75158238	-	1.92634e-05	0.0433952	41.733
rapamycin-insensitive companion of mTOR-like	NC_042494.1	85532579	+	2.39935e-05	0.048187	41.7191
uncharacterized LOC100573032	NC_042493.1	36944217	-	4.17902e-08	0.00129445	41.7176
exosome complex exonuclease MTR3-like	NC_042494.1	162177846	-	2.79442e-07	0.00418826	41.7126
possible pseudogene or miscRNA, No KEGG entry	NC_042493.1	11669143	-	2.70868e-06	0.0155409	41.7094
lysosomal thioesterase PPT2 homolog	NC_042493.1	15942126	+	4.33838e-07	0.00556063	41.6667
N/A	NC_042496.1	19888041	+	5.49766e-08	0.00154468	41.6629
# transmembrane 9 superfamily member 2 & uncharacterized LOC107884431	NC_042493.1	87500255	+	5.66574e-06	0.0227181	41.6487
N/A	NC_042495.1	30082950	-	1.31936e-05	0.035744	41.6454
# alpha-ketoglutarate-dependent dioxygenase alkB homolog 4 & DNA helicase MCM8-like	NC_042494.1	108761013	+	9.31252e-06	0.0298146	41.6446
calcium-independent protein kinase C-like	NC_042493.1	57762203	+	9.41077e-07	0.0088336	41.6422
N/A	NC_042496.1	31704342	+	1.54958e-05	0.0387493	41.639
N/A	NC_042494.1	82435402	-	1.87239e-05	0.0426583	41.6354
GPI transamidase component PIG-S-like	NC_042494.1	76452936	-	9.66384e-06	0.0304541	41.6344
calcineurin-binding protein cabin-1-like	NC_042493.1	81880365	-	8.89599e-07	0.00857348	41.6333
trifunctional nucleotide phosphoesterase protein YfkN-like	NC_042496.1	15928304	+	9.25561e-06	0.0297091	41.6325
LOC103309010	NC_042496.1	5438491	+	7.31556e-08	0.00178895	41.6201
tyrosine-protein phosphatase 10D-like	NC_042493.1	80342323	-	8.91558e-06	0.0290696	41.6135
N/A	NC_042493.1	46912902	+	1.72565e-05	0.0409199	41.6081
zinc finger protein 266-like	NC_042493.1	11637951	+	1.18875e-06	0.00998396	41.5942
ATP-binding cassette sub-family B member 6, mitochondrial-like	NC_042494.1	99665751	-	1.09057e-05	0.0324054	41.5873
P protein-like	NC_042495.1	3929882	-	1.99317e-06	0.0131911	41.5675
N/A	NC_042496.1	31468464	-	9.6935e-06	0.0305087	41.5584
CCR4-NOT transcription complex subunit 7-like	NC_042495.1	57650159	+	1.121e-06	0.00962298	41.5534
ruvB-like helicase 1-like	NC_042495.1	112123656	-	2.30147e-06	0.0142339	41.5385
zinc finger protein 91-like	NC_042493.1	29464429	+	3.94674e-07	0.0052114	41.5299
sestrin-3-like	NC_042495.1	34512734	+	7.64514e-07	0.00784969	41.526
uncharacterized LOC100163803	NC_042496.1	37657804	-	4.56274e-06	0.0201422	41.5254
structural maintenance of chromosomes protein 2-like	NC_042495.1	76100645	+	5.12743e-06	0.0214504	41.4669
neuroendocrine protein 7B2-like	NC_042496.1	30992716	-	2.43745e-05	0.0485273	41.4336
N/A	NC_042495.1	14471153	-	1.51789e-05	0.038235	41.4286
eukaryotic translation initiation factor 2-alpha kinase-like	NC_042494.1	105426152	-	1.05679e-05	0.0318969	41.4274
N/A	NC_042495.1	86734679	+	1.96032e-05	0.0438155	41.4223
peptide transporter family 1-like	NC_042495.1	115575279	-	1.78517e-06	0.012508	41.4117
fatty acid synthase-like	NC_042494.1	66981441	+	4.02475e-06	0.018877	41.3984
# ABC transporter F family member 4 & uncharacterized LOC100163338	NC_042495.1	38047440	+	8.41599e-08	0.00195515	41.3948
protogenin B-like	NC_042494.1	161508347	+	1.62207e-05	0.0396271	41.388
N/A	NC_042494.1	56699183	+	3.45578e-08	0.0011949	41.3793
uncharacterized LOC100161429	NC_042494.1	107439840	+	7.89715e-06	0.0272654	41.3778
uncharacterized LOC100573809	NC_042493.1	41731536	+	8.34818e-07	0.00824955	41.3675
uncharacterized LOC100163781	NC_042494.1	89214046	-	4.23241e-06	0.0194359	41.3455
RGM domain family member B-like	NC_042494.1	147848094	+	2.91329e-09	0.000281266	41.3333
Rspry1	NC_042495.1	71909327	-	1.72902e-05	0.0409609	41.3318
cyclin-dependent kinase 8-like	NC_042496.1	31108429	+	1.81472e-05	0.0419115	41.3068
Rpl27	NC_042494.1	87317609	-	2.60822e-06	0.0152721	41.3043
zinc finger protein 596-like	NC_042495.1	51577356	-	1.35112e-08	0.000660367	41.3043
# Polr2h & replication factor C subunit 4	NC_042494.1	154361393	+	1.00424e-05	0.0310545	41.3024
cyclin-dependent kinase 8-like	NC_042496.1	31112271	-	1.45112e-05	0.0374583	41.3004
N/A	NC_042494.1	70275477	+	2.15104e-05	0.0457867	41.2994
N/A	NC_042493.1	82416376	-	6.01986e-06	0.0233813	41.2948
DNA mismatch repair protein Mlh1-like	NC_042495.1	83676580	+	5.0235e-09	0.000390574	41.2946
WD repeat-containing protein 7-like	NC_042493.1	73374092	+	2.06341e-05	0.0449777	41.2867
regulatory-associated protein of mTOR-like	NC_042494.1	10486831	-	2.59764e-06	0.0152439	41.2698
nocturnin-like	NC_042494.1	1706406	+	1.32272e-06	0.0106238	41.2642
N/A	NC_042494.1	78189673	+	1.36669e-05	0.0363641	41.2465
uncharacterized LOC100161662	NC_042495.1	39112700	-	2.01904e-05	0.0445365	41.2454
bumetanide-sensitive sodium-(potassium)-chloride cotransporter-like	NC_042496.1	38161662	-	1.4937e-05	0.0379488	41.2429
BTB/POZ domain-containing adapter for CUL3-mediated RhoA degradation protein 2-like	NC_042495.1	19053956	+	3.31049e-06	0.0170721	41.2333
N/A	NC_042494.1	113912134	-	2.87661e-06	0.0159659	41.2281
phosphatidylinositol-4,5-bisphosphate 3-kinase catalytic subunit delta isoform-like	NC_042494.1	147257099	-	2.6013e-05	0.0497685	41.2191
uncharacterized LOC100575315	NC_042495.1	85539345	+	2.08673e-05	0.045241	41.2179
myotubularin-related protein 10-B-like	NC_042494.1	85778611	+	1.79645e-06	0.0125634	41.2088
uncharacterized LOC100571126	NC_042494.1	98222812	-	5.79063e-06	0.022941	41.2037
prolow-density lipoprotein receptor-related protein 1-like	NC_042494.1	153559575	+	2.83767e-06	0.0158254	41.194
FACT complex subunit Ssrp1-like	NC_042496.1	35028653	+	1.10745e-06	0.00958421	41.1918
N/A	NC_042495.1	102178281	+	3.05468e-06	0.0164198	41.1905
N/A	NC_042494.1	49085511	-	1.70282e-05	0.0406251	41.1874
# uncharacterized LOC100572851 & uncharacterized LOC107884486	NC_042494.1	168191150	-	2.3884e-05	0.04809	41.1765
structural maintenance of chromosomes protein 6-like	NC_042494.1	133740693	-	1.13798e-05	0.0330461	41.1681
uncharacterized LOC100169563	NC_042495.1	116760474	+	5.41676e-06	0.0221864	41.1513
zinc finger protein-like 1-like	NC_042493.1	85300992	+	6.38414e-06	0.0240495	41.1509
abnormal spindle-like microcephaly-associated protein homolog	NC_042494.1	23646692	-	3.9929e-06	0.0187631	41.1497
uncharacterized LOC100158681	NC_042493.1	56397635	+	5.30868e-06	0.0219249	41.1432
uncharacterized LOC100163781	NC_042494.1	89221015	+	1.26478e-05	0.0351097	41.1388
blood vessel epicardial substance-like	NC_042494.1	122285096	+	6.49997e-06	0.0244139	41.1111
inner nuclear membrane protein Man1-like	NC_042496.1	17157877	-	1.88914e-05	0.0429282	41.1111
negative elongation factor B-like	NC_042496.1	25001942	+	1.21627e-05	0.0344506	41.0837
USP6 N-terminal-like protein-like	NC_042494.1	124440203	-	7.74835e-07	0.00789237	41.0831
dual specificity protein phosphatase 7-like	NC_042494.1	85481559	-	5.64599e-07	0.00655819	41.0819
protein FAM116B-like	NC_042493.1	77631562	+	2.03757e-05	0.0447088	41.0795
epidermal growth factor receptor substrate 15-like 1-like	NC_042494.1	49001142	+	8.54254e-06	0.0285131	41.0784
tetratricopeptide repeat protein 28-like	NC_042496.1	30296786	-	1.51999e-05	0.038235	41.0569
uncharacterized LOC100166817	NC_042496.1	34826742	-	7.07068e-06	0.0256158	41.0535
rab GTPase-activating protein 1-like	NC_042495.1	44406078	-	1.38991e-05	0.0367441	41.0412
CCR4-NOT transcription complex subunit 1-like	NC_042494.1	157954964	+	1.21836e-05	0.0344777	41.0287
CG42231-like	NC_042494.1	160562855	+	1.12706e-07	0.00240764	41.0256
CG4239-like	NC_042494.1	45385639	+	2.53573e-05	0.0493862	41.0173
uncharacterized LOC100569295	NC_042493.1	1500669	+	1.2413e-05	0.0347828	41.0154
LOC107883513	NC_042494.1	73785505	-	2.52239e-05	0.0492554	41.0153
ankyrin repeat domain-containing protein 50-like	NC_042493.1	18069468	+	1.06705e-05	0.0320892	41.0101
N/A	NC_042494.1	100392567	-	2.22046e-05	0.0465509	41.0032
ATP-dependent RNA helicase A-like	NC_042495.1	36851008	-	1.18711e-05	0.0339755	41.0019
N/A	NC_042496.1	21582033	+	1.95237e-05	0.0437298	41.0015
protein MCM10 homolog	NC_042495.1	98516008	+	3.0388e-06	0.0163827	40.9809
ankyrin repeat domain-containing protein 27-like	NC_042494.1	142709243	-	2.15127e-05	0.0457867	40.9787
lysine-specific demethylase 8-like	NC_042495.1	8562233	-	3.55233e-07	0.00486337	40.9764
N/A	NC_042493.1	836010	+	1.23848e-05	0.0347663	40.9722
N/A	NC_042493.1	19179328	-	1.63059e-06	0.0118032	40.9615
arf-GAP with coiled-coil, ANK repeat and PH domain-containing protein 3-like	NC_042493.1	89129035	-	1.35428e-05	0.0362181	40.9565
poly [ADP-ribose] polymerase 12-like	NC_042495.1	94189499	-	9.60719e-07	0.00896111	40.9524
transmembrane emp24 domain-containing protein eca-like	NC_042494.1	118107682	+	2.10066e-05	0.0453575	40.9091
uncharacterized LOC100161608	NC_042494.1	167391384	+	1.2931e-05	0.0353288	40.9091
LOC100158840	NC_042496.1	17240241	-	2.4121e-05	0.0483461	40.9091
e3 ubiquitin-protein ligase RFWD3-like	NC_042494.1	87406529	-	1.89195e-06	0.0128898	40.9054
nuclear RNA export factor 1-like	NC_042494.1	167577888	+	2.02181e-05	0.0445365	40.8926
uncharacterized LOC100164664	NC_042496.1	33987212	+	1.48033e-05	0.0378121	40.879
LOC100159531	NC_042494.1	102924369	-	1.44061e-06	0.0112025	40.8665
protein cereblon-like	NC_042495.1	57515778	+	1.81483e-06	0.0126443	40.8509
cytoskeleton-associated protein 5-like	NC_042495.1	116125263	-	2.05276e-05	0.0448625	40.8462
f-box/LRR-repeat protein 6-like	NC_042494.1	90360148	+	1.32938e-06	0.0106609	40.8394
ankyrin-2-like	NC_042494.1	133615107	+	1.3989e-05	0.0368956	40.8213
uncharacterized LOC100160089	NC_042493.1	66492718	+	1.36649e-05	0.0363641	40.8163
N/A	NC_042496.1	20647243	+	3.38463e-07	0.00473232	40.8139
LOC100167978	NC_042494.1	130952618	+	4.34183e-06	0.0195857	40.7971
H(+)/Cl(-) exchange transporter 7-like	NC_042494.1	141224313	-	1.3619e-06	0.0108514	40.7963
uncharacterized LOC100165285	NC_042494.1	85976190	-	2.51097e-05	0.0491388	40.7895
pre-mRNA-processing factor 39-like	NC_042494.1	130407711	-	1.19065e-05	0.0340305	40.7672
N/A	NC_042495.1	48630325	-	1.53543e-05	0.0385102	40.7576
ATP-dependent zinc metalloprotease YME1 homolog	NC_042493.1	31745484	+	7.85201e-06	0.0272065	40.7553
LOC103311925	NC_042493.1	18677656	+	1.3078e-05	0.035562	40.7461
kynurenine--oxoglutarate transaminase 3-like	NC_042493.1	79033897	+	4.26671e-06	0.019504	40.7455
N/A	NC_042493.1	98427135	-	1.62405e-06	0.0117793	40.7449
protein daughterless-like	NC_042493.1	76624268	+	1.43402e-06	0.0111954	40.7407
u4/U6 small nuclear ribonucleoprotein Prp31-like	NC_042494.1	108767141	-	5.65185e-06	0.0226746	40.7407
heterogeneous nuclear ribonucleoprotein L-like	NC_042493.1	76759661	-	9.9362e-06	0.0309046	40.7343
membrane-associated protein Hem-like	NC_042493.1	58885733	-	2.31417e-06	0.0143006	40.7244
cytoplasmic dynein 1 intermediate chain-like	NC_042494.1	142572510	-	2.58284e-05	0.0495682	40.7143
alpha-actinin, sarcomeric-like	NC_042495.1	35018870	-	1.13157e-05	0.0329516	40.7018
# ubiquitin-like-specific protease 1 & uncharacterized LOC100569749	NC_042493.1	29729903	-	1.85246e-06	0.0127789	40.6993
uncharacterized LOC100160772	NC_042496.1	19080572	-	1.18813e-05	0.0339846	40.6832
tRNA (cytosine-5-)-methyltransferase-like	NC_042494.1	165463901	-	1.22823e-06	0.0101937	40.6818
# TNF receptor-associated factor 3 & RNA-binding protein cabeza	NC_042496.1	41152216	-	4.89896e-06	0.0208557	40.6791
uncharacterized LOC100163726	NC_042494.1	73679422	-	1.68414e-06	0.0121317	40.678
squamous cell carcinoma antigen recognized by T-cells 3-like	NC_042494.1	61574483	+	3.41516e-06	0.0173398	40.6312
uncharacterized LOC100167550	NC_042495.1	62116699	+	1.51772e-05	0.038235	40.6162
N/A	NC_042494.1	118904975	+	2.55735e-06	0.0150645	40.614
transmembrane GTPase Marf-like	NC_042495.1	81072219	-	5.82118e-06	0.022994	40.614
uncharacterized LOC100570445	NC_042496.1	30359150	-	1.23143e-05	0.034691	40.6038
N/A	NC_042493.1	71537114	+	1.59462e-05	0.0393024	40.602
FYVE, RhoGEF and PH domain-containing protein 6-like	NC_042493.1	1957517	+	8.80364e-06	0.0288508	40.5975
N/A	NC_042496.1	37297319	+	1.10791e-05	0.03258	40.5844
legumain-like	NC_042493.1	3993730	-	3.6358e-06	0.017944	40.566
NAD kinase-like	NC_042495.1	12157971	+	7.78768e-08	0.00184964	40.5633
uncharacterized LOC100168575	NC_042493.1	66566268	-	3.43775e-06	0.0173734	40.5556
serine/threonine-protein phosphatase 2A 65 kDa regulatory subunit A alpha isoform-like	NC_042495.1	12308468	-	1.88378e-06	0.0128832	40.5549
N/A	NC_042493.1	88451666	+	1.08253e-05	0.0322795	40.5547
uncharacterized LOC100573423	NC_042495.1	78088766	+	7.09246e-06	0.0256697	40.5449
WD repeat and FYVE domain-containing protein 3-like	NC_042494.1	133715844	+	1.91771e-05	0.0432664	40.5203
phosphatidylinositol-4-phosphate 5-kinase type-1 alpha-like	NC_042495.1	49027351	+	1.57717e-08	0.000731912	40.5128
N/A	NC_042495.1	102043647	-	2.50755e-05	0.0491075	40.5123
N/A	NC_042495.1	68730775	-	2.9091e-07	0.00429094	40.5032
N/A	NC_042493.1	63336267	-	2.08406e-06	0.0134959	40.4853
chitinase-3-like protein 2-like	NC_042496.1	5971808	+	2.1305e-05	0.0456431	40.4848
alpha,alpha-trehalose-phosphate synthase [UDP-forming] A-like	NC_042495.1	25422377	-	8.69822e-06	0.0287058	40.4762
activator of heat shock 90kDa protein ATPase-like	NC_042496.1	23875650	-	9.59332e-06	0.0302961	40.4762
diphosphoinositol polyphosphate phosphohydrolase 2-like	NC_042495.1	102666950	+	1.41238e-05	0.0370406	40.4728
rhomboid-related protein 3-like	NC_042496.1	39219828	-	1.41238e-05	0.0370406	40.4728
# phospholipase DDHD2 & uncharacterized LOC100575678	NC_042494.1	25588347	-	2.31942e-05	0.0475135	40.4562
ubiquitin carboxyl-terminal hydrolase 34-like	NC_042494.1	158360400	-	3.01798e-06	0.0163288	40.4472
Bloom syndrome protein homolog	NC_042493.1	82073255	-	8.67103e-07	0.00845388	40.4444
Vha16	NC_042494.1	152882630	+	4.44409e-06	0.0198901	40.4412
ribosome biogenesis protein WDR12 homolog	NC_042494.1	112657836	-	9.00998e-06	0.0291981	40.4386
zinc finger protein 845-like	NC_042495.1	109267850	+	3.06702e-06	0.0164504	40.4344
N/A	NW_021771377.1	38086	+	2.29302e-07	0.00368173	40.4274
uncharacterized LOC100573930	NC_042494.1	12033106	-	7.44726e-06	0.0263508	40.4175
uncharacterized LOC100166850	NC_042495.1	43626609	+	2.0729e-05	0.0450716	40.4167
uncharacterized LOC100573840	NC_042493.1	66628029	+	7.41371e-08	0.00179523	40.4131
sulfhydryl oxidase 1-like	NC_042495.1	72304649	-	2.44239e-05	0.0485302	40.4051
WD repeat-containing protein 19-like	NC_042496.1	21557763	-	1.8887e-05	0.0429282	40.4029
serine/threonine-protein phosphatase 2A 56 kDa regulatory subunit alpha isoform-like	NC_042493.1	67703439	+	4.35671e-06	0.0196409	40.3938
ATP-binding cassette sub-family G member 8-like	NC_042494.1	85494128	-	3.85315e-06	0.01835	40.3858
anoctamin-1-like	NC_042495.1	3767347	-	1.86862e-05	0.0426247	40.3846
N/A	NC_042496.1	2550196	+	8.36722e-06	0.0281712	40.3774
ubiquitin-conjugating enzyme E2 j2-like	NC_042494.1	94722561	-	2.45653e-05	0.0486389	40.3636
N/A	NC_042493.1	10928703	+	1.78285e-05	0.0415869	40.3571
serine/threonine-protein kinase TAO1-like	NC_042494.1	13760457	+	3.9618e-06	0.0186879	40.3509
uncharacterized LOC100569905	NC_042495.1	99013225	-	2.23798e-05	0.0467206	40.3497
uncharacterized LOC100163212	NC_042495.1	111182194	+	6.17087e-06	0.0236963	40.3488
N/A	NC_042493.1	122209473	+	1.05791e-05	0.0319148	40.3266
calcium-transporting ATPase type 2C member 1-like	NC_042494.1	13833498	-	1.78231e-06	0.0124998	40.3186
leucine-rich repeat protein soc-2 homolog	NC_042494.1	123191267	+	2.38695e-06	0.0145567	40.2646
cytoplasmic dynein 2 heavy chain 1-like	NC_042496.1	14189856	+	1.51842e-07	0.00288695	40.2511
rhomboid-related protein 3-like	NC_042496.1	39219909	-	1.3647e-05	0.03635	40.2439
huntingtin-like	NC_042495.1	8536741	-	1.45134e-05	0.0374583	40.2198
calcineurin-binding protein cabin-1-like	NC_042493.1	81904254	-	1.41896e-06	0.011139	40.2186
serine protease nudel-like	NC_042494.1	4752438	-	1.27983e-05	0.0351884	40.2174
possible pseudogene or miscRNA, No KEGG entry	NC_042495.1	83452912	+	1.77671e-05	0.0415458	40.2012
N/A	NC_042493.1	49378312	-	4.40262e-06	0.019776	40.1961
tyrosine-protein kinase Abl-like	NC_042495.1	84407744	-	1.38087e-06	0.0109544	40.1961
poly [ADP-ribose] polymerase 12-like	NC_042495.1	94188558	-	2.51086e-06	0.0149686	40.1882
protein phosphatase PTC7 homolog (EC:3.1.3.16)	NC_042495.1	76972236	+	1.39843e-06	0.0110713	40.1764
uncharacterized LOC100575183	NC_042495.1	40952815	+	3.78587e-06	0.0182539	40.1709
N/A	NC_042494.1	46151627	-	1.69102e-05	0.0404344	40.1667
armadillo segment polarity protein-like	NC_042496.1	22872683	+	1.60384e-05	0.0394278	40.1587
N/A	NC_042494.1	16357786	-	8.97554e-06	0.0291627	40.1547
# lysine-specific demethylase 3A & uncharacterized LOC100575399	NC_042493.1	71713332	+	2.14114e-05	0.0457	40.1526
N/A	NC_042495.1	84863677	+	1.05126e-05	0.0318056	40.152
# ribonuclease H1-like & chondroitin sulfate synthase 2	NC_042495.1	45003317	-	2.44883e-05	0.0485641	40.148
LOC100166344	NC_042494.1	42921300	-	8.07969e-06	0.0275526	40.1351
uncharacterized LOC100162043	NC_042494.1	160484722	-	9.33639e-09	0.00055746	40.1282
uncharacterized LOC100575022	NC_042493.1	21487689	-	5.89117e-06	0.0231966	40.1148
ubiquitin-like modifier-activating enzyme 5-like	NC_042494.1	66576292	+	9.17922e-07	0.00871494	40.1093
N/A	NW_021775511.1	39358	-	3.04794e-08	0.00108935	40.1014
LOC115034153	NC_042495.1	63357309	-	1.74396e-05	0.0411968	40.0966
uncharacterized LOC100162025	NC_042494.1	138706672	+	1.30476e-05	0.0355297	40.0642
Mterfd1	NC_042494.1	92514143	+	1.2641e-05	0.0351097	40.0621
katanin p80 WD40-containing subunit B1-like	NC_042493.1	78472321	-	1.45306e-06	0.0112522	40.0575
e3 UFM1-protein ligase 1 homolog	NC_042495.1	92777319	+	3.77463e-06	0.0182459	40.057
hrp65 protein-like	NC_042496.1	23903316	+	1.582e-06	0.0116211	40.0527
sphingomyelin phosphodiesterase-like	NC_042494.1	46784322	+	1.10397e-05	0.0325747	40.0517
DNA repair protein complementing XP-A cells-like	NC_042494.1	26276534	+	5.76142e-06	0.0228979	40.0245
probable cleavage and polyadenylation specificity factor subunit 2-like	NC_042493.1	82063328	-	1.77388e-05	0.0415341	40.007
uncharacterized LOC100571368	NC_042493.1	15908849	-	1.83515e-08	0.000795795	40
LOC100168135	NC_042493.1	68666107	+	5.76912e-06	0.0228979	40
N/A	NC_042494.1	127608983	-	8.77184e-06	0.028828	40
hypoxia-inducible factor 1-alpha inhibitor-like	NC_042494.1	128826504	-	2.37457e-09	0.000258125	40
uncharacterized LOC100167279	NC_042494.1	141701794	-	2.72529e-09	0.000268428	40
mini-chromosome maintenance complex-binding protein-like	NC_042495.1	56135665	-	5.25388e-09	0.000390574	40
N/A	NC_042495.1	102038056	+	7.8371e-07	0.00791861	40
gastrula zinc finger protein xFG20-1-like	NC_042495.1	102318405	+	1.79855e-05	0.0417697	40
tyrosine-protein phosphatase non-receptor type 21-like	NC_042496.1	964724	-	6.44983e-06	0.0242776	40
splicing factor 3A subunit 1-like	NC_042494.1	125554907	-	8.93439e-06	0.0291054	39.9555
LOC100158840	NC_042496.1	17238343	-	6.24263e-06	0.0238601	39.951
piwi-like protein 1-like	NC_042493.1	69144032	+	7.56651e-06	0.0266081	39.946
DNA topoisomerase 2-like	NC_042494.1	55110837	-	2.35174e-07	0.00375976	39.916
LOC100160819	NC_042495.1	75596591	+	9.68214e-06	0.0304988	39.899
LOC107884320	NC_042496.1	24580333	-	3.12366e-08	0.00110938	39.8935
Samdc	NC_042495.1	12621810	-	1.25765e-05	0.0350296	39.8887
tyrosine-protein kinase Abl-like	NC_042495.1	84403844	-	2.39772e-05	0.0481748	39.8551
exocyst complex component sec3-like	NC_042495.1	96226021	-	4.45689e-07	0.0056348	39.8443
uncharacterized LOC100569905	NC_042495.1	99013099	+	3.49467e-06	0.0175063	39.8347
N/A	NC_042495.1	11269061	-	2.42042e-07	0.00381408	39.8291
LOC107884318	NC_042494.1	108632509	-	1.61993e-05	0.0396268	39.8278
abnormal spindle-like microcephaly-associated protein homolog	NC_042494.1	23647796	-	9.68004e-07	0.0089952	39.8224
uncharacterized LOC100166720	NC_042493.1	89054748	+	1.6917e-07	0.00308995	39.821
chromodomain-helicase-DNA-binding protein Mi-2 homolog	NC_042494.1	55972041	-	5.72865e-08	0.00155796	39.819
uncharacterized LOC100572364	NC_042493.1	65508157	+	1.67546e-06	0.0120809	39.8126
splicing factor U2AF 50 kDa subunit-like	NC_042494.1	105156429	+	4.48249e-07	0.00565754	39.8111
protein FAM73B-like	NC_042493.1	120491408	+	2.61814e-05	0.0498804	39.8062
ankyrin-2-like	NC_042494.1	69870823	+	2.61814e-05	0.0498804	39.8062
cadherin-87A-like	NC_042495.1	1580003	+	5.95448e-06	0.0232943	39.8028
serine/threonine-protein kinase N2-like	NC_042495.1	60170192	-	2.02647e-06	0.0132969	39.7942
DEP domain-containing protein 5-like	NC_042493.1	151201	+	9.93192e-06	0.0309046	39.7939
FYVE, RhoGEF and PH domain-containing protein 6-like	NC_042493.1	1957520	+	2.56741e-05	0.0495682	39.7904
uncharacterized LOC100573840	NC_042493.1	66623822	-	1.14863e-05	0.0331997	39.7904
protein ST7 homolog	NC_042493.1	4549959	+	5.51477e-06	0.0224244	39.7773
pumilio homolog 2-like	NC_042494.1	141479642	-	2.95245e-06	0.0161387	39.7746
RILP-like protein homolog	NC_042494.1	82954112	-	5.05242e-07	0.00614727	39.7625
uncharacterized protein C11orf46 homolog	NC_042493.1	87186324	-	5.98642e-06	0.0233001	39.7594
uncharacterized LOC100534629	NC_042495.1	68814714	-	5.98642e-06	0.0233001	39.7594
huntingtin-interacting protein 1-like	NC_042494.1	71209344	+	2.25101e-05	0.0468636	39.7463
uncharacterized LOC100164863	NC_042494.1	55031723	-	4.14945e-07	0.00540076	39.7418
uncharacterized LOC100168156	NC_042495.1	636170	+	1.23679e-05	0.0347524	39.7403
aryl hydrocarbon receptor nuclear translocator homolog	NC_042495.1	81790918	-	1.063e-06	0.00939635	39.7377
probable phospholipid hydroperoxide glutathione peroxidase	NC_042496.1	39891716	+	1.80185e-06	0.0125657	39.7368
bifunctional aminoacyl-tRNA synthetase-like	NC_042493.1	29685454	-	2.41878e-05	0.0483988	39.7301
Williams-Beuren syndrome chromosomal region 14 protein homolog	NC_042496.1	9769399	+	1.65798e-05	0.0401012	39.73
uncharacterized LOC100163947	NC_042494.1	89864748	+	1.4922e-06	0.0113242	39.7199
uncharacterized LOC100166817	NC_042496.1	34808431	+	1.4731e-05	0.0376842	39.7004
# endoribonuclease Dcr-1 & endoribonuclease Dcr-1	NC_042495.1	75245822	+	2.0702e-05	0.0450442	39.6875
tyrosine-protein phosphatase non-receptor type 21-like	NC_042496.1	964900	+	7.56039e-06	0.0265992	39.6874
LOC100164947	NC_042493.1	42392862	+	1.38707e-05	0.036717	39.686
methylthioribose-1-phosphate isomerase-like	NC_042494.1	87924076	+	8.33489e-07	0.00824955	39.6853
Yipf6	NC_042494.1	55043445	+	1.71366e-05	0.0407399	39.6797
ATP-dependent DNA helicase Q1-like	NC_042494.1	152500065	-	1.28169e-05	0.0351884	39.6481
ruvB-like 2-like	NC_042495.1	98874533	-	1.2252e-05	0.0346186	39.6248
Polr2j	NC_042494.1	120012115	-	9.52975e-06	0.030236	39.619
rho GTPase-activating protein 190-like	NC_042493.1	77329359	+	5.37287e-06	0.0220918	39.5946
N/A	NC_042495.1	102337718	-	2.1031e-05	0.0453729	39.5918
serologically defined colon cancer antigen 1 homolog	NC_042493.1	54999851	-	2.37127e-05	0.0478763	39.5862
uncharacterized LOC100161757	NC_042493.1	65612656	+	1.18259e-05	0.0339305	39.5848
rho guanine nucleotide exchange factor 7-like	NC_042493.1	87623743	-	7.43494e-06	0.0263323	39.5833
uncharacterized LOC100163803	NC_042496.1	37659032	+	1.32486e-05	0.0358082	39.5833
N/A	NC_042493.1	52920577	-	2.41549e-06	0.0145635	39.5825
phosphoglucomutase-2-like	NC_042494.1	69096516	-	2.59898e-05	0.0497685	39.5768
N/A	NC_042493.1	88375019	-	2.23688e-05	0.0467155	39.5745
N/A	NW_021765771.1	7204	-	8.70584e-06	0.0287131	39.5726
N/A	NC_042494.1	102798144	-	2.6495e-06	0.015424	39.5671
LOC103309118	NC_042493.1	80485937	+	4.78512e-06	0.0206099	39.5529
DNA polymerase eta-like	NC_042493.1	75650295	-	5.75074e-06	0.0228979	39.5522
NIP3 homolog	NC_042495.1	689672	+	1.26469e-05	0.0351097	39.5503
WW domain-binding protein 2-like	NC_042495.1	106880272	+	1.59491e-05	0.0393024	39.5455
WW domain-binding protein 11-like	NC_042496.1	15209484	-	2.26959e-07	0.00365198	39.5448
N/A	NC_042494.1	167058911	+	2.61296e-06	0.0152831	39.5372
possible pseudogene or miscRNA, No KEGG entry	NC_042496.1	12261533	+	8.82225e-07	0.00852161	39.5349
LOC103308066	NC_042495.1	108185720	+	1.86483e-06	0.0128202	39.5192
polyubiquitin-A-like	NC_042496.1	40269424	-	6.05855e-07	0.00682415	39.5166
N/A	NC_042493.1	85418120	+	6.23034e-07	0.006944	39.4926
transcriptional activator Myb-like	NC_042494.1	42138195	-	9.74165e-07	0.00900481	39.4886
N/A	NC_042495.1	102038920	-	2.41417e-05	0.0483541	39.4841
uncharacterized protein CG10915-like	NC_042493.1	65670699	-	1.27212e-05	0.0351884	39.4545
uncharacterized LOC100163167	NC_042494.1	78467288	-	5.56135e-06	0.02247	39.4518
uncharacterized LOC100573660	NC_042493.1	66610122	+	1.56928e-08	0.000731912	39.4505
uncharacterized LOC100568635	NC_042493.1	102611475	-	1.84457e-07	0.00320593	39.4444
ATP-dependent zinc metalloprotease YME1 homolog	NC_042493.1	31750814	-	2.32525e-06	0.0143452	39.4421
zinc finger CCHC domain-containing protein 4-like	NC_042494.1	27987640	-	3.97701e-06	0.0187121	39.4231
erythroid differentiation-related factor 1-like	NC_042494.1	158963051	+	2.53316e-06	0.0150493	39.4124
N/A	NC_042493.1	84492944	-	9.28995e-06	0.0297808	39.4024
g2/mitotic-specific cyclin-B-like	NC_042494.1	110341102	+	3.83974e-06	0.0183362	39.399
THO complex subunit 4	NC_042494.1	17469630	-	9.19087e-07	0.00871494	39.3939
Fbxo5	NC_042494.1	46781449	-	2.94961e-07	0.00429654	39.3739
AN1-type zinc finger protein 1-like	NC_042496.1	5286019	+	2.3086e-05	0.0474094	39.3678
protein argonaute-2-like	NC_042494.1	114580400	+	2.4384e-05	0.0485302	39.3617
partitioning defective protein 6-like	NC_042496.1	15238128	-	1.14122e-05	0.0330662	39.3561
transcription elongation regulator 1-like	NC_042495.1	101508590	-	3.05359e-06	0.0164198	39.3515
N/A	NC_042495.1	36583045	-	1.39915e-05	0.0368956	39.3478
N/A	NC_042495.1	110901422	+	4.04043e-06	0.0189029	39.3396
# splicing factor 3B subunit 5 & RNA polymerase II-associated protein 1	NC_042494.1	162226889	+	6.31738e-06	0.0239548	39.3357
myosin regulatory light chain-like	NC_042494.1	154751932	+	2.60824e-05	0.0498089	39.3281
N/A	NC_042494.1	152992196	+	1.06045e-06	0.009385	39.3237
protein tweety-like	NC_042495.1	60518280	+	8.2714e-06	0.0279753	39.3208
DOMON domain-containing protein CG14681-like	NC_042495.1	51793585	+	1.96432e-05	0.0438786	39.3021
ATP-binding cassette sub-family F member 1-like	NC_042494.1	96663983	-	1.9422e-05	0.0436122	39.2982
uncharacterized LOC100167337	NC_042494.1	31436750	+	1.6492e-05	0.0399636	39.2857
uncharacterized LOC100161608	NC_042494.1	167389002	+	8.25145e-06	0.027946	39.2857
ankyrin repeat domain-containing protein 13B-like	NC_042494.1	91917888	+	3.95991e-06	0.0186879	39.2823
neuralized-like protein 4-like	NC_042494.1	129636354	+	1.30061e-05	0.0354361	39.2593
uncharacterized LOC100571935	NC_042494.1	87311150	-	2.02224e-05	0.0445365	39.2583
uncharacterized LOC100158735	NC_042494.1	58718158	-	2.84761e-07	0.00423509	39.2573
# caspase-1 & uncharacterized LOC115034022	NC_042495.1	97590626	-	7.70928e-07	0.00787238	39.2557
d-beta-hydroxybutyrate dehydrogenase, mitochondrial-like	NC_042493.1	76474998	+	1.38527e-05	0.0367135	39.2473
uncharacterized LOC100571463	NC_042493.1	15928617	-	2.02101e-05	0.0445365	39.2424
DNA-directed RNA polymerase, mitochondrial-like	NC_042494.1	78386841	-	1.00362e-05	0.0310483	39.2375
uncharacterized LOC100166781	NC_042494.1	141432687	-	8.92856e-06	0.0290991	39.2308
centromere protein J-like	NC_042495.1	8552289	-	1.92286e-06	0.0129632	39.2205
ras-related protein Rab-43-like	NC_042494.1	138474955	-	5.26991e-08	0.00151113	39.2196
solute carrier family 22 member 5-like	NC_042495.1	40178919	-	2.4481e-05	0.0485641	39.1925
CD109 antigen-like	NC_042494.1	26440354	-	7.11223e-06	0.0257162	39.1717
e3 ubiquitin-protein ligase UBR1-like	NC_042496.1	6314513	-	1.92566e-06	0.0129668	39.1641
uncharacterized LOC100569295	NC_042493.1	1523957	-	5.37624e-06	0.0220935	39.1598
26S proteasome non-ATPase regulatory subunit 1-like	NC_042494.1	1416597	+	3.20205e-06	0.0168114	39.1534
uncharacterized LOC100570440	NC_042493.1	72462419	-	5.94303e-06	0.0232755	39.1509
LOC100163269	NC_042495.1	107494746	+	2.8533e-06	0.0158768	39.1484
uncharacterized LOC100163547	NC_042495.1	34724951	-	1.53731e-05	0.0385444	39.1304
integrin alpha-PS1-like	NC_042493.1	61180641	+	2.41196e-06	0.0145635	39.1266
tyrosine-protein phosphatase 10D-like	NC_042493.1	80343474	-	2.62091e-05	0.0498819	39.1052
telomerase-binding protein EST1A-like	NC_042494.1	71611971	+	4.84355e-06	0.0207414	39.0975
uncharacterized LOC100161660	NC_042494.1	84246220	-	6.06347e-06	0.0234649	39.092
4-coumarate--CoA ligase 3-like	NC_042494.1	160222179	+	2.50962e-06	0.0149686	39.0909
LOC103307700	NC_042496.1	33587365	-	8.97554e-06	0.0291627	39.086
N/A	NC_042496.1	42058396	+	1.09325e-06	0.00953662	39.0411
EF-hand calcium-binding domain-containing protein 1-like	NC_042495.1	89795494	-	1.221e-06	0.0101532	39.0388
N/A	NC_042493.1	6901135	-	4.62599e-06	0.0203249	39.0351
uncharacterized LOC100161391	NC_042493.1	34160828	-	1.0664e-05	0.0320892	39.0334
f-box only protein 28-like	NC_042494.1	145572057	-	1.61326e-05	0.0395315	39.0278
vesicle transport protein GOT1B-like	NC_042495.1	76392229	-	4.92783e-07	0.00604515	39.0051
uncharacterized LOC100572761	NC_042493.1	16649229	+	3.46073e-06	0.0174146	38.9978
N/A	NW_021765771.1	7192	-	8.69469e-06	0.0287058	38.9765
activator of heat shock 90kDa protein ATPase-like	NC_042496.1	23875598	+	6.32751e-06	0.0239548	38.9654
eukaryotic translation initiation factor 4 gamma 3-like	NC_042495.1	8388581	+	1.78713e-05	0.0416606	38.9372
DNA-directed RNA polymerase II subunit RPB1-like	NC_042494.1	162235579	-	1.50727e-06	0.0113313	38.9361
N/A	NC_042496.1	2427852	-	5.03085e-06	0.0212015	38.9208
uncharacterized LOC100160657	NC_042494.1	114071985	+	1.64906e-05	0.0399636	38.9193
N/A	NC_042495.1	102337807	-	6.72807e-06	0.0248392	38.9114
N/A	NC_042495.1	102149916	-	4.13838e-06	0.0191324	38.9011
uncharacterized LOC100166510	NC_042495.1	102795839	+	4.13129e-06	0.0191114	38.8992
uncharacterized LOC100574823	NC_042493.1	66479701	-	7.58352e-06	0.0266427	38.897
transketolase-like protein 2-like	NC_042493.1	53981083	-	2.32305e-05	0.0475485	38.8966
set1/Ash2 histone methyltransferase complex subunit ASH2-like	NC_042495.1	4558175	+	7.16148e-09	0.000471138	38.89
LOC100166344	NC_042494.1	42923459	-	2.19335e-07	0.00357024	38.8889
uncharacterized LOC100167707	NC_042493.1	31081434	+	8.31968e-06	0.0280875	38.8868
uncharacterized LOC100570902	NC_042494.1	48042669	-	2.17323e-05	0.0460417	38.8856
uncharacterized LOC100569048	NC_042493.1	55893443	-	1.14135e-05	0.0330662	38.8824
LOC115033014	NC_042494.1	92618151	+	1.06773e-05	0.0320968	38.8551
N/A	NC_042494.1	117842267	+	2.88434e-06	0.0159659	38.8508
DNA-directed RNA polymerase I subunit RPA1-like	NC_042494.1	128988178	+	3.8323e-06	0.018333	38.8501
protein scribble homolog	NC_042495.1	103830775	-	2.27936e-06	0.0141613	38.8421
polyphosphoinositide phosphatase-like	NC_042496.1	29461652	+	1.28217e-05	0.0351884	38.8406
uncharacterized LOC100574764	NC_042494.1	85132492	-	6.16589e-06	0.0236963	38.8331
spermatogenesis-associated protein 20-like	NC_042495.1	14808309	+	4.5079e-06	0.020043	38.833
transcription initiation factor TFIID subunit 6-like	NC_042494.1	58329221	+	1.88856e-06	0.0128898	38.8269
LOC107883076	NC_042493.1	95313177	+	3.3113e-07	0.00466656	38.8176
low-density lipoprotein receptor-related protein 1-like	NC_042494.1	3282898	-	1.55616e-05	0.0388335	38.8172
a-kinase anchor protein 17A-like	NC_042494.1	92463926	-	1.87747e-05	0.0427347	38.8105
condensin-2 complex subunit D3-like	NC_042495.1	75158395	-	3.26392e-06	0.0169922	38.8031
vesicle transport protein GOT1B-like	NC_042495.1	76392275	+	1.78528e-07	0.00316068	38.8031
uncharacterized LOC100569295	NC_042493.1	1500266	-	9.10766e-07	0.00870969	38.8023
polyadenylate-binding protein 2-like	NC_042495.1	19130149	+	1.11659e-06	0.00960731	38.7968
fat-like cadherin-related tumor suppressor homolog	NC_042494.1	77956616	-	5.07472e-06	0.0213259	38.7956
BTB/POZ domain-containing protein 10-like	NC_042495.1	75113243	+	2.38142e-05	0.048016	38.7931
N/A	NC_042494.1	127880535	+	1.28437e-05	0.0351884	38.7879
Mvd	NC_042495.1	71911522	+	1.05462e-05	0.0318702	38.7821
lipase maturation factor 2-like	NC_042495.1	87589305	+	6.07046e-07	0.00682722	38.7755
uncharacterized LOC100169379	NC_042494.1	110056104	+	1.79084e-05	0.0416767	38.7363
mitochondrial intermediate peptidase-like	NC_042495.1	74219478	+	1.34328e-05	0.0360505	38.7164
trans-2,3-enoyl-CoA reductase-like	NC_042495.1	78082272	+	1.34328e-05	0.0360505	38.7164
# homeobox protein extradenticle & uncharacterized LOC115033731	NC_042494.1	53367513	+	2.54543e-06	0.0150493	38.7097
DNA repair and recombination protein RAD54-like	NC_042494.1	157815507	+	6.31564e-07	0.0069926	38.6912
N/A	NC_042493.1	100589302	+	8.90692e-06	0.0290645	38.6905
cell division cycle protein 23 homolog	NC_042494.1	141418087	-	1.32775e-05	0.0358538	38.6754
N/A	NC_042494.1	170128411	-	6.03344e-06	0.0234126	38.6667
protein LTV1 homolog	NC_042495.1	50332559	+	9.12645e-06	0.0294302	38.6667
spectrin beta chain-like	NC_042495.1	119445578	+	1.07979e-05	0.0322247	38.6364
uncharacterized LOC100572787	NC_042493.1	68959278	+	1.06686e-05	0.0320892	38.6335
# carboxypeptidase N subunit 2 & WD repeat-containing protein 35	NC_042494.1	148667475	-	1.05205e-05	0.0318056	38.6235
N/A	NC_042494.1	165604431	-	1.30695e-05	0.035562	38.611
zinc finger protein 544-like	NC_042495.1	84582949	+	2.56766e-05	0.0495682	38.5876
uncharacterized LOC100162043	NC_042494.1	160485033	+	2.82446e-07	0.00421629	38.5575
EF-hand domain-containing protein D2-like	NC_042494.1	65273069	-	8.55467e-06	0.0285131	38.5307
possible pseudogene or miscRNA, No KEGG entry	NC_042493.1	89306432	+	9.44553e-06	0.0300856	38.5294
# probable serine/threonine-protein kinase nek3 & uncharacterized LOC100169243	NC_042494.1	118603687	+	9.92265e-06	0.0308899	38.5185
uncharacterized LOC100161816	NC_042495.1	13725307	-	2.11247e-05	0.0454394	38.5158
N/A	NC_042494.1	120268074	+	1.69597e-06	0.0121933	38.4997
uncharacterized LOC100163389	NC_042495.1	107032874	-	1.58706e-05	0.0392461	38.4771
TATA element modulatory factor-like	NC_042495.1	107062108	-	2.81389e-08	0.00104072	38.4599
sulfhydryl oxidase 1-like	NC_042495.1	72302102	-	1.24574e-05	0.0348418	38.4472
DNA polymerase subunit gamma-2, mitochondrial-like	NC_042495.1	74315397	+	5.24852e-06	0.021831	38.4389
angiomotin-like protein 1-like	NC_042494.1	36357875	+	3.27153e-06	0.0169956	38.4208
protein Wnt-16-like	NC_042493.1	47042176	-	7.41992e-06	0.0262916	38.4127
uncharacterized LOC100167121	NC_042495.1	79122344	+	1.55841e-05	0.0388555	38.4121
uncharacterized LOC100169563	NC_042495.1	116756023	-	3.38914e-07	0.00473232	38.3838
serine/threonine-protein kinase NLK-like	NC_042495.1	106352916	+	1.65928e-05	0.0401012	38.382
latrophilin Cirl-like	NC_042493.1	80650792	-	2.02492e-05	0.0445365	38.3808
cysteine protease ATG4B-like	NC_042493.1	32590742	-	4.71987e-06	0.0204473	38.3794
N/A	NC_042495.1	4228370	-	1.68515e-05	0.0404111	38.3592
1-acyl-sn-glycerol-3-phosphate acyltransferase alpha-like	NC_042496.1	15844931	-	1.57267e-05	0.039036	38.3576
Tssc4	NC_042495.1	38565526	+	2.12744e-05	0.0456171	38.3533
DNA primase large subunit-like	NC_042493.1	35022932	-	2.36239e-05	0.0478401	38.3399
N/A	NC_042495.1	102307355	+	1.44201e-05	0.0374215	38.3205
DTW domain-containing protein 1	NC_042493.1	88376716	-	9.31063e-06	0.0298146	38.3117
ectoderm-neural cortex protein 2-like	NC_042493.1	58336772	-	1.07707e-05	0.0322033	38.3082
u1 small nuclear ribonucleoprotein 70 kDa-like	NC_042494.1	68109165	-	3.72214e-09	0.000328702	38.2979
LOC103310567	NC_042493.1	72375997	+	3.61056e-07	0.00490994	38.2963
plexin-B-like	NC_042493.1	84492984	-	5.94042e-06	0.0232755	38.2828
N/A	NC_042494.1	131910517	+	1.92772e-05	0.0434129	38.2773
putative ankyrin repeat protein L25-like	NC_042494.1	168195606	+	3.31442e-07	0.00466656	38.2768
ornithine decarboxylase antizyme 1-like	NC_042494.1	145535503	+	3.97226e-06	0.0187016	38.2692
LOC103309639	NC_042494.1	42937506	-	1.93367e-07	0.00328947	38.2675
TFIIH basal transcription factor complex helicase XPD subunit-like	NC_042496.1	5300062	-	9.58385e-06	0.0302961	38.2653
probable methylthioribulose-1-phosphate dehydratase-like	NC_042495.1	106619766	+	3.76663e-06	0.0182459	38.2646
protein hu-li tai shao-like	NC_042493.1	78149142	-	2.13661e-05	0.045671	38.2617
uncharacterized LOC100569762	NC_042493.1	60930096	-	1.38283e-05	0.036675	38.2576
putative ribosomal RNA methyltransferase NOP2-like	NC_042495.1	37051223	-	6.32144e-06	0.0239548	38.2353
UDP-glucose pyrophosphorylase 2-like	NC_042495.1	86717290	+	1.05081e-05	0.0318056	38.2353
serine protease nudel-like	NC_042494.1	4761256	+	2.00114e-06	0.0132001	38.2222
heterogeneous nuclear ribonucleoprotein L-like	NC_042493.1	76759648	-	1.19025e-05	0.0340305	38.2219
intraflagellar transport protein 88 homolog	NC_042494.1	64719259	+	7.11998e-06	0.0257192	38.1916
ATP-binding cassette sub-family F member 3-like	NC_042494.1	109024403	+	1.66756e-05	0.0401849	38.1828
# meiotic nuclear division protein 1 homolog & optic atrophy 3 protein homolog	NC_042494.1	45246442	+	3.48342e-07	0.00481334	38.1818
uncharacterized LOC100163434	NC_042496.1	22992867	-	8.97083e-07	0.00860029	38.1762
vesicle transport protein GOT1B-like	NC_042495.1	76392257	-	1.78326e-07	0.00316068	38.1696
N/A	NC_042493.1	74691945	-	2.94181e-06	0.0161279	38.1481
acyl carrier protein, mitochondrial-like	NC_042495.1	89306322	-	1.38495e-05	0.0367135	38.1356
N/A	NC_042496.1	20647224	+	4.76593e-06	0.020563	38.1287
uncharacterized LOC100166462	NC_042494.1	108803580	-	9.84898e-06	0.0307584	38.125
structural maintenance of chromosomes protein 2-like	NC_042495.1	76090465	-	1.02265e-05	0.031441	38.1099
rho guanine nucleotide exchange factor 18-like	NC_042496.1	19341821	-	5.52437e-06	0.0224294	38.1053
# calmodulin-A & general transcription and DNA repair factor IIH helicase subunit XPB	NC_042496.1	25074328	+	1.72871e-05	0.0409609	38.0952
Vha16	NC_042494.1	152882598	+	2.17859e-05	0.0460585	38.0769
uncharacterized LOC100573780	NC_042495.1	47429281	+	3.03333e-06	0.0163761	38.0673
phosphorylated CTD-interacting factor 1-like	NC_042493.1	93100165	+	2.79113e-06	0.0157192	38.0615
leucine-rich repeat-containing protein 68-like	NC_042495.1	1111017	-	1.65587e-05	0.0400709	38.0597
lymphocyte-specific helicase-like	NC_042493.1	85937305	-	7.92874e-06	0.0273135	38.0471
uncharacterized protein CG42248-like	NC_042494.1	68666170	-	5.41096e-06	0.0221748	38.0421
uncharacterized LOC100572738	NC_042496.1	7175185	-	1.80658e-05	0.0418515	38.0273
aspartyl-tRNA synthetase, mitochondrial (EC:6.1.1.12)	NC_042493.1	2994894	+	6.73113e-06	0.0248392	38.0236
serine/threonine-protein kinase PINK1, mitochondrial-like	NC_042496.1	36764443	+	6.73113e-06	0.0248392	38.0236
N/A	NC_042494.1	58679632	-	4.99563e-06	0.021149	38.022
uncharacterized LOC100569933	NC_042493.1	9948663	+	1.20858e-05	0.0342795	38
tuberin-like	NW_021771488.1	462665	-	4.18695e-06	0.0192969	38
nuclear pore complex protein Nup85-like	NC_042494.1	119116545	-	1.40621e-05	0.0370177	37.987
LOC100169142	NC_042494.1	112689102	-	1.9175e-05	0.0432664	37.9659
LOC115035124	NC_042493.1	125600930	+	2.1153e-05	0.0454612	37.928
uncharacterized LOC100163203	NC_042493.1	82745681	+	2.60043e-05	0.0497685	37.9273
uncharacterized LOC100570006	NC_042495.1	39116791	-	2.34534e-05	0.0476967	37.9234
lysine-specific demethylase 4A-like	NC_042494.1	70355462	-	2.15573e-05	0.0458363	37.9083
pyridoxal kinase-like	NC_042494.1	122945305	-	1.49109e-05	0.0379311	37.9006
uncharacterized LOC100168132	NC_042493.1	67150536	+	5.22191e-06	0.0217478	37.8968
uncharacterized LOC100167840	NC_042494.1	6494411	-	3.44811e-06	0.017414	37.8793
transcription factor GAGA-like	NC_042494.1	156796475	+	2.73099e-06	0.0156171	37.8788
N/A	NC_042494.1	157937695	-	1.20165e-05	0.034161	37.8788
alanyl-tRNA synthetase, cytoplasmic-like	NC_042495.1	106833852	-	5.30575e-06	0.0219249	37.8776
uncharacterized LOC100534630	NC_042496.1	24512637	-	7.53052e-08	0.00180587	37.875
# actin-histidine N-methyltransferase & probable serine/threonine-protein kinase nek3	NC_042494.1	104407243	-	4.52305e-06	0.0200743	37.8648
uncharacterized LOC100169128	NC_042495.1	84037616	+	1.15986e-06	0.00979113	37.8632
N/A	NC_042493.1	29204120	-	1.01842e-05	0.0313836	37.8571
sex-regulated protein janus-A	NC_042496.1	40522610	-	8.69976e-06	0.0287058	37.8571
N/A	NC_042493.1	97650953	-	7.46982e-08	0.00179723	37.8378
inosine-5'-monophosphate dehydrogenase-like	NC_042493.1	68613273	-	6.51935e-06	0.0244279	37.8261
Ctsl	NC_042496.1	40312333	+	3.41684e-06	0.0173398	37.8225
N/A	NC_042496.1	27604904	-	4.88646e-06	0.0208557	37.821
kinase D-interacting substrate of 220 kDa-like	NC_042494.1	108671671	+	1.12954e-05	0.0329516	37.8205
membrane-associated protein Hem-like	NC_042493.1	58885572	-	5.00061e-06	0.021158	37.8125
acetyl-CoA acetyltransferase, cytosolic-like	NC_042496.1	40222873	+	2.30728e-05	0.0473952	37.807
mothers against decapentaplegic homolog 4-like	NC_042493.1	124309621	-	1.7131e-05	0.0407397	37.78
uncharacterized LOC100166785	NC_042494.1	72429731	+	1.17077e-05	0.0336695	37.7778
leucine-rich repeat and WD repeat-containing protein KIAA1239-like	NC_042495.1	7942374	-	3.29514e-06	0.0170349	37.7778
# diphthine methyltransferase & DNA replication licensing factor Mcm5	NC_042494.1	140305722	-	1.51999e-05	0.038235	37.7516
f-box/LRR-repeat protein 20-like	NC_042495.1	4001693	-	3.77737e-06	0.0182459	37.7504
serine/threonine-protein phosphatase 6 catalytic subunit (EC:3.1.3.16)	NC_042495.1	97189990	-	2.04317e-05	0.0447762	37.7381
inositol-3-phosphate synthase 1-like	NC_042495.1	109300908	+	2.04317e-05	0.0447762	37.7381
apoptosis 1 inhibitor-like	NC_042493.1	23966529	+	2.03086e-05	0.0446273	37.7369
guanine nucleotide exchange factor DBS-like	NC_042494.1	43357843	+	2.39154e-05	0.0481157	37.7143
dysbindin-like	NC_042494.1	31291608	+	1.45704e-05	0.0375	37.7119
dystrophin, isoforms A/C/F/G/H-like	NC_042496.1	8420992	+	1.45298e-05	0.0374701	37.7083
ADP-ribosylation factor-like protein	NC_042495.1	58978668	+	2.89522e-06	0.0160028	37.6923
uncharacterized LOC100166091	NC_042493.1	31318483	-	2.36837e-05	0.0478763	37.6842
WD repeat and FYVE domain-containing protein 3-like	NC_042494.1	133724049	-	1.41368e-06	0.0111338	37.679
programmed cell death 6-interacting protein-like	NC_042494.1	145595753	-	1.51684e-05	0.038235	37.6696
N/A	NC_042495.1	35154721	+	1.94876e-05	0.0436755	37.6588
cytoplasmic dynein 1 intermediate chain-like	NC_042494.1	142567974	+	3.72955e-06	0.0181688	37.6419
alanyl-tRNA synthetase, cytoplasmic-like	NC_042495.1	106833901	-	4.89408e-06	0.0208557	37.6252
protein unc-79 homolog	NC_042495.1	92482119	+	8.00619e-06	0.0273954	37.6245
N/A	NC_042495.1	71592181	+	3.39079e-06	0.0172903	37.6173
LOC103309202	NC_042494.1	13107423	+	1.51809e-05	0.038235	37.6114
# Aagab & phenylalanine--tRNA ligase alpha subunit-like	NC_042495.1	51553210	-	4.17836e-06	0.019273	37.6096
vacuolar protein sorting-associated protein 13B-like	NC_042494.1	86606055	+	1.46286e-05	0.0375645	37.594
mTERF domain-containing protein 2-like	NC_042495.1	78143439	+	1.54008e-05	0.038588	37.5758
zinc finger protein Xfin-like	NC_042496.1	36009889	-	1.72588e-05	0.0409199	37.5758
ATP-dependent RNA helicase DHX8-like	NC_042495.1	38636863	-	1.35604e-06	0.0108396	37.554
segment polarity protein dishevelled homolog DVL-3-like	NC_042495.1	51113255	+	7.02374e-06	0.0255013	37.5489
uncharacterized LOC100161038	NC_042496.1	38205127	-	1.52271e-06	0.0113768	37.5484
adenylosuccinate synthetase-like	NC_042493.1	51271207	-	1.86713e-05	0.0426127	37.5385
origin recognition complex subunit 3-like	NC_042494.1	125337346	-	1.63539e-05	0.0398476	37.5303
# probable glutamate receptor & NFX1-type zinc finger-containing protein 1	NC_042493.1	56237939	+	2.389e-06	0.0145573	37.5286
uncharacterized LOC100162477	NC_042494.1	21069554	+	1.49262e-07	0.00285983	37.5256
dynein heavy chain, cytoplasmic-like	NC_042494.1	19339085	-	2.26909e-05	0.0470087	37.5
uncharacterized LOC100160811	NC_042494.1	152713325	-	6.7165e-08	0.00168228	37.5
uncharacterized LOC100169084	NC_042493.1	75387027	+	1.81537e-05	0.0419115	37.4889
beta-1,4-mannosyltransferase egh-like	NC_042496.1	33605536	-	2.0959e-05	0.0453452	37.4844
integrin-linked protein kinase-like	NC_042494.1	87440649	-	1.9312e-06	0.0129718	37.4737
probable ATP-dependent RNA helicase DDX56-like	NC_042494.1	51932889	-	8.9883e-06	0.029166	37.4447
uncharacterized LOC100166397	NC_042493.1	60908245	+	1.00274e-05	0.0310469	37.4383
N/A	NC_042493.1	47163025	+	1.42099e-05	0.0371188	37.4305
trafficking kinesin-binding protein milt-like	NC_042496.1	9699257	+	1.79119e-05	0.0416767	37.4269
mediator of RNA polymerase II transcription subunit 17-like	NC_042495.1	84430939	-	9.18606e-07	0.00871494	37.4202
LOC115034098	NC_042495.1	25491806	+	6.72426e-06	0.0248392	37.4183
beclin 1-associated autophagy-related key regulator-like	NC_042493.1	65419560	-	1.64184e-05	0.0399132	37.4135
uncharacterized protein CG12001-like	NC_042494.1	16673294	+	1.14863e-06	0.00975215	37.4003
LOC100168983	NC_042494.1	155630665	+	6.01852e-07	0.0068204	37.3965
casein kinase I isoform gamma-3-like	NC_042495.1	112143972	-	3.23159e-06	0.0168943	37.3854
N/A	NC_042494.1	161267464	-	4.2328e-06	0.0194359	37.3701
N/A	NC_042493.1	6180919	-	2.59847e-06	0.0152439	37.3626
protein argonaute-2-like	NC_042494.1	114566607	+	1.50197e-06	0.0113242	37.3499
uncharacterized LOC100168960	NC_042493.1	91933196	+	2.46403e-05	0.0486912	37.3292
ankyrin repeat domain-containing protein 54-like	NC_042496.1	5546448	+	2.57512e-05	0.0495682	37.3253
LOC100163269	NC_042495.1	107486805	+	4.7469e-06	0.0205047	37.3211
uncharacterized LOC100160178	NC_042493.1	57932474	+	1.41778e-05	0.0371119	37.3144
DNA2-like helicase-like	NC_042494.1	56333259	-	8.33599e-06	0.0280999	37.307
LOC100163269	NC_042495.1	107493654	-	7.6058e-06	0.0266706	37.2967
ribosomal protein L31	NC_042495.1	115765542	+	1.44241e-07	0.00278969	37.2938
neuronal membrane glycoprotein M6-a-like	NC_042493.1	55986134	-	2.59467e-07	0.00400183	37.276
uncharacterized LOC100572364	NC_042493.1	65507226	-	1.69051e-05	0.0404344	37.2727
ATP-dependent helicase brm-like	NC_042494.1	97958162	-	1.93454e-10	5.75256e-05	37.2663
Ctsf	NC_042494.1	158279964	+	7.38471e-06	0.0262168	37.2549
NADPH--cytochrome P450 reductase-like	NC_042495.1	69815527	-	5.09126e-06	0.0213833	37.2515
uncharacterized LOC100166129	NC_042496.1	33662806	+	5.38223e-06	0.0221059	37.25
signal transducer and activator of transcription 5B-like	NC_042494.1	106126590	+	2.4491e-05	0.0485641	37.2485
zinc finger protein 91-like	NC_042494.1	127972891	-	2.10932e-05	0.0453987	37.2459
eukaryotic translation initiation factor 1A-like	NC_042494.1	93045387	-	3.15867e-06	0.0166654	37.2349
microtubule-actin cross-linking factor 1, isoforms 1/2/3/5-like	NC_042495.1	45130184	+	7.02535e-06	0.0255013	37.2253
neuroglian-like	NC_042494.1	46639629	-	3.96443e-06	0.0186884	37.2227
probable phenylalanyl-tRNA synthetase beta chain-like	NC_042495.1	112044378	+	5.9423e-07	0.00678898	37.2074
coiled-coil domain-containing protein 43-like	NC_042496.1	37681650	-	1.95369e-05	0.0437331	37.2042
LOC100166344	NC_042494.1	42921352	-	1.19893e-05	0.0341437	37.1986
dyslexia-associated protein KIAA0319-like protein-like	NC_042494.1	93074393	+	2.05967e-05	0.0449548	37.1931
# carboxypeptidase N subunit 2 & Rps3a	NC_042494.1	148640124	+	7.33869e-07	0.00770564	37.1597
LOC107884932	NC_042495.1	22625943	+	1.17006e-05	0.0336618	37.1542
membrane-associated protein Hem-like	NC_042493.1	58885616	-	1.05994e-05	0.0319349	37.1535
N/A	NC_042493.1	57911860	-	5.61853e-06	0.0225897	37.1435
hydroxymethylglutaryl-CoA synthase 1-like	NC_042493.1	67759569	-	3.04347e-06	0.0163951	37.1377
uncharacterized LOC100161429	NC_042494.1	107441354	+	1.22616e-05	0.0346327	37.1212
axin-related protein-like	NC_042494.1	50633449	+	1.53016e-06	0.0114095	37.1208
galactosylceramide sulfotransferase-like	NC_042494.1	18475207	-	7.40526e-06	0.0262522	37.1178
probable NADH dehydrogenase [ubiquinone] iron-sulfur protein 6, mitochondrial-like	NC_042494.1	32537918	+	1.15546e-05	0.0333451	37.1156
transcriptional regulator ATRX homolog	NC_042494.1	160592206	-	1.61072e-05	0.0395238	37.1152
histone-arginine methyltransferase CARMER-like	NC_042493.1	67788698	-	1.75886e-07	0.00315622	37.111
Fanconi anemia group A protein-like	NC_042495.1	56533125	-	1.7658e-05	0.041497	37.0968
uncharacterized LOC100160852	NC_042494.1	100783580	-	1.93132e-05	0.043468	37.0936
LOC107884546	NC_042495.1	102233975	-	9.75486e-06	0.0305983	37.0879
uncharacterized LOC100162526	NC_042495.1	43463353	-	9.03227e-06	0.0292448	37.0714
serpin B4-like	NC_042495.1	95340253	-	6.85959e-06	0.0251547	37.0588
N/A	NC_042494.1	158376549	-	4.6561e-06	0.020337	37.0445
N/A	NC_042496.1	42058400	+	2.00329e-05	0.0444584	37.037
wee1-like protein kinase 2-like	NC_042495.1	107140924	+	1.79644e-05	0.0417697	37
regulator of nonsense transcripts 1-like	NC_042494.1	23669654	+	2.63723e-07	0.00404232	36.9931
uncharacterized LOC100574987	NC_042494.1	65259964	-	2.52595e-05	0.0492827	36.99
ATP-binding cassette sub-family F member 1-like	NC_042494.1	96662172	-	4.81468e-06	0.0207012	36.9853
LOC103310162	NC_042493.1	880459	+	3.70842e-06	0.0181252	36.9844
lysine-specific demethylase 6A-like	NC_042494.1	90191938	+	1.72619e-05	0.0409199	36.9815
N/A	NC_042495.1	63216507	-	4.27068e-06	0.019504	36.981
possible pseudogene or miscRNA, No KEGG entry	NC_042496.1	29442521	+	1.19571e-05	0.0341094	36.9748
ultraspiracle	NC_042493.1	78548213	-	6.04993e-06	0.023449	36.9505
possible pseudogene or miscRNA, No KEGG entry	NC_042493.1	79066986	-	1.40173e-05	0.0369127	36.9447
DNA mismatch repair protein Mlh1-like	NC_042495.1	83675118	-	2.39828e-06	0.0145635	36.9424
6-phosphofructo-2-kinase/fructose-2,6-biphosphatase-like	NC_042494.1	46674387	+	1.45732e-05	0.0375	36.9418
60S ribosomal protein L21-like	NC_042495.1	1338913	+	9.4441e-06	0.0300856	36.9268
protein dopey-1 homolog	NC_042494.1	53550874	-	1.80918e-05	0.0418752	36.8852
structural maintenance of chromosomes protein 1A-like	NC_042494.1	157786226	-	1.504e-05	0.0380919	36.8852
microtubule-actin cross-linking factor 1, isoforms 1/2/3/5-like	NC_042495.1	45121950	-	2.61621e-05	0.0498804	36.8771
ornithine decarboxylase-like	NC_042495.1	5654971	-	1.92072e-06	0.0129632	36.875
WD repeat domain 61-like	NC_042496.1	34973110	+	1.12933e-05	0.0329516	36.8745
DNA topoisomerase 2-like	NC_042494.1	55112213	-	2.48025e-05	0.0488689	36.8672
N/A	NC_042495.1	93025538	+	1.68481e-05	0.0404111	36.8611
WD repeat-containing protein 44-like	NC_042494.1	92561478	+	1.61909e-06	0.0117657	36.8421
uncharacterized LOC100571088	NC_042493.1	58449489	+	1.37338e-05	0.0364764	36.8339
uncharacterized LOC100164208	NC_042494.1	145652925	+	3.9286e-06	0.0186115	36.8299
uncharacterized LOC100168714	NC_042493.1	34691841	+	9.8597e-06	0.0307584	36.8297
uncharacterized LOC100168445	NC_042493.1	15973573	+	3.22591e-07	0.00458536	36.8242
protein FAM73B-like	NC_042493.1	120490912	-	2.17325e-05	0.0460417	36.8235
N/A	NC_042493.1	67148145	+	8.33675e-06	0.0280999	36.8184
transcription termination factor 2-like	NC_042495.1	19065218	+	1.76106e-06	0.0124446	36.8169
uncharacterized LOC100168909	NC_042494.1	52728471	+	7.69819e-07	0.00787238	36.8168
mannose-P-dolichol utilization defect 1 protein homolog	NC_042493.1	75981195	+	7.72658e-06	0.0269865	36.8143
N/A	NC_042495.1	111982714	-	2.44283e-05	0.0485302	36.8035
thioredoxin domain-containing protein 11-like	NC_042494.1	140729077	+	2.01598e-05	0.0445242	36.7988
N/A	NC_042493.1	6191306	+	1.92593e-05	0.0433952	36.7981
serine/threonine-protein phosphatase 4 regulatory subunit 3-like	NC_042495.1	38326150	-	2.66257e-06	0.0154517	36.7857
leucine-rich repeat protein soc-2 homolog	NC_042494.1	123191313	+	4.91711e-06	0.0209118	36.7692
xylosyltransferase oxt-like	NC_042495.1	1838988	+	5.97188e-06	0.0233001	36.7589
dual specificity protein phosphatase 3-like	NC_042495.1	43501782	-	1.44959e-05	0.0374583	36.7488
cation-independent mannose-6-phosphate receptor-like	NC_042495.1	103879777	-	7.76851e-06	0.0270594	36.7389
N/A	NC_042493.1	1550529	+	1.60129e-05	0.0394043	36.7282
ultraspiracle	NC_042493.1	78539250	+	1.59451e-07	0.0029858	36.7072
N/A	NC_042493.1	72371483	-	1.64435e-05	0.0399352	36.7042
uncharacterized LOC100168816	NC_042496.1	21728507	-	3.12498e-06	0.0165857	36.7029
membrane-bound transcription factor site-2 protease-like	NC_042495.1	46542361	-	3.41729e-08	0.00118711	36.694
uncharacterized LOC100571531	NC_042493.1	79541798	+	1.58068e-05	0.0391753	36.6926
proton-coupled folate transporter-like	NC_042493.1	115407597	+	1.04282e-06	0.00928963	36.689
dehydrogenase/reductase SDR family protein 7-like	NC_042494.1	70679422	+	7.24846e-06	0.0259752	36.6827
N/A	NC_042494.1	122404617	+	1.68789e-05	0.0404344	36.6778
# protein UXT homolog & polyprenol reductase	NC_042494.1	163534900	-	9.49977e-07	0.00887336	36.6667
LOC100165052	NC_042495.1	1037735	-	7.20537e-06	0.0258893	36.6667
LOC107884550	NC_042495.1	102254479	+	8.73132e-06	0.0287589	36.6538
protein TAPT1 homolog	NC_042496.1	7287883	-	7.46439e-06	0.0263863	36.6282
protein suppressor of forked-like	NC_042496.1	5417656	-	1.49544e-05	0.0379555	36.6246
adrenodoxin, mitochondrial-like	NC_042495.1	103395828	-	9.82218e-06	0.0307284	36.619
coiled-coil domain-containing protein 102A-like	NC_042494.1	155272943	+	1.46415e-05	0.0375846	36.6071
uncharacterized LOC100569986	NC_042495.1	2935226	-	7.32319e-06	0.0260981	36.6071
transmembrane protein 129-like	NC_042495.1	105789588	+	2.16068e-07	0.003538	36.5854
N/A	NC_042494.1	117842251	+	9.15468e-06	0.0294998	36.5817
mediator of RNA polymerase II transcription subunit 15-like	NC_042495.1	118817313	-	1.52034e-05	0.038235	36.5766
proto-oncogene tyrosine-protein kinase ROS-like	NC_042495.1	65450350	-	2.42973e-05	0.0485031	36.5646
low-density lipoprotein receptor-related protein 5-like	NC_042493.1	29347409	-	1.90813e-05	0.0431945	36.5613
transcription termination factor 2-like	NC_042495.1	19058360	-	2.1861e-05	0.0461166	36.5566
ATP-dependent RNA helicase SUV3 homolog, mitochondrial-like	NC_042494.1	13853637	+	1.36031e-06	0.0108514	36.5461
N/A	NC_042494.1	28385750	+	3.13398e-08	0.00110938	36.5385
carboxypeptidase D-like	NC_042495.1	11371479	-	1.8188e-06	0.0126483	36.5385
uncharacterized LOC100165448	NC_042494.1	141256949	+	2.15113e-05	0.0457867	36.5375
N/A	NC_042494.1	67986388	+	8.18328e-07	0.00817289	36.5325
uncharacterized LOC100570267	NC_042494.1	68540912	-	1.13299e-05	0.0329784	36.5263
putative ankyrin repeat protein L25-like	NC_042495.1	27609814	+	2.09382e-05	0.0453276	36.5
# ring canal kelch homolog & kelch-like protein 3	NC_042494.1	168916576	+	7.97559e-08	0.00187037	36.4881
uncharacterized LOC100168927	NC_042495.1	72082218	+	1.10601e-06	0.00958421	36.4226
uncharacterized LOC100168934	NC_042494.1	92713596	-	8.06227e-06	0.0275119	36.4103
protein SYS1 homolog	NC_042496.1	15801364	-	7.15587e-07	0.00758948	36.4099
cyclin-related protein FAM58A-like	NC_042495.1	78615804	-	2.65926e-08	0.000998436	36.3636
zinc finger protein 567-like	NC_042494.1	147292612	-	9.44574e-06	0.0300856	36.3475
LOC103308647	NC_042496.1	41956881	+	1.88007e-05	0.0427547	36.3445
reticulon-4-interacting protein 1 homolog, mitochondrial-like	NC_042495.1	86091780	+	2.62026e-06	0.0153138	36.3441
LITAF-like protein	NC_042494.1	152524844	+	1.11891e-05	0.0327391	36.3426
N/A	NC_042495.1	47221247	+	1.51864e-05	0.038235	36.3415
muskelin-like	NC_042494.1	25457872	+	5.25129e-06	0.021831	36.3356
pre-mRNA-splicing factor CWC22 homolog	NC_042495.1	2375582	+	3.93308e-06	0.0186115	36.3122
phosphatidylserine decarboxylase proenzyme-like	NC_042495.1	103808296	-	1.02857e-05	0.0315446	36.3095
uncharacterized LOC100168816	NC_042496.1	21729127	-	1.62726e-05	0.0397366	36.3095
uncharacterized LOC100168425	NC_042496.1	23750593	+	1.56604e-05	0.0389363	36.3095
endoplasmin-like	NC_042496.1	40795314	-	5.06056e-06	0.0212982	36.3082
uncharacterized LOC100159693	NC_042494.1	18427429	+	5.80807e-06	0.0229816	36.2822
uncharacterized LOC100573660	NC_042493.1	66610258	+	2.04479e-05	0.0447879	36.2812
ubiquitin conjugation factor E4 A-like	NC_042495.1	76951343	+	1.05867e-05	0.0319148	36.2773
uncharacterized protein CG12001-like	NC_042494.1	16673828	-	1.28539e-07	0.00262516	36.2753
26S proteasome non-ATPase regulatory subunit 14-like	NC_042495.1	7781381	-	2.5703e-05	0.0495682	36.2716
exocyst complex component 7-like	NC_042495.1	101920507	+	2.98516e-06	0.0162171	36.2626
probable ATP-dependent RNA helicase spindle-E-like	NC_042496.1	9489686	-	3.88435e-07	0.00516571	36.2626
Vasa4	NC_042494.1	161288880	-	7.37651e-08	0.00179523	36.2522
LOC107883076	NC_042493.1	95314087	+	2.0841e-05	0.0452357	36.25
tyrosine-protein phosphatase non-receptor type 21-like	NC_042496.1	976745	-	4.85415e-07	0.00598439	36.2411
uncharacterized LOC100166817	NC_042496.1	34808406	+	3.41709e-06	0.0173398	36.2353
uncharacterized LOC100570073	NC_042494.1	28491509	+	2.55192e-05	0.0495145	36.2069
N/A	NC_042493.1	103857886	-	9.06788e-06	0.0293171	36.2051
LOC100163013	NC_042494.1	165405899	-	1.38715e-05	0.036717	36.2028
probable cation-transporting ATPase 13A3-like	NC_042495.1	67260980	-	7.60459e-06	0.0266706	36.2003
6-phosphofructo-2-kinase/fructose-2,6-biphosphatase-like	NC_042494.1	46674219	+	8.85255e-06	0.028953	36.1995
protein SERAC1-like	NC_042494.1	56055405	-	2.11773e-05	0.0454612	36.1905
thymidylate synthase-like	NC_042494.1	153715444	+	2.35121e-05	0.0477437	36.1905
bicaudal	NC_042495.1	92309245	-	1.66806e-07	0.00306496	36.1905
bifunctional aminoacyl-tRNA synthetase-like	NC_042493.1	28408086	-	2.50366e-05	0.049096	36.1632
protein DDI1 homolog 2-like	NC_042495.1	49843699	-	4.17173e-06	0.0192686	36.1629
uncharacterized LOC100165448	NC_042494.1	141257033	+	2.56598e-05	0.0495682	36.1598
Cact	NC_042494.1	103285230	+	2.23589e-05	0.0467155	36.155
LOC107883669	NC_042494.1	124622777	-	8.99252e-06	0.0291669	36.1538
probable cleavage and polyadenylation specificity factor subunit 2-like	NC_042493.1	82062699	+	1.76941e-05	0.041497	36.1458
ankyrin-2-like	NC_042494.1	69857757	-	1.00548e-06	0.00908493	36.1386
transcription termination factor 2-like	NC_042495.1	19066408	-	3.84038e-06	0.0183362	36.1358
uncharacterized glycosyltransferase AER61-like	NC_042493.1	51234169	+	1.30257e-06	0.0105254	36.1176
N/A	NC_042493.1	14491360	-	2.18343e-06	0.0138598	36.1111
LOC100164040	NC_042495.1	116095979	-	5.91962e-06	0.0232604	36.1111
protein pellino-like	NC_042493.1	76825187	+	6.66084e-07	0.00728169	36.1095
AN1-type zinc finger protein 2B-like	NC_042494.1	98551575	+	1.76076e-05	0.0414226	36.0998
lysine-specific demethylase 8-like	NC_042495.1	8562220	-	1.35532e-05	0.0362181	36.0977
uncharacterized LOC100575936	NC_042495.1	25729038	+	6.79695e-06	0.0250047	36.0878
nucleobindin-2-like	NC_042494.1	2760083	-	8.35127e-07	0.00824955	36.0805
muskelin-like	NC_042494.1	25452903	-	2.52646e-05	0.0492827	36.0764
caspase-1-like	NC_042495.1	43047132	-	2.52646e-05	0.0492827	36.0764
LOC107883485	NC_042495.1	69594224	-	1.23836e-05	0.0347663	36.074
N/A	NC_042493.1	57911839	-	1.94097e-05	0.0436122	36.039
SWI/SNF complex subunit SMARCC2-like	NC_042494.1	19234470	+	5.81186e-06	0.0229816	36.034
diacylglycerol kinase eta-like	NC_042494.1	39755844	-	4.88945e-06	0.0208557	36.0156
LOC100164947	NC_042493.1	42392539	+	1.10744e-05	0.03258	36.0099
N/A	NC_042495.1	47036656	-	2.5775e-05	0.0495682	36
uncharacterized LOC100575168	NC_042493.1	34758614	+	1.13663e-05	0.0330243	35.9959
e3 ubiquitin-protein ligase SHPRH-like	NC_042495.1	86071751	+	1.24922e-06	0.0102729	35.9863
serine/threonine-protein kinase 6-A-like	NC_042496.1	15102813	-	1.6351e-06	0.0118243	35.9776
protein CIP2A-like	NC_042494.1	151861823	-	1.3482e-05	0.0361563	35.9761
LOC103308877	NC_042493.1	41975033	+	2.01286e-05	0.0445215	35.9641
Parva	NC_042495.1	39992420	-	2.04448e-07	0.00342075	35.9557
DNA2-like helicase-like	NC_042494.1	56333193	-	1.34132e-05	0.036024	35.9518
uncharacterized LOC100160854	NC_042493.1	67885012	-	6.26036e-06	0.0238787	35.945
N/A	NC_042494.1	168186164	+	1.13874e-05	0.0330552	35.9375
nuclear distribution protein nudE homolog 1-like	NC_042494.1	123445327	-	6.34975e-06	0.0239936	35.9231
OTU domain-containing protein 7B-like	NC_042494.1	130148683	-	1.25978e-05	0.0350364	35.9184
N/A	NC_042493.1	60318580	-	8.10421e-06	0.0275856	35.9091
LOC100158926	NC_042495.1	71990853	+	2.21691e-05	0.0465158	35.9056
uncharacterized LOC100162954	NC_042494.1	53266026	-	7.79919e-07	0.00790987	35.8974
# uncharacterized LOC107883737 & uncharacterized LOC115033730	NC_042494.1	51917528	+	3.35811e-06	0.0172385	35.8965
uncharacterized LOC100165491	NC_042496.1	32792414	+	3.58427e-06	0.0178112	35.8734
# protein UXT homolog & KICSTOR complex protein kaptin	NC_042494.1	163540684	+	9.82249e-06	0.0307284	35.8612
N/A	NC_042496.1	33802403	-	1.07858e-06	0.00947772	35.8486
uncharacterized LOC100160291	NC_042495.1	63370908	+	1.4131e-05	0.0370406	35.8333
LOC100164040	NC_042495.1	116070437	-	8.91012e-06	0.0290645	35.8277
uncharacterized LOC100162883	NC_042495.1	85939208	+	2.0394e-06	0.0133459	35.8083
zinc transporter 7-like	NC_042493.1	66616948	-	2.17161e-06	0.013846	35.7843
# protein SMG9 & eukaryotic translation initiation factor 3 subunit L	NC_042494.1	133509509	-	1.11255e-05	0.0326777	35.7843
N/A	NC_042496.1	23009248	+	2.31754e-05	0.0475135	35.7778
proton-coupled folate transporter-like	NC_042493.1	125605143	+	2.68838e-07	0.00408702	35.7771
disintegrin and metalloproteinase domain-containing protein 10-like	NC_042496.1	18634900	-	1.94398e-05	0.0436122	35.7642
possible pseudogene or miscRNA, No KEGG entry	NC_042493.1	122211333	-	2.05036e-05	0.0448625	35.7143
kelch-like protein 17-like	NC_042495.1	24773868	-	2.32818e-05	0.0476093	35.7143
uncharacterized LOC100165745	NC_042495.1	77112446	-	1.33411e-05	0.0359022	35.7143
e3 ubiquitin-protein ligase SHPRH-like	NC_042495.1	86073639	+	9.23448e-07	0.00874513	35.7143
N/A	NW_021769950.1	36731	+	1.66854e-05	0.0401943	35.6964
transcription factor E2F2-like	NC_042494.1	142176079	+	1.4841e-06	0.0113213	35.6909
solute carrier family 35 member C2-like	NC_042495.1	115698694	-	6.25328e-06	0.0238787	35.6887
possible pseudogene or miscRNA, No KEGG entry	NC_042493.1	29818470	+	2.42352e-05	0.0484235	35.6808
CCR4-NOT transcription complex subunit 6-like	NC_042496.1	41782783	+	2.06389e-05	0.0449777	35.6275
Ndufs8	NC_042496.1	7169626	+	8.53997e-07	0.00836447	35.6132
proteasome alpha 4 subunit-like	NC_042495.1	93467798	-	2.4151e-05	0.0483541	35.609
OTU domain-containing protein 5-like	NC_042493.1	84528933	-	1.67302e-05	0.040263	35.5952
uncharacterized LOC100572153	NC_042496.1	9845507	-	2.36846e-05	0.0478763	35.5666
BRCA1-associated protein-like	NC_042494.1	69218657	-	8.50487e-06	0.0284476	35.5556
protein argonaute-2-like	NC_042494.1	114556187	-	1.2029e-05	0.0341703	35.5556
60S ribosomal export protein NMD3-like	NC_042495.1	25499762	-	4.54945e-06	0.0201422	35.5311
possible pseudogene or miscRNA, No KEGG entry	NC_042494.1	64191983	+	1.52309e-05	0.0382782	35.5128
10 kDa heat shock protein, mitochondrial-like	NC_042495.1	115555046	-	1.59266e-05	0.0393024	35.491
protein ST7 homolog	NC_042493.1	4551381	+	1.09553e-05	0.0324739	35.4795
LOC100160819	NC_042495.1	75608799	-	5.27632e-06	0.0219008	35.4592
N/A	NC_042494.1	106812902	+	8.61203e-06	0.0286324	35.4497
uncharacterized LOC100573273	NC_042495.1	95963862	+	2.57725e-05	0.0495682	35.4396
# N-acetylneuraminate 9-O-acetyltransferase & Mir184b	NC_042495.1	85889479	-	2.84096e-06	0.0158312	35.4281
uncharacterized LOC100569917	NC_042496.1	33942291	-	3.30294e-07	0.00466656	35.4167
activin receptor type-2B-like	NC_042494.1	58059900	-	8.40901e-06	0.0282411	35.4123
uncharacterized LOC100162845	NC_042495.1	53293414	+	1.3735e-06	0.0109088	35.4106
uncharacterized LOC100163657	NC_042495.1	52044380	+	1.32229e-05	0.0357918	35.4005
MPN domain-containing protein CG4751-like	NC_042493.1	76392897	+	2.36915e-05	0.0478763	35.3968
alpha-tubulin N-acetyltransferase-like	NC_042496.1	40014932	+	1.70706e-05	0.0406552	35.3799
ras-related protein M-Ras-like	NC_042495.1	42765704	-	2.75789e-06	0.0156682	35.3666
thioredoxin domain-containing protein 11-like	NC_042494.1	140730288	-	9.97838e-06	0.0309468	35.3571
N/A	NC_042494.1	46137387	-	1.22048e-05	0.0345115	35.3535
uncharacterized LOC100162602	NC_042494.1	70016660	+	2.32604e-05	0.0475835	35.307
uncharacterized LOC100159827	NC_042494.1	27344680	-	1.3704e-05	0.0364251	35.2995
N/A	NC_042495.1	975967	+	1.49275e-06	0.0113242	35.2941
N/A	NC_042496.1	25424993	+	1.54966e-05	0.0387493	35.2239
rap guanine nucleotide exchange factor 2-like	NC_042495.1	51768789	+	1.52243e-05	0.0382744	35.2163
f-box/LRR-repeat protein 20-like	NC_042495.1	4002294	-	2.52711e-05	0.0492827	35.2104
glycerol-3-phosphate acyltransferase 1, mitochondrial-like	NC_042495.1	108428295	-	2.52711e-05	0.0492827	35.2104
sugar phosphate exchanger 2-like	NC_042493.1	6778237	+	1.58496e-05	0.0392101	35.2047
ATP-binding cassette sub-family F member 3-like	NC_042494.1	109026169	+	2.22516e-06	0.013983	35.2041
LOC100168908	NC_042494.1	110327117	+	1.29421e-05	0.035346	35.1852
SID1 transmembrane family member 1-like	NC_042494.1	45572710	+	8.05448e-06	0.0275044	35.1757
ankyrin repeat domain-containing protein 13B-like	NC_042494.1	91917812	+	1.128e-06	0.00963857	35.1754
uncharacterized LOC100161424	NC_042494.1	50297671	-	2.35321e-05	0.0477581	35.1716
dystrophin, isoforms A/C/F/G/H-like	NC_042496.1	8409648	+	8.59897e-06	0.0286145	35.1648
Golgi to ER traffic protein 4 homolog	NC_042495.1	72066294	+	9.71808e-06	0.0305416	35.1559
trafficking kinesin-binding protein milt-like	NC_042496.1	9722810	-	1.83582e-05	0.0421872	35.1532
vinculin-like	NC_042495.1	49511642	+	1.9098e-06	0.0129582	35.1429
uncharacterized LOC100161440	NC_042494.1	152543081	-	4.80143e-06	0.0206682	35.1393
N/A	NW_021771377.1	38088	+	2.53428e-05	0.0493836	35.1389
ACYPI53115	NC_042495.1	75666929	-	8.23935e-06	0.0279305	35.1304
N/A	NC_042495.1	6900551	-	7.73713e-06	0.0269911	35.1218
zinc finger protein 84-like	NC_042496.1	3148723	+	9.95143e-06	0.0309166	35.1064
laminin subunit alpha-1-like	NC_042493.1	13333401	+	4.67124e-06	0.0203553	35.1038
uncharacterized LOC100572992	NC_042494.1	158173992	+	1.4333e-05	0.0372889	35.101
microtubule-actin cross-linking factor 1, isoforms 1/2/3/5-like	NC_042495.1	45126629	+	1.74462e-05	0.0411993	35.0743
uncharacterized LOC100167834	NC_042496.1	9356826	-	2.08044e-05	0.0451694	35.0694
60S ribosomal export protein NMD3-like	NC_042495.1	25499756	-	1.10679e-05	0.03258	35.0676
adenylosuccinate synthetase-like	NC_042493.1	51272898	+	3.58342e-07	0.00489692	35.0649
UPF0505 protein C16orf62 homolog	NC_042495.1	85428271	+	1.19724e-06	0.0100003	35.0251
interferon-related developmental regulator 2-like	NC_042495.1	89619623	-	1.49745e-06	0.0113242	35.0201
RNA (guanine-9-)-methyltransferase domain-containing protein 2-like	NC_042496.1	4426328	-	1.39038e-05	0.0367441	35.0118
hemicentin-2-like	NC_042494.1	48053873	-	9.52584e-08	0.00211389	35.0084
ancient ubiquitous protein 1-like	NC_042495.1	95817746	-	2.16976e-05	0.0459939	35.0037
zinc finger CCCH-type containing 15	NC_042495.1	104437836	-	2.6025e-05	0.0497685	34.9715
aminopeptidase N-like	NC_042496.1	2395059	+	1.3143e-06	0.0105742	34.9598
cyclic AMP-responsive element-binding protein 1-like	NC_042495.1	5584197	-	1.6864e-05	0.0404281	34.9428
possible pseudogene or miscRNA, No KEGG entry	NC_042493.1	80622054	+	2.19231e-05	0.0461822	34.9376
N/A	NC_042493.1	82813749	+	4.49191e-06	0.0200002	34.9206
chitinase-3-like protein 2-like	NC_042496.1	5971758	+	2.16885e-05	0.0459878	34.9153
prefoldin subunit 1-like	NC_042495.1	116533691	-	1.94791e-06	0.013034	34.908
# proton-coupled amino acid transporter 4-like & myotubularin-related protein 4	NC_042496.1	6163841	+	2.47672e-05	0.0488252	34.898
mps one binder kinase activator-like 2-like	NC_042493.1	18277621	-	5.52013e-06	0.0224244	34.8953
N/A	NC_042496.1	20646620	-	5.01782e-07	0.00611518	34.8923
mitochondrial dicarboxylate carrier-like	NC_042494.1	43289605	+	2.3705e-05	0.0478763	34.8391
microtubule-actin cross-linking factor 1, isoforms 1/2/3/5-like	NC_042495.1	45126619	+	1.03089e-05	0.0315853	34.8301
uncharacterized LOC100573423	NC_042495.1	78088856	+	1.35023e-05	0.0361808	34.8276
hsp70-binding protein 1-like	NC_042493.1	125244851	+	2.69111e-06	0.0155409	34.8165
e3 ubiquitin-protein ligase HERC2-like	NC_042495.1	45659542	+	1.84359e-05	0.0423133	34.7985
uncharacterized LOC100169079	NC_042493.1	23012068	-	1.87918e-05	0.0427475	34.7826
reversion-inducing cysteine-rich protein with Kazal motifs-like	NC_042494.1	26991791	-	7.79836e-07	0.00790987	34.7826
# ring canal kelch homolog & kelch-like protein 3	NC_042494.1	168916569	+	7.90379e-06	0.0272654	34.7679
uncharacterized LOC100573514	NC_042495.1	68682226	+	2.16336e-05	0.0459106	34.7588
putative sodium-dependent multivitamin transporter-like	NC_042495.1	115040587	+	8.26692e-07	0.0082161	34.7403
LOC100167963	NC_042495.1	62383734	+	2.15616e-05	0.0458363	34.7093
alpha,alpha-trehalose-phosphate synthase [UDP-forming] A-like	NC_042495.1	78688040	+	1.81192e-05	0.0418993	34.6753
tetratricopeptide repeat protein 28-like	NC_042496.1	30287794	+	2.44025e-06	0.014677	34.6751
Bloom syndrome protein homolog	NC_042493.1	82070265	-	5.50485e-06	0.0224237	34.6732
uncharacterized LOC100167834	NC_042496.1	9365473	-	8.94829e-07	0.00859454	34.6667
NV7	NC_042494.1	70541426	+	5.31394e-06	0.0219345	34.6635
cell division cycle 7-related protein kinase-like	NC_042495.1	42812730	-	1.59455e-05	0.0393024	34.6627
uncharacterized LOC100167964	NC_042494.1	70606357	-	3.02687e-06	0.0163606	34.6514
dynactin subunit 1-like	NC_042495.1	106252135	+	1.06921e-05	0.0321283	34.6465
protein hu-li tai shao-like	NC_042493.1	78140639	-	1.68149e-05	0.0403625	34.6154
LOC100575143	NC_042494.1	37171595	-	2.36887e-09	0.000258125	34.6154
uncharacterized LOC100168934	NC_042494.1	92713564	-	2.05824e-06	0.0134102	34.6154
uncharacterized LOC100163695	NC_042495.1	103436913	-	1.13417e-05	0.0329998	34.6154
protein-S-isoprenylcysteine O-methyltransferase-like	NC_042495.1	67576582	-	1.032e-05	0.0315853	34.5946
possible pseudogene or miscRNA, No KEGG entry	NC_042494.1	30203963	+	4.94463e-06	0.0210049	34.5942
uncharacterized LOC100570658	NW_021770191.1	6337	+	4.65054e-06	0.0203333	34.5854
uncharacterized LOC100164827	NC_042493.1	85270623	-	8.39701e-06	0.0282245	34.5764
axin-related protein-like	NC_042494.1	50633490	+	4.31554e-07	0.0055409	34.5704
transcription factor Dp-1-like	NC_042494.1	160197527	+	3.91566e-06	0.0185763	34.5694
tolloid-like protein 2-like	NC_042494.1	96722606	+	4.3599e-06	0.0196434	34.5293
N/A	NC_042495.1	86734427	-	1.05839e-05	0.0319148	34.4919
anaphase-promoting complex subunit 10-like	NC_042494.1	142771296	-	1.48809e-05	0.0378723	34.4828
dynactin subunit 1-like	NC_042495.1	106253993	-	2.55354e-05	0.0495231	34.4528
uncharacterized LOC100166285	NC_042494.1	122912390	-	1.98631e-05	0.0442237	34.4444
transcription factor IIB-like	NC_042495.1	54205886	-	1.78915e-05	0.0416767	34.4055
e3 ubiquitin-protein ligase SHPRH-like	NC_042495.1	86083823	-	5.51351e-06	0.0224244	34.3956
LIM domain-containing protein unc-97-like	NC_042495.1	54859666	-	2.25336e-05	0.0468837	34.3939
RING finger protein 146-like	NC_042495.1	16043386	+	2.06493e-05	0.0449777	34.3935
uncharacterized LOC100575408	NC_042493.1	70505009	+	1.82174e-05	0.0419934	34.3889
mitogen-activated protein kinase kinase kinase 15-like	NC_042494.1	129467857	-	2.8336e-06	0.0158254	34.387
seryl-tRNA synthetase, cytoplasmic-like	NC_042494.1	40311069	+	1.80165e-05	0.041806	34.3728
zinc finger protein Xfin-like	NC_042496.1	36011823	+	7.85743e-06	0.0272065	34.3647
uncharacterized protein CG10915-like	NC_042493.1	65673116	+	1.18069e-05	0.0338891	34.3631
egl nine homolog 1-like	NC_042494.1	61503159	-	1.18069e-05	0.0338891	34.3631
hypoxia up-regulated protein 1-like	NC_042494.1	107450505	+	2.022e-05	0.0445365	34.3583
mitochondrial ribonuclease P protein 3-like	NC_042494.1	89300119	-	2.02379e-05	0.0445365	34.3565
N/A	NC_042493.1	91549675	-	1.28885e-05	0.0352773	34.3493
Yipf6	NC_042494.1	55043574	-	1.96495e-06	0.0131009	34.3434
uncharacterized LOC100162883	NC_042495.1	85939596	-	9.07398e-06	0.0293171	34.3341
stress-induced-phosphoprotein 1-like	NC_042494.1	103325340	+	2.26226e-05	0.0469374	34.324
N/A	NC_042494.1	73834652	+	4.55156e-06	0.0201422	34.3228
cytoplasmic phosphatidylinositol transfer protein 1-like	NC_042494.1	91877006	+	6.77727e-07	0.00737663	34.3201
uncharacterized LOC100160992	NC_042496.1	11152272	+	7.79926e-06	0.0270934	34.3137
N/A	NW_021770588.1	6037	-	9.66258e-07	0.00899021	34.3101
carnitine O-palmitoyltransferase 2, mitochondrial-like	NC_042493.1	32559130	-	2.14105e-05	0.0457	34.3013
integrin alpha-PS1-like	NC_042493.1	61170187	+	1.94418e-05	0.0436122	34.2979
# putative glutathione-specific gamma-glutamylcyclotransferase 2 & N-alpha-acetyltransferase 80	NC_042494.1	36119258	+	2.4232e-05	0.0484235	34.2919
histone deacetylase 6-like	NC_042493.1	35178503	+	8.8058e-06	0.0288508	34.267
N/A	NC_042495.1	11578561	+	1.79096e-05	0.0416767	34.2424
N-acetyltransferase-like	NC_042496.1	8367544	-	2.14675e-05	0.045754	34.2211
N/A	NC_042495.1	102307378	+	2.44108e-05	0.0485302	34.2199
probable RNA-binding protein 19-like	NC_042495.1	34788754	+	4.36784e-06	0.0196672	34.2105
protein SMG9-like	NC_042494.1	133507062	-	2.56222e-06	0.0150693	34.2094
uncharacterized LOC100169079	NC_042493.1	23012055	-	1.27524e-05	0.0351884	34.2062
protein wos2-like	NC_042496.1	24329641	-	1.27524e-05	0.0351884	34.2062
pyridoxal kinase-like	NC_042494.1	122945336	+	1.55497e-05	0.0388169	34.1961
syntaxin 1A	NC_042495.1	93414378	-	2.7052e-06	0.0155409	34.1846
uncharacterized LOC100162870	NC_042493.1	79343389	+	3.27746e-06	0.0170045	34.1497
meiotically up-regulated gene 71 protein-like	NC_042494.1	122901627	+	1.61299e-05	0.0395315	34.1312
GTPase-activating protein and VPS9 domain-containing protein 1-like	NC_042496.1	14295669	+	2.34932e-05	0.0477254	34.1209
RING finger and transmembrane domain-containing protein 2-like	NC_042494.1	51727981	-	2.83555e-08	0.00104354	34.1147
N/A	NC_042493.1	23964483	+	9.96379e-06	0.0309403	34.1111
uncharacterized LOC100573493	NC_042495.1	87380908	-	1.98035e-05	0.0441174	34.102
uncharacterized LOC100162477	NC_042494.1	21069617	-	1.78034e-07	0.00316068	34.0773
stromal interaction molecule homolog	NC_042494.1	69116455	-	2.09821e-05	0.0453527	34.058
methionyl-tRNA formyltransferase, mitochondrial-like	NC_042494.1	161272077	+	9.72366e-06	0.0305416	34.058
uncharacterized LOC100162351	NC_042494.1	116515042	-	1.49142e-05	0.0379311	34.0278
# prominin-like protein & glycerol kinase-like	NC_042494.1	76972178	-	4.89115e-06	0.0208557	34.0112
protein strawberry notch-like	NC_042496.1	8581509	+	7.77891e-06	0.0270733	34.0057
uncharacterized LOC100168197	NC_042494.1	118126241	+	1.40964e-05	0.0370406	33.9921
N/A	NC_042493.1	74843573	-	4.23817e-06	0.0194366	33.9885
Atg5	NC_042495.1	50866770	-	1.74798e-05	0.0412532	33.9744
N/A	NW_021771412.1	40823	+	4.82526e-06	0.0207113	33.9635
N/A	NC_042494.1	170128418	-	1.4256e-05	0.0371857	33.9627
e3 ubiquitin-protein ligase MARCH6-like	NC_042495.1	39050493	+	1.44219e-05	0.0374215	33.9596
protein piwi-like	NC_042493.1	57322406	+	2.48645e-06	0.0148708	33.9461
uncharacterized LOC100167534	NC_042496.1	7266718	+	2.25523e-05	0.0468964	33.9344
uncharacterized LOC100571574	NC_042494.1	6490759	-	2.48157e-05	0.0488819	33.9309
sorting nexin-27-like	NC_042494.1	129815793	+	3.31642e-06	0.0170855	33.9286
uncharacterized LOC100572451	NC_042494.1	164648095	-	1.77118e-05	0.041497	33.9286
epimerase family protein SDR39U1-like	NC_042496.1	5226746	-	5.68072e-06	0.0227479	33.9259
protein RFT1 homolog	NC_042494.1	55937078	+	7.92496e-07	0.00798297	33.9187
uncharacterized LOC100161169	NC_042496.1	36993880	-	7.30632e-07	0.00769011	33.912
abnormal spindle-like microcephaly-associated protein homolog	NC_042494.1	23646653	-	7.71162e-06	0.0269527	33.9016
LOC100168983	NC_042494.1	155631034	+	2.55274e-06	0.0150493	33.8961
N/A	NC_042495.1	43546652	+	5.68434e-06	0.0227479	33.8897
# 6-phosphogluconate dehydrogenase, decarboxylating & protein Abitram	NC_042495.1	16400175	-	1.45052e-05	0.0374583	33.8889
uncharacterized LOC100162602	NC_042494.1	70024937	+	1.49645e-06	0.0113242	33.8796
N/A	NC_042495.1	86568648	+	3.09848e-06	0.0165189	33.871
SAP domain-containing ribonucleoprotein-like	NC_042495.1	63407197	+	3.21237e-06	0.0168294	33.8699
PTB domain-containing engulfment adapter protein 1-like	NC_042495.1	16083171	-	5.59455e-06	0.022542	33.8542
N/A	NW_021770772.1	2879	+	1.05986e-08	0.000595876	33.8462
protein piwi-like	NC_042493.1	57323654	+	1.46915e-06	0.0112944	33.8304
laminin subunit alpha-like	NC_042494.1	114991686	+	3.69051e-06	0.0180972	33.8182
N/A	NC_042493.1	55208499	-	1.56289e-05	0.0388997	33.7893
cyclin-dependent kinase 12-like	NC_042493.1	60860791	-	1.2789e-05	0.0351884	33.7728
cytoskeleton-associated protein 5-like	NC_042495.1	115759952	+	2.33572e-06	0.0143859	33.7578
Hermansky-Pudlak syndrome 1 protein homolog	NC_042494.1	60743488	+	3.04673e-06	0.0164007	33.7562
Rtnl1	NC_042495.1	50800415	-	2.60192e-05	0.0497685	33.75
dynactin subunit 1-like	NC_042495.1	106251003	-	1.36074e-06	0.0108514	33.7489
protein kish-A-like	NC_042495.1	53974163	+	8.87143e-06	0.0289664	33.7273
# ring canal kelch homolog & kelch-like protein 3	NC_042494.1	168916600	+	2.44541e-06	0.014677	33.7076
frizzled-1-like	NC_042493.1	17853264	+	2.56512e-05	0.0495682	33.6672
possible pseudogene or miscRNA, No KEGG entry	NC_042495.1	102388814	-	9.72198e-06	0.0305416	33.6479
bleomycin hydrolase-like	NC_042494.1	131698335	+	5.68808e-06	0.0227479	33.644
N/A	NC_042494.1	152992207	+	1.11664e-05	0.0327391	33.6364
# dmX-like protein 2 & SEC14 cytosolic factor-like	NC_042495.1	116082844	-	1.11895e-06	0.0096165	33.6296
transformation/transcription domain-associated protein-like	NC_042494.1	112513634	-	1.46734e-05	0.0376017	33.5414
CCR4-NOT transcription complex subunit 1-like	NC_042494.1	157956586	+	2.70459e-06	0.0155409	33.5283
uncharacterized protein KIAA0564 homolog	NC_042494.1	80398736	-	7.00928e-06	0.0254867	33.5197
alanyl-tRNA synthetase, cytoplasmic-like	NC_042495.1	106832791	-	1.50492e-05	0.0380919	33.4928
uncharacterized LOC100570440	NC_042493.1	72462371	+	2.41907e-05	0.0483988	33.4863
uncharacterized LOC100575265	NC_042496.1	37011428	-	3.28314e-06	0.017007	33.4656
e3 ubiquitin-protein ligase NEDD4-like	NC_042495.1	51409733	+	2.04365e-05	0.0447762	33.4465
tyrosine-protein kinase CSK-like	NC_042494.1	130289760	-	1.778e-05	0.0415458	33.4409
chromodomain-helicase-DNA-binding protein Mi-2 homolog	NC_042494.1	55973838	-	5.7085e-07	0.00659132	33.4305
integrin-linked protein kinase-like	NC_042494.1	87441285	-	8.66589e-06	0.0286704	33.4177
LOC103309064	NC_042494.1	75588795	-	2.75741e-06	0.0156682	33.3791
WD repeat and FYVE domain-containing protein 3-like	NC_042494.1	133704482	+	2.10565e-05	0.0453729	33.3641
inositol 1,4,5-trisphosphate receptor-like	NC_042493.1	15360136	-	3.40996e-06	0.0173398	33.3431
N/A	NC_042493.1	74214051	+	6.82244e-07	0.00740411	33.3333
28S ribosomal protein S18a, mitochondrial	NC_042493.1	91553384	+	5.74227e-08	0.00155796	33.3333
LOC100163414	NC_042494.1	75870705	-	2.55157e-06	0.0150493	33.3333
ubiquitin carboxyl-terminal hydrolase 47-like	NC_042494.1	110821899	-	1.56083e-05	0.0388848	33.3333
# protein OSCP1 & paired amphipathic helix protein Sin3b	NC_042495.1	7920103	+	2.26503e-05	0.0469687	33.3333
tetratricopeptide repeat protein 15-like	NC_042495.1	38393605	-	1.21803e-05	0.0344777	33.3333
Pafah1b2	NC_042495.1	51540578	-	6.71631e-08	0.00168228	33.3333
N/A	NC_042495.1	97995179	-	4.32345e-06	0.0195857	33.3333
prefoldin subunit 1-like	NC_042495.1	116533888	-	9.94014e-07	0.0090447	33.3333
RNA polymerase I-specific transcription initiation factor RRN3-like	NC_042494.1	85068308	+	9.6044e-06	0.0303182	33.2979
uncharacterized LOC100569280	NC_042495.1	489700	+	2.50556e-05	0.0491031	33.2914
RING finger protein 37-like	NC_042496.1	9439861	+	2.01597e-05	0.0445242	33.2877
telomerase-binding protein EST1A-like	NC_042494.1	71611919	+	2.12518e-05	0.0455949	33.283
alkyldihydroxyacetonephosphate synthase-like	NC_042494.1	160605654	-	7.97606e-06	0.027349	33.2734
N/A	NC_042493.1	90641009	+	3.83056e-06	0.018333	33.2486
AP-2 complex subunit mu-1-like	NC_042493.1	82593501	+	1.26503e-06	0.0103117	33.2444
muskelin-like	NC_042494.1	25454952	+	4.67067e-06	0.0203553	33.2392
endoplasmic reticulum mannosyl-oligosaccharide 1,2-alpha-mannosidase-like	NC_042494.1	127632687	+	8.22847e-07	0.00819982	33.2381
uncharacterized LOC100165690	NC_042495.1	23037282	+	1.21647e-05	0.0344506	33.2203
N/A	NC_042496.1	20646647	-	1.07738e-05	0.0322033	33.2202
N/A	NC_042493.1	22998524	-	2.08912e-05	0.0452655	33.2176
UPF0139 membrane protein pMsmaA27-like	NC_042495.1	67298226	+	9.52366e-06	0.030236	33.2121
per	NC_042495.1	64049364	-	4.68202e-06	0.0203665	33.1454
rapamycin-insensitive companion of mTOR-like	NC_042494.1	85541567	-	4.27188e-06	0.019504	33.1384
uncharacterized LOC100167277	NC_042494.1	80321897	-	9.7861e-06	0.0306574	33.1371
uncharacterized LOC100162313	NC_042495.1	5526067	+	1.90569e-06	0.0129497	33.1269
ankyrin repeat and IBR domain-containing protein 1-like	NC_042494.1	56682121	-	5.9337e-06	0.0232755	33.1034
hexokinase type 2-like	NC_042494.1	15265283	-	2.08571e-05	0.045241	33.0917
N/A	NC_042496.1	41959953	+	3.3798e-06	0.0172565	33.0902
hepatocyte growth factor-regulated tyrosine kinase substrate-like	NC_042494.1	123555639	-	2.3404e-06	0.0143883	33.0877
EF-hand calcium-binding domain-containing protein 1-like	NC_042495.1	89795447	+	2.57453e-05	0.0495682	33.0833
N/A	NC_042495.1	106124271	-	7.90294e-07	0.00797159	33.0819
LOC115034123	NC_042495.1	25480910	+	1.16819e-05	0.0336342	33.0698
sorting nexin-9-like	NC_042493.1	16017098	-	1.26705e-06	0.0103121	33.0477
uncharacterized LOC100161444	NC_042495.1	71072196	-	2.56833e-05	0.0495682	33.0303
EF-hand calcium-binding domain-containing protein 1-like	NC_042495.1	89795467	-	3.55223e-06	0.0176874	33.0044
uncharacterized LOC100166720	NC_042493.1	89058324	-	2.10611e-05	0.0453729	32.987
fatty acid 2-hydroxylase-like	NC_042494.1	98338218	+	1.19259e-06	0.00998396	32.9697
phosphatidylinositol-4-phosphate 3-kinase C2 domain-containing subunit alpha-like	NC_042496.1	33214579	-	1.40004e-05	0.0368956	32.956
nef-associated protein 1-like	NC_042494.1	87952081	+	4.07698e-06	0.0189664	32.9423
nitrogen permease regulator 2-like protein-like	NC_042496.1	21483949	+	1.12988e-05	0.0329516	32.9353
N/A	NC_042495.1	32802533	+	2.58312e-05	0.0495682	32.9342
N/A	NC_042493.1	48973305	-	9.06291e-06	0.0293171	32.9296
uncharacterized LOC100571574	NC_042494.1	6490758	+	8.56082e-06	0.0285131	32.9221
# uncharacterized LOC100575747 & uncharacterized LOC100162227	NC_042494.1	159136214	+	7.91984e-06	0.0272954	32.9205
s-phase kinase-associated protein 2-like	NC_042495.1	71809112	-	2.62059e-05	0.0498819	32.9056
a-kinase anchor protein 17A-like	NC_042494.1	92463648	-	7.85653e-06	0.0272065	32.8837
N/A	NC_042495.1	87566074	-	2.22807e-05	0.0466577	32.8817
protein piwi-like	NC_042493.1	57323621	+	1.73795e-07	0.00313883	32.8782
transmembrane protein 209-like	NC_042494.1	47806446	+	1.68839e-05	0.0404344	32.8723
uncharacterized LOC100571046	NW_021771373.1	753	-	7.47469e-07	0.00777161	32.8213
uncharacterized LOC100162883	NC_042495.1	85947069	+	1.12252e-05	0.032802	32.8004
calcium and integrin-binding protein 1-like	NC_042495.1	75645374	+	1.48194e-08	0.000707778	32.7995
transcription elongation factor SPT5-like	NC_042494.1	58694122	+	6.75386e-06	0.0248926	32.7975
alanyl-tRNA synthetase, cytoplasmic-like	NC_042495.1	106832772	-	1.19995e-06	0.0100117	32.7895
fructose-bisphosphate aldolase-like	NC_042494.1	4693809	+	2.0499e-06	0.0133768	32.7678
protogenin B-like	NC_042494.1	161511405	+	1.33058e-05	0.035887	32.7648
uncharacterized LOC100162883	NC_042495.1	85939179	+	1.46667e-06	0.0112944	32.7473
LOC100160819	NC_042495.1	75585087	-	4.1969e-06	0.0193188	32.7331
uncharacterized LOC100570013	NC_042496.1	2296162	-	2.86248e-07	0.00424745	32.721
condensin-2 complex subunit D3-like	NC_042495.1	75159952	+	1.0191e-05	0.0313836	32.7149
uncharacterized LOC100569905	NC_042495.1	99015971	-	1.37109e-05	0.0364285	32.6931
putative nuclease HARBI1-like	NC_042494.1	53711092	-	2.0119e-05	0.0445134	32.6253
# carboxypeptidase N subunit 2 & WD repeat-containing protein 35	NC_042494.1	148666622	-	1.05511e-05	0.031872	32.6187
Atpcl	NC_042495.1	80042198	+	1.10539e-06	0.00958421	32.6087
zinc finger MYND domain-containing protein 11-like	NC_042495.1	97279728	+	4.05699e-08	0.00127462	32.6087
ankyrin repeat and FYVE domain-containing protein 1-like	NC_042494.1	82964144	-	2.16697e-05	0.0459609	32.5926
Cathd	NC_042496.1	3202044	-	1.87391e-07	0.00323779	32.5915
uncharacterized LOC100162870	NC_042493.1	79346179	+	2.3655e-07	0.00376479	32.5908
RNA-binding protein lark-like	NC_042495.1	59368590	+	6.25653e-06	0.0238787	32.5908
N/A	NC_042494.1	52835957	+	1.81497e-05	0.0419115	32.5882
60 kDa heat shock protein, mitochondrial-like	NC_042495.1	51865129	+	6.43106e-08	0.00164291	32.5865
N/A	NC_042495.1	68755085	+	6.18692e-06	0.0237325	32.5758
f-box only protein 11-like	NC_042494.1	61481812	-	1.98803e-05	0.0442354	32.5721
uncharacterized LOC100575429	NC_042495.1	89564772	-	2.33452e-06	0.0143859	32.568
RGM domain family member B-like	NC_042494.1	147845904	+	2.13836e-05	0.045671	32.5678
uncharacterized LOC100568465	NC_042494.1	12409599	-	9.83933e-06	0.0307512	32.5581
exportin-6-like	NC_042495.1	77192993	+	7.31355e-07	0.00769011	32.5581
uncharacterized LOC100166817	NC_042496.1	34808400	+	8.24561e-07	0.00820589	32.5558
rho GTPase-activating protein 19-like	NC_042494.1	118086520	+	1.43053e-05	0.0372723	32.5255
myotubularin-related protein 10-B-like	NC_042494.1	85768508	+	1.66977e-07	0.00306496	32.5
uncharacterized LOC100162025	NC_042494.1	138705171	+	1.32023e-05	0.0357544	32.4816
zinc finger protein 181-like	NC_042495.1	11363012	+	1.27546e-05	0.0351884	32.4727
uncharacterized LOC100573227	NC_042494.1	158733785	+	6.66375e-06	0.0247438	32.4667
cleft lip and palate transmembrane protein 1-like protein-like	NC_042494.1	124047370	+	2.6119e-05	0.0498252	32.4579
peroxisomal membrane protein PMP22-like	NC_042494.1	160361099	+	2.57775e-07	0.003984	32.4494
protein piwi-like	NC_042493.1	57319738	-	9.38804e-07	0.0088336	32.4474
# meiotic nuclear division protein 1 homolog & optic atrophy 3 protein homolog	NC_042494.1	45246471	+	1.16034e-06	0.00979113	32.4455
protocadherin-like wing polarity protein stan-like	NC_042495.1	63838465	-	8.05391e-06	0.0275044	32.4356
phosphatidate cytidylyltransferase, photoreceptor-specific-like	NC_042494.1	122859902	+	1.62973e-05	0.0397619	32.4212
mitogen-activated protein kinase kinase kinase 13-A-like	NC_042494.1	160331817	+	4.33464e-06	0.0195857	32.4008
proteasomal ubiquitin receptor ADRM1 homolog	NC_042496.1	34894375	+	1.42824e-06	0.0111817	32.3727
# tyrosine-protein phosphatase non-receptor type 11 & dnaJ homolog subfamily C member 11	NC_042494.1	129410404	+	9.12911e-06	0.0294302	32.3587
PHD finger protein 14-like	NC_042494.1	58355378	-	1.77243e-05	0.0415132	32.3529
ras GTPase-activating protein 1-like	NC_042496.1	5421103	+	4.37049e-06	0.0196673	32.3229
uncharacterized LOC100573676	NC_042493.1	86006201	-	8.69061e-06	0.0287058	32.2997
Fbxo5	NC_042494.1	46781463	-	1.27822e-05	0.0351884	32.2979
apoptotic protease-activating factor 1-like	NC_042495.1	67724812	-	1.01165e-05	0.0312515	32.269
uncharacterized LOC100166845	NC_042494.1	140187694	-	2.78303e-06	0.0157192	32.2568
calcium and integrin-binding protein 1-like	NC_042495.1	75644840	-	9.47343e-06	0.0301351	32.2473
x-ray repair cross-complementing protein 5-like	NC_042496.1	21124067	+	3.29902e-06	0.0170431	32.2244
probable serine incorporator-like	NC_042494.1	18047833	-	6.63481e-06	0.0246863	32.2117
N/A	NC_042495.1	93449942	+	1.26742e-05	0.0351437	32.2115
PCI domain-containing protein 2-like	NC_042495.1	95114613	-	1.50882e-05	0.0381647	32.2055
bleomycin hydrolase-like	NC_042494.1	131698002	+	3.78698e-06	0.0182539	32.2034
patatin-like phospholipase domain-containing protein 2-like	NC_042496.1	34834793	+	1.38856e-05	0.0367351	32.1964
CCR4-NOT transcription complex subunit 6-like	NC_042496.1	41778745	+	1.87627e-06	0.0128585	32.144
uncharacterized LOC100161323	NC_042495.1	105797984	+	5.3854e-07	0.0063852	32.1429
DET1- and DDB1-associated protein 1-like	NC_042495.1	28207474	+	5.86083e-08	0.0015697	32.1383
LOC103310430	NC_042495.1	1792839	-	7.91178e-06	0.0272803	32.1212
# carboxypeptidase N subunit 2 & Rps3a	NC_042494.1	148640121	+	2.18696e-06	0.0138598	32.094
centromere/kinetochore protein zw10 homolog	NC_042495.1	52061300	-	1.68096e-05	0.0403625	32.0455
uncharacterized LOC100164056	NC_042494.1	119437423	+	1.59141e-08	0.000731912	32
arrestin domain-containing protein 2-like	NC_042494.1	157888209	+	2.29849e-06	0.0142274	32
membrane-bound transcription factor site-1 protease-like	NC_042494.1	114001260	-	8.76816e-07	0.00850949	31.9635
uncharacterized LOC100572761	NC_042493.1	16647126	-	8.29929e-06	0.0280442	31.9435
esterase D/formylglutathione hydrolase-like	NC_042494.1	142145143	-	1.29776e-05	0.0353909	31.9416
UPF0493 protein AAEL009648-like	NC_042494.1	149480304	+	6.05423e-06	0.0234535	31.9355
menin-like	NC_042494.1	69079704	+	1.64244e-05	0.0399147	31.9325
uncharacterized LOC100164694	NC_042495.1	52746455	+	1.24536e-05	0.0348418	31.931
N/A	NW_021771483.1	4156	+	1.67959e-05	0.0403625	31.9192
nuclear hormone receptor FTZ-F1 beta-like	NC_042495.1	111696235	-	5.60568e-06	0.0225502	31.9043
6-phosphofructokinase-like	NC_042494.1	52820005	+	1.66064e-05	0.0401211	31.8686
uncharacterized LOC100165635	NC_042494.1	106102798	+	5.4609e-07	0.00642349	31.8681
LOC100160294	NC_042494.1	161309390	+	1.96997e-05	0.0439616	31.8491
probable ATP-dependent RNA helicase DDX23-like	NC_042495.1	84449170	+	1.96997e-05	0.0439616	31.8491
ras-related protein Rab-1A-like	NC_042493.1	80460333	-	2.37785e-05	0.0479832	31.8235
protein FAM102A-like	NC_042494.1	51987795	+	2.64181e-06	0.0153913	31.8182
uncharacterized LOC100160657	NC_042494.1	114071109	-	5.51071e-06	0.0224244	31.8182
uncharacterized LOC100573579	NC_042495.1	24069572	-	3.14813e-06	0.0166619	31.8182
N/A	NC_042495.1	67095645	+	1.45689e-06	0.0112584	31.8182
Ubfd1	NC_042494.1	70306695	-	2.02447e-05	0.0445365	31.8168
uncharacterized LOC100161505	NC_042496.1	8589813	+	1.26678e-05	0.0351392	31.8129
ral GTPase-activating protein subunit alpha-1-like	NC_042493.1	56416498	-	7.95839e-06	0.027327	31.7853
nicastrin-like	NC_042495.1	78023483	-	6.71645e-06	0.0248392	31.7587
activating signal cointegrator 1-like	NC_042494.1	149376759	+	5.80875e-06	0.0229816	31.75
LOC103309871	NC_042495.1	107049046	-	2.4916e-05	0.0489369	31.7453
neurochondrin homolog	NC_042493.1	91240325	+	6.62614e-06	0.0246741	31.7367
uncharacterized protein C6orf168-like	NC_042496.1	17207141	+	2.1172e-05	0.0454612	31.7187
uncharacterized LOC100572101	NC_042494.1	73873478	+	4.17304e-06	0.0192686	31.7143
beclin-1-like protein-like	NC_042494.1	1250457	-	1.63687e-05	0.0398707	31.713
DNA fragmentation factor subunit beta-like	NC_042495.1	83448467	+	1.80108e-06	0.0125657	31.7073
uncharacterized LOC100573651	NC_042496.1	42050942	-	4.33393e-06	0.0195857	31.7016
UDP-N-acetylglucosamine--peptide N-acetylglucosaminyltransferase 110 kDa subunit-like	NC_042495.1	964738	+	1.61147e-05	0.0395238	31.6667
uncharacterized LOC100162883	NC_042495.1	85939126	+	2.09864e-05	0.0453527	31.664
N/A	NC_042493.1	37481585	+	2.4074e-06	0.0145635	31.6558
mitochondrial 2-oxoglutarate/malate carrier protein-like	NC_042495.1	48617015	+	6.50899e-06	0.024426	31.6292
protein argonaute-2-like	NC_042494.1	6862794	+	1.90593e-05	0.0431578	31.6017
rho GTPase-activating protein 1-like	NC_042494.1	141089942	+	1.79211e-06	0.0125448	31.5789
# uncharacterized LOC100575747 & uncharacterized LOC100162227	NC_042494.1	159135953	-	3.01324e-06	0.0163269	31.5789
N/A	NC_042496.1	23208424	+	5.42982e-06	0.0222154	31.5789
N/A	NC_042493.1	8967389	-	3.1987e-07	0.00457292	31.5476
protein piwi-like	NC_042493.1	57322341	-	1.8736e-05	0.0426728	31.5184
uncharacterized protein CG10915-like	NC_042493.1	65669944	-	2.38897e-05	0.04809	31.5088
piwi-like protein 2-like	NC_042495.1	25749923	-	3.68152e-06	0.0180769	31.4806
# voltage-dependent T-type calcium channel subunit alpha-1H & uncharacterized LOC100568729	NC_042494.1	127011770	-	1.28465e-05	0.0351884	31.4674
piwi-like protein 2-like	NC_042495.1	25749671	-	4.98779e-06	0.0211399	31.4667
NF-kappa-B inhibitor-interacting Ras-like protein-like	NC_042496.1	15302762	+	1.07408e-05	0.0321966	31.4578
# serine/threonine-protein kinase/endoribonuclease IRE2 & glucose dehydrogenase [FAD, quinone]	NC_042494.1	26604696	+	1.92054e-05	0.0433041	31.4465
N/A	NC_042495.1	42419025	+	4.41968e-06	0.0198406	31.4286
uncharacterized LOC100570654	NC_042493.1	111769846	-	2.29809e-05	0.0472892	31.4266
N/A	NC_042494.1	11122489	-	2.15033e-05	0.0457867	31.3942
uncharacterized LOC100167340	NC_042494.1	78238754	-	1.09442e-06	0.00953662	31.3877
vacuolar protein sorting-associated protein 11 homolog	NC_042495.1	88287775	+	1.87852e-05	0.0427456	31.3725
uncharacterized LOC100160940	NC_042496.1	2040519	+	2.46483e-05	0.0486941	31.3718
e3 ubiquitin-protein ligase UBR1-like	NC_042496.1	6317076	-	1.40227e-07	0.00277247	31.3697
possible pseudogene or miscRNA, No KEGG entry	NC_042494.1	45223659	+	9.59119e-06	0.0302961	31.2925
uncharacterized LOC100160802	NC_042495.1	8683774	-	2.45756e-05	0.0486389	31.2925
DNA-directed RNA polymerases I, II, and III subunit RPABC1-like	NC_042496.1	10145579	-	5.9836e-07	0.00681198	31.25
N/A	NC_042494.1	16683872	-	2.39385e-05	0.0481362	31.2088
Pafah1b2	NC_042495.1	51540588	-	1.23931e-05	0.0347663	31.1851
LOC103309705	NC_042495.1	44886893	-	7.40359e-07	0.00774805	31.1801
uncharacterized LOC100163657	NC_042495.1	52044446	+	1.27788e-05	0.0351884	31.1742
N/A	NW_021766083.1	381	+	2.5772e-05	0.0495682	31.1514
v-type proton ATPase 116 kDa subunit a isoform 1-like	NC_042494.1	116392871	-	1.31466e-05	0.0356687	31.1157
N/A	NC_042494.1	113871023	-	1.46733e-05	0.0376017	31.1111
uncharacterized LOC100165734	NC_042495.1	84889495	-	8.35606e-07	0.00824955	31.1111
N/A	NC_042496.1	21477773	+	2.45259e-05	0.0486202	31.1086
LOC107884691	NC_042495.1	21168944	-	1.48714e-06	0.0113213	31.1008
N/A	NW_021770772.1	2867	+	9.77517e-07	0.00900481	31.092
d-glucuronyl C5-epimerase-like	NC_042493.1	59804713	+	1.26138e-06	0.0102933	31.0794
dynactin subunit 1-like	NC_042495.1	106251025	-	3.79142e-06	0.0182548	31.077
axin-related protein-like	NC_042494.1	50633486	+	3.95069e-06	0.018671	31.059
ubiquitin carboxyl-terminal hydrolase 36-like	NC_042495.1	86551597	+	2.74527e-08	0.00102555	31.0345
focal adhesion kinase 1-like	NC_042495.1	45047864	+	1.35577e-05	0.0362181	31.0109
uncharacterized LOC100161589	NC_042495.1	71725731	-	2.49031e-05	0.0489369	31.0065
LOC107882836	NC_042493.1	29211266	-	9.23966e-08	0.00209414	30.9917
uncharacterized LOC100166578	NC_042495.1	44034317	-	2.42517e-05	0.0484383	30.9897
inositol 1,4,5-trisphosphate receptor-like	NC_042493.1	15344825	+	2.88074e-06	0.0159659	30.9708
UDP-N-acetylglucosamine--peptide N-acetylglucosaminyltransferase 110 kDa subunit-like	NC_042495.1	36580024	+	2.43898e-06	0.014677	30.9682
DNA topoisomerase 3-alpha-like	NC_042494.1	152472986	-	3.1434e-06	0.0166558	30.9524
LOC100160952	NC_042496.1	37291001	-	2.42406e-07	0.00381408	30.9524
structural maintenance of chromosomes protein 4-like	NC_042494.1	114106501	-	5.49269e-06	0.0223987	30.9207
e3 ubiquitin-protein ligase HERC2-like	NC_042495.1	45645600	+	1.10294e-05	0.0325747	30.872
transformation/transcription domain-associated protein-like	NC_042494.1	112509504	-	3.92219e-06	0.0185954	30.8373
cytoplasmic dynein 1 intermediate chain-like	NC_042494.1	142567915	+	5.97837e-06	0.0233001	30.834
uncharacterized LOC100571463	NC_042493.1	15923656	+	8.62411e-06	0.0286503	30.8165
piwi-like protein 2-like	NC_042495.1	25749683	-	2.86057e-06	0.0159054	30.7928
COMM domain-containing protein 4-like	NC_042494.1	163529489	-	1.79483e-05	0.0417485	30.7746
peroxiredoxin-6-like	NC_042494.1	12673832	+	1.54921e-07	0.00293051	30.7692
arginyl-tRNA synthetase, cytoplasmic-like	NC_042493.1	86011878	-	1.88995e-05	0.0429282	30.719
N/A	NC_042495.1	42643421	+	5.33486e-06	0.021972	30.7157
uncharacterized LOC100161323	NC_042495.1	105796121	-	1.04504e-05	0.0316848	30.6923
cold shock domain-containing protein E1-like	NC_042495.1	84910860	+	1.29048e-05	0.035296	30.6713
uncharacterized LOC100569037	NC_042496.1	19886200	+	1.11491e-05	0.0327211	30.6534
macoilin-like	NC_042494.1	43192645	+	1.34886e-05	0.0361611	30.6479
disintegrin and metalloproteinase domain-containing protein 12-like	NC_042496.1	9835257	+	7.34833e-06	0.0261251	30.6391
uncharacterized LOC100159476	NC_042493.1	66433132	+	5.6332e-06	0.0226242	30.6227
possible pseudogene or miscRNA, No KEGG entry	NC_042493.1	72386919	-	1.07573e-05	0.0322033	30.6165
high mobility group protein 20A-like	NC_042493.1	62357954	+	2.34264e-05	0.0476937	30.578
uncharacterized LOC100573095	NW_021770088.1	15680	-	1.69267e-06	0.0121813	30.577
uncharacterized LOC100166883	NC_042493.1	52840811	-	7.19905e-06	0.0258893	30.5731
tolloid-like protein 2-like	NC_042494.1	96722596	+	2.58991e-05	0.0496608	30.5651
endoribonuclease Dcr-1-like	NC_042495.1	75231563	-	9.88134e-07	0.00904042	30.5628
DNA mismatch repair protein Mlh1-like	NC_042495.1	83675898	+	1.42003e-05	0.0371188	30.5556
uncharacterized LOC100160441	NC_042494.1	17646519	+	2.00789e-05	0.0444678	30.5463
phosphatidylinositol-4,5-bisphosphate 3-kinase catalytic subunit delta isoform-like	NC_042494.1	147260820	+	2.13163e-05	0.0456496	30.5254
N/A	NC_042494.1	65057855	+	1.69949e-06	0.0121996	30.4348
prominin-1-A-like	NC_042494.1	76975080	+	2.98644e-06	0.0162171	30.4348
# protein OSCP1 & paired amphipathic helix protein Sin3b	NC_042495.1	7920263	+	4.77335e-06	0.0205711	30.4348
TEL2-interacting protein 1 homolog	NC_042495.1	98896436	-	2.25438e-06	0.0140831	30.4348
zinc finger protein 845-like	NC_042495.1	109266624	+	4.02915e-06	0.0188857	30.4348
possible pseudogene or miscRNA, No KEGG entry	NC_042494.1	64191396	+	1.79775e-05	0.0417697	30.4307
uncharacterized LOC100161505	NC_042496.1	8588207	-	2.36865e-05	0.0478763	30.3983
alkyldihydroxyacetonephosphate synthase-like	NC_042494.1	160603413	-	2.15362e-06	0.0137899	30.3871
LOC115034022	NC_042495.1	97570826	-	1.42515e-05	0.0371857	30.3608
uncharacterized LOC100166883	NC_042493.1	52840622	-	1.77085e-05	0.041497	30.305
Down syndrome cell adhesion molecule-like protein CG42256-like	NC_042494.1	58908059	-	2.14442e-05	0.0457436	30.2586
uncharacterized LOC100167252	NC_042493.1	82679453	+	7.22956e-06	0.0259335	30.2564
DNA mismatch repair protein Mlh1-like	NC_042495.1	83677886	-	3.53803e-07	0.0048617	30.2326
N/A	NC_042495.1	98877206	-	1.1111e-06	0.00959342	30.2326
N/A	NC_042494.1	145529714	-	1.85881e-05	0.0425183	30.2222
nuclear pore complex protein Nup107-like	NC_042494.1	90683042	-	1.10095e-05	0.0325556	30.2219
uncharacterized LOC100160238	NC_042495.1	85569297	+	3.62962e-07	0.00492384	30.2151
N/A	NW_021771057.1	3240	-	3.07266e-06	0.0164569	30.2009
methylthioribose-1-phosphate isomerase-like	NC_042494.1	87924037	+	9.13197e-07	0.00870969	30.1587
uncharacterized LOC100165704	NC_042495.1	75133998	-	1.6643e-05	0.0401373	30.1463
[truncated: 723 more rows]

## Sheet: DiffCpG_3v4_25p
Gene Name	chr	DMS	strand	pvalue	qvalue	meth.diff
uncharacterized LOC100570947	NC_042495.1	76281144	-	3.822e-12	2.06864e-05	65.4783
N/A	NC_042495.1	102284744	-	1.09075e-09	0.000340889	59.919
N/A	NW_021761552.1	37216	+	4.36826e-10	0.000197025	57.2637
ubiquitin carboxyl-terminal hydrolase 48-like	NC_042494.1	128024618	+	2.40936e-09	0.000501558	53.3654
uncharacterized LOC100572778	NC_042494.1	106724889	+	1.08754e-06	0.0139816	53.1971
# legumain & uncharacterized LOC100570989	NC_042493.1	4270357	+	1.83901e-08	0.00165892	53.0241
seryl-tRNA synthetase, cytoplasmic-like	NC_042494.1	40311104	-	1.30979e-07	0.00464864	52.412
N/A	NC_042494.1	149493582	-	5.78931e-10	0.000216098	52.3864
LOC100168769	NC_042495.1	97895813	-	3.55717e-09	0.000614383	51.4706
receptor expression-enhancing protein 4-like	NC_042493.1	13904333	+	2.55593e-10	0.000169891	51.2849
guanylate cyclase 32E-like	NC_042495.1	94338142	-	3.34814e-09	0.000604054	51.0935
solute carrier family 25 member 44-like	NC_042494.1	13893565	-	2.52574e-06	0.0214102	50.9158
LOC103307672	NC_042495.1	40076721	+	2.53256e-06	0.0214328	50.5981
LOC100168423	NC_042494.1	59467550	+	3.30243e-07	0.00756159	50.5348
serine/threonine-protein phosphatase 2A regulatory subunit B'' subunit gamma-like	NC_042493.1	83503110	+	2.21507e-08	0.00181651	50.4676
# UMP-CMP kinase & protein FAM135A	NC_042495.1	78209735	+	5.72882e-09	0.000861304	50.4386
uncharacterized LOC100167656	NC_042493.1	37035445	+	1.91463e-06	0.0188085	50.3876
N/A	NC_042494.1	39751884	-	1.21027e-07	0.00441114	50.3137
uncharacterized protein C18orf8-like	NC_042493.1	8179780	+	1.32231e-06	0.0155924	50.3106
N/A	NC_042495.1	12287067	-	9.93007e-09	0.00120777	50.3005
zinc finger and SCAN domain-containing protein 2-like	NC_042493.1	81814443	+	1.0925e-07	0.00413504	50.1587
FMRFamide receptor-like	NC_042495.1	1447122	+	1.76895e-06	0.0183183	50
transcription elongation factor SPT6-like	NC_042495.1	46616510	-	1.11404e-09	0.000340889	49.4802
N/A	NC_042496.1	14996015	-	3.30059e-07	0.00756159	49.3292
f-actin-capping protein subunit beta-like	NC_042495.1	84442441	+	1.5916e-08	0.00155215	49.244
protein PIEZO2-like	NC_042493.1	88395282	+	4.24258e-07	0.00870597	49.192
N/A	NC_042496.1	24446554	+	3.08028e-07	0.00728027	49.1726
N/A	NC_042494.1	73894234	+	2.05257e-07	0.00598889	49.0755
protein polybromo-1-like	NC_042494.1	90488253	+	9.12589e-06	0.0383007	48.9474
LOC107882177	NC_042494.1	62920230	-	3.40468e-07	0.00772993	48.5
putative ankyrin repeat protein R840-like	NC_042495.1	12317649	+	8.02054e-08	0.00343168	48.1957
upstream activation factor subunit spp27-like	NC_042495.1	47941838	-	2.52452e-06	0.0214102	47.8992
dedicator of cytokinesis protein 1-like	NC_042494.1	166769296	+	1.66151e-07	0.00544077	47.8448
LOC100159531	NC_042494.1	102900460	-	1.69677e-08	0.00159716	47.6815
ATP-dependent RNA helicase A-like	NC_042495.1	36842277	-	7.7251e-08	0.00338521	47.541
probable 28S ribosomal protein S25, mitochondrial-like	NC_042496.1	20246090	+	5.19495e-07	0.00934107	47.4815
uncharacterized LOC100168472	NC_042495.1	5085249	-	8.46283e-07	0.0122309	47.3684
N/A	NC_042495.1	49870233	-	2.32775e-06	0.0204743	47.3469
twinfilin-like	NC_042496.1	40875309	+	4.70612e-08	0.00257521	46.854
tetratricopeptide repeat protein 37-like	NC_042495.1	107164763	-	2.17605e-08	0.00181112	46.8096
LOC100168423	NC_042494.1	59467544	+	1.62842e-06	0.0176275	46.6552
epidermal growth factor receptor kinase substrate 8-like	NC_042493.1	47925786	-	7.81609e-08	0.00338521	46.5196
possible pseudogene or miscRNA, No KEGG entry	NC_042495.1	67607323	+	1.62097e-06	0.0175996	46.3309
N/A	NC_042495.1	12287074	-	6.67297e-08	0.00308693	46.2903
tetratricopeptide repeat protein 28-like	NC_042496.1	30286482	-	5.16958e-10	0.000216098	46.2742
# probable serine/threonine-protein kinase nek3 & uncharacterized LOC100169243	NC_042494.1	118607842	-	2.93355e-07	0.00712003	46.2583
protein dopey-1 homolog	NC_042494.1	53547312	-	4.04323e-06	0.0261924	46.2348
LysM and putative peptidoglycan-binding domain-containing protein-like	NC_042495.1	8949751	-	3.37001e-08	0.00234169	46.0899
succinyl-CoA ligase [GDP-forming] subunit beta, mitochondrial-like	NC_042493.1	78025980	+	3.66204e-07	0.00795921	45.9677
uncharacterized LOC100159027	NC_042494.1	61905615	-	8.06255e-07	0.0118421	45.8333
N/A	NC_042494.1	166043012	+	4.89819e-06	0.0288182	45.8333
possible pseudogene or miscRNA, No KEGG entry	NC_042493.1	72390397	+	1.37869e-07	0.00475771	45.8111
possible pseudogene or miscRNA, No KEGG entry	NW_021770374.1	1355956	+	2.98882e-07	0.00718857	45.7516
uncharacterized LOC100569295	NC_042493.1	1522883	-	3.34339e-06	0.0240318	45.7143
putative ATP-dependent RNA helicase Pl10-like	NC_042494.1	122397242	+	2.94586e-06	0.0227962	45.6746
# tripeptidyl-peptidase 2 & probable RNA-binding protein 46	NC_042494.1	110360660	-	6.62789e-06	0.033148	45.6512
UPF0327 protein C1orf151-like	NC_042495.1	42785677	-	5.43523e-09	0.00084051	45.5449
N/A	NC_042495.1	102792894	-	2.219e-07	0.00625531	45.4737
N/A	NC_042494.1	83006787	-	8.82373e-06	0.0376937	45.4545
neurobeachin-like	NC_042494.1	72894041	+	5.34204e-07	0.00943344	45.3405
uncharacterized LOC100568808	NC_042494.1	56325037	+	5.53641e-08	0.00280622	45.2588
N/A	NC_042493.1	54502927	-	3.96199e-07	0.00831576	45.149
uncharacterized LOC100569792	NC_042495.1	116546067	-	1.26087e-05	0.0440428	45.0203
# maspardin & peroxisomal membrane protein 11B	NC_042495.1	60565754	-	3.3967e-06	0.0241563	45
LOC103310523	NC_042493.1	13431680	+	2.36757e-06	0.0206184	44.9599
# ring canal kelch homolog & ring canal kelch homolog	NC_042494.1	168696719	+	9.92261e-07	0.0131955	44.9025
N/A	NC_042494.1	102799572	-	1.77451e-06	0.0183183	44.8735
N/A	NC_042495.1	54331239	+	1.26799e-06	0.0153176	44.8701
elongation factor 2-like	NC_042494.1	103119545	+	3.43345e-06	0.0242286	44.8016
integrin alpha-PS1-like	NC_042493.1	61183332	+	7.23075e-06	0.0346797	44.7863
N/A	NC_042496.1	24542733	+	4.27844e-06	0.0269109	44.7028
N/A	NC_042495.1	2938980	+	8.0771e-07	0.0118462	44.6759
cytoskeleton-associated protein 5-like	NC_042495.1	116117237	+	1.04901e-05	0.0407295	44.6558
N/A	NC_042494.1	118020812	-	2.97394e-08	0.00218997	44.6105
uncharacterized LOC100160657	NC_042494.1	114066975	-	2.65155e-06	0.0218471	44.5315
protein piwi-like	NC_042493.1	57809207	-	1.02767e-05	0.0404037	44.477
TBC1 domain family member 15-like	NC_042494.1	155647569	-	1.32184e-05	0.044982	44.3878
N/A	NC_042496.1	15547247	-	1.05222e-07	0.00405504	44.1441
uncharacterized LOC100568498	NC_042493.1	63141284	-	5.4544e-08	0.00280622	44.1431
60S ribosomal export protein NMD3-like	NC_042495.1	25499498	-	7.06792e-11	9.56368e-05	44.1327
tyrosine-protein phosphatase Lar-like	NC_042495.1	4876632	+	2.88854e-07	0.00707424	44.0559
72 kDa inositol polyphosphate 5-phosphatase-like	NC_042495.1	71969381	-	5.13443e-06	0.0295641	44.0551
probable protein phosphatase CG10417-like	NC_042493.1	122219940	-	4.0053e-07	0.00838626	43.9619
stromal interaction molecule homolog	NC_042494.1	69113017	-	1.71709e-06	0.0181872	43.8923
N/A	NC_042494.1	82961647	-	5.38406e-07	0.00949216	43.8889
disheveled-associated activator of morphogenesis 2-like	NC_042495.1	80734415	+	1.92856e-07	0.00586418	43.871
uncharacterized LOC100168409	NC_042493.1	89828921	-	5.75893e-10	0.000216098	43.8338
tricarboxylate transport protein, mitochondrial-like	NC_042496.1	39252684	+	5.4167e-06	0.0303495	43.814
rho guanine nucleotide exchange factor 11-like	NC_042493.1	76137155	-	4.97926e-06	0.0291194	43.7558
neuroblastoma-amplified sequence-like	NC_042494.1	23470641	-	1.82313e-06	0.018447	43.6232
N/A	NC_042495.1	74162241	+	1.23584e-08	0.00139256	43.5606
N/A	NC_042494.1	92611645	-	3.6941e-06	0.0251548	43.4298
glycerol-3-phosphate acyltransferase 1, mitochondrial-like	NC_042495.1	108414913	+	9.88586e-07	0.0131843	43.4007
ras-related protein Rab-5C-like	NC_042493.1	29514280	-	5.90061e-07	0.0100711	43.3794
uncharacterized LOC100573576	NC_042496.1	21138294	+	1.89234e-07	0.00580347	43.3794
UPF0636 protein C4orf41 homolog	NC_042495.1	11658862	+	1.49057e-05	0.0473174	43.3721
uncharacterized LOC100575247	NC_042494.1	72540185	-	1.27005e-06	0.0153176	43.3333
N/A	NC_042493.1	68097376	-	1.01076e-05	0.0400849	43.3172
kelch-like protein 18-like	NC_042494.1	18779133	+	1.21149e-05	0.0433959	43.2952
LOC115034010	NC_042495.1	3993190	+	4.87905e-06	0.0287508	43.0891
LOC103310035	NC_042495.1	17142913	+	2.9798e-06	0.0228498	43.0562
uncharacterized LOC100163925	NC_042494.1	122615569	-	2.87302e-06	0.0224712	42.8571
N/A	NC_042495.1	2862290	+	5.99661e-06	0.0318589	42.8571
uncharacterized LOC100165690	NC_042495.1	23038318	-	6.88233e-08	0.00313098	42.8571
bifunctional ATP-dependent dihydroxyacetone kinase/FAD-AMP lyase (cyclizing)-like	NC_042495.1	92264519	+	7.09181e-06	0.0343327	42.7843
serine/threonine-protein phosphatase 6 catalytic subunit (EC:3.1.3.16)	NC_042495.1	97191277	+	1.08281e-06	0.0139705	42.7182
N/A	NC_042495.1	53323143	-	4.13165e-06	0.0264643	42.6554
N/A	NC_042496.1	22027846	+	3.95909e-06	0.0258749	42.5978
N/A	NC_042495.1	102324616	+	3.383e-06	0.0241401	42.5837
N/A	NC_042496.1	4422763	+	5.41081e-07	0.00951937	42.5558
rab proteins geranylgeranyltransferase component A 1-like	NC_042494.1	28372154	-	6.26583e-06	0.0322809	42.5455
uncharacterized LOC100159378	NC_042494.1	28569308	-	6.39736e-06	0.0324768	42.5239
ATP-binding cassette sub-family F member 1-like	NC_042493.1	58864592	-	5.30956e-07	0.00942219	42.4951
ubiquitin-conjugating enzyme E2-24 kDa-like	NC_042496.1	14181321	-	5.98737e-06	0.0318589	42.4918
DNA repair protein RAD51 homolog 1-like	NC_042493.1	89155066	-	4.59345e-07	0.00891822	42.381
LOC100163919	NC_042493.1	27533280	-	1.01405e-05	0.040106	42.351
kinesin-like protein KIF21A-like	NC_042495.1	79934966	-	5.087e-06	0.0293843	42.3401
ATP-binding cassette sub-family F member 1-like	NC_042493.1	58865910	-	4.44355e-07	0.00879831	42.3314
uncharacterized LOC100164078	NC_042494.1	113987252	+	2.51371e-07	0.00653423	42.3135
uncharacterized protein KIAA2013 homolog	NC_042493.1	32213740	+	7.0909e-06	0.0343327	42.2794
uncharacterized LOC100569295	NC_042493.1	1522912	-	1.26469e-05	0.0440883	42.2764
protein tweety-like	NC_042495.1	60522777	+	1.14878e-07	0.00424416	42.2222
5-aminolevulinate synthase, erythroid-specific, mitochondrial-like	NC_042493.1	31040110	-	5.50479e-08	0.00280622	42.1945
uncharacterized LOC100161391	NC_042493.1	34166028	-	1.7066e-06	0.0181447	42.1875
ring canal kelch homolog	NC_042495.1	24813323	-	1.66408e-05	0.0499646	42.1395
uncharacterized LOC100159476	NC_042493.1	66450218	-	6.30237e-06	0.0322809	42.0958
uncharacterized LOC100160772	NC_042496.1	19079010	-	6.95219e-07	0.0110672	42.0113
chromodomain-helicase-DNA-binding protein Mi-2 homolog	NC_042494.1	55975361	-	4.78582e-06	0.0285275	41.9698
corepressor interacting with RBPJ 1-like	NC_042494.1	125880025	+	1.47277e-05	0.0470422	41.9027
nuclear pore complex protein Nup133-like	NC_042494.1	79468299	-	1.80503e-07	0.00571321	41.8784
N/A	NC_042495.1	53323163	-	3.88083e-06	0.0256895	41.8577
lipoma-preferred partner homolog	NC_042494.1	37064799	+	9.60712e-06	0.0391529	41.8495
N/A	NC_042494.1	51437828	-	4.30736e-06	0.0269674	41.8367
N/A	NC_042496.1	27595311	-	3.30408e-07	0.00756159	41.7749
DNA-dependent protein kinase catalytic subunit-like	NC_042494.1	73767111	-	1.80154e-08	0.00165892	41.7411
LOC103308920	NW_021770316.1	7328	+	5.46867e-07	0.00957892	41.6667
N/A	NC_042495.1	63412777	+	4.59836e-07	0.00891822	41.619
# sushi, von Willebrand factor type A, EGF and pentraxin domain-containing protein 1 & methyltransferase-like protein 17, mitochondrial	NC_042494.1	154842399	+	7.93903e-06	0.0362612	41.6122
uncharacterized LOC100573930	NC_042494.1	12033334	-	4.43803e-07	0.00879831	41.6054
uncharacterized LOC100161061	NC_042495.1	68619248	+	9.01999e-07	0.0125988	41.5381
transcription factor HNF-4 homolog	NC_042494.1	47729224	-	3.02375e-06	0.0229034	41.4989
chromosome-associated kinesin KIF4-like	NC_042494.1	118013794	+	7.21375e-07	0.0112314	41.4855
uncharacterized LOC100162352	NC_042493.1	21467509	-	5.35891e-06	0.0302567	41.4634
# endoribonuclease Dcr-1 & nuclear pore complex protein Nup205	NC_042495.1	75246267	-	7.86668e-07	0.0117295	41.4622
N/A	NC_042496.1	13236331	+	8.97976e-06	0.0379262	41.4511
# legumain & armadillo-like helical domain-containing protein 3	NC_042493.1	4044058	+	7.58543e-06	0.035513	41.4478
uncharacterized LOC100574165	NC_042493.1	11268733	+	4.98965e-06	0.0291329	41.3236
diphthamide biosynthesis protein 2-like	NC_042495.1	51199611	+	4.51173e-08	0.00257521	41.2988
N/A	NC_042495.1	74258908	-	4.2809e-07	0.00870597	41.1992
AP-2 complex subunit beta-like	NC_042494.1	56662047	-	1.95307e-06	0.019081	41.1365
uncharacterized LOC100161455	NC_042496.1	30322120	+	7.40744e-06	0.0352149	41.1343
disks large homolog 5-like	NC_042495.1	66602521	+	9.80315e-06	0.0395689	41.0492
rho-associated protein kinase 2-like	NC_042493.1	44408394	-	6.1633e-06	0.0320781	40.9544
ankyrin repeat domain-containing protein 13B-like	NC_042494.1	91924797	+	2.18348e-06	0.020006	40.9524
LOC100160819	NC_042495.1	75614132	-	7.76142e-06	0.0359142	40.952
exosome complex exonuclease RRP46-like	NC_042494.1	13901627	+	2.21688e-06	0.020048	40.9091
g2/mitotic-specific cyclin-B3-like	NC_042493.1	84598134	-	1.16404e-05	0.0426927	40.8974
uncharacterized LOC100574984	NC_042494.1	84434071	-	3.30531e-06	0.0239384	40.8602
uncharacterized LOC100573150	NC_042495.1	62446860	-	1.41815e-08	0.00149042	40.8382
WD repeat and FYVE domain-containing protein 3-like	NC_042494.1	133719464	+	1.20697e-05	0.0433182	40.8333
N/A	NC_042493.1	59906493	+	1.26506e-08	0.00139256	40.7407
signal-induced proliferation-associated 1-like protein 1-like	NC_042494.1	131854742	+	1.25764e-05	0.0440263	40.7283
N/A	NC_042496.1	18992159	-	8.90074e-06	0.0378154	40.7276
N/A	NC_042494.1	89196504	+	6.31306e-06	0.0322809	40.7052
LUC7-like (S. cerevisiae)	NC_042495.1	8207959	+	1.53084e-05	0.0480463	40.6582
uncharacterized LOC100166339	NC_042496.1	12287730	+	4.35721e-06	0.0271383	40.625
uncharacterized LOC100162838	NC_042496.1	33491961	-	1.30361e-05	0.0447272	40.6169
transcription elongation factor SPT6-like	NC_042495.1	46616493	-	6.93239e-07	0.0110519	40.6004
26S protease regulatory subunit 6B-like	NC_042494.1	107290114	-	4.35513e-07	0.00879549	40.5997
possible pseudogene or miscRNA, No KEGG entry	NC_042494.1	64195070	+	2.27472e-06	0.0202405	40.5703
# transient receptor potential protein & cleavage and polyadenylation specificity factor subunit 1	NC_042494.1	55171033	+	6.56356e-06	0.0329712	40.5556
N/A	NC_042496.1	18625165	-	8.74557e-06	0.0375674	40.5385
n-acetylgalactosaminyltransferase 7-like	NC_042494.1	35976250	+	1.12175e-05	0.0421332	40.5239
N/A	NC_042494.1	104789306	-	9.29516e-07	0.0127889	40.4375
60S ribosomal protein L3-like	NC_042494.1	82958739	-	1.21572e-07	0.00441613	40.4161
nuclear pore complex protein Nup85-like	NC_042494.1	119110289	+	8.36521e-08	0.00351497	40.3951
embryonic polarity protein dorsal-like	NC_042495.1	84415482	+	4.46219e-07	0.00879831	40.3628
cell division protein kinase 5 (EC:2.7.11.22)	NC_042494.1	59656918	-	1.58049e-05	0.0488777	40.3564
LOC107882173	NC_042494.1	5023171	-	3.70258e-06	0.0251759	40.3474
N/A	NC_042493.1	46535487	+	1.60856e-05	0.0491601	40.3383
basement membrane-specific heparan sulfate proteoglycan core protein-like	NC_042495.1	97443560	+	1.35081e-05	0.0453882	40.3333
LOC107884620	NC_042496.1	33770493	-	8.0621e-06	0.036439	40.3191
N/A	NC_042494.1	9471000	+	9.91537e-06	0.0398355	40.2632
d-glucuronyl C5-epimerase-like	NC_042493.1	59811899	-	9.08581e-06	0.0382398	40.1961
N/A	NC_042494.1	48599110	-	4.00893e-06	0.0260638	40.1442
possible pseudogene or miscRNA, No KEGG entry	NC_042496.1	38307764	-	5.59986e-06	0.0308488	40.0862
cytoskeleton-associated protein 5-like	NC_042495.1	116114105	+	5.53317e-06	0.0305903	40.0626
N/A	NC_042494.1	108806612	-	5.62147e-06	0.03087	40.0616
uncharacterized LOC100569295	NC_042493.1	1516220	+	1.72254e-06	0.0181961	40.0463
LOC107882823	NC_042493.1	88872015	+	4.59089e-06	0.0279661	40.035
possible pseudogene or miscRNA, No KEGG entry	NC_042493.1	70239944	-	2.58673e-07	0.00664626	40.0304
N/A	NC_042494.1	51437586	-	2.84781e-06	0.0224035	40
uncharacterized LOC100161403	NC_042496.1	34969316	+	2.50163e-08	0.00196231	40
# uncharacterized LOC100160247 & uncharacterized LOC107882879	NC_042494.1	130864807	+	1.50863e-05	0.0475976	39.9123
uncharacterized LOC100572041	NC_042494.1	16326629	-	1.5685e-05	0.0487196	39.8462
LOC100164947	NC_042493.1	42402881	-	1.00585e-05	0.0399862	39.7959
probable cytosolic Fe-S cluster assembly factor AAEL012261-like	NC_042495.1	103399741	+	2.02647e-06	0.0194469	39.7942
zinc finger SWIM domain-containing protein KIAA0913-like	NC_042494.1	95951427	-	8.72002e-06	0.0375172	39.7878
# nose resistant to fluoxetine protein 6 & cytochrome c oxidase assembly factor 3, mitochondrial	NC_042496.1	30402335	+	1.12909e-07	0.00419317	39.7393
TBC1 domain family member 12-like	NC_042495.1	94181842	-	2.82764e-06	0.0222812	39.7109
tubulin alpha chain-like	NC_042494.1	41302859	+	6.44013e-06	0.0325765	39.657
ATP-dependent RNA helicase Ddx1-like	NC_042495.1	76131937	+	1.28738e-05	0.0445659	39.6321
CCR4-NOT transcription complex subunit 1-like	NC_042494.1	157954013	-	1.16174e-08	0.00135223	39.6226
uncharacterized LOC100166146	NC_042494.1	98161402	-	3.92925e-08	0.00248735	39.5833
leucine-rich repeat and WD repeat-containing protein 1-like	NC_042494.1	27978600	+	7.47693e-06	0.0352966	39.578
protein ST7 homolog	NC_042493.1	4544963	-	2.98648e-06	0.0228498	39.5545
N/A	NC_042495.1	42798234	+	2.48878e-06	0.0212634	39.5536
N/A	NC_042494.1	113904941	-	7.26183e-06	0.0347825	39.5417
uncharacterized LOC100165557	NC_042496.1	808690	+	1.79116e-06	0.018388	39.5254
N/A	NC_042495.1	54321993	+	5.94766e-08	0.00291324	39.4737
uncharacterized LOC100569330	NC_042493.1	79782676	-	4.97761e-07	0.00916361	39.441
PTB domain-containing engulfment adapter protein 1-like	NC_042495.1	16085274	-	3.9491e-06	0.0258749	39.3742
probable RNA helicase armi-like	NC_042496.1	15802750	-	7.83262e-06	0.0360643	39.3617
nicotinate phosphoribosyltransferase-like	NC_042495.1	11161454	+	1.47192e-05	0.0470392	39.3342
ADP-ribosylation factor-like protein	NC_042495.1	58978658	-	5.30985e-06	0.0300935	39.2857
uncharacterized LOC100575182	NC_042495.1	3990709	-	3.59567e-08	0.00237914	39.2519
# protein gustavus & chromosome transmission fidelity protein 8 homolog & 3-hydroxy-3-methylglutaryl-coenzyme A reductase	NC_042495.1	81581711	-	1.00123e-07	0.00396334	39.2208
v-type proton ATPase 116 kDa subunit a isoform 1-like	NC_042494.1	116465807	+	1.16515e-05	0.0426927	39.2157
uncharacterized LOC100569146	NC_042495.1	51420735	-	6.47694e-06	0.0326711	39.16
cold shock domain-containing protein E1-like	NC_042495.1	84907623	-	1.3865e-06	0.0160865	39.1587
N/A	NW_021761552.1	37230	+	9.49963e-06	0.0390552	39.1026
NADH-cytochrome b5 reductase-like (EC:1.6.2.2)	NC_042494.1	160508129	-	4.99414e-06	0.0291434	39.0351
blood vessel epicardial substance-like	NC_042495.1	96978772	-	6.8143e-07	0.0109828	39.0351
N/A	NC_042493.1	40537219	+	2.20238e-06	0.0200475	39.0031
N/A	NC_042495.1	109095587	+	5.52655e-06	0.0305855	38.9969
LOC103308662	NC_042493.1	95489905	-	8.5088e-06	0.0371249	38.9881
eukaryotic translation initiation factor 1	NC_042493.1	3202622	+	4.16305e-06	0.0265199	38.984
phosphatidylinositol 3-kinase regulatory subunit beta-like	NC_042495.1	106119590	+	1.10258e-05	0.0417127	38.9796
LOC103310425	NC_042494.1	90244863	+	4.26974e-08	0.00248852	38.8889
N/A	NC_042495.1	85751418	-	1.79421e-06	0.0183921	38.8651
uncharacterized LOC100164637	NC_042494.1	90847907	+	1.26715e-05	0.0441338	38.834
protein TANC2-like	NC_042494.1	15590567	+	1.48332e-05	0.047212	38.8304
N/A	NC_042496.1	29420831	+	7.18338e-06	0.0345803	38.8167
protein ECT2-like	NC_042495.1	64087646	+	1.98883e-07	0.00588272	38.8121
uncharacterized LOC100167340	NC_042494.1	78232416	-	7.90719e-07	0.0117446	38.7755
uncharacterized LOC100161797	NC_042495.1	54718378	+	8.60354e-06	0.037292	38.7628
uncharacterized LOC100574165	NC_042493.1	11268719	+	6.62583e-06	0.033148	38.762
aryl hydrocarbon receptor nuclear translocator homolog	NC_042495.1	81794868	+	6.2911e-06	0.0322809	38.67
uncharacterized LOC100160291	NC_042495.1	63379723	-	1.67372e-07	0.00544077	38.6371
FAS-associated factor 1-like	NC_042494.1	114750462	+	4.80272e-07	0.00905729	38.6341
carboxypeptidase D-like	NC_042495.1	11381734	+	8.11514e-06	0.0365178	38.5795
transcription elongation factor SPT6-like	NC_042495.1	46616486	-	2.96072e-06	0.0228272	38.5417
ring canal kelch homolog	NC_042494.1	113458668	-	4.61807e-06	0.0280371	38.5343
f-box/WD repeat-containing protein 1A-like	NC_042494.1	14352933	-	7.25779e-06	0.0347785	38.5256
LOC100159531	NC_042494.1	102900450	-	5.17541e-06	0.0296576	38.4988
proton-coupled folate transporter-like	NC_042493.1	125604854	-	9.03413e-06	0.0380964	38.4725
aminopeptidase-like 1	NC_042496.1	15146536	-	5.64983e-07	0.00976276	38.4706
pancreatic triacylglycerol lipase-like	NC_042494.1	75059102	+	8.17392e-08	0.00346832	38.4615
N/A	NC_042495.1	104391860	+	2.74937e-06	0.0220432	38.3995
uncharacterized LOC100160462	NC_042494.1	161559232	-	1.43936e-05	0.0466076	38.3071
bleomycin hydrolase-like	NC_042494.1	131694940	+	2.35034e-06	0.0205607	38.2536
transforming growth factor beta regulator 1-like	NC_042493.1	71484358	-	6.11003e-06	0.0319828	38.2184
uncharacterized LOC100164427	NC_042496.1	28584415	+	7.34274e-07	0.0112744	38.1667
possible pseudogene or miscRNA, No KEGG entry	NC_042493.1	11451908	+	1.45746e-05	0.0467807	38.1402
N/A	NC_042496.1	18724374	+	1.14878e-06	0.0144935	38.1285
# nuclear protein localization protein 4 homolog & uncharacterized LOC100167987	NC_042494.1	147803913	+	3.68218e-07	0.00795921	38.1064
LOC115033646	NC_042494.1	10589261	-	6.07291e-09	0.000876514	38.0952
N/A	NC_042496.1	14257708	-	8.37757e-08	0.00351497	38.0902
beta-chimaerin-like	NC_042494.1	23432621	+	5.57776e-07	0.0096916	38.0891
uncharacterized LOC100575782	NC_042495.1	12975441	-	4.32426e-06	0.0270108	38.0769
pre-mRNA-splicing factor SYF2-like	NC_042495.1	23031909	-	2.1082e-06	0.0196903	38.0757
ubiquitin carboxyl-terminal hydrolase 3-like	NC_042495.1	74628787	+	8.01816e-06	0.0363466	38.0411
pre-mRNA-processing factor 39-like	NC_042495.1	110877448	-	1.29008e-05	0.0445879	38.0137
WD repeat-containing protein 74-like	NC_042493.1	35195479	+	1.16455e-05	0.0426927	38
N/A	NC_042495.1	79341854	-	7.39151e-06	0.0352149	37.9927
N/A	NC_042494.1	45021691	-	1.06503e-05	0.0410864	37.9375
dedicator of cytokinesis protein 1-like	NC_042494.1	166774130	+	3.56436e-06	0.0247755	37.9217
late secretory pathway protein AVL9 homolog	NC_042495.1	4684542	-	7.83111e-07	0.0117147	37.9022
N/A	NC_042493.1	104433304	+	3.29514e-06	0.0239384	37.7778
N/A	NC_042495.1	107065860	-	1.36185e-05	0.0455097	37.7551
e3 ubiquitin-protein ligase RING2-like	NC_042493.1	7726578	+	5.12516e-06	0.0295417	37.7384
valacyclovir hydrolase-like	NC_042494.1	152927966	+	1.39186e-05	0.0460333	37.6442
N/A	NW_021771430.1	3193	-	1.14978e-05	0.0425326	37.5711
leucine-rich repeat flightless-interacting protein 2-like	NC_042493.1	60882401	+	2.01235e-06	0.0193976	37.5706
uncharacterized LOC100574883	NC_042493.1	114557062	-	8.27887e-06	0.0368646	37.5387
UPF0505 protein C16orf62 homolog	NC_042495.1	85431050	-	1.03587e-05	0.0404181	37.5042
endoplasmic reticulum-Golgi intermediate compartment protein 2-like	NC_042493.1	25212563	+	2.0341e-06	0.0194514	37.5
LOC100163013	NC_042494.1	165423758	-	1.40119e-08	0.00148703	37.5
endoribonuclease dcr-1-like	NC_042495.1	65495021	-	1.78089e-07	0.00566305	37.5
n-alpha-acetyltransferase 35, NatC auxiliary subunit-like	NC_042494.1	148299644	-	8.15153e-06	0.0365835	37.4707
g2/mitotic-specific cyclin-B3-like	NC_042493.1	84598105	-	9.92493e-06	0.0398355	37.4576
LOC103310693	NC_042495.1	38515733	+	6.46441e-06	0.0326231	37.4447
cell division protein kinase 5 (EC:2.7.11.22)	NC_042494.1	59656920	-	1.43708e-05	0.0465757	37.4069
N/A	NC_042495.1	119465713	-	1.82305e-07	0.00575345	37.4063
CCR4-NOT transcription complex subunit 1-like	NC_042494.1	157954046	-	1.25206e-06	0.0151999	37.3077
N/A	NC_042495.1	74259609	+	1.88802e-06	0.0186851	37.2727
N/A	NC_042495.1	107648306	-	1.26088e-05	0.0440428	37.2503
N/A	NC_042496.1	34793608	-	9.46241e-07	0.0129004	37.2106
ras-related protein Rab-5C-like	NC_042493.1	29514289	-	8.76391e-08	0.0036348	37.2093
poly(rC)-binding protein 3-like	NC_042494.1	116325252	+	3.1595e-06	0.0234188	37.1836
uncharacterized LOC100573973	NC_042494.1	133463008	-	7.50936e-06	0.0353639	37.1663
# lebercilin-like & uncharacterized LOC100160248	NC_042494.1	22147252	-	6.55128e-07	0.0107343	37.1375
N/A	NC_042495.1	114911069	-	2.92633e-06	0.0227076	37.1051
phosphoinositide 3-kinase regulatory subunit 4-like	NC_042495.1	108081410	+	4.74928e-06	0.028376	37.0957
possible pseudogene or miscRNA, No KEGG entry	NC_042494.1	71727701	+	4.20926e-06	0.026709	37.0768
protein AATF-like	NC_042495.1	102899300	-	1.41175e-05	0.0462974	37.0389
N/A	NC_042495.1	47386060	+	9.07792e-06	0.0382215	37.0285
uncharacterized LOC100164446	NC_042495.1	87412237	-	3.36307e-06	0.0240691	37.0098
uncharacterized LOC100160456	NC_042496.1	14136229	+	1.21481e-05	0.0434572	36.9748
uncharacterized LOC100164208	NC_042494.1	145656254	-	1.44502e-05	0.0466674	36.9576
# uncharacterized LOC107884556 & uncharacterized LOC100166297	NC_042493.1	86360077	+	3.22763e-06	0.0236856	36.9565
actin-related protein 10-like	NC_042494.1	22742976	-	2.10167e-06	0.0196606	36.9565
zinc finger protein 845-like	NC_042495.1	109265993	+	1.25268e-06	0.0151999	36.9231
N/A	NW_021770623.1	13708	+	7.00271e-07	0.0110709	36.9044
LOC100162362	NC_042495.1	13113329	-	9.63632e-06	0.0391709	36.8599
uncharacterized protein LOC100166998	NC_042495.1	106742836	-	4.0748e-06	0.0263484	36.8562
inositol 1,4,5-trisphosphate receptor-like	NC_042493.1	15367989	-	9.11432e-06	0.0383007	36.8547
uncharacterized LOC100160089	NC_042493.1	66493358	+	4.09016e-06	0.0263757	36.8049
NFX1-type zinc finger-containing protein 1-like	NC_042493.1	56243880	-	4.91711e-06	0.028865	36.7692
zinc finger protein 250-like	NC_042494.1	106532240	-	1.14226e-05	0.0423922	36.7689
WD repeat and FYVE domain-containing protein 3-like	NC_042494.1	133722950	+	2.9217e-07	0.00712003	36.7063
sideroflexin-2-like	NC_042494.1	27367769	+	5.79107e-06	0.0312236	36.675
N/A	NC_042495.1	16517294	+	6.21923e-06	0.0322498	36.6667
nuclear pore complex protein Nup88-like	NC_042494.1	162596985	-	1.70424e-07	0.00549055	36.6271
possible pseudogene or miscRNA, No KEGG entry	NC_042493.1	122225649	-	6.02429e-06	0.0318862	36.625
uncharacterized LOC100569512	NC_042496.1	2221322	+	1.08511e-05	0.0413868	36.6192
N/A	NC_042493.1	105601320	-	3.56608e-06	0.0247755	36.6035
COP9 constitutive photomorphogenic homolog subunit 6	NC_042495.1	5500687	-	2.8116e-06	0.0222318	36.5794
protein kibra-like	NC_042494.1	168178071	+	2.12231e-06	0.0197639	36.5617
protogenin B-like	NC_042494.1	161510103	+	1.22919e-05	0.0437109	36.5584
N/A	NC_042495.1	115651537	-	4.87263e-07	0.00913359	36.5119
uncharacterized LOC100165557	NC_042496.1	808927	-	8.24645e-07	0.0119594	36.4341
pre-mRNA-splicing factor ATP-dependent RNA helicase PRP16-like	NC_042495.1	14101878	+	1.4914e-05	0.0473298	36.4011
splicing factor 3B subunit 1-like	NC_042494.1	99536662	+	2.42734e-06	0.0209368	36.3993
ATP-binding cassette sub-family F member 1-like	NC_042493.1	58875625	+	1.69271e-07	0.00548469	36.3961
nuclear pore complex protein Nup88-like	NC_042494.1	162598952	-	3.91141e-06	0.0257403	36.3925
COMM domain containing 2	NC_042494.1	123096841	-	6.21769e-08	0.00298426	36.3636
ATP-dependent DNA helicase Q5-like	NC_042495.1	114404164	-	3.2219e-08	0.00231372	36.3636
# homeobox protein vnd & 1-phosphatidylinositol 4,5-bisphosphate phosphodiesterase	NC_042494.1	68388974	-	9.96309e-06	0.0399146	36.3261
N/A	NC_042493.1	1430052	-	8.20495e-06	0.0367015	36.3122
N/A	NC_042493.1	51345714	-	1.84134e-06	0.0185115	36.2998
calpain-D-like	NC_042496.1	35114704	+	7.98057e-07	0.011797	36.2319
N/A	NC_042495.1	50165231	+	6.00661e-12	2.16736e-05	36.2069
uncharacterized LOC100164446	NC_042495.1	87496433	-	6.13707e-07	0.0102939	36.1702
serpin B4-like	NC_042495.1	95336515	-	8.05079e-06	0.0364182	36.1673
aspartyl-tRNA synthetase, mitochondrial (EC:6.1.1.12)	NC_042493.1	2993761	-	3.81883e-06	0.0255175	36.1538
fat-like cadherin-related tumor suppressor homolog	NC_042494.1	77951564	+	4.29782e-06	0.0269545	36.145
coiled-coil and C2 domain-containing protein 2A-like	NC_042496.1	35478844	-	3.7884e-06	0.0254491	36.127
N/A	NC_042496.1	15473677	-	2.08522e-07	0.00603537	36.1171
zinc finger protein 25-like	NC_042495.1	67245729	-	5.79954e-06	0.0312236	36.0695
golgi-specific brefeldin A-resistance guanine nucleotide exchange factor 1-like	NC_042495.1	25552016	+	1.02434e-05	0.0403077	36.0165
LMBR1 domain-containing protein 2 homolog	NC_042496.1	21132607	-	2.35061e-07	0.00638112	36.0096
N/A	NC_042494.1	158734253	+	1.05849e-05	0.0409666	36.0009
uncharacterized LOC100163506	NC_042494.1	158325779	-	2.64448e-06	0.0218188	36
uncharacterized LOC100570502	NC_042494.1	138171745	+	1.27135e-05	0.0442514	35.9811
ras-related protein Rab-1A-like	NC_042493.1	80460299	+	1.57422e-05	0.0488049	35.9699
protein pellino-like	NC_042493.1	76826470	-	9.18355e-06	0.0383346	35.8553
signal recognition particle 14 kDa protein-like	NC_042493.1	57264348	+	1.12235e-05	0.0421359	35.8392
DNA polymerase epsilon catalytic subunit A-like	NC_042496.1	36644540	-	1.36458e-05	0.0455097	35.8374
tubulin beta-3 chain-like	NC_042495.1	6726227	-	2.19507e-06	0.0200475	35.8333
LOC115033263	NC_042493.1	30753608	+	4.70516e-06	0.0282249	35.779
N/A	NC_042493.1	120502635	+	8.83987e-06	0.0377002	35.75
limkain-b1-like	NC_042495.1	76148991	-	1.01274e-05	0.0400979	35.7367
uncharacterized LOC100161169	NC_042496.1	36987540	-	1.2221e-06	0.0150251	35.5932
uncharacterized LOC100165119	NC_042496.1	14995421	-	1.05264e-07	0.00405504	35.5867
NV7	NC_042494.1	70546164	-	8.39048e-06	0.0370104	35.57
transformation/transcription domain-associated protein-like	NC_042493.1	8188750	+	1.51292e-05	0.0476913	35.4497
vacuolar protein sorting-associated protein 37A-like	NC_042495.1	64095094	-	2.95234e-06	0.0227962	35.422
CTP synthase (EC:6.3.4.2)	NC_042495.1	12864500	-	3.92011e-06	0.0257649	35.4167
N/A	NC_042495.1	68544723	-	5.5467e-08	0.00280622	35.4167
LOC103310684	NC_042494.1	57618102	+	9.30029e-07	0.0127889	35.3849
cisplatin resistance-associated overexpressed protein	NC_042496.1	33375003	-	4.26853e-06	0.0268781	35.3846
PHD finger protein 14-like	NC_042494.1	58358594	-	1.44761e-05	0.0466674	35.3793
protein pellino-like	NC_042493.1	76816561	-	2.20033e-06	0.0200475	35.3462
ubiquitin-conjugating enzyme E2-25kD-like	NC_042494.1	112743266	-	5.23937e-07	0.00937448	35.2632
reticulon-4-interacting protein 1, mitochondrial-like	NC_042493.1	55380338	-	1.48146e-05	0.0471942	35.2487
alpha-actinin, sarcomeric-like	NC_042495.1	35019057	+	5.15248e-07	0.00934107	35.2345
LOC103309634	NC_042495.1	54197299	+	3.78332e-06	0.0254491	35.2129
N/A	NC_042496.1	13672416	-	4.77048e-07	0.00904376	35.2068
N/A	NC_042494.1	80304762	-	7.64365e-08	0.00338521	35.1259
cytosolic carboxypeptidase-like protein 5-like	NC_042494.1	101094031	-	2.16681e-06	0.0199605	35.0725
lysosomal-trafficking regulator-like	NC_042494.1	157986481	-	9.70412e-06	0.0393136	35.0629
# 4-coumarate--CoA ligase 3 & serine/threonine-protein phosphatase 4 regulatory subunit 2	NC_042494.1	160223964	+	1.45044e-06	0.0164845	35.0446
60S ribosomal protein L5-like	NC_042495.1	93113600	+	6.98785e-07	0.0110709	35
uncharacterized LOC100572991	NC_042493.1	41837463	+	8.69538e-06	0.0374532	34.9655
sorting nexin-6-like	NC_042493.1	58465321	+	1.05661e-05	0.0409625	34.9282
uncharacterized LOC100167151	NC_042496.1	14983769	-	9.90984e-07	0.0131947	34.8905
uncharacterized LOC100167340	NC_042494.1	78239261	-	1.14812e-05	0.0425326	34.8837
protein suppressor of white apricot-like	NC_042494.1	78009240	-	1.58931e-05	0.0489448	34.8718
probable ATP-dependent RNA helicase pitchoune-like	NC_042496.1	9347578	+	1.82553e-06	0.018447	34.8325
uncharacterized LOC100159378	NC_042494.1	28574610	-	7.48693e-07	0.011432	34.8106
tyrosine-protein phosphatase 99A-like	NC_042493.1	47952773	+	2.77462e-06	0.022127	34.8025
equilibrative nucleoside transporter 1-like	NC_042495.1	76452424	-	1.06647e-05	0.0411204	34.8003
uncharacterized LOC100162850	NC_042494.1	10974267	-	4.30062e-06	0.0269564	34.7902
RNA polymerase-associated protein CTR9 homolog	NC_042495.1	54712912	-	2.5341e-06	0.0214328	34.7368
exocyst complex component 4-like	NC_042494.1	127998182	-	8.66044e-08	0.0036057	34.6939
uncharacterized protein KIAA2013 homolog	NC_042493.1	32211444	-	7.59965e-07	0.0115074	34.6687
coiled-coil domain-containing protein 12-like	NC_042494.1	145514389	+	8.94829e-07	0.0125895	34.6667
run domain Beclin-1 interacting and cystein-rich containing protein-like	NC_042493.1	88902514	+	9.34331e-07	0.0127906	34.6517
N/A	NC_042495.1	50361270	-	1.06263e-06	0.0137759	34.637
LOC115033506	NC_042494.1	14776185	+	7.01072e-06	0.0341427	34.6169
N/A	NC_042494.1	124576315	+	3.86206e-10	0.000185161	34.6154
tropomodulin-like	NC_042494.1	87871440	+	1.06046e-05	0.040983	34.5599
ethanolaminephosphotransferase 1-like	NC_042496.1	15153001	+	6.0243e-06	0.0318862	34.5532
thyroid adenoma-associated protein homolog	NC_042494.1	68746593	+	1.15835e-05	0.0426209	34.5411
N/A	NC_042495.1	51214469	+	4.43722e-06	0.0274314	34.5405
zinc finger protein Xfin-like	NC_042496.1	36009546	+	3.60996e-06	0.024878	34.4429
protein timeless homolog	NC_042494.1	56292762	-	2.89193e-08	0.00214416	34.4262
ubiquitin-protein ligase E3B-like	NC_042495.1	65761263	-	1.19732e-06	0.0149176	34.4029
uncharacterized LOC100167337	NC_042494.1	31438207	-	3.54678e-06	0.0247063	34.3939
e3 ubiquitin-protein ligase Bre1-like	NC_042495.1	65545889	-	1.724e-06	0.0181961	34.375
COMM domain containing 3	NC_042495.1	48624257	-	1.34729e-05	0.0453319	34.3671
hormone-sensitive lipase-like	NC_042496.1	8362116	-	9.49668e-06	0.0390552	34.2365
uncharacterized LOC100144801	NC_042495.1	90314019	+	4.40793e-07	0.00879831	34.2105
NCK-interacting protein with SH3 domain-like	NC_042496.1	21098234	-	9.87853e-06	0.0397755	34.1414
uncharacterized LOC100571594	NC_042496.1	39978256	-	1.46435e-05	0.0469254	34.1391
alpha-actinin, sarcomeric-like	NC_042495.1	35019044	+	1.12585e-05	0.0421867	34.0987
phosphoglycerate mutase family member 5 (EC:3.1.3.16)	NC_042494.1	83283243	+	6.29445e-06	0.0322809	34.058
dual specificity protein phosphatase 3-like	NC_042495.1	43504325	-	9.806e-06	0.0395689	34.0395
protein king tubby-like	NC_042494.1	44327840	+	3.09527e-06	0.0231434	34.033
kelch-like protein 17-like	NC_042493.1	125562891	+	4.31225e-07	0.00872515	34
cell cycle checkpoint protein RAD1-like	NC_042495.1	115763519	+	1.51736e-06	0.0168086	34
uncharacterized LOC100164427	NC_042496.1	28584417	+	6.9487e-06	0.0339685	34
RNA-binding protein 42-like	NC_042494.1	59746274	-	8.67914e-06	0.0374455	33.9394
N/A	NC_042496.1	32822453	+	1.44327e-05	0.0466674	33.9286
possible pseudogene or miscRNA, No KEGG entry	NC_042494.1	17732594	+	1.07662e-05	0.041254	33.9139
tyrosine-protein phosphatase 99A-like	NC_042493.1	47956878	-	7.85231e-06	0.0360978	33.7462
general transcription factor IIH subunit 4-like	NC_042494.1	147910554	+	2.67266e-09	0.000519084	33.7457
N/A	NC_042494.1	54701302	-	7.81713e-06	0.036039	33.7264
uncharacterized LOC100160670	NC_042496.1	18710763	-	3.38726e-06	0.0241546	33.6325
uncharacterized LOC100164676	NC_042493.1	16029018	+	9.62022e-06	0.0391529	33.5235
N/A	NC_042494.1	85553157	+	6.79847e-06	0.0336273	33.4416
autophagy-related protein 2 homolog B-like	NC_042494.1	14224644	+	8.54601e-07	0.0122692	33.3995
uncharacterized LOC100165355	NC_042494.1	152142653	-	1.2109e-05	0.0433893	33.3333
carboxypeptidase D-like	NC_042495.1	11366458	-	4.25431e-06	0.0268214	33.3333
ring canal kelch homolog	NC_042495.1	25856190	+	5.8562e-06	0.0314136	33.3333
UDP-N-acetylglucosamine--peptide N-acetylglucosaminyltransferase 110 kDa subunit-like	NC_042495.1	36549595	-	4.02356e-08	0.00248852	33.3333
hormone-sensitive lipase-like	NC_042496.1	8359770	-	1.23432e-06	0.0151132	33.3333
lon protease homolog, mitochondrial-like	NC_042496.1	9156002	+	1.55688e-06	0.0171142	33.3333
nuclease HARBI1-like	NC_042494.1	86554894	+	4.85053e-06	0.028697	33.2917
coiled-coil and C2 domain-containing protein 2A-like	NC_042496.1	35478819	-	3.69916e-06	0.0251684	33.2816
N/A	NC_042495.1	6777367	+	1.5381e-05	0.0482041	33.2562
metal transporter CNNM2-like	NC_042493.1	91487076	-	4.82468e-06	0.0286409	33.2259
uncharacterized protein KIAA1109-like	NC_042494.1	117616114	-	7.65957e-06	0.0357203	33.1935
uncharacterized LOC100568595	NC_042494.1	18690111	+	1.58344e-05	0.0488777	33.1921
MPN domain-containing protein CG4751-like	NC_042493.1	76393311	-	1.18394e-05	0.042949	33.1089
# protein OSCP1 & protein aveugle	NC_042495.1	7925491	-	2.36195e-07	0.00638112	33.1002
DNA repair protein XRCC3-like	NC_042494.1	72677545	-	6.9539e-06	0.0339689	33.0983
zinc finger protein ubi-d4-like	NC_042493.1	67217521	-	2.3404e-06	0.0205304	33.0877
cytosolic non-specific dipeptidase-like	NC_042494.1	153728807	+	6.28998e-06	0.0322809	33.0113
possible pseudogene or miscRNA, No KEGG entry	NC_042493.1	29804209	+	9.37511e-06	0.0387789	32.9545
N/A	NC_042495.1	50442418	-	2.62981e-06	0.0217475	32.7381
mediator of RNA polymerase II transcription subunit 15-like	NC_042495.1	118821503	-	5.62367e-06	0.03087	32.728
N/A	NC_042495.1	115625892	-	3.34271e-06	0.0240318	32.7089
uncharacterized LOC100164870	NC_042493.1	11074761	+	2.97839e-06	0.0228498	32.6981
glycerol kinase-like	NC_042493.1	78626020	+	1.07813e-05	0.0412828	32.614
EH domain-containing protein 1-like	NC_042496.1	15849246	-	8.99406e-06	0.037957	32.5662
zinc transporter ZIP3-like	NC_042495.1	79918182	+	4.4494e-06	0.0274753	32.5581
transmembrane protein 129-like	NC_042495.1	105789648	-	1.21598e-06	0.0150251	32.5036
tetratricopeptide repeat protein 28-like	NC_042496.1	30293595	-	1.37691e-05	0.0457205	32.3636
src substrate cortactin-like	NC_042495.1	65393265	+	9.62246e-06	0.0391529	32.3232
N/A	NC_042494.1	114621098	+	9.41131e-06	0.0388544	32.2581
protein ECT2-like	NC_042495.1	64072044	+	1.2443e-05	0.0439002	32.1805
protein crumbs-like	NC_042494.1	26806395	-	1.12996e-05	0.0421905	32.144
# GSK3-beta interaction protein-like & phosphatidylinositol 4-phosphate 5-kinase type-1 alpha	NC_042495.1	49015919	+	8.80826e-06	0.0376722	32.1372
possible pseudogene or miscRNA, No KEGG entry	NC_042495.1	67587476	-	5.09963e-07	0.00926223	32.122
uncharacterized LOC100159378	NC_042494.1	28574626	-	6.97882e-06	0.0340599	32.0695
N/A	NC_042493.1	76017725	+	8.12229e-06	0.0365178	32.0536
N/A	NC_042495.1	6514843	+	2.40246e-06	0.0207885	32.0418
homeobox protein koza-like	NC_042495.1	8456997	-	4.1086e-06	0.0263757	32.0202
uncharacterized protein KIAA0556-like	NC_042494.1	147858781	+	7.02059e-06	0.034156	32.0099
DNA polymerase delta subunit 2-like	NC_042495.1	45567944	-	2.29849e-06	0.0203256	32
uncharacterized LOC100168927	NC_042495.1	72081027	-	2.80807e-06	0.0222318	32
translational activator GCN1-like	NC_042495.1	76681334	-	7.27119e-07	0.0112493	32
# endoribonuclease Dcr-1 & nuclear pore complex protein Nup205	NC_042495.1	75246113	-	1.12771e-05	0.0421905	31.9594
N/A	NC_042495.1	102810616	-	1.51434e-05	0.0477082	31.9444
CCR4-NOT transcription complex subunit 1-like	NC_042493.1	56119297	-	5.45676e-08	0.00280622	31.9444
NADH dehydrogenase [ubiquinone] 1 alpha subcomplex subunit 10, mitochondrial-like	NC_042495.1	89623902	+	8.88326e-07	0.0125536	31.9289
uncharacterized LOC100159378	NC_042494.1	28574616	-	1.38331e-05	0.0458487	31.8167
possible pseudogene or miscRNA, No KEGG entry	NC_042494.1	78044246	+	5.19191e-06	0.029705	31.7949
uncharacterized LOC100575043	NC_042494.1	60124088	+	2.87246e-07	0.00705082	31.7073
endoribonuclease Dcr-1-like	NC_042493.1	119160847	+	5.26444e-07	0.0093883	31.6667
LOC107883287	NC_042493.1	41889780	-	1.49969e-05	0.0475235	31.5895
N/A	NC_042493.1	100910841	+	5.9078e-07	0.0100711	31.5789
oxysterol-binding protein 1-like	NC_042494.1	80896708	+	1.15263e-05	0.0425326	31.5789
peroxisome biogenesis factor 2-like	NC_042494.1	109097511	+	1.14129e-06	0.0144157	31.5789
N/A	NC_042495.1	107478095	-	1.39784e-06	0.0161815	31.5789
protein strawberry notch-like	NC_042496.1	8573663	-	1.6527e-05	0.0498188	31.5789
coiled-coil and C2 domain-containing protein 2A-like	NC_042496.1	35486113	-	1.79211e-06	0.018388	31.5789
ribosomal protein L27 (EC:3.6.5.3)	NC_042494.1	87317298	-	1.65064e-05	0.0497855	31.5318
ATPase family AAA domain-containing protein 2B-like	NC_042494.1	76520909	+	9.9731e-08	0.00396334	31.5068
protein mothers against dpp-like	NC_042496.1	8469170	-	5.66451e-06	0.0309219	31.4867
arfaptin-1-like	NC_042495.1	75283369	+	1.09041e-05	0.0415326	31.4596
possible pseudogene or miscRNA, No KEGG entry	NC_042494.1	169392845	-	6.76208e-06	0.0335355	31.4014
transcription termination factor 2-like	NC_042495.1	19062109	+	8.36144e-06	0.0369888	31.3782
ubiquitin-conjugating enzyme E2 O-like	NC_042493.1	114778040	-	1.30129e-06	0.0154455	31.3725
N/A	NC_042494.1	127990297	+	4.57771e-07	0.00891822	31.297
neuropathy target esterase sws-like	NC_042494.1	130375532	-	8.41077e-06	0.0370104	31.2963
N/A	NC_042495.1	115267961	-	9.59119e-06	0.0391529	31.2925
LOC100158874	NC_042495.1	77066015	+	2.8098e-06	0.0222318	31.257
gamma-tubulin complex component 6-like	NC_042495.1	108199888	+	9.4808e-06	0.0390223	31.25
N/A	NC_042494.1	130924428	-	7.59543e-06	0.035516	31.2337
N(4)-(Beta-N-acetylglucosaminyl)-L-asparaginase-like	NC_042494.1	44323596	+	1.23931e-05	0.0438986	31.1851
battenin-like	NC_042493.1	57269617	-	3.51422e-07	0.00785015	31.1475
ubiquinone biosynthesis protein COQ7 homolog	NC_042495.1	74514252	-	6.67442e-06	0.0333102	31.1266
e3 ubiquitin-protein ligase NEDD4-like	NC_042495.1	51384792	+	8.17939e-06	0.0366326	31.1111
serine/arginine-rich splicing factor 1-like	NC_042494.1	93280860	+	6.57182e-07	0.0107461	31.0345
# uncharacterized LOC100571891 & uncharacterized LOC100575333	NC_042493.1	45252686	-	2.02531e-06	0.0194469	31.0214
helicase POLQ-like	NC_042496.1	19109998	+	1.07483e-05	0.041244	31.015
possible pseudogene or miscRNA, No KEGG entry	NC_042494.1	57972926	-	1.28105e-05	0.0444321	30.9859
N/A	NC_042495.1	112104735	+	1.02248e-05	0.040292	30.977
protein sidekick-like	NC_042494.1	71251524	+	2.05215e-06	0.0195447	30.9687
dynamin-1-like protein-like	NC_042493.1	18088730	-	9.12924e-06	0.0383007	30.9642
N/A	NC_042494.1	32122399	-	6.31453e-06	0.0322809	30.9463
LOC103310328	NC_042496.1	27940040	-	3.00433e-06	0.0228498	30.9001
possible pseudogene or miscRNA, No KEGG entry	NC_042496.1	15282879	+	5.52435e-06	0.0305855	30.8931
LOC100163269	NC_042495.1	107487782	-	3.68233e-06	0.0251487	30.8718
transformation/transcription domain-associated protein-like	NC_042493.1	8223597	+	1.17233e-05	0.0427508	30.8651
cytochrome b5 reductase 4-like	NC_042495.1	77486948	+	1.16066e-05	0.0426478	30.7895
heterogeneous nuclear ribonucleoprotein-like	NC_042495.1	89344573	-	8.0928e-06	0.0365015	30.7724
N/A	NC_042495.1	74288181	-	6.13895e-06	0.0320415	30.7692
zinc finger and SCAN domain-containing protein 2-like	NC_042493.1	81814001	+	9.19676e-06	0.0383637	30.7505
uncharacterized LOC100163696	NC_042495.1	51620693	+	2.00417e-06	0.0193738	30.7337
# legumain & uncharacterized LOC100570989	NC_042493.1	4077575	+	8.11842e-06	0.0365178	30.7213
fatty acid synthase-like	NC_042494.1	66978790	+	4.32852e-06	0.0270144	30.6939
N/A	NW_021764100.1	11889	+	9.88142e-06	0.0397755	30.6923
RNA polymerase-associated protein CTR9 homolog	NC_042495.1	54706867	-	6.38303e-06	0.0324392	30.6122
Vasa4 protein	NC_042494.1	161287422	+	1.19103e-06	0.0149034	30.53
UPF0534 protein C4orf43 homolog	NC_042495.1	60257654	-	1.17428e-06	0.0147807	30.4848
N/A	NC_042495.1	18963477	+	1.24573e-05	0.0439002	30.4386
N/A	NC_042493.1	91956720	-	1.2244e-06	0.0150273	30.4348
# double-stranded RNA-specific editase Adar & uncharacterized LOC100573884	NC_042494.1	119815715	+	1.36153e-05	0.0455097	30.4348
PR domain zinc finger protein 16-like	NC_042495.1	39193781	+	1.69949e-06	0.018107	30.4348
cold shock domain-containing protein E1-like	NC_042495.1	84905159	+	1.44703e-06	0.0164845	30.4224
protein O-mannosyltransferase 1-like	NC_042493.1	34728032	+	6.72502e-06	0.0334326	30.3846
N/A	NC_042496.1	42030444	-	5.35569e-06	0.0302567	30.3571
N/A	NC_042495.1	35141627	-	2.57755e-06	0.0215457	30.3276
uncharacterized LOC100165265	NC_042494.1	61187512	+	1.10275e-06	0.0141101	30.303
replication protein A 70 kDa DNA-binding subunit-like	NC_042494.1	98587652	-	4.66628e-07	0.00900391	30.2326
uncharacterized LOC100160892	NC_042494.1	119126744	+	2.39987e-06	0.0207885	30.2326
lysosomal protein NCU-G1-B-like	NC_042494.1	133560859	+	3.89684e-06	0.0257369	30.2083
N/A	NW_021774461.1	1104	-	2.4348e-06	0.0209511	30.202
Krueppel-like factor 7-like	NC_042494.1	66066210	+	9.01193e-06	0.0380176	30.1887
N/A	NC_042493.1	114279989	+	7.0094e-07	0.0110709	30.1205
protein fuzzy-like	NC_042494.1	130396030	+	1.32508e-05	0.0450219	30.0546
NTF2 export factor-like	NC_042493.1	35093899	-	7.64794e-06	0.0356845	30
N/A	NC_042493.1	47261812	+	1.0569e-05	0.0409625	30
protein KIAA0664 homolog	NC_042495.1	76924424	-	1.62674e-05	0.0494617	30
uncharacterized LOC100158740	NC_042495.1	100241355	+	4.22006e-08	0.00248852	30
uncharacterized LOC100168926	NC_042493.1	73656219	-	1.71262e-07	0.00550116	29.8688
protocadherin-like wing polarity protein stan-like	NC_042495.1	63834233	-	4.60539e-07	0.00891822	29.8661
uncharacterized LOC100168970	NC_042494.1	67173391	+	1.44541e-05	0.0466674	29.858
N/A	NC_042494.1	61542507	+	1.48733e-05	0.0472701	29.7568
activated RNA polymerase II transcriptional coactivator p15-like	NC_042495.1	84612764	+	6.08214e-06	0.0319365	29.7297
uncharacterized LOC100161573	NC_042495.1	102821550	+	2.6603e-06	0.0218645	29.7225
low-density lipoprotein receptor-related protein 1-like	NC_042494.1	3298081	+	3.27989e-06	0.0238615	29.7043
uncharacterized LOC100568931	NC_042494.1	55783690	-	1.16723e-05	0.042711	29.6627
isoleucyl-tRNA synthetase, cytoplasmic-like	NC_042494.1	44282051	+	2.32832e-06	0.0204743	29.6296
homeotic protein ultrabithorax-like	NC_042494.1	143837698	+	2.70512e-06	0.0219139	29.6186
N/A	NC_042494.1	158457366	-	4.03371e-08	0.00248852	29.5775
uncharacterized LOC100570959	NC_042495.1	83106833	+	1.49336e-06	0.0166655	29.5193
ADP-ribosylation factor-like 4A	NC_042494.1	51700331	+	8.7258e-06	0.0375234	29.4715
JNK-interacting protein 3-like	NC_042494.1	151844333	-	6.85492e-06	0.0337397	29.3718
N/A	NC_042493.1	29756592	-	8.78044e-06	0.0376574	29.3506
# CCR4-NOT transcription complex subunit 6-like & protein YIPF7	NC_042496.1	41729188	-	3.57139e-07	0.00793434	29.3182
39S ribosomal protein L42, mitochondrial-like	NC_042494.1	66553834	+	8.65505e-07	0.0123601	29.3103
N/A	NC_042495.1	104890257	-	4.74233e-08	0.00257521	29.3103
down syndrome cell adhesion molecule	NC_042496.1	28301174	-	1.77728e-06	0.0183183	29.3103
origin recognition complex subunit 3-like	NC_042494.1	125339663	+	1.16755e-05	0.042711	29.2763
ubiquitin-conjugating enzyme E2 C-like	NC_042494.1	16639296	-	3.22959e-06	0.0236856	29.2683
heterogeneous nuclear ribonucleoprotein K-like	NC_042495.1	37023691	-	8.00635e-06	0.036345	29.2683
uncharacterized MFS-type transporter C19orf28-like	NC_042494.1	87760263	-	3.01009e-06	0.0228498	29.1667
uncharacterized LOC100164427	NC_042496.1	28584353	+	1.47963e-08	0.00150631	29.1667
syntaxin-binding protein 5-like	NC_042494.1	93457441	-	2.70194e-07	0.00683369	29.0909
uncharacterized LOC100570154	NC_042494.1	116380473	-	1.64277e-06	0.0177171	29.0909
multidrug resistance-associated protein 1-like	NC_042494.1	146007207	+	1.07192e-05	0.0412198	29.0223
# chromatin-remodeling ATPase INO80 & uncharacterized LOC100167552	NC_042496.1	27652119	-	4.70485e-06	0.0282249	28.9993
# calcium/calmodulin-dependent protein kinase type II subunit gamma & 26S proteasome non-ATPase regulatory subunit 13	NC_042494.1	153005295	+	1.17428e-05	0.0427626	28.9904
uncharacterized protein LOC100302321	NC_042494.1	118158817	-	6.49178e-06	0.0327307	28.9842
uncharacterized LOC100165745	NC_042495.1	77111835	-	3.91399e-06	0.0257403	28.9298
ribosomal protein S11	NC_042494.1	126636792	-	4.983e-06	0.0291255	28.8889
negative elongation factor B-like	NC_042496.1	25002691	+	1.29425e-06	0.0154455	28.7637
late secretory pathway protein AVL9 homolog	NC_042495.1	4684623	+	1.82101e-06	0.018447	28.6801
N/A	NC_042494.1	24697850	+	3.15228e-07	0.00738593	28.6392
uncharacterized LOC100168513	NC_042496.1	28582106	+	8.64531e-06	0.0373629	28.6072
N/A	NC_042493.1	34004544	+	2.82568e-07	0.00699947	28.5714
LOC100162362	NC_042495.1	13113312	-	7.20195e-06	0.0346336	28.5714
uncharacterized LOC100569146	NC_042495.1	51431624	-	3.64625e-06	0.0250278	28.5714
zinc finger protein 544-like	NC_042495.1	84580076	+	1.37756e-05	0.0457281	28.5256
protein pigeon-like	NC_042494.1	47739106	+	2.03977e-07	0.00598889	28.4712
uncharacterized LOC100168407	NC_042494.1	43001810	-	1.13259e-05	0.0422038	28.3333
uncharacterized protein LOC100158668	NC_042494.1	158352656	-	3.75927e-06	0.0253543	28.3166
N/A	NC_042494.1	113979034	-	4.14607e-07	0.00859783	28.3019
N/A	NC_042494.1	54084256	-	9.77857e-06	0.0395265	28.2609
protein scribble homolog	NC_042495.1	103855719	+	1.65613e-05	0.0498489	28.1818
mitogen-activated protein kinase kinase kinase kinase 3-like	NC_042496.1	41926541	-	1.65613e-05	0.0498489	28.1818
LOC115033895	NC_042494.1	157232451	+	1.39917e-06	0.0161815	28.1538
small G protein signaling modulator 1-like	NC_042494.1	78081264	+	9.4113e-06	0.0388544	28.125
serine/threonine-protein phosphatase 4 regulatory subunit 4-like	NC_042495.1	10429778	-	2.48588e-06	0.0212554	28.0952
N/A	NC_042495.1	18677440	+	5.42715e-07	0.0095216	28.0702
N/A	NC_042495.1	74087721	+	1.12509e-05	0.0421867	28.0064
uncharacterized protein CG42248-like	NC_042494.1	68655170	-	3.73924e-06	0.025298	28
probable E3 ubiquitin-protein ligase HERC4-like	NC_042494.1	83461999	-	1.29789e-05	0.044666	28
N/A	NC_042495.1	63399633	-	4.38789e-06	0.0272172	28
microspherule protein 1-like	NC_042494.1	120083098	+	4.07949e-06	0.0263484	27.9926
N/A	NW_021763787.1	20125	-	1.06215e-05	0.0410188	27.9729
N/A	NC_042495.1	99405675	+	1.24335e-05	0.0439002	27.9326
N/A	NC_042494.1	73680308	+	4.24023e-06	0.0267951	27.907
N/A	NC_042494.1	79461950	-	4.10305e-06	0.0263757	27.8966
N/A	NC_042493.1	62112579	-	5.41709e-07	0.00951937	27.8689
protein tramtrack, alpha isoform-like	NC_042495.1	13419435	+	8.8524e-07	0.0125263	27.8689
mitochondrial import receptor subunit TOM40 homolog 2-like	NC_042495.1	43728654	+	2.03085e-06	0.0194469	27.8351
uncharacterized LOC100164227	NC_042494.1	24824859	+	5.35215e-06	0.0302567	27.8133
eukaryotic translation initiation factor 4H-like	NC_042494.1	130347408	-	4.16146e-06	0.0265199	27.795
protein decapentaplegic-like	NC_042493.1	7897834	+	1.68552e-06	0.0180445	27.7778
N/A	NW_021770132.1	59725	-	1.90795e-06	0.0187874	27.7778
ring canal kelch homolog	NC_042495.1	24814315	+	4.604e-06	0.027983	27.6596
probable cytosolic Fe-S cluster assembly factor AAEL012261-like	NC_042495.1	103402291	+	2.7347e-07	0.0068684	27.6596
uncharacterized LOC100164056	NC_042494.1	119435971	-	3.51485e-06	0.0245591	27.5914
TM2 domain-containing protein-like	NC_042495.1	19070116	-	2.35145e-06	0.0205607	27.5862
LOC107883900	NC_042495.1	17194687	+	1.60744e-05	0.0491396	27.5507
# GSK3-beta interaction protein-like & phosphatidylinositol 4-phosphate 5-kinase type-1 alpha	NC_042495.1	49015951	+	2.06078e-06	0.0195447	27.5072
N/A	NC_042493.1	72949930	+	8.66247e-06	0.0373884	27.5
LOC107883931	NC_042495.1	92342185	-	5.79619e-06	0.0312236	27.5
putative U5 small nuclear ribonucleoprotein 200 kDa helicase-like	NC_042494.1	106156685	+	1.40832e-05	0.0462667	27.4905
N/A	NC_042495.1	91176292	-	4.27875e-07	0.00870597	27.4721
# sushi, von Willebrand factor type A, EGF and pentraxin domain-containing protein 1 & xenotropic and polytropic retrovirus receptor 1	NC_042494.1	154851925	+	1.57248e-05	0.0487761	27.4718
IQ motif and SEC7 domain-containing protein 1-like	NC_042493.1	65491255	-	2.92622e-06	0.0227076	27.4698
N/A	NC_042493.1	1430042	-	9.1409e-06	0.0383227	27.4586
uncharacterized LOC100159172	NC_042495.1	88162146	+	1.59339e-05	0.0489642	27.4585
60S ribosomal protein L6-like	NC_042496.1	39128935	+	3.28084e-06	0.0238615	27.451
uncharacterized LOC100160518	NC_042496.1	39285160	+	1.00728e-05	0.0400137	27.451
N/A	NC_042495.1	102301818	-	8.50536e-06	0.0371249	27.3148
fatty acid synthase-like	NC_042494.1	3727996	-	4.78174e-08	0.00257521	27.2727
N/A	NC_042494.1	144137368	+	1.77662e-06	0.0183183	27.2727
LOC100166016	NC_042493.1	61813868	+	1.1241e-07	0.00419317	27.241
N/A	NC_042494.1	121028314	-	9.08601e-07	0.0126395	27.1186
N/A	NW_021770531.1	7498	-	1.65258e-05	0.0498188	27.0996
LOC100169111	NC_042495.1	101680206	-	1.38702e-05	0.0459433	27.0845
protein zer-1 homolog	NC_042494.1	149140799	-	3.0958e-06	0.0231434	27.0833
monocarboxylate transporter 10-like	NC_042495.1	65992446	+	7.48001e-06	0.0352966	27.0833
coiled-coil domain containing 47	NC_042495.1	52037464	+	1.17618e-05	0.0427726	27.0592
LOC107882537	NC_042493.1	54200144	-	8.11838e-08	0.00345986	27.027
cAMP-specific 3',5'-cyclic phosphodiesterase-like	NC_042495.1	100087275	+	1.19871e-05	0.0431815	26.9841
ras-specific guanine nucleotide-releasing factor 1-like	NC_042496.1	38577760	-	8.04766e-07	0.0118374	26.9231
solute carrier family 25 member 40-like	NC_042495.1	86766638	+	4.39596e-06	0.027223	26.9095
uncharacterized LOC100162857	NC_042493.1	51618355	-	2.61935e-06	0.0217273	26.8293
uncharacterized LOC100169054	NC_042493.1	59664425	-	7.08254e-06	0.0343186	26.8293
N/A	NC_042493.1	14388033	+	1.47693e-06	0.0166208	26.8049
carbohydrate sulfotransferase 11-like	NC_042493.1	32293763	+	6.35671e-07	0.0105441	26.7857
transmembrane emp24 domain-containing protein eca-like	NC_042494.1	118106171	+	6.22933e-06	0.0322597	26.7857
homeobox protein SIX6-like	NC_042495.1	35503888	+	4.49923e-06	0.0276746	26.7857
N/A	NC_042494.1	97603890	-	6.86716e-07	0.0109965	26.6667
uncharacterized LOC100571489	NC_042494.1	99904900	+	1.69005e-06	0.0180599	26.6667
uncharacterized LOC100571379	NC_042495.1	88931450	-	1.09814e-05	0.0416513	26.6667
vacuolar protein sorting-associated protein 33B-like	NC_042496.1	5267691	+	1.53709e-05	0.0481864	26.6667
eukaryotic translation initiation factor 2-alpha kinase-like	NC_042494.1	105425739	-	7.21417e-06	0.0346462	26.5793
nuclear pore complex protein Nup107-like	NC_042494.1	90685517	+	1.45689e-06	0.0165311	26.5625
N/A	NC_042494.1	24697823	+	3.40971e-06	0.0241563	26.5537
N/A	NC_042493.1	129474498	+	1.03686e-05	0.0404233	26.5306
N/A	NC_042495.1	47583738	-	7.67212e-06	0.0357203	26.5306
uncharacterized LOC100573715	NC_042495.1	80258626	+	8.91117e-06	0.0378283	26.5306
LOC103308825	NC_042495.1	93010405	-	3.67871e-07	0.00795921	26.5306
uncharacterized LOC100167749	NC_042493.1	89727373	-	7.85769e-06	0.0360978	26.4829
uncharacterized LOC100575183	NC_042495.1	40991851	-	2.07286e-06	0.0195447	26.4706
uncharacterized LOC100160807	NC_042495.1	56960195	+	1.63545e-05	0.0495791	26.4706
N/A	NC_042494.1	13322917	-	8.62906e-06	0.0373579	26.4151
importin-7-like	NC_042495.1	71919747	+	1.54288e-05	0.0482284	26.4006
coiled-coil domain-containing protein 22 homolog	NC_042493.1	47302802	-	1.2082e-05	0.0433289	26.3653
26S protease regulatory subunit 10B-like	NC_042496.1	40806767	-	1.18624e-06	0.0148621	26.341
sodium-independent sulfate anion transporter-like	NC_042494.1	43833331	+	4.51517e-06	0.0277548	26.3158
N/A	NC_042495.1	44514770	+	4.10496e-06	0.0263757	26.3158
# zinc finger SWIM domain-containing protein 3 & uncharacterized LOC103309980	NC_042493.1	43032962	+	6.56903e-08	0.00307619	26.3116
N/A	NC_042494.1	150681748	-	1.77127e-08	0.00165291	26.25
DNA-dependent protein kinase catalytic subunit-like	NC_042494.1	73762504	-	1.48308e-05	0.047212	26.2295
N/A	NC_042495.1	26209295	-	9.77529e-06	0.0395265	26.1905
guanine nucleotide-binding protein G(q) subunit alpha-like	NC_042494.1	141054577	-	2.77792e-06	0.022127	26.1538
probable G-protein coupled receptor CG31760-like	NC_042495.1	61044311	+	1.40263e-05	0.0461784	26.1444
N/A	NC_042495.1	99421221	+	2.09996e-06	0.0196606	26.0274
LOC103310517	NC_042496.1	27207395	-	2.24377e-06	0.0201064	26.0078
N/A	NC_042493.1	104792459	-	7.19826e-08	0.00324668	26.0037
GTPase-activating protein and VPS9 domain-containing protein 1-like	NC_042496.1	14289755	-	7.18448e-06	0.0345803	25.964
N/A	NC_042496.1	33944491	+	8.79509e-07	0.0124942	25.9524
probable anion transporter 2, chloroplastic-like	NC_042495.1	65640579	-	5.9037e-08	0.00291324	25.9352
N/A	NC_042493.1	97793768	+	1.32945e-06	0.0156086	25.9259
LOC115034264	NC_042495.1	85226957	-	7.82769e-07	0.0117147	25.9259
lysine-specific demethylase 3A-like	NC_042495.1	115434505	+	1.04462e-05	0.0406321	25.89
choline transporter-like protein 2-like	NC_042496.1	35981782	+	1.32551e-05	0.0450219	25.7727
cAMP-specific 3',5'-cyclic phosphodiesterase-like	NC_042495.1	100155646	-	1.43568e-05	0.0465757	25.7143
cytoskeleton-associated protein 5-like	NC_042495.1	115757336	+	5.94208e-06	0.0317641	25.7102
phosphatidylinositide phosphatase SAC1-like	NC_042496.1	27268788	-	5.94208e-06	0.0317641	25.7102
putative oxidoreductase GLYR1 homolog	NC_042494.1	153588960	+	7.83512e-07	0.0117147	25.6098
N/A	NC_042494.1	78189888	+	2.19933e-06	0.0200475	25.5319
protein strawberry notch-like	NC_042496.1	8569766	+	5.99686e-06	0.0318589	25.5319
pre-mRNA-splicing factor 38B-like	NC_042496.1	33632299	-	1.55445e-05	0.0483943	25.5319
N/A	NW_021771312.1	38468	+	1.02386e-05	0.0403077	25.5319
heterogeneous nuclear ribonucleoprotein 87F-like	NC_042494.1	62905171	-	9.2838e-06	0.0385634	25.4902
DNA replication licensing factor MCM4-like	NC_042494.1	140318548	+	1.18367e-05	0.042949	25.4545
N/A	NC_042494.1	102637049	+	3.20717e-07	0.00748216	25.4347
N/A	NC_042493.1	121728882	+	3.71378e-07	0.0079923	25.4237
N/A	NC_042494.1	49214303	+	9.79308e-07	0.0131362	25.3968
integral membrane protein 2B-like	NC_042493.1	82153670	+	5.17154e-06	0.0296576	25.3731
uncharacterized LOC100160811	NC_042494.1	152645027	+	2.31211e-07	0.00638112	25.3521
N/A	NC_042495.1	31228752	-	7.49151e-07	0.011432	25.0588
limkain-b1-like	NC_042495.1	76146122	-	1.66621e-06	0.0178934	25.0375
N/A	NC_042495.1	72325832	+	4.56531e-06	0.0279392	-25.0046
N/A	NC_042495.1	119293532	-	6.36695e-07	0.0105441	-25.0451
N/A	NC_042494.1	82645441	-	1.28873e-05	0.0445727	-25.102
LOC100160819	NC_042495.1	75600340	-	1.23353e-05	0.0437512	-25.2137
N/A	NC_042494.1	110781273	+	5.91618e-06	0.0316569	-25.2174
LOC100573477	NC_042496.1	42017006	+	8.95886e-06	0.0379098	-25.2364
attractin-like protein 1-like	NC_042496.1	22888923	+	1.08242e-05	0.0413466	-25.2706
protein ariadne-2-like	NC_042495.1	65632833	+	1.31363e-05	0.0448915	-25.3081
aminopeptidase 1-like	NC_042494.1	162366992	+	6.34923e-06	0.0323557	-25.3722
N/A	NC_042494.1	45487657	-	5.89607e-06	0.0316052	-25.387
uncharacterized LOC100568628	NC_042493.1	76782802	+	1.64445e-05	0.0496823	-25.3968
CTD nuclear envelope phosphatase 1 (EC:3.1.3.16)	NC_042496.1	6772143	-	8.48933e-07	0.0122528	-25.3968
innexin inx2-like	NC_042493.1	39834577	+	2.66196e-08	0.00204364	-25.4014
N/A	NC_042495.1	15466655	-	2.90427e-06	0.0226175	-25.4237
N/A	NC_042495.1	22812280	-	8.43987e-06	0.0370208	-25.4237
N/A	NW_021770725.1	3181	-	7.21221e-06	0.0346462	-25.4237
uncharacterized LOC100161761	NC_042495.1	47661408	-	8.23449e-07	0.0119594	-25.4545
# eukaryotic initiation factor 4A & uncharacterized LOC100569725	NC_042495.1	53319682	+	1.38289e-05	0.0458487	-25.4545
protocadherin-like wing polarity protein stan-like	NC_042495.1	63826817	-	1.61851e-05	0.0493804	-25.4545
N/A	NC_042493.1	119002936	+	6.45085e-06	0.0325906	-25.463
N/A	NC_042493.1	6922727	-	1.8298e-06	0.018447	-25.4902
N/A	NC_042494.1	42639638	+	9.83463e-07	0.0131756	-25.4902
ring canal kelch homolog	NC_042495.1	23348018	+	1.07328e-05	0.0412249	-25.4902
N/A	NC_042495.1	64540489	-	1.24284e-05	0.0439002	-25.4902
LOC103307712	NC_042495.1	17719433	+	9.11877e-06	0.0383007	-25.5231
hsp70-binding protein 1-like	NC_042493.1	125239861	-	1.55445e-05	0.0483943	-25.5319
uncharacterized LOC100158740	NC_042495.1	100212257	+	2.19933e-06	0.0200475	-25.5319
LOC107882329	NC_042495.1	17455621	+	2.35533e-07	0.00638112	-25.5731
uncharacterized LOC100163955	NC_042493.1	12482772	+	3.09561e-06	0.0231434	-25.5814
N/A	NC_042493.1	131473554	+	1.03375e-05	0.0404164	-25.5814
protein midA homolog, mitochondrial-like	NC_042496.1	33533436	+	1.12815e-05	0.0421905	-25.5814
N/A	NC_042493.1	108040984	+	1.41828e-05	0.0463038	-25.6215
N/A	NC_042493.1	37561753	-	2.07456e-06	0.0195447	-25.6328
ruvB-like 2-like	NC_042495.1	98871092	-	5.03674e-06	0.0292815	-25.641
bone morphogenetic protein receptor type-1B-like	NC_042496.1	12783361	-	8.40394e-06	0.0370104	-25.6944
LOC107882182	NC_042493.1	68542537	-	7.01345e-06	0.0341427	-25.7025
N/A	NC_042493.1	91692138	+	1.23199e-05	0.0437109	-25.7035
N/A	NC_042493.1	21763181	-	6.8919e-06	0.0337881	-25.7143
RNA polymerase II elongation factor ELL-like	NC_042495.1	114941886	+	6.68829e-06	0.0333641	-25.732
N/A	NC_042493.1	94535189	-	1.18611e-05	0.0429767	-25.7368
# legumain & uncharacterized LOC100571675 & uncharacterized LOC107883579	NC_042493.1	4021750	+	1.31902e-06	0.0155705	-25.7566
poly(rC)-binding protein 3-like	NC_042495.1	47042761	-	1.44982e-06	0.0164845	-25.7576
N/A	NC_042493.1	126481162	+	1.07615e-05	0.0412508	-25.78
ATP-dependent RNA helicase p62-like	NC_042496.1	5253899	-	3.82459e-06	0.0255403	-25.7802
nuclear hormone receptor FTZ-F1-like	NC_042494.1	126208561	-	2.03184e-06	0.0194469	-25.8065
transformation/transcription domain-associated protein-like	NC_042494.1	112507471	-	1.64775e-05	0.0497259	-25.8621
uncharacterized LOC100162602	NC_042494.1	70023729	+	6.37783e-06	0.0324392	-25.91
N/A	NC_042493.1	106927267	+	1.01756e-06	0.0133677	-25.9259
# sodium/hydrogen exchanger 9B2 & uncharacterized LOC100571428	NC_042494.1	58944493	+	2.65514e-06	0.0218567	-25.9259
uncharacterized LOC100571832	NC_042496.1	8344651	+	5.49841e-06	0.0305769	-25.9259
# legumain & uncharacterized LOC100571675	NC_042493.1	4016218	+	2.45785e-06	0.0211326	-25.9349
tankyrase-1-like	NC_042494.1	14308855	+	1.69157e-08	0.00159716	-25.974
N/A	NC_042495.1	22883711	-	7.85989e-06	0.0360978	-26
uncharacterized LOC100569497	NW_021770497.1	620	+	4.94429e-07	0.00913544	-26.004
N/A	NC_042494.1	92083146	+	1.76459e-06	0.0183183	-26.0069
LOC103307762	NC_042496.1	22141866	+	3.80728e-10	0.000185161	-26.0555
probable saccharopine dehydrogenase-like	NC_042493.1	82777310	-	2.02977e-06	0.0194469	-26.087
uncharacterized LOC100162043	NC_042494.1	160484722	-	1.58659e-05	0.0488777	-26.1211
uncharacterized LOC100161941	NC_042494.1	91253163	-	6.65769e-06	0.0332574	-26.1905
ribose-5-phosphate isomerase-like	NC_042496.1	25429588	+	1.45538e-05	0.0467628	-26.1905
N/A	NW_021771320.1	3164	-	1.45538e-05	0.0467628	-26.1905
uncharacterized LOC100161093	NC_042494.1	97679009	-	1.39697e-05	0.0460478	-26.2092
LOC115034047	NC_042495.1	102051013	-	9.75636e-06	0.0394957	-26.2103
N/A	NC_042494.1	99544974	-	1.62232e-05	0.0494617	-26.2338
N/A	NC_042493.1	8819059	-	1.55729e-06	0.0171142	-26.3158
uncharacterized LOC100568751	NC_042493.1	121588749	-	1.31517e-05	0.0448915	-26.3158
probable peroxisomal acyl-coenzyme A oxidase 1-like	NC_042495.1	63743276	-	6.21007e-06	0.0322468	-26.3158
coiled-coil domain-containing protein 93-like	NC_042495.1	88209798	-	4.10496e-06	0.0263757	-26.3158
syntaxin 1A	NC_042495.1	93410586	-	8.12128e-06	0.0365178	-26.3158
ubiquitin conjugation factor E4 B-like	NC_042494.1	118785713	-	1.25281e-05	0.0440023	-26.3706
N/A	NC_042493.1	91692111	+	1.00839e-05	0.0400284	-26.3736
ABC transporter G family member 23-like	NC_042493.1	46275459	+	1.27354e-06	0.0153177	-26.4151
uncharacterized LOC100167708	NC_042495.1	25509047	-	1.39698e-05	0.0460478	-26.4151
N/A	NC_042495.1	106230317	+	1.39698e-05	0.0460478	-26.4151
N/A	NC_042496.1	27925942	+	2.36865e-07	0.00638112	-26.4151
LOC107882182	NC_042493.1	68542499	-	7.87239e-06	0.0361233	-26.419
N/A	NC_042493.1	40652298	-	8.59174e-06	0.037292	-26.4706
uncharacterized LOC100168141	NC_042495.1	87844386	+	4.74862e-07	0.00901812	-26.4706
N/A	NC_042496.1	19118993	-	6.52029e-07	0.0107278	-26.4706
N/A	NW_021770132.1	31742	+	2.00557e-06	0.0193738	-26.4706
octopamine receptor beta-3R-like	NC_042495.1	67492369	-	3.7211e-06	0.0252752	-26.5306
N/A	NW_021769887.1	9623	-	2.14462e-06	0.0198591	-26.5306
N/A	NW_021772203.1	12503	+	1.41142e-05	0.0462974	-26.5306
N/A	NC_042495.1	9615031	-	4.90114e-06	0.0288182	-26.5377
uncharacterized LOC100569692	NC_042494.1	48582669	+	5.60368e-06	0.0308517	-26.5625
chorion peroxidase-like	NC_042494.1	64755032	-	4.2337e-06	0.0267695	-26.6445
N/A	NC_042493.1	52920584	-	4.37094e-06	0.0271769	-26.6562
N/A	NC_042493.1	131061631	+	6.24015e-06	0.0322749	-26.6667
N/A	NC_042494.1	7988007	-	5.20344e-07	0.00934107	-26.6667
uncharacterized LOC100164223	NC_042494.1	58456422	-	1.09814e-05	0.0416513	-26.6667
# actin-histidine N-methyltransferase & probable serine/threonine-protein kinase nek3	NC_042494.1	104407180	+	4.15358e-06	0.0265106	-26.6667
N/A	NW_021769981.1	9288	-	2.17032e-06	0.0199605	-26.6667
# Polr2h & WD repeat-containing protein 76	NC_042494.1	154356418	+	1.46635e-05	0.0469616	-26.7532
LOC103310131	NC_042495.1	3825946	-	3.8787e-06	0.0256895	-26.7606
ATP-binding cassette sub-family D member 2-like	NC_042494.1	127689124	+	1.45197e-05	0.0467502	-26.7857
N/A	NW_021771472.1	3618	+	4.58883e-06	0.0279661	-26.8
potassium voltage-gated channel protein Shal-like	NC_042493.1	82521449	+	2.95195e-06	0.0227962	-26.8293
N/A	NC_042494.1	143172828	-	4.82601e-06	0.0286409	-26.8293
N/A	NW_021770793.1	278	+	5.4762e-06	0.0305248	-26.8293
dosage compensation regulator-like	NC_042493.1	105298799	-	1.28923e-05	0.0445727	-26.8834
5'-3' exoribonuclease 1-like	NC_042495.1	585209	+	2.49749e-06	0.0213089	-26.9766
N/A	NC_042493.1	102916757	-	1.38271e-05	0.0458487	-27.0246
N/A	NW_021770820.1	98462	+	9.50333e-06	0.0390556	-27.027
LOC103310924	NC_042495.1	104754205	+	4.45208e-07	0.00879831	-27.033
N/A	NC_042495.1	74637797	+	2.70871e-06	0.0219139	-27.0559
intraflagellar transport protein 57 homolog	NC_042495.1	78664481	-	1.15558e-05	0.0425873	-27.0655
macoilin-like	NC_042494.1	43193175	-	3.12478e-07	0.00733739	-27.0763
COP9 signalosome complex subunit 1b-like	NW_021770943.1	5711	+	6.15174e-06	0.032077	-27.1302
N/A	NC_042495.1	28182762	-	3.44473e-07	0.00778478	-27.1429
N/A	NC_042493.1	38828711	+	3.96186e-06	0.0258749	-27.163
pumilio homolog 2-like	NC_042494.1	141460118	+	8.78556e-06	0.0376594	-27.2333
transport protein SEC22-like	NC_042496.1	33643527	+	1.04693e-05	0.0406875	-27.2465
protein cereblon-like	NC_042495.1	16879744	+	4.02203e-06	0.0260932	-27.2511
N/A	NC_042494.1	21522893	+	7.63327e-06	0.0356314	-27.2589
N/A	NC_042493.1	21437810	+	1.21888e-06	0.0150251	-27.2727
derlin-2-like	NC_042495.1	76738719	+	2.29936e-06	0.0203256	-27.2727
zinc finger protein 611-like	NC_042496.1	8449649	-	6.53129e-07	0.0107284	-27.2727
N/A	NC_042496.1	27487257	-	2.29936e-06	0.0203256	-27.2727
N/A	NW_021764322.1	1728	+	1.0203e-05	0.0402648	-27.2799
LOC107884128	NC_042495.1	21825626	+	6.45321e-06	0.0325906	-27.3396
putative nuclease HARBI1-like	NC_042494.1	53710762	-	5.6681e-06	0.0309219	-27.3821
syntaxin 1A	NC_042495.1	93414404	+	4.97174e-06	0.0290911	-27.4123
N/A	NC_042493.1	130851483	-	3.5947e-07	0.00793434	-27.4158
LOC115033196	NC_042493.1	103141934	+	4.14007e-06	0.0264747	-27.4194
heterogeneous nuclear ribonucleoprotein L-like	NC_042495.1	52096970	-	1.87993e-07	0.00580347	-27.4194
N/A	NC_042493.1	57893386	+	2.08297e-06	0.0195969	-27.451
N/A	NC_042493.1	114328480	-	1.41229e-05	0.0462974	-27.451
protein cornichon homolog 4-like	NC_042494.1	38710642	-	6.15909e-06	0.0320781	-27.451
uncharacterized LOC100160852	NC_042494.1	100783295	+	3.87373e-07	0.00822208	-27.451
N/A	NC_042493.1	104529141	+	8.15013e-07	0.0118741	-27.4675
N/A	NC_042493.1	30638467	+	2.38742e-07	0.00638112	-27.4716
uncharacterized LOC100167340	NC_042494.1	78252089	+	5.79619e-06	0.0312236	-27.5
stearoyl-coa desaturase-like	NC_042495.1	71626347	+	8.66247e-06	0.0373884	-27.5
LOC115034312	NC_042495.1	5927013	-	6.52097e-07	0.0107278	-27.5862
ras-related protein Rab-43-like	NC_042494.1	138474911	-	9.54245e-06	0.0390903	-27.6565
protein turtle-like	NC_042494.1	12543147	-	1.62541e-05	0.0494617	-27.6596
N/A	NC_042494.1	150906247	+	4.604e-06	0.027983	-27.6596
N/A	NC_042495.1	50995424	+	1.43347e-06	0.016437	-27.6694
LOC103308126	NW_021771112.1	17195	+	8.53785e-06	0.0372066	-27.7007
uncharacterized LOC100168575	NC_042493.1	66569904	-	3.38716e-07	0.00771909	-27.7108
ATP-dependent RNA helicase DDX19A-like	NC_042493.1	96794563	-	1.63756e-05	0.0495982	-27.7622
calreticulin-like	NC_042493.1	95002359	+	6.0826e-06	0.0319365	-27.7706
N/A	NC_042493.1	91366277	-	2.97351e-06	0.0228498	-27.7778
N/A	NW_021770462.1	26778	+	4.46487e-06	0.0275282	-27.7778
ribonucleoside-diphosphate reductase small chain-like	NC_042495.1	19357683	+	1.58342e-05	0.0488777	-27.8507
N/A	NC_042493.1	104530325	+	3.03407e-06	0.0229034	-27.859
uncharacterized LOC100575022	NC_042493.1	21487153	-	2.16848e-06	0.0199605	-27.8632
uncharacterized LOC100159246	NW_021770139.1	48290	-	1.6206e-05	0.0494303	-27.907
uncharacterized LOC100164427	NC_042496.1	28586138	+	4.01377e-06	0.0260796	-27.9412
LOC100159824	NC_042495.1	1185705	+	2.73094e-06	0.0219793	-27.9625
N/A	NC_042495.1	19375652	-	8.69815e-06	0.0374532	-27.9695
N/A	NC_042493.1	80521401	-	1.32703e-05	0.0450503	-27.9727
LOC103309845	NC_042493.1	70512004	-	7.75924e-06	0.0359142	-27.9813
LOC107884790	NC_042493.1	130687066	+	1.19354e-05	0.0430807	-28
ADP-ribosylation factor-binding protein GGA1-like	NC_042495.1	114617635	+	8.43116e-06	0.0370208	-28.007
heterogeneous nuclear ribonucleoprotein L-like	NC_042493.1	76757102	+	9.55351e-06	0.0390903	-28.0388
uncharacterized LOC100571902	NC_042493.1	21285886	-	2.34618e-06	0.0205607	-28.0702
N/A	NC_042494.1	134768256	+	1.17822e-05	0.0427992	-28.0702
LOC103308028	NC_042493.1	104446044	-	1.00209e-05	0.0399688	-28.1281
N/A	NC_042493.1	108040986	+	8.07412e-06	0.0364628	-28.1516
uncharacterized LOC100575112	NC_042493.1	131047892	-	8.91814e-06	0.0378283	-28.1702
coiled-coil domain-containing protein 132-like	NC_042495.1	42364860	+	4.31255e-06	0.0269687	-28.1852
N/A	NC_042494.1	60436805	+	6.72607e-07	0.0109359	-28.2051
N/A	NC_042495.1	24964173	-	6.39282e-06	0.0324738	-28.2345
tyrosine-protein kinase Btk29A-like	NC_042494.1	81483153	-	1.81877e-06	0.018447	-28.2609
uncharacterized LOC100572622	NC_042493.1	16605053	-	2.72159e-06	0.0219366	-28.2621
e3 ubiquitin-protein ligase HERC2-like	NC_042495.1	45645600	+	1.52219e-05	0.0478718	-28.2764
enolase-like	NC_042495.1	88316669	+	1.54182e-05	0.0482284	-28.3154
ring canal kelch protein-like	NC_042494.1	16703348	-	1.38179e-07	0.00475771	-28.345
uncharacterized LOC100167279	NC_042494.1	141698672	+	2.60605e-06	0.0216835	-28.3582
# TNF receptor-associated factor 3 & RNA-binding protein cabeza	NC_042496.1	41149796	+	3.85478e-06	0.0256627	-28.3582
LOC107882617	NC_042493.1	97849250	-	1.29716e-06	0.0154455	-28.3753
transcription elongation factor SPT6-like	NC_042495.1	46608638	+	1.06773e-05	0.0411465	-28.4382
origin recognition complex subunit 4-like	NC_042495.1	52705800	+	1.65857e-05	0.0498685	-28.4448
probable cleavage and polyadenylation specificity factor subunit 2-like	NC_042495.1	16745817	+	3.55737e-06	0.0247481	-28.4689
protein retinal degeneration B-like	NC_042495.1	97026967	-	3.51719e-07	0.00785015	-28.4727
uncharacterized LOC100160178	NC_042493.1	57930632	-	7.40299e-06	0.0352149	-28.5417
N/A	NC_042493.1	67724583	+	3.73867e-06	0.025298	-28.5486
uncharacterized LOC100571902	NC_042493.1	21288567	-	1.32632e-06	0.0155926	-28.5714
N/A	NC_042493.1	120751011	-	1.34317e-07	0.00470128	-28.5714
LOC100306981	NC_042494.1	49775934	+	1.96168e-07	0.00588227	-28.5714
uncharacterized LOC100569870	NC_042496.1	15910020	+	1.20732e-05	0.0433182	-28.5854
N/A	NC_042495.1	55269682	+	1.07755e-05	0.041275	-28.6458
N/A	NC_042494.1	20789069	+	1.98154e-07	0.00588272	-28.7091
LOC115033366	NC_042493.1	111829167	-	1.48121e-05	0.0471942	-28.7665
N/A	NC_042493.1	102642981	-	3.68659e-06	0.0251548	-28.8136
N/A	NC_042494.1	84498643	-	2.46522e-06	0.0211374	-28.8392
N/A	NC_042496.1	24448436	+	6.31284e-06	0.0322809	-28.8462
high-affinity copper uptake protein-like	NC_042495.1	8076284	-	8.10355e-06	0.0365178	-28.8889
N/A	NC_042495.1	95064890	-	7.31599e-07	0.0112493	-28.8889
LOC107885578	NC_042493.1	106961205	-	1.50701e-05	0.0475882	-28.9514
LOC107882242	NC_042495.1	22052638	-	5.44563e-06	0.0304267	-28.9729
bifunctional aminoacyl-tRNA synthetase-like	NC_042493.1	28407967	-	8.65218e-06	0.0373738	-28.9985
N/A	NC_042493.1	94822246	+	1.99916e-06	0.0193738	-29.0058
N/A	NC_042495.1	21957130	-	1.64416e-05	0.0496823	-29.0426
LOC107883465	NC_042495.1	18153876	+	7.92266e-06	0.0362476	-29.0578
intraflagellar transport protein 122 homolog	NC_042494.1	85726032	-	7.50676e-07	0.011432	-29.0592
N/A	NC_042494.1	90602238	+	2.18368e-06	0.020006	-29.0743
N/A	NC_042495.1	85172773	+	7.76721e-06	0.0359142	-29.0785
poly [ADP-ribose] polymerase 12-like	NC_042495.1	94188388	+	4.15709e-06	0.0265174	-29.0818
LOC103310744	NC_042493.1	14674214	+	5.82663e-06	0.0312705	-29.0909
uncharacterized LOC100570992	NC_042495.1	65602989	-	3.90374e-06	0.0257403	-29.108
LOC107882722	NC_042493.1	30665195	-	1.01016e-06	0.0133121	-29.1101
LOC103311964	NC_042494.1	20674023	+	1.00086e-05	0.0399444	-29.1114
N/A	NC_042494.1	84621331	+	4.7564e-06	0.0283991	-29.1331
uncharacterized LOC100167305	NC_042494.1	43857685	-	2.99734e-07	0.00718857	-29.1667
short-chain dehydrogenase-like	NC_042494.1	84188036	-	1.00008e-05	0.0399444	-29.1667
uncharacterized LOC100575904	NC_042495.1	64576035	+	5.90194e-06	0.0316052	-29.1667
uncharacterized LOC100159378	NC_042494.1	28566776	+	8.73219e-07	0.0124281	-29.2027
protein piwi-like	NC_042493.1	119303078	-	1.10405e-07	0.00414935	-29.2125
rho guanine nucleotide exchange factor 11-like	NC_042493.1	76141296	-	3.95583e-06	0.0258749	-29.2142
N/A	NC_042493.1	103876885	-	1.99641e-06	0.0193738	-29.2154
N/A	NC_042495.1	17271912	-	7.99093e-06	0.036345	-29.2245
N/A	NC_042494.1	23927221	+	3.22959e-06	0.0236856	-29.2683
cysteine string protein	NC_042495.1	78269999	+	1.12517e-05	0.0421867	-29.2782
LOC107882661	NC_042493.1	116345895	+	8.73708e-07	0.0124281	-29.3211
LOC107884722	NC_042495.1	18013288	+	5.23402e-06	0.0298512	-29.3333
60S ribosomal protein L26-like	NC_042494.1	108569873	+	1.50208e-05	0.0475294	-29.3632
N/A	NW_021771002.1	21765	+	7.9906e-07	0.011797	-29.373
LOC107883606	NC_042493.1	114552168	+	9.55177e-06	0.0390903	-29.387
N/A	NC_042493.1	128474736	-	6.80492e-06	0.0336358	-29.398
mini-chromosome maintenance complex-binding protein-like	NC_042495.1	56135665	-	2.08372e-06	0.0195969	-29.4118
N/A	NC_042493.1	118871584	-	6.33547e-06	0.0323342	-29.4118
LOC107882167	NC_042493.1	111422804	-	4.6814e-06	0.0281844	-29.4129
N/A	NC_042493.1	112935263	+	1.09239e-05	0.0415786	-29.4318
dosage compensation regulator-like	NC_042493.1	105312267	+	3.05687e-06	0.0230113	-29.4406
N/A	NC_042493.1	115276447	-	1.04402e-05	0.0406231	-29.4451
N/A	NC_042495.1	21789845	+	9.33858e-06	0.0387314	-29.4643
aldehyde dehydrogenase, mitochondrial-like	NC_042495.1	105216083	+	6.27806e-06	0.0322809	-29.4792
N/A	NC_042496.1	38666343	+	1.48638e-05	0.0472677	-29.4908
uncharacterized LOC100159350	NC_042494.1	67252940	+	8.55604e-06	0.037211	-29.5015
DEP domain-containing protein 1A-like	NC_042493.1	29559331	-	4.46559e-06	0.0275282	-29.5082
N/A	NC_042495.1	58160517	-	4.57543e-07	0.00891822	-29.5082
N/A	NC_042493.1	105990211	-	1.42703e-05	0.0464808	-29.5381
DNA topoisomerase 1-like	NC_042494.1	10702808	+	8.05486e-06	0.0364214	-29.5673
uncharacterized LOC100572700	NC_042494.1	167396416	-	2.56826e-06	0.0215179	-29.571
dynactin subunit 1-like	NC_042495.1	106252285	-	9.12288e-06	0.0383007	-29.5866
LOC103308412	NC_042493.1	47542692	-	6.10259e-06	0.0319664	-29.5963
NSFL1 cofactor p47-like	NC_042494.1	59739850	-	1.46907e-05	0.0470252	-29.6278
cell division cycle 20	NC_042495.1	113274218	+	8.76294e-06	0.0375972	-29.6296
uncharacterized LOC100573190	NC_042495.1	16812295	-	5.9833e-06	0.0318589	-29.6382
LOC103310924	NC_042495.1	104754082	-	8.13782e-06	0.0365675	-29.6409
N/A	NC_042493.1	35479625	-	1.00686e-07	0.00396334	-29.6875
uncharacterized LOC100160817	NC_042495.1	14926275	-	3.10319e-06	0.0231562	-29.6875
N/A	NC_042493.1	96173610	+	5.26781e-06	0.0299847	-29.6958
ribonucleoside-diphosphate reductase small chain-like	NC_042495.1	19360341	-	1.50067e-05	0.0475266	-29.7109
LOC107882430	NC_042493.1	17982581	+	7.89049e-06	0.0361463	-29.746
N/A	NW_021770688.1	6366	+	5.80969e-06	0.0312251	-29.7872
LOC115034937	NW_021771067.1	12739	-	2.49409e-07	0.00653423	-29.7872
chromobox protein homolog 5-like	NC_042493.1	120833171	-	3.79213e-06	0.0254491	-29.7938
uncharacterized LOC100161573	NC_042495.1	102822483	+	7.47148e-06	0.0352966	-29.8246
structural maintenance of chromosomes protein 5-like	NC_042494.1	117002063	-	1.01142e-06	0.0133121	-29.8345
LOC103308727	NC_042495.1	20135372	-	7.5326e-07	0.0114522	-29.8364
mothers against decapentaplegic homolog 4-like	NC_042493.1	124307990	+	1.66189e-05	0.0499299	-29.8891
N/A	NC_042493.1	131217061	+	2.56303e-06	0.0215073	-29.8983
N/A	NC_042493.1	91692120	+	1.9612e-06	0.0191087	-29.9051
N/A	NC_042493.1	132096894	+	1.12627e-05	0.0421867	-29.9435
LOC107882527	NC_042495.1	53147301	-	4.66967e-06	0.0281765	-29.9444
N/A	NW_021771101.1	1212	+	5.71668e-07	0.00983968	-29.9702
N/A	NC_042493.1	66555295	-	8.96537e-06	0.0379098	-30
LOC103310561	NC_042493.1	126848320	-	3.00673e-06	0.0228498	-30
uncharacterized LOC100167539	NC_042494.1	75762968	+	3.00673e-06	0.0228498	-30
ring canal kelch homolog	NW_021759919.1	469	+	1.26829e-06	0.0153176	-30
N/A	NC_042493.1	93789945	-	8.95316e-06	0.0379098	-30.0102
N/A	NC_042493.1	104529206	+	1.11622e-06	0.0142245	-30.0271
g2/M phase-specific E3 ubiquitin-protein ligase-like	NC_042493.1	131977167	-	1.21021e-05	0.0433786	-30.0281
N/A	NC_042495.1	104737501	+	1.16014e-05	0.0426456	-30.0349
kelch-like protein 2-like	NC_042494.1	21852867	-	4.92271e-07	0.00913544	-30.0437
low-density lipoprotein receptor-related protein 2-like	NC_042494.1	27117837	-	1.58486e-06	0.0173117	-30.0546
ring canal kelch homolog	NC_042493.1	117551047	-	1.41929e-05	0.0463038	-30.0595
N/A	NC_042493.1	109725435	-	1.02934e-05	0.0404044	-30.063
uncharacterized LOC100569195	NC_042495.1	8361632	+	7.10955e-06	0.0343572	-30.068
probable ATP-dependent RNA helicase spindle-E-like	NC_042496.1	9489631	-	5.41985e-06	0.0303514	-30.12
structural maintenance of chromosomes protein 5-like	NC_042494.1	117002040	-	2.76928e-07	0.00692017	-30.155
annexin-B9-like	NC_042493.1	98218224	+	4.90015e-06	0.0288182	-30.1788
LOC107883640	NC_042493.1	2582639	-	4.09292e-06	0.0263757	-30.1887
kelch-like protein 3-like	NW_021771438.1	86209	+	4.96738e-06	0.0290813	-30.1887
uncharacterized LOC100165903	NC_042494.1	19998430	+	7.93701e-06	0.0362612	-30.2034
poly [ADP-ribose] polymerase 12-like	NC_042495.1	94189344	-	9.44816e-06	0.038933	-30.2036
LOC115034741	NW_021770363.1	65118	+	6.0036e-06	0.0318589	-30.2236
N/A	NC_042494.1	169428106	-	5.44216e-06	0.0304267	-30.2326
kelch-like protein 3-like	NW_021771438.1	84119	-	3.10326e-07	0.00730271	-30.2484
uncharacterized LOC100573418	NC_042493.1	62749259	-	3.94355e-06	0.0258749	-30.3247
N/A	NC_042493.1	54179053	+	1.04717e-05	0.0406875	-30.3533
LOC103309783	NC_042493.1	111847020	-	1.03852e-05	0.040424	-30.4198
N/A	NC_042493.1	97419531	+	2.2881e-07	0.00636721	-30.4348
v-type proton ATPase 116 kDa subunit a isoform 1-like	NC_042494.1	70552447	-	8.91114e-06	0.0378283	-30.4348
possible pseudogene or miscRNA, No KEGG entry	NC_042495.1	38278388	-	3.99684e-06	0.0260164	-30.4348
presequence protease, mitochondrial-like	NC_042495.1	93032355	-	1.72566e-06	0.0181961	-30.4348
dedicator of cytokinesis protein 3-like	NC_042494.1	129069266	+	2.14155e-06	0.0198582	-30.4505
N/A	NC_042494.1	147856323	-	8.03284e-06	0.0363522	-30.4723
N/A	NC_042493.1	131067137	-	8.56156e-07	0.0122752	-30.4762
LOC107883621	NC_042495.1	106594904	+	1.15204e-05	0.0425326	-30.4969
N/A	NC_042493.1	106040404	-	4.85703e-06	0.0286991	-30.5085
anaphase-promoting complex subunit 10-like	NC_042494.1	142772860	+	4.71839e-08	0.00257521	-30.5085
LOC103310131	NC_042495.1	3817723	-	2.12263e-06	0.0197639	-30.5085
LOC107883051	NW_021770581.1	3999	-	5.99485e-06	0.0318589	-30.5243
signal recognition particle receptor subunit alpha homolog	NC_042496.1	36870316	+	1.32461e-05	0.0450219	-30.5437
uncharacterized LOC100570253	NC_042496.1	22129315	-	4.65238e-06	0.028139	-30.5505
uncharacterized LOC100164106	NC_042495.1	3876743	-	2.77657e-06	0.022127	-30.5749
phospholipase A-2-activating protein-like	NC_042494.1	153030439	-	3.2251e-06	0.0236856	-30.5936
RabX4-like	NC_042494.1	99993741	+	2.66874e-06	0.0218645	-30.6042
uncharacterized LOC100159627	NC_042494.1	105268545	-	3.61817e-06	0.0249149	-30.6122
uncharacterized LOC100168926	NC_042493.1	73656621	+	1.90584e-06	0.0187874	-30.617
ADP-ribosylation factor-like protein	NC_042495.1	58978653	-	6.03628e-07	0.0102097	-30.6306
dynactin subunit 1-like	NC_042495.1	106254472	+	1.0112e-06	0.0133121	-30.6378
N/A	NC_042496.1	20701932	-	6.898e-06	0.0338026	-30.6419
ring canal kelch homolog	NC_042494.1	131005829	-	1.51725e-05	0.0477583	-30.6481
neogenin-like	NC_042493.1	38376443	+	1.18667e-05	0.0429767	-30.6515
uncharacterized LOC100570789	NC_042493.1	63126845	-	9.59672e-07	0.0130017	-30.6838
# legumain & putative uncharacterized protein DDB_G0282499	NC_042493.1	3995172	+	1.03776e-05	0.0404233	-30.7097
uncharacterized LOC100572589	NC_042493.1	99310372	-	1.03776e-05	0.0404233	-30.7097
LOC107885259	NW_021771981.1	17642	-	8.45081e-06	0.0370211	-30.7851
glyceraldehyde-3-phosphate dehydrogenase 2-like	NW_021770341.1	19347	+	3.80643e-06	0.0254818	-30.7913
mps one binder kinase activator-like 2-like	NC_042493.1	18290480	-	2.56009e-06	0.0215073	-30.7963
N/A	NC_042494.1	84498634	-	2.14115e-07	0.00614792	-30.8088
UPF0466 protein AAEL003858, mitochondrial-like	NC_042495.1	76932096	+	1.17673e-05	0.0427726	-30.859
RNA polymerase-associated protein CTR9 homolog	NC_042494.1	20702149	-	5.03316e-06	0.0292815	-30.875
LOC107883716	NC_042496.1	35094024	-	1.38975e-05	0.045993	-30.8764
uncharacterized LOC100167748	NC_042495.1	61876756	+	1.20627e-05	0.0433093	-30.8965
LOC107884652	NC_042496.1	28405780	+	3.79034e-06	0.0254491	-30.8987
basement membrane-specific heparan sulfate proteoglycan core protein-like	NC_042495.1	97444081	-	9.21153e-06	0.0383832	-30.9091
uncharacterized LOC100570267	NC_042494.1	68538829	-	4.15647e-09	0.000681717	-30.9237
DNA polymerase epsilon catalytic subunit A-like	NC_042496.1	36652715	+	2.54057e-06	0.0214484	-30.9404
UPF0454 protein C12orf49 homolog	NC_042494.1	111840998	+	2.07271e-06	0.0195447	-30.949
LOC107883664	NC_042493.1	105876686	+	6.93581e-06	0.0339418	-30.974
N/A	NC_042493.1	131068771	+	9.96096e-06	0.0399146	-30.974
LOC103307712	NC_042495.1	17706512	-	6.02827e-06	0.0318862	-30.9876
N/A	NC_042493.1	99483217	-	1.24589e-05	0.0439002	-31.029
carboxypeptidase D-like	NC_042495.1	11369877	+	1.47498e-06	0.0166208	-31.0345
60S ribosomal protein L5-like	NC_042495.1	93107311	-	9.85535e-06	0.0397478	-31.0345
# uncharacterized LOC107884234 & uncharacterized LOC115034901	NW_021770948.1	5713	-	3.24916e-07	0.00750774	-31.0498
N/A	NC_042493.1	111342537	-	1.44434e-05	0.0466674	-31.1111
N/A	NC_042493.1	106687553	-	6.6722e-06	0.0333102	-31.1475
N/A	NC_042495.1	87566074	-	1.15533e-05	0.0425873	-31.18
uncharacterized LOC100570253	NC_042496.1	22126553	-	6.85742e-06	0.0337397	-31.1946
LOC103310182	NC_042494.1	37201815	+	5.91955e-07	0.0100752	-31.2038
octopamine receptor 1-like	NC_042495.1	108692820	-	1.02437e-05	0.0403077	-31.2264
uncharacterized LOC100161424	NC_042494.1	50294266	-	1.19002e-05	0.0430355	-31.2354
heat shock 70 kDa protein 14-like	NC_042495.1	78013663	-	1.27549e-05	0.0442688	-31.2381
LOC107882142	NC_042494.1	92900895	+	1.4538e-05	0.0467628	-31.25
uncharacterized LOC100165690	NC_042495.1	23042774	-	1.82918e-06	0.018447	-31.3125
N/A	NC_042493.1	127280894	-	9.58734e-06	0.0391529	-31.3333
DNA repair and recombination protein RAD54B-like	NC_042495.1	74852125	-	1.35211e-05	0.0453944	-31.3417
zinc finger SWIM domain-containing protein 3-like	NC_042494.1	149289179	+	3.68971e-07	0.00795921	-31.3725
LOC100168088	NC_042495.1	97150633	-	4.39114e-07	0.00879831	-31.3725
chitinase-3-like protein 2-like	NC_042496.1	5971758	+	1.66111e-05	0.0499203	-31.4537
N/A	NC_042493.1	35024936	-	7.53221e-06	0.0353766	-31.4708
N/A	NC_042495.1	49869780	+	1.63664e-05	0.0495843	-31.5205
N/A	NW_021774501.1	286	+	9.5356e-06	0.0390903	-31.5488
N/A	NC_042493.1	124241879	+	2.92206e-07	0.00712003	-31.5789
LOC103310171	NC_042495.1	17079282	-	6.79102e-07	0.0109828	-31.5789
eukaryotic translation initiation factor 3 subunit C-like	NC_042495.1	55993322	+	2.57388e-06	0.0215457	-31.5789
probable glutamine-dependent NAD(+) synthetase-like	NC_042495.1	100690360	-	2.2377e-06	0.0200996	-31.5789
cathepsin K-1	NC_042493.1	87265971	+	2.25625e-06	0.0202015	-31.5873
uncharacterized LOC100166981	NC_042495.1	85914665	-	1.08362e-05	0.0413666	-31.5873
3-hydroxyacyl-CoA dehydrogenase type-2-like	NC_042494.1	157963471	-	1.63533e-05	0.0495791	-31.601
N/A	NC_042493.1	60952627	+	3.16076e-06	0.0234188	-31.6017
uncharacterized LOC100166566	NC_042494.1	117755517	+	3.74697e-06	0.0253187	-31.6434
uncharacterized LOC100575168	NC_042493.1	34760578	+	1.36371e-05	0.0455097	-31.652
N/A	NC_042493.1	120750759	-	3.0335e-06	0.0229034	-31.711
N/A	NC_042493.1	132128697	-	3.66511e-07	0.00795921	-31.7143
exportin-5-like	NC_042495.1	18952343	-	7.55257e-07	0.0114664	-31.7204
chromobox protein homolog 5-like	NC_042493.1	120831680	-	4.72814e-07	0.00901812	-31.7328
LOC100162890	NC_042494.1	59789903	-	9.62197e-06	0.0391529	-31.7547
histone-arginine methyltransferase CARMER-like	NC_042493.1	67788698	-	1.37961e-05	0.0457821	-31.8167
DET1 homolog	NC_042493.1	97195781	+	4.93871e-06	0.0289448	-31.828
exocyst complex component sec3-like	NC_042495.1	96226722	-	3.75691e-07	0.00804555	-31.8394
sorting nexin-4-like	NC_042494.1	13058939	-	9.61833e-07	0.0130147	-31.8452
N/A	NW_021770374.1	1284440	+	1.22118e-05	0.0435701	-31.87
uncharacterized LOC100302379	NC_042493.1	56124140	+	1.21975e-05	0.0435333	-31.9156
e3 ubiquitin-protein ligase Topors-like	NC_042493.1	114811838	-	5.19044e-06	0.029705	-31.9378
phosphatidylinositol 3-kinase regulatory subunit beta-like	NC_042495.1	106119263	+	9.24937e-07	0.0127867	-31.9444
# uncharacterized LOC103307712 & uncharacterized LOC107883430 & uncharacterized LOC107883432	NC_042495.1	17717101	+	3.02959e-06	0.0229034	-31.9468
uncharacterized LOC100168714	NC_042493.1	34696669	-	2.73331e-09	0.000519084	-32
protein son of sevenless-like	NC_042493.1	76677059	+	1.45461e-05	0.0467628	-32.016
uncharacterized LOC100160238	NC_042495.1	85574528	-	2.40246e-06	0.0207885	-32.0418
coiled-coil domain containing 47	NC_042495.1	52037447	-	2.53434e-06	0.0214328	-32.0829
zinc finger protein 567-like	NC_042494.1	147294895	+	2.63541e-08	0.00203772	-32.0837
LOC103308359	NC_042493.1	122092255	-	5.20283e-07	0.00934107	-32.0863
N/A	NC_042495.1	55810243	+	6.64239e-08	0.00308597	-32.1429
coronin-1C-like	NC_042495.1	92702721	+	7.16603e-06	0.0345222	-32.2194
LOC107885578	NC_042493.1	106959960	+	1.29127e-05	0.0446147	-32.2264
ring canal kelch homolog	NC_042493.1	117548663	-	3.64499e-06	0.0250278	-32.2353
# transcription factor SPT20 homolog & uncharacterized LOC100572098	NC_042494.1	108732522	-	2.8685e-06	0.0224521	-32.245
uncharacterized LOC100574823	NC_042493.1	66472356	+	1.41918e-05	0.0463038	-32.2581
uncharacterized LOC100573415	NC_042493.1	110290006	+	3.85994e-06	0.0256673	-32.265
LOC100168902	NC_042495.1	111072416	+	1.22284e-06	0.0150251	-32.2755
N/A	NC_042493.1	104352541	-	3.08168e-06	0.0231177	-32.3375
CDK5 and ABL1 enzyme substrate 1-like	NC_042493.1	52902352	-	7.34758e-06	0.0350846	-32.3913
uncharacterized LOC100163299	NC_042494.1	26252397	+	1.53009e-05	0.0480365	-32.3966
N/A	NC_042493.1	108057877	-	9.34591e-06	0.038747	-32.4058
uncharacterized LOC100164694	NC_042495.1	52759897	+	2.46478e-06	0.0211374	-32.4074
staphylococcal nuclease domain-containing protein 1-like	NC_042493.1	104903424	+	6.95068e-06	0.0339685	-32.4088
CG4239-like	NC_042494.1	45386453	+	1.08197e-05	0.0413466	-32.4094
translation initiation factor eIF-2B subunit delta-like	NC_042495.1	84590882	-	8.7922e-06	0.0376594	-32.4191
LOC103307630	NC_042493.1	25479136	-	9.91572e-06	0.0398355	-32.4257
serine/threonine-protein kinase mTOR-like	NC_042494.1	122116653	+	9.9129e-06	0.0398355	-32.4263
# Vta1 & Tmem35	NC_042494.1	122276806	-	1.44767e-05	0.0466674	-32.4474
uncharacterized LOC100570447	NC_042496.1	22131472	-	7.17819e-07	0.0112288	-32.4555
e3 ubiquitin-protein ligase NEDD4-like	NC_042495.1	51409733	+	1.11043e-05	0.0418535	-32.4661
probable ATP-dependent RNA helicase DDX46-like	NC_042496.1	34890434	-	7.511e-06	0.0353639	-32.4877
regulator of nonsense transcripts 1-like	NC_042493.1	115285124	-	1.64351e-05	0.0496823	-32.4878
N/A	NC_042493.1	67945559	+	1.51257e-05	0.0476913	-32.4953
ubiquitin-conjugating enzyme E2 O-like	NC_042493.1	114454162	+	5.77825e-06	0.0312236	-32.5
nuclear pore complex protein Nup205-like	NC_042493.1	119348734	+	2.05463e-06	0.0195447	-32.5123
furin-like protease 1, isoform 1-CRR-like	NC_042495.1	114899386	-	1.34999e-05	0.0453882	-32.5384
ring canal kelch homolog	NC_042494.1	131003951	+	5.20986e-06	0.0297762	-32.5517
N/A	NC_042493.1	113701161	+	1.75186e-06	0.0183078	-32.5581
N/A	NW_021761423.1	440	+	1.30762e-07	0.00464864	-32.592
histone-lysine N-methyltransferase SETDB1-like	NC_042495.1	67291266	-	1.02075e-06	0.0133934	-32.5998
zinc finger protein 845-like	NC_042495.1	109265679	+	5.12004e-06	0.0295417	-32.6003
LOC115033186	NC_042493.1	96458241	+	1.10539e-06	0.0141105	-32.6087
LOC115034945	NW_021771100.1	17638	+	1.2421e-05	0.0439002	-32.6096
N/A	NC_042493.1	77046295	+	7.41015e-06	0.0352149	-32.6105
UPF0406 protein C16orf57-like	NC_042495.1	98882279	-	2.07426e-06	0.0195447	-32.6786
protein FAM91A1-like	NC_042495.1	52714059	+	3.86578e-06	0.0256685	-32.6788
LOC115034221	NC_042495.1	81186066	-	1.30919e-06	0.0154961	-32.7273
reversion-inducing cysteine-rich protein with Kazal motifs-like	NC_042494.1	26991791	-	6.25481e-06	0.0322809	-32.7826
uncharacterized LOC100570013	NC_042496.1	2296793	-	9.93612e-06	0.0398508	-32.786
LOC107883640	NC_042493.1	2589453	-	2.34827e-07	0.00638112	-32.7869
ribonuclease ZC3H12A-like	NC_042494.1	141735060	-	1.29894e-05	0.044666	-32.7941
N/A	NW_021770666.1	5600	-	1.45429e-07	0.00495048	-32.8042
copine-5-like	NC_042495.1	111169950	+	1.50611e-05	0.0475882	-32.8138
LOC103310531	NC_042493.1	60235250	-	6.84141e-06	0.0337101	-32.8321
N/A	NC_042493.1	45286045	-	8.83759e-06	0.0377002	-32.8341
uncharacterized LOC100571463	NC_042493.1	15921019	-	9.76699e-06	0.0395091	-32.8421
N/A	NC_042495.1	80591091	+	1.59094e-05	0.0489533	-32.8502
GPI inositol-deacylase-like	NC_042494.1	2069117	+	1.12144e-06	0.0142482	-32.861
integrin beta-PS-like	NC_042494.1	97773509	-	5.20074e-07	0.00934107	-32.941
LOC107883448	NC_042493.1	130053242	+	2.06555e-06	0.0195447	-32.9585
centrosomal protein of 290 kDa-like	NC_042495.1	109326208	-	2.5622e-06	0.0215073	-32.9648
N/A	NC_042495.1	28315710	-	1.00527e-05	0.0399862	-33
growth arrest-specific protein 2-like	NC_042496.1	33397417	+	1.00527e-05	0.0399862	-33
NADH dehydrogenase [ubiquinone] iron-sulfur protein 3, mitochondrial-like	NC_042494.1	114053116	-	9.7403e-06	0.0394454	-33.0317
N/A	NC_042495.1	6119212	-	1.15098e-05	0.0425326	-33.0447
N/A	NC_042496.1	20704090	+	9.69584e-06	0.0393095	-33.0484
N/A	NC_042495.1	32805748	-	3.28223e-06	0.0238615	-33.052
N/A	NC_042496.1	22134507	+	2.1852e-07	0.00622487	-33.0644
N/A	NC_042495.1	102078434	+	5.04757e-06	0.0292815	-33.0738
actin-related protein 2-like	NC_042493.1	75811903	-	7.67164e-06	0.0357203	-33.0952
LOC115033263	NC_042493.1	30755419	+	5.0209e-06	0.0292522	-33.1319
schwannomin-interacting protein 1-like	NC_042493.1	76494227	+	4.67833e-06	0.0281816	-33.1712
# uncharacterized LOC103307712 & uncharacterized LOC115034271	NC_042495.1	17758005	+	2.02199e-06	0.0194469	-33.1731
N/A	NC_042494.1	170152378	+	1.26503e-05	0.0440883	-33.1746
uncharacterized LOC100169539	NC_042494.1	160248393	+	1.06166e-05	0.0410149	-33.1944
N/A	NC_042495.1	42643421	+	3.37038e-10	0.000185161	-33.1999
triple functional domain protein-like	NC_042494.1	149853444	-	1.26258e-05	0.044088	-33.2051
N/A	NC_042493.1	119127284	+	7.22139e-07	0.0112314	-33.2329
protein melted-like	NC_042494.1	112804372	-	2.40058e-06	0.0207885	-33.2698
nuclear receptor subfamily 2 group C member 2-like	NC_042493.1	86127525	+	1.05634e-05	0.0409625	-33.282
serine/threonine-protein kinase minibrain-like	NC_042496.1	38926049	+	4.37619e-06	0.0271939	-33.3134
N/A	NC_042493.1	97833819	+	1.59356e-05	0.0489642	-33.3267
N/A	NC_042493.1	96161526	-	9.946e-06	0.0398757	-33.3333
N/A	NC_042493.1	97470408	+	3.16981e-06	0.0234377	-33.3333
N/A	NC_042493.1	112344392	-	9.77464e-08	0.0039044	-33.3333
dnaJ homolog subfamily C member 17-like	NC_042495.1	21023726	+	6.72281e-06	0.0334326	-33.3333
N/A	NC_042495.1	21420782	-	3.20267e-07	0.00748216	-33.3333
N/A	NC_042495.1	67095645	+	6.80492e-07	0.0109828	-33.3333
lysine-specific demethylase NO66-like	NC_042495.1	77851905	-	4.80666e-06	0.0285731	-33.3333
ubiquitin carboxyl-terminal hydrolase 16-like	NC_042494.1	90461891	-	3.40996e-06	0.0241563	-33.3431
N/A	NC_042493.1	21282020	+	3.37082e-06	0.0240691	-33.3449
uncharacterized LOC100572787	NC_042493.1	68958829	+	1.27434e-05	0.0442688	-33.3571
dynamin-1-like protein-like	NC_042493.1	18083906	-	1.41465e-05	0.0462974	-33.3619
cystinosin homolog	NC_042495.1	6054161	-	3.07968e-06	0.0231177	-33.364
f-box/LRR-repeat protein 4-like	NC_042494.1	121143688	-	2.86223e-06	0.0224317	-33.4325
uncharacterized protein CG42248-like	NC_042494.1	68667710	-	2.36562e-06	0.0206184	-33.4422
N/A	NC_042495.1	55268997	+	9.21526e-06	0.0383832	-33.4428
N/A	NC_042494.1	118904882	+	1.01127e-05	0.0400849	-33.4496
N/A	NC_042495.1	17275532	-	1.53859e-06	0.0169949	-33.4675
N/A	NC_042493.1	75688003	+	2.92776e-07	0.00712003	-33.4724
LOC103308359	NC_042493.1	122092095	+	6.80008e-06	0.0336273	-33.4737
N/A	NC_042493.1	43122180	-	7.87546e-06	0.0361233	-33.4751
RPA-interacting protein-like	NC_042494.1	72584591	+	2.85214e-07	0.00703283	-33.4753
LOC100160819	NC_042495.1	75600259	-	4.36692e-06	0.0271675	-33.4869
serine/threonine-protein kinase Nek7-like	NC_042493.1	3178718	+	1.18068e-05	0.0428594	-33.5056
cyclin-dependent kinase 20-like	NC_042494.1	27360079	+	1.28984e-06	0.0154455	-33.5065
possible pseudogene or miscRNA, No KEGG entry	NC_042494.1	33109031	-	7.73942e-07	0.0116197	-33.5069
casein kinase II beta subunit	NC_042496.1	21502145	-	7.85427e-06	0.0360978	-33.5086
uncharacterized LOC100572622	NC_042493.1	16605823	+	1.3246e-05	0.0450219	-33.5516
uncharacterized LOC100162635	NC_042494.1	72512734	-	8.10915e-07	0.0118462	-33.5543
casein kinase II beta subunit	NC_042496.1	21502155	-	3.47248e-06	0.0243927	-33.5718
ATP-dependent zinc metalloprotease YME1 homolog	NC_042493.1	31745627	+	1.14889e-05	0.0425326	-33.5784
annexin-B9-like	NC_042493.1	98219103	+	2.99178e-06	0.0228498	-33.5844
N/A	NC_042493.1	116468799	-	1.27018e-05	0.0442249	-33.5859
LOC100164352	NC_042494.1	118902308	+	1.04851e-05	0.0407249	-33.5866
ATP-binding cassette sub-family A member 3-like	NC_042495.1	8257691	-	1.42587e-06	0.0163679	-33.588
LOC107884132	NC_042493.1	130700900	-	1.76838e-06	0.0183183	-33.6081
serine hydroxymethyltransferase 1 (soluble) (EC:2.1.2.1)	NC_042494.1	53334173	-	1.0875e-05	0.0414447	-33.6113
uncharacterized LOC100571832	NC_042496.1	8351089	-	1.23128e-05	0.0437109	-33.6269
LOC103309354	NC_042493.1	84402790	-	1.84514e-06	0.0185115	-33.6472
LOC107884164	NC_042495.1	21815521	+	6.97328e-07	0.0110709	-33.6484
LOC103310168	NC_042496.1	22759778	+	1.39473e-05	0.0460478	-33.6559
LOC107883286	NC_042495.1	85006899	+	1.36683e-05	0.0455674	-33.6601
COP9 signalosome complex subunit 1b-like	NW_021770943.1	6150	+	6.05416e-06	0.0318955	-33.6792
uncharacterized LOC100165491	NC_042496.1	32800939	+	3.80484e-06	0.0254818	-33.6835
possible pseudogene or miscRNA, No KEGG entry	NC_042493.1	117293049	+	8.00273e-06	0.036345	-33.6856
probable phosphoglycerate kinase-like	NC_042495.1	79344239	+	7.62159e-06	0.0356076	-33.6908
LOC107883778	NC_042496.1	38650195	+	1.06667e-05	0.0411204	-33.7179
NAD-dependent deacetylase sirtuin-1-like	NC_042494.1	70098525	-	2.73679e-06	0.0219937	-33.723
N/A	NC_042493.1	131217067	+	9.40935e-06	0.0388544	-33.7395
N/A	NC_042495.1	16859872	+	3.14935e-06	0.0233875	-33.7461
testin-like	NC_042494.1	77494413	-	1.19229e-06	0.0149034	-33.75
LOC107884675	NC_042495.1	102007861	-	2.43251e-06	0.020948	-33.75
protein sarah-like	NC_042495.1	107544649	-	2.62751e-07	0.00670814	-33.7582
N/A	NW_021771368.1	14527	-	1.35256e-05	0.0453944	-33.7662
Golgi to ER traffic protein 4 homolog	NC_042495.1	72064863	-	6.27173e-06	0.0322809	-33.7887
LOC107882572	NW_021771002.1	9915	+	2.06878e-06	0.0195447	-33.7907
thymidine kinase-like	NC_042495.1	97837990	+	4.27075e-06	0.0268781	-33.7912
LOC115034741	NW_021770363.1	65125	+	4.64928e-06	0.028139	-33.8041
LOC103308462	NC_042493.1	105091411	+	3.7232e-06	0.0252752	-33.8095
N/A	NC_042493.1	36736878	+	1.03768e-06	0.0135335	-33.819
BRCA1-associated protein-like	NC_042494.1	69223187	+	1.50198e-05	0.0475294	-33.8331
leucine-rich repeat serine/threonine-protein kinase 1-like	NC_042495.1	78941334	+	1.4692e-05	0.0470252	-33.834
P protein-like	NC_042495.1	3930888	+	2.16153e-06	0.0199474	-33.8664
zinc finger protein 131-like	NC_042496.1	10306720	-	8.39186e-06	0.0370104	-33.8906
ATP-dependent RNA helicase A-like protein-like	NC_042495.1	34605803	+	1.24182e-06	0.015138	-33.8967
mRNA-decapping enzyme 2-like	NC_042495.1	34728458	-	1.65636e-08	0.00158672	-33.908
N/A	NC_042495.1	32802544	+	1.84653e-06	0.0185115	-33.9136
uncharacterized LOC100168266	NC_042495.1	50386036	-	2.41598e-07	0.00640996	-33.9181
transketolase-like protein 2-like	NC_042493.1	53980658	+	1.18236e-06	0.0148479	-33.9616
N/A	NW_021771219.1	709	+	9.84837e-09	0.00120777	-33.9623
uncharacterized LOC100568635	NC_042493.1	102611452	-	2.58048e-07	0.00664626	-33.9647
histone acetyltransferase KAT2A-like	NC_042494.1	94938016	+	1.47224e-05	0.0470392	-33.9719
# uncharacterized LOC107884138 & uncharacterized LOC100167890	NC_042493.1	70310866	+	1.4581e-05	0.0467807	-33.986
N/A	NC_042493.1	98415171	+	4.87018e-06	0.0287152	-34.0226
uncharacterized LOC100166817	NC_042496.1	34808358	-	1.49491e-06	0.0166655	-34.0407
uncharacterized LOC100572451	NC_042494.1	164648095	-	1.17615e-05	0.0427726	-34.0476
period	NC_042495.1	64049186	-	3.81662e-06	0.0255175	-34.0546
N/A	NC_042493.1	110995946	+	5.37818e-06	0.0302595	-34.0893
N/A	NC_042495.1	102299057	+	4.14061e-06	0.0264747	-34.0909
N/A	NC_042493.1	127741182	-	4.84441e-07	0.0091042	-34.1071
N/A	NC_042495.1	54263017	+	6.25521e-06	0.0322809	-34.1102
N/A	NC_042493.1	113739870	-	5.00552e-06	0.0291941	-34.1346
N/A	NC_042493.1	60952618	+	1.30078e-06	0.0154455	-34.1445
N/A	NC_042493.1	108343032	-	4.44065e-07	0.00879831	-34.1463
LOC107883900	NC_042495.1	17194289	+	9.36114e-06	0.0387507	-34.1484
AN1-type zinc finger protein 2B-like	NC_042494.1	98548339	+	1.1771e-05	0.0427726	-34.2001
ACYPI25621	NC_042493.1	47085157	-	1.91649e-06	0.0188085	-34.2221
LOC107883179	NC_042493.1	114867696	+	1.01379e-05	0.040106	-34.2262
N/A	NC_042493.1	111423225	-	8.55477e-06	0.037211	-34.2379
chondroitin sulfate proteoglycan 4-like	NC_042494.1	41412165	-	1.191e-05	0.0430355	-34.2799
N/A	NW_021769929.1	15083	+	3.64343e-06	0.0250278	-34.2879
N/A	NW_021771483.1	4156	+	4.75204e-08	0.00257521	-34.2897
N/A	NC_042493.1	106183499	-	1.17689e-05	0.0427726	-34.2963
NFX1-type zinc finger-containing protein 1-like	NC_042494.1	108693187	-	1.07863e-05	0.0412873	-34.2979
N/A	NC_042495.1	30052424	-	8.93223e-06	0.0378732	-34.3056
N/A	NC_042493.1	93615071	-	1.82619e-06	0.018447	-34.3228
WD repeat domain phosphoinositide-interacting protein 3-like	NC_042495.1	14037303	-	1.38827e-09	0.000354817	-34.3284
COP9 signalosome complex subunit 1b-like	NW_021770943.1	4681	+	2.87238e-08	0.00214416	-34.3937
LOC103309439	NC_042495.1	40719538	-	5.51351e-06	0.0305855	-34.3956
calcineurin-binding protein cabin-1-like	NC_042493.1	81895901	-	9.60827e-06	0.0391529	-34.4056
LOC107883664	NC_042493.1	105876725	+	2.60447e-06	0.0216835	-34.4551
N/A	NC_042495.1	16891177	+	6.70029e-06	0.0334085	-34.4615
uncharacterized LOC100569807	NC_042495.1	87922865	-	9.97851e-06	0.0399309	-34.4685
N/A	NC_042493.1	19448872	+	6.16865e-06	0.0320781	-34.4828
tRNA-splicing ligase RtcB homolog	NC_042496.1	21377996	-	1.38447e-07	0.00475771	-34.4848
LOC107885091	NW_021770871.1	98958	-	1.47203e-05	0.0470392	-34.5247
LOC107883323	NW_021770316.1	14728	+	2.98706e-06	0.0228498	-34.525
N/A	NC_042496.1	3695158	+	1.10463e-05	0.0417363	-34.537
N/A	NC_042493.1	131082437	-	1.76281e-06	0.0183183	-34.539
zinc finger protein 302-like	NC_042493.1	59007226	+	1.40079e-08	0.00148703	-34.5455
N/A	NC_042495.1	11407693	-	6.59292e-08	0.00307619	-34.5455
nitric oxide synthase interacting protein	NC_042494.1	113872066	-	1.06097e-06	0.0137708	-34.5644
LOC107884727	NC_042496.1	39230815	+	1.5584e-05	0.0484655	-34.5768
N/A	NC_042493.1	126044048	+	8.24996e-06	0.0367813	-34.5849
peroxisome biogenesis protein 6-like	NC_042493.1	81911136	+	2.01103e-06	0.0193976	-34.5875
breast cancer metastasis-suppressor 1-like protein-like	NC_042494.1	111338032	-	1.73248e-06	0.0182367	-34.6104
N/A	NC_042493.1	121210135	-	4.22964e-06	0.0267695	-34.6154
COP9 signalosome complex subunit 1b-like	NW_021770943.1	4543	-	1.07565e-05	0.0412462	-34.6154
uncharacterized LOC100164327	NC_042494.1	124728765	-	5.18245e-07	0.00934107	-34.6486
N/A	NC_042495.1	63170359	-	1.12648e-05	0.0421867	-34.6591
e3 SUMO-protein ligase RanBP2-like	NC_042495.1	86912403	+	2.76217e-06	0.0220666	-34.662
LOC100167963	NC_042495.1	62387601	+	1.59455e-05	0.0489667	-34.6627
N/A	NC_042493.1	91906054	+	5.30651e-08	0.00280207	-34.6667
n-acetyltransferase ESCO2-like	NC_042494.1	15167772	-	3.52741e-06	0.0246188	-34.6726
LOC103309435	NC_042495.1	85463315	+	2.86382e-06	0.0224317	-34.6733
dosage compensation regulator-like	NC_042493.1	105307428	-	1.42194e-05	0.046362	-34.7619
N/A	NC_042493.1	131363648	+	1.80465e-06	0.0184224	-34.7679
protein Mo25-like	NC_042493.1	4585661	+	8.98636e-06	0.0379393	-34.7932
probable protein phosphatase 2C T23F11.1-like	NC_042494.1	59938001	-	7.6764e-07	0.0115572	-34.8004
DET1- and DDB1-associated protein 1-like	NC_042495.1	28205585	-	5.55732e-06	0.0306769	-34.837
possible pseudogene or miscRNA, No KEGG entry	NC_042493.1	94910579	+	1.51604e-05	0.0477341	-34.8485
LOC107884916	NC_042493.1	126186095	+	1.06597e-07	0.0040774	-34.8485
LOC115033925	NC_042494.1	169406307	-	1.3279e-05	0.0450503	-34.8555
neurexin-4-like	NC_042495.1	38262078	-	1.8888e-06	0.0186851	-34.8635
uncharacterized LOC100569174	NC_042493.1	8373128	-	1.51861e-06	0.0168086	-34.8794
ral GTPase-activating protein subunit beta-like	NC_042494.1	92001117	+	2.22205e-06	0.0200629	-34.9094
trafficking kinesin-binding protein milt-like	NC_042496.1	9699257	+	4.39251e-06	0.0272172	-34.9179
coiled-coil domain-containing protein 22 homolog	NC_042493.1	47304345	-	6.31872e-06	0.0322809	-34.9216
# major facilitator superfamily domain-containing protein 6-A & uncharacterized LOC100574055	NC_042495.1	33228515	+	6.04652e-06	0.0318862	-34.9301
N/A	NC_042493.1	108419338	+	1.35283e-05	0.0453944	-34.9311
N/A	NC_042493.1	125430602	+	5.72025e-06	0.0310692	-34.9327
vesicle transport through interaction with t-SNAREs homolog 1B-like	NC_042494.1	90456949	+	1.23699e-06	0.0151132	-34.9348
uncharacterized LOC100573415	NC_042493.1	110289213	-	3.42897e-06	0.0242184	-34.9567
ras association domain-containing protein 8-like	NC_042495.1	101498974	-	3.45874e-06	0.0243595	-34.9624
LOC103310171	NC_042495.1	17079352	-	3.10297e-07	0.00730271	-34.9641
N/A	NC_042495.1	22656848	+	1.62562e-06	0.0176147	-34.9645
protein unc-45 homolog A-like	NC_042496.1	8559993	-	1.60313e-06	0.0174584	-34.985
anaphase-promoting complex subunit 1-like	NC_042494.1	133575109	+	1.58135e-05	0.0488777	-35
probable phospholipid-transporting ATPase IIB-like	NC_042495.1	55554393	+	1.02822e-05	0.0404037	-35
LOC115033217	NC_042493.1	111485484	-	1.12273e-05	0.0421359	-35.0157
recombination repair protein 1-like	NC_042495.1	44415778	+	9.11146e-06	0.0383007	-35.0373
uncharacterized LOC100162771	NC_042496.1	11265946	-	4.57778e-06	0.0279392	-35.0461
LMBR1 domain-containing protein 2 homolog	NC_042493.1	117399319	-	7.97267e-06	0.0363305	-35.049
LOC115034481	NC_042496.1	42031033	+	4.22838e-06	0.0267695	-35.056
uncharacterized LOC100163765	NC_042495.1	28987449	+	2.23669e-06	0.0200996	-35.0625
N/A	NC_042494.1	104174794	-	3.41204e-06	0.0241563	-35.0629
cadherin-87A-like	NC_042495.1	1580839	-	5.44498e-06	0.0304267	-35.0746
uncharacterized LOC100165690	NC_042495.1	23035840	+	9.05165e-06	0.0381554	-35.0746
N/A	NC_042494.1	170129245	+	1.4412e-05	0.0466392	-35.0772
neurogenic protein big brain-like	NC_042495.1	4134651	-	3.60286e-07	0.00793434	-35.0933
SH2B adapter protein 2-like	NC_042494.1	65019632	+	4.17772e-06	0.0265707	-35.0987
LOC103309427	NW_021770798.1	4322	+	4.90356e-07	0.00913544	-35.1136
zinc finger protein 161 homolog	NC_042493.1	85114452	+	8.0075e-06	0.036345	-35.119
e3 ubiquitin-protein ligase listerin-like	NC_042495.1	89594636	-	7.75877e-06	0.0359142	-35.1351
uncharacterized LOC100162209	NC_042496.1	27882790	+	4.57439e-06	0.0279392	-35.1366
uncharacterized LOC100571224	NC_042493.1	33946695	+	1.43334e-05	0.0465725	-35.1462
n6-adenosine-methyltransferase 70 kDa subunit-like	NC_042496.1	27575761	-	2.0532e-06	0.0195447	-35.1468
# uncharacterized LOC100160247 & uncharacterized LOC107882879	NC_042494.1	130864808	-	1.5038e-05	0.0475562	-35.1606
N/A	NC_042496.1	42056630	+	1.09577e-06	0.0140541	-35.165
arf-GAP with coiled-coil, ANK repeat and PH domain-containing protein 3-like	NC_042493.1	89133563	+	1.73861e-06	0.0182367	-35.1948
N/A	NC_042494.1	20623922	-	5.17451e-06	0.0296576	-35.2157
transmembrane protein 194A-like	NC_042494.1	55930218	+	7.30671e-06	0.0349202	-35.2203
putative ATP-dependent RNA helicase DHX33-like	NC_042494.1	1533591	-	4.38902e-06	0.0272172	-35.2292
N/A	NC_042493.1	95231793	+	1.33124e-05	0.0450945	-35.2355
uncharacterized LOC100574933	NC_042493.1	126283760	-	8.00719e-06	0.036345	-35.2508
N/A	NC_042494.1	134707323	-	8.00719e-06	0.036345	-35.2508
LOC107883495	NW_021770573.1	2211	-	9.30671e-07	0.0127889	-35.2743
N/A	NC_042493.1	96160376	-	1.30021e-06	0.0154455	-35.2793
N/A	NC_042493.1	120614647	-	1.08626e-06	0.0139816	-35.2941
N/A	NC_042493.1	128203232	+	3.57153e-06	0.024783	-35.3261
uncharacterized LOC100571935	NC_042494.1	87311047	+	9.21916e-06	0.0383832	-35.3633
N/A	NC_042493.1	54173913	+	1.2741e-08	0.00139256	-35.3846
N/A	NC_042495.1	69726096	-	2.66164e-06	0.0218645	-35.4037
N/A	NC_042495.1	22826254	+	7.99914e-07	0.011797	-35.4073
uncharacterized LOC100569586	NC_042493.1	117186492	+	9.72079e-07	0.0130716	-35.4167
uncharacterized LOC100160178	NC_042493.1	57932964	+	7.31258e-07	0.0112493	-35.4248
mitochondrial-processing peptidase subunit beta-like	NC_042495.1	52056785	+	2.74986e-06	0.0220432	-35.4421
uncharacterized LOC100164397	NC_042496.1	26633741	-	4.67755e-06	0.0281816	-35.453
N/A	NC_042493.1	119135650	-	6.13294e-06	0.0320415	-35.4545
histone deacetylase 6-like	NC_042493.1	35175273	-	9.78661e-06	0.0395442	-35.4555
protein retinal degeneration B-like	NC_042495.1	97031018	+	1.63152e-05	0.0495276	-35.4599
fat-like cadherin-related tumor suppressor homolog	NC_042494.1	77955142	+	9.34638e-07	0.0127906	-35.4699
TFIIA-alpha and beta-like factor-like	NC_042495.1	68779967	+	1.88282e-07	0.00580347	-35.4839
N/A	NW_021761949.1	2416	+	5.54262e-06	0.030627	-35.53
e3 SUMO-protein ligase PIAS1-like	NC_042493.1	117494678	-	1.28645e-08	0.00139256	-35.5426
lysine-specific demethylase 6A-like	NC_042494.1	90181145	-	4.05256e-06	0.0262372	-35.5484
LOC103308808	NC_042493.1	99072096	-	1.43909e-06	0.016437	-35.5556
LOC115034616	NW_021765320.1	1521	-	5.06509e-07	0.00924507	-35.5556
proton-coupled amino acid transporter 4-like	NC_042493.1	57140953	-	8.37499e-06	0.0370104	-35.5563
v-type proton ATPase 116 kDa subunit a isoform 1-like	NC_042494.1	116392895	-	4.62691e-06	0.028075	-35.5698
abhydrolase domain-containing protein 3-like	NC_042494.1	43167723	+	1.50151e-05	0.0475294	-35.5835
LOC107884889	NC_042493.1	96395819	-	3.47051e-07	0.00782313	-35.5932
protein TRC8 homolog	NC_042495.1	108386046	-	4.29893e-08	0.00248852	-35.5932
# farnesol dehydrogenase-like & DNA repair protein REV1	NC_042494.1	42352674	+	1.19122e-07	0.00437111	-35.7393
N/A	NC_042493.1	125582749	-	7.8006e-06	0.0359934	-35.7592
N/A	NC_042493.1	126503672	+	1.8294e-06	0.018447	-35.7778
uncharacterized LOC100168472	NC_042495.1	5084823	-	2.89163e-06	0.0225841	-35.7808
attractin-like protein 1-like	NC_042496.1	22893229	-	1.00303e-06	0.0132892	-35.7843
N/A	NC_042494.1	167238905	-	1.30191e-07	0.00464864	-35.7994
N/A	NC_042495.1	8059132	-	7.44901e-06	0.0352424	-35.8182
prefoldin subunit 1-like	NC_042495.1	116534825	+	5.51682e-09	0.000841112	-35.8209
LOC107882909	NC_042493.1	99399824	-	1.43914e-05	0.0466076	-35.8454
eukaryotic translation initiation factor 4E-1B-like	NC_042493.1	60311050	-	8.55032e-06	0.037211	-35.8483
possible pseudogene or miscRNA, No KEGG entry	NC_042495.1	6545181	-	1.30599e-05	0.0447947	-35.8596
N/A	NC_042493.1	131337649	+	1.5865e-05	0.0488777	-35.8654
ring canal kelch homolog	NC_042494.1	168676619	-	8.08461e-06	0.0364798	-35.8709
U3 small nucleolar ribonucleoprotein protein IMP3-like	NC_042495.1	89737923	+	2.1536e-06	0.0199252	-35.8868
oxysterol-binding protein 1-like	NC_042494.1	80896830	-	3.96315e-06	0.0258749	-35.8974
LOC103308211	NC_042493.1	123926767	+	8.3882e-06	0.0370104	-35.8986
N/A	NC_042493.1	127741183	+	8.32996e-06	0.0369856	-35.9165
serine/arginine-rich splicing factor 1-like	NC_042494.1	93287094	-	1.35441e-05	0.0454191	-35.9257
uncharacterized LOC100169066	NC_042495.1	1063092	-	5.67022e-06	0.0309219	-35.9472
N/A	NC_042495.1	8339522	-	5.41543e-06	0.0303495	-35.9649
putative neutral sphingomyelinase-like	NC_042494.1	27313591	+	4.45512e-07	0.00879831	-35.9674
N/A	NC_042494.1	10978921	+	1.61747e-05	0.0493628	-35.9694
uncharacterized LOC100167707	NC_042493.1	31075575	+	6.00395e-06	0.0318589	-35.9852
uncharacterized LOC100160707	NC_042495.1	6147737	+	4.37801e-07	0.00879831	-35.9905
uncharacterized LOC100574406	NC_042495.1	21876650	+	5.15522e-06	0.0296361	-35.9958
protein PIEZO2-like	NC_042493.1	88398611	-	1.70698e-06	0.0181447	-36
N/A	NC_042495.1	3861110	+	3.37467e-08	0.00234169	-36.0065
mitochondrial uncoupling protein 4-like	NC_042494.1	58179058	+	3.26527e-06	0.0238563	-36.0322
N/A	NW_021776129.1	540	-	2.2742e-06	0.0202405	-36.0333
DNA (cytosine-5)-methyltransferase 3B-like	NC_042493.1	132299118	+	1.40719e-05	0.0462628	-36.039
probable ATP-dependent RNA helicase DDX47-like	NC_042495.1	52053568	+	4.66408e-06	0.0281584	-36.0412
# actin-histidine N-methyltransferase & probable serine/threonine-protein kinase nek3	NC_042494.1	104407304	-	3.42976e-06	0.0242184	-36.0531
uncharacterized LOC100571347	NC_042493.1	76854512	+	6.87708e-06	0.0337514	-36.0568
uncharacterized LOC100570253	NC_042496.1	22128542	-	2.56121e-07	0.00661689	-36.0799
N/A	NC_042493.1	111499214	-	1.34578e-06	0.0157399	-36.0905
protein pellino-like	NC_042493.1	76824899	+	4.15258e-06	0.0265106	-36.1538
N/A	NC_042493.1	78273960	+	3.79142e-06	0.0254491	-36.1575
LOC107885251	NC_042493.1	111590413	+	5.90687e-09	0.000875109	-36.1702
uncharacterized LOC100570654	NC_042493.1	111769869	+	6.23247e-08	0.00298426	-36.1702
LOC107882365	NC_042495.1	63202505	+	3.50963e-06	0.0245591	-36.1873
mps one binder kinase activator-like 2-like	NC_042493.1	18277621	-	1.29369e-06	0.0154455	-36.2237
possible pseudogene or miscRNA, No KEGG entry	NC_042493.1	93534004	+	3.64844e-06	0.0250278	-36.2389
N/A	NC_042495.1	97230634	+	2.55326e-06	0.0214902	-36.2456
uncharacterized LOC100160085	NC_042493.1	106223742	+	1.93719e-07	0.00587391	-36.2662
LOC100162510	NC_042495.1	114951811	-	1.16529e-05	0.0426927	-36.2709
N/A	NC_042494.1	169024618	+	1.05867e-05	0.0409666	-36.2773
fragile X mental retardation syndrome-related protein 1-like	NC_042493.1	122009995	+	1.06882e-05	0.0411493	-36.3095
e3 ubiquitin-protein ligase AMFR-like	NC_042494.1	66594657	+	8.20495e-06	0.0367015	-36.3122
N/A	NC_042493.1	118900280	-	9.11897e-06	0.0383007	-36.3426
dihydroxyacetone phosphate acyltransferase-like	NC_042493.1	68506340	+	9.61501e-06	0.0391529	-36.3544
LOC103309117	NC_042493.1	80445312	+	7.10139e-06	0.0343572	-36.4013
possible pseudogene or miscRNA, No KEGG entry	NW_021771486.1	23703	-	2.58692e-06	0.0216073	-36.4155
LOC115033932	NC_042494.1	170032179	+	1.13903e-05	0.042338	-36.4277
probable 28S ribosomal protein S26, mitochondrial-like	NC_042495.1	42799247	+	2.158e-07	0.00617993	-36.455
N/A	NC_042493.1	107920961	+	7.53042e-06	0.0353766	-36.4759
N/A	NW_021770544.1	53779	-	1.27239e-05	0.0442633	-36.4791
uncharacterized LOC100161003	NC_042495.1	110651108	+	7.61628e-06	0.0355982	-36.4828
BTB/POZ domain-containing protein 2-like	NC_042494.1	117825075	-	4.24808e-06	0.0267978	-36.4865
N/A	NC_042495.1	76891656	-	9.78826e-07	0.0131362	-36.4973
N/A	NC_042493.1	4504365	-	3.46404e-06	0.0243763	-36.504
N/A	NC_042493.1	27530161	+	1.60085e-05	0.049049	-36.5217
uncharacterized LOC100168394	NC_042495.1	73629861	-	3.59192e-07	0.00793434	-36.5385
proton-coupled folate transporter-like	NC_042493.1	115399454	-	4.18664e-06	0.0266047	-36.5444
possible pseudogene or miscRNA, No KEGG entry	NC_042493.1	93525985	-	7.50874e-07	0.011432	-36.5469
neurexin-4-like	NC_042494.1	72592867	+	1.29478e-05	0.044666	-36.5634
uncharacterized LOC100165612	NC_042493.1	80452655	+	4.58808e-06	0.0279661	-36.5934
uncharacterized LOC100164182	NC_042493.1	10931311	-	1.88301e-06	0.0186832	-36.6016
uncharacterized LOC100573822	NC_042493.1	80526717	+	5.40674e-06	0.0303495	-36.6189
N/A	NC_042493.1	115276446	+	6.93127e-09	0.000949749	-36.6246
mature T-cell proliferation 1 neighbor protein-like	NC_042493.1	77037605	-	8.899e-06	0.0378154	-36.6319
LOC107883448	NC_042493.1	130054883	-	5.34135e-07	0.00943344	-36.6321
N/A	NC_042493.1	120799764	-	1.20112e-05	0.0431815	-36.6435
N/A	NC_042494.1	125176003	-	1.20112e-05	0.0431815	-36.6435
possible pseudogene or miscRNA, No KEGG entry	NC_042495.1	23840549	-	5.66483e-06	0.0309219	-36.6556
N/A	NC_042496.1	22613094	-	2.11287e-07	0.00609908	-36.6597
rhomboid-related protein 3-like	NC_042496.1	39220331	+	1.34762e-05	0.0453319	-36.6667
uncharacterized LOC100571391	NC_042494.1	128740914	+	1.82788e-06	0.018447	-36.6709
oxysterol-binding protein 1-like	NC_042494.1	80911576	-	6.13902e-06	0.0320415	-36.697
N/A	NC_042495.1	21357289	+	1.59451e-07	0.0052946	-36.7072
uncharacterized LOC100571833	NC_042493.1	122160117	+	1.17331e-05	0.0427508	-36.7127
uncharacterized LOC100161177	NC_042494.1	43173152	+	5.49966e-06	0.0305769	-36.7157
N/A	NC_042493.1	13884596	+	1.6483e-05	0.0497288	-36.7164
# ribonuclease H1-like & chondroitin sulfate synthase 2	NC_042495.1	45002457	+	7.87948e-08	0.00339819	-36.7241
uncharacterized LOC100569937	NC_042495.1	21311516	+	7.76851e-06	0.0359142	-36.7389
voltage-dependent L-type calcium channel subunit beta-2-like	NC_042494.1	22703206	+	2.02547e-06	0.0194469	-36.7407
kelch-like protein 3-like	NW_021771438.1	89535	-	1.23081e-05	0.0437109	-36.7478
coronin-2B-like	NC_042494.1	121040877	-	5.04262e-06	0.0292815	-36.7647
UNC93-like protein MFSD11-like	NC_042494.1	44853999	+	5.08224e-06	0.0293725	-36.7677
N/A	NW_021770278.1	682	-	1.10236e-05	0.0417127	-36.7733
ATP-binding cassette sub-family G member 8-like	NC_042494.1	85493515	-	1.41299e-05	0.0462974	-36.7857
probable mannosyl-oligosaccharide glucosidase-like	NC_042493.1	79573361	+	5.77548e-06	0.0312236	-36.7965
facilitated trehalose transporter Tret1-like	NC_042495.1	111108742	+	5.46265e-06	0.0304807	-36.7965
N/A	NC_042493.1	119037134	-	5.36767e-06	0.0302595	-36.8286
N/A	NC_042493.1	121583719	-	5.36767e-06	0.0302595	-36.8286
mothers against decapentaplegic homolog 4-like	NC_042493.1	124308001	+	2.60928e-06	0.0216937	-36.8398
uncharacterized LOC100575099	NC_042495.1	25409324	-	4.25236e-07	0.00870597	-36.8421
LOC103310168	NC_042496.1	22759450	-	4.70257e-06	0.0282249	-36.8421
WD repeat-containing protein 47-like	NC_042494.1	126396941	-	4.82983e-06	0.0286479	-36.8534
uncharacterized LOC100166566	NC_042494.1	117758520	+	3.26721e-06	0.0238563	-36.8577
# alpha-ketoglutarate-dependent dioxygenase alkB homolog 4 & DNA helicase MCM8-like	NC_042494.1	108760080	+	9.80167e-06	0.0395689	-36.8798
N/A	NC_042494.1	140378117	+	2.39122e-06	0.0207576	-36.9048
lamin Dm0-like	NC_042495.1	28328119	+	2.40439e-07	0.00639491	-36.9077
LOC107882596	NC_042494.1	5999419	-	1.48371e-06	0.0166208	-36.9153
TATA box-binding protein-like protein 1-like	NC_042495.1	112100530	-	7.52056e-06	0.0353766	-36.9256
N/A	NC_042493.1	111499194	-	3.36893e-06	0.0240691	-36.9362
peroxisomal targeting signal 1 receptor-like	NC_042495.1	51047031	+	1.40173e-05	0.0461763	-36.9447
LOC103307778	NC_042495.1	63206066	+	4.73738e-07	0.00901812	-36.9565
uncharacterized LOC100166129	NC_042496.1	33656908	+	3.05911e-07	0.00726195	-36.9658
ectoderm-neural cortex protein 1-like	NW_021771438.1	101486	+	2.30587e-07	0.00638112	-36.9694
N/A	NC_042493.1	102995665	-	2.33811e-06	0.020527	-36.9697
uncharacterized LOC100165836	NC_042494.1	111712845	-	4.86538e-06	0.0287152	-36.978
uncharacterized LOC100569692	NC_042494.1	48581778	-	1.25575e-05	0.0440199	-36.9878
LOC107882358	NC_042493.1	107965210	-	5.63797e-06	0.0308858	-36.999
N/A	NC_042493.1	78275489	-	6.57228e-06	0.0329972	-37.0062
exocyst complex component sec3-like	NC_042495.1	96226702	-	2.71674e-09	0.000519084	-37.0081
neurochondrin homolog	NC_042493.1	91240923	+	8.39476e-06	0.0370104	-37.037
LOC103307692	NC_042493.1	100454256	+	2.50655e-07	0.00653423	-37.0602
uncharacterized LOC100573415	NC_042493.1	110289244	-	1.43049e-05	0.0465292	-37.0656
g2/M phase-specific E3 ubiquitin-protein ligase-like	NC_042493.1	131977451	-	1.3118e-05	0.044889	-37.1552
uncharacterized LOC100160813	NC_042495.1	115310741	+	8.79303e-06	0.0376594	-37.1736
uncharacterized LOC100573606	NW_021770820.1	74431	+	6.55471e-07	0.0107343	-37.2005
N/A	NC_042495.1	30052441	-	1.13652e-06	0.014394	-37.2121
uncharacterized LOC100568635	NC_042493.1	102611475	-	1.2792e-07	0.00460041	-37.2222
N/A	NC_042494.1	54086187	-	7.02535e-06	0.0341638	-37.2253
abnormal spindle-like microcephaly-associated protein homolog	NC_042494.1	23651678	+	1.16273e-05	0.0426927	-37.231
LOC107885685	NC_042493.1	119726094	-	1.00111e-05	0.0399444	-37.2506
N/A	NC_042493.1	125867539	+	1.5901e-05	0.0489529	-37.2894
N/A	NC_042494.1	157509393	-	6.07916e-06	0.0319365	-37.3506
LOC100158926	NC_042495.1	71984373	+	6.15356e-08	0.00298426	-37.3652
lymphocyte-specific helicase-like	NC_042493.1	85939564	-	3.86389e-06	0.0256685	-37.3684
N/A	NC_042496.1	22617804	-	5.50591e-06	0.0305855	-37.3695
uncharacterized LOC100571125	NC_042493.1	122980114	+	7.3275e-06	0.0350041	-37.379
N/A	NC_042493.1	100996407	+	3.95614e-06	0.0258749	-37.389
uncharacterized LOC100160598	NC_042495.1	115230267	-	9.62829e-06	0.0391529	-37.4026
LOC100160819	NC_042495.1	75585259	-	1.4654e-05	0.0469451	-37.4044
# proton channel OtopLc & nuclear pore complex protein nup98 & uncharacterized LOC115033788	NC_042494.1	91011371	-	1.47159e-05	0.0470392	-37.4067
N/A	NW_021771458.1	8922	+	2.30015e-06	0.0203256	-37.4264
uncharacterized LOC100160259	NC_042496.1	15842304	-	3.36909e-06	0.0240691	-37.444
uncharacterized LOC100572787	NC_042493.1	68959278	+	1.11694e-06	0.0142245	-37.5325
N/A	NC_042494.1	90925911	+	5.49707e-07	0.00961311	-37.535
N/A	NC_042495.1	35015424	+	4.8452e-06	0.028697	-37.5479
N/A	NC_042493.1	95231322	+	1.0375e-05	0.0404233	-37.5741
LOC107882406	NC_042493.1	19580542	-	1.55611e-05	0.0484183	-37.5758
pyruvate carboxylase, mitochondrial-like	NC_042494.1	122975179	-	1.73685e-06	0.0182367	-37.5774
# uncharacterized LOC103307712 & uncharacterized LOC100572172	NC_042495.1	17710188	-	1.02851e-06	0.0134626	-37.6054
e3 SUMO-protein ligase PIAS1-like	NC_042493.1	117494023	+	1.30985e-06	0.0154961	-37.6121
heterogeneous nuclear ribonucleoprotein L-like	NC_042493.1	76761511	+	3.65622e-08	0.00239867	-37.619
N/A	NC_042493.1	114804354	-	5.06952e-06	0.0293146	-37.619
N/A	NC_042495.1	41805052	-	6.63445e-06	0.0331566	-37.6374
N/A	NC_042495.1	78108909	+	1.2316e-05	0.0437109	-37.6449
protein FAM73B-like	NC_042493.1	120487235	-	4.70714e-07	0.00901812	-37.6585
UPF0493 protein AAEL009648-like	NC_042494.1	149484990	-	1.7959e-06	0.0183921	-37.6631
guanylate cyclase 32E-like	NC_042495.1	94335418	+	1.54966e-05	0.0483564	-37.6653
LOC107882867	NC_042493.1	2335997	-	4.80087e-07	0.00905729	-37.6746
N/A	NC_042493.1	94435471	-	1.41191e-05	0.0462974	-37.6812
uncharacterized LOC100568914	NC_042495.1	79833277	-	5.79996e-06	0.0312236	-37.6812
uncharacterized LOC100570654	NC_042493.1	111769892	+	4.63557e-06	0.0281118	-37.6906
lisH domain and HEAT repeat-containing protein KIAA1468-like	NC_042495.1	103826672	-	4.99982e-07	0.0091733	-37.6948
COP9 signalosome complex subunit 4-like	NC_042493.1	94282716	-	2.32605e-07	0.00638112	-37.6996
uncharacterized LOC100163939	NC_042496.1	17739909	+	1.30671e-06	0.0154929	-37.7028
# claspin & uncharacterized LOC100575399	NC_042493.1	71747489	+	4.90586e-06	0.0288303	-37.709
N/A	NC_042493.1	131025997	-	8.43608e-07	0.0122085	-37.7114
# uncharacterized LOC103307712 & uncharacterized LOC107883430 & uncharacterized LOC107883432	NC_042495.1	17716754	+	1.21437e-05	0.0434572	-37.7252
cation-independent mannose-6-phosphate receptor-like	NC_042495.1	103869832	+	5.23444e-07	0.00937448	-37.7252
N/A	NC_042496.1	42058397	-	3.07525e-06	0.0231175	-37.7311
N/A	NC_042493.1	45351896	-	1.18846e-05	0.0429978	-37.7397
N/A	NC_042493.1	94521691	-	9.59588e-06	0.0391529	-37.7551
uncharacterized protein KIAA0195-like	NC_042494.1	97690830	+	2.07978e-07	0.00603537	-37.7652
N/A	NC_042494.1	7816576	+	7.71698e-06	0.0358433	-37.7894
N/A	NC_042495.1	75745386	-	4.78092e-06	0.028514	-37.7969
LOC115034768	NC_042493.1	111764370	+	1.27501e-05	0.0442688	-37.8075
USP6 N-terminal-like protein-like	NC_042494.1	124440224	-	1.31501e-05	0.0448915	-37.8299
LOC103308338	NC_042493.1	7060197	-	4.40711e-06	0.0272764	-37.8412
uncharacterized LOC100168266	NC_042495.1	50384017	-	1.19349e-05	0.0430807	-37.8442
LOC115034562	NC_042493.1	103093454	+	1.01842e-05	0.0402199	-37.8571
LOC100163423	NC_042494.1	42614390	+	1.13526e-05	0.0422204	-37.8571
LOC100166016	NC_042493.1	61827327	+	2.00132e-06	0.0193738	-37.8671
N/A	NC_042495.1	102080177	+	1.82857e-06	0.018447	-37.8676
N/A	NC_042493.1	110704335	-	7.93945e-07	0.011757	-37.8723
N/A	NC_042494.1	167238913	-	2.13436e-06	0.019832	-37.8775
# uncharacterized LOC100571978 & uncharacterized LOC107884448	NC_042493.1	113537998	+	3.7406e-08	0.00242465	-37.8968
uncharacterized LOC100570502	NC_042494.1	138171204	-	1.07014e-05	0.0411809	-37.8968
LOC107882771	NC_042493.1	120476314	-	7.77872e-06	0.0359384	-37.8995
acetyl-CoA acetyltransferase, cytosolic-like	NC_042493.1	131466580	-	7.47935e-06	0.0352966	-37.9048
adenosine 3'-phospho 5'-phosphosulfate transporter 2-like	NC_042494.1	112704089	+	1.67348e-07	0.00544077	-37.9168
possible pseudogene or miscRNA, No KEGG entry	NC_042493.1	96759837	+	2.28743e-06	0.020296	-37.9571
LOC115033360	NC_042493.1	109661651	+	9.16607e-06	0.0383346	-37.9599
e3 ubiquitin-protein ligase Topors-like	NC_042493.1	114807615	-	6.49872e-06	0.0327504	-37.9728
possible pseudogene or miscRNA, No KEGG entry	NC_042493.1	98513273	-	9.54581e-06	0.0390903	-37.9926
N/A	NC_042493.1	21604868	+	1.14004e-05	0.042338	-38.0102
mediator of RNA polymerase II transcription subunit 13-like	NC_042496.1	34947920	-	4.66032e-06	0.0281514	-38.019
LOC103312028	NC_042495.1	110740797	-	9.09385e-08	0.00372878	-38.0267
LOC107885578	NC_042493.1	106961172	-	3.97961e-08	0.00248852	-38.0385
uncharacterized LOC100159378	NC_042494.1	28565713	+	2.79113e-06	0.0221996	-38.0615
possible pseudogene or miscRNA, No KEGG entry	NC_042495.1	63978922	+	2.85058e-06	0.022409	-38.0896
N/A	NC_042493.1	47937176	-	1.22307e-05	0.0435798	-38.0952
LOC103309809	NC_042493.1	131745362	+	1.64525e-05	0.0496823	-38.0952
N/A	NC_042493.1	85418120	+	2.1835e-06	0.020006	-38.1
# zinc finger protein 569 & procollagen-lysine,2-oxoglutarate 5-dioxygenase	NC_042495.1	54353706	+	4.39024e-06	0.0272172	-38.1008
N/A	NC_042495.1	53323948	-	4.73093e-07	0.00901812	-38.1046
N/A	NC_042493.1	120686872	-	1.45746e-05	0.0467807	-38.1402
LOC103308359	NC_042493.1	122091698	-	1.49272e-05	0.047358	-38.1746
N/A	NC_042493.1	9927769	+	2.95459e-06	0.0227962	-38.1818
N/A	NC_042493.1	110277699	+	1.472e-05	0.0470392	-38.2069
peroxisomal targeting signal 1 receptor-like	NC_042495.1	51028716	-	5.90068e-06	0.0316052	-38.2206
uncharacterized LOC100165581	NC_042493.1	86057021	-	7.40093e-06	0.0352149	-38.2264
# uncharacterized LOC100572851 & uncharacterized LOC107884486	NC_042494.1	168190243	-	1.34634e-07	0.00470128	-38.2307
N/A	NC_042493.1	130004184	+	3.16843e-06	0.0234377	-38.2308
solute carrier family 22 member 21-like	NC_042493.1	69437531	+	3.64791e-06	0.0250278	-38.2353
metal transporter CNNM2-like	NC_042493.1	91489163	-	1.64089e-05	0.0496603	-38.2532
uncharacterized LOC100571897	NC_042495.1	27056536	-	9.54855e-07	0.0129526	-38.3038
N/A	NW_021771368.1	14518	-	1.72083e-06	0.0181961	-38.3225
protein-L-isoaspartate O-methyltransferase domain-containing protein 2-like	NC_042493.1	112997432	+	1.42226e-05	0.046362	-38.3242
LOC107885716	NC_042493.1	109711045	+	5.05924e-06	0.0293146	-38.3333
small ubiquitin-related modifier-like	NC_042493.1	105090238	+	1.20483e-05	0.0432719	-38.3666
LOC107884888	NC_042493.1	96427581	-	1.1311e-07	0.00419317	-38.3702
multidrug resistance-associated protein 1-like	NC_042494.1	146015594	-	1.20467e-06	0.0149371	-38.3706
activating transcription factor 7-interacting protein 1-like	NC_042493.1	92263880	-	7.55937e-06	0.0354634	-38.4054
N/A	NC_042495.1	65734403	-	1.004e-05	0.0399862	-38.4066
N/A	NC_042494.1	90925886	+	5.92566e-08	0.00291324	-38.4413
uncharacterized LOC100573415	NC_042493.1	110289240	-	4.31007e-07	0.00872515	-38.4444
N/A	NC_042493.1	105895933	+	8.97372e-06	0.0379262	-38.447
# putative leucine-rich repeat-containing protein DDB_G0290503 & importin subunit alpha-1	NC_042495.1	101431329	-	1.41882e-05	0.0463038	-38.4498
N/A	NC_042494.1	91995021	-	1.23671e-05	0.0438209	-38.4615
uncharacterized LOC100164759	NC_042495.1	53190534	-	1.48907e-05	0.0472838	-38.474
kelch-like protein 2-like	NC_042494.1	47164418	-	8.57092e-08	0.00358221	-38.4804
bifunctional aminoacyl-tRNA synthetase-like	NC_042493.1	28407960	-	4.20669e-08	0.00248852	-38.483
neuronal membrane glycoprotein M6-a-like	NC_042493.1	55988458	-	1.48087e-05	0.0471942	-38.4848
BUD31 homolog	NC_042495.1	85753648	+	1.39127e-05	0.0460278	-38.4906
N/A	NC_042494.1	169026447	-	1.30895e-05	0.0448646	-38.5034
serine hydroxymethyltransferase 1 (soluble) (EC:2.1.2.1)	NC_042494.1	53334180	-	1.89696e-07	0.00580347	-38.5158
N/A	NC_042493.1	97541212	+	2.07386e-06	0.0195447	-38.5291
LOC103311925	NC_042493.1	18675890	+	4.71589e-06	0.0282249	-38.5294
N/A	NC_042493.1	88451019	+	1.16892e-05	0.042711	-38.5307
# rap guanine nucleotide exchange factor 4 & integrator complex subunit 13	NC_042496.1	7028395	-	8.6876e-06	0.0374532	-38.5613
N/A	NC_042493.1	83064254	-	1.342e-05	0.0452976	-38.5965
LOC100145825	NC_042496.1	36928124	-	1.12967e-05	0.0421905	-38.6026
N/A	NC_042495.1	102658136	-	1.03613e-05	0.0404181	-38.6217
protein mothers against dpp-like	NC_042496.1	8469886	-	1.45001e-05	0.0467147	-38.6364
voltage-dependent L-type calcium channel subunit beta-2-like	NC_042494.1	22701315	-	1.67099e-09	0.000384856	-38.6486
transcription initiation factor TFIID subunit 10-like	NC_042495.1	63987825	-	1.95805e-06	0.0191052	-38.6593
N/A	NC_042493.1	36707310	-	1.02789e-05	0.0404037	-38.6806
N/A	NW_021770281.1	6604	-	6.84174e-06	0.0337101	-38.7039
possible pseudogene or miscRNA, No KEGG entry	NC_042493.1	7633003	-	4.57182e-06	0.0279392	-38.714
N/A	NC_042495.1	103413533	+	1.13363e-05	0.0422137	-38.7402
uncharacterized LOC100574406	NC_042495.1	21876695	+	6.22261e-07	0.0103789	-38.7436
uncharacterized LOC100162880	NC_042496.1	41899535	-	2.3848e-07	0.00638112	-38.7461
N/A	NC_042496.1	27604904	-	6.34708e-06	0.0323557	-38.7682
uncharacterized LOC100160854	NC_042493.1	67888116	+	3.50219e-06	0.0245591	-38.7785
regulator of telomere elongation helicase 1 homolog	NC_042494.1	30527625	+	1.08376e-05	0.0413666	-38.7965
N/A	NC_042495.1	106124227	-	2.06027e-06	0.0195447	-38.8005
LOC100163879	NC_042493.1	72118202	-	6.04347e-06	0.0318862	-38.8132
N/A	NC_042495.1	85924925	-	6.04347e-06	0.0318862	-38.8132
uncharacterized LOC100164619	NC_042493.1	46524985	-	6.57512e-06	0.0329972	-38.8357
zinc finger RNA-binding protein 2-like	NC_042496.1	1767532	+	2.21165e-07	0.00625087	-38.8494
LOC100164040	NC_042495.1	116097912	+	1.24822e-05	0.0439552	-38.8527
uncharacterized LOC100168266	NC_042495.1	50385976	-	3.01692e-06	0.0228856	-38.8655
ring canal kelch homolog	NC_042494.1	113458906	-	3.18012e-06	0.0234394	-38.8715
N/A	NC_042494.1	86208138	-	1.36119e-05	0.0455097	-38.8938
N/A	NC_042493.1	27530955	-	1.35217e-05	0.0453944	-38.9071
N/A	NC_042493.1	132210840	-	8.11511e-06	0.0365178	-38.9256
N/A	NC_042495.1	103601580	-	2.42902e-07	0.00642882	-38.9342
uncharacterized LOC100161826	NC_042495.1	76581107	-	6.3156e-06	0.0322809	-38.9589
acetyl-CoA acetyltransferase, cytosolic-like	NC_042493.1	131468030	+	9.98569e-07	0.0132468	-38.9773
uncharacterized LOC100167424	NC_042494.1	58013633	+	1.10258e-05	0.0417127	-38.9796
Down syndrome critical region protein 3 homolog	NC_042493.1	122207256	+	8.84586e-07	0.0125263	-38.9825
uncharacterized LOC100573731	NC_042493.1	97685597	-	1.09339e-05	0.0415876	-38.9831
N/A	NC_042493.1	4498985	+	9.6092e-06	0.0391529	-38.9891
N/A	NC_042493.1	10928703	+	1.09314e-05	0.0415876	-39.011
uncharacterized LOC100568901	NC_042493.1	106622025	-	1.0283e-05	0.0404037	-39.0233
N/A	NC_042493.1	100277761	+	1.57596e-06	0.0172493	-39.0236
LOC115033217	NC_042493.1	111485457	-	1.48021e-05	0.0471942	-39.0313
uncharacterized LOC100168472	NC_042495.1	5085218	+	1.1388e-06	0.0144012	-39.0386
high mobility group protein 20A-like	NC_042494.1	73134252	+	1.4999e-06	0.016704	-39.0541
LOC115033051	NC_042494.1	14770808	+	1.51596e-05	0.0477341	-39.0599
trafficking protein particle complex subunit 10-like	NC_042496.1	949344	+	1.16843e-05	0.042711	-39.0625
uncharacterized LOC100160715	NC_042494.1	25567475	+	1.32424e-06	0.0155926	-39.0836
N/A	NC_042493.1	120753133	-	1.87507e-06	0.0186745	-39.0909
short-chain specific acyl-CoA dehydrogenase, mitochondrial-like	NC_042496.1	36920943	+	2.23584e-06	0.0200996	-39.0909
LOC103309034	NC_042493.1	102521471	+	5.35841e-06	0.0302567	-39.1228
N/A	NW_021771101.1	1286	+	8.70976e-06	0.0374879	-39.1481
N/A	NC_042493.1	57911860	-	4.16621e-07	0.0086146	-39.151
ATP-binding cassette sub-family F member 1-like	NC_042494.1	96670190	+	3.81771e-06	0.0255175	-39.1532
uncharacterized LOC100165457	NC_042495.1	42454768	-	1.83596e-08	0.00165892	-39.1821
ferritin-like	NC_042493.1	77873033	+	1.31835e-05	0.0448915	-39.186
histone deacetylase 4-like	NC_042493.1	65001246	-	5.04135e-06	0.0292815	-39.1986
ring canal kelch homolog	NC_042495.1	23354494	+	1.3945e-05	0.0460478	-39.221
titin-like	NC_042494.1	40421453	+	3.73293e-06	0.025298	-39.223
uncharacterized LOC100168960	NC_042493.1	91938907	+	2.61634e-06	0.021719	-39.232
N/A	NC_042493.1	46574134	-	4.02075e-06	0.0260932	-39.2424
histone deacetylase 8-like	NC_042493.1	34914800	+	1.30061e-05	0.0446726	-39.2593
uncharacterized LOC100163167	NC_042494.1	78471743	+	2.21259e-06	0.020048	-39.2857
ring canal kelch homolog	NC_042494.1	113465829	+	1.57154e-05	0.0487723	-39.2991
sorting nexin-13-like	NC_042494.1	129380900	+	1.83146e-07	0.00576319	-39.3009
N/A	NC_042493.1	98199312	+	9.15649e-06	0.0383346	-39.3151
cytosolic purine 5'-nucleotidase-like	NC_042493.1	56484943	-	1.19527e-05	0.0431146	-39.3154
low-density lipoprotein receptor-related protein 1-like	NC_042494.1	3278966	+	6.21368e-06	0.0322468	-39.3241
N/A	NW_021771065.1	71563	-	8.4586e-09	0.00110317	-39.3333
# uncharacterized LOC100571978 & uncharacterized LOC107884448	NC_042493.1	113537996	+	1.20176e-09	0.000351592	-39.3443
LOC103309354	NC_042493.1	84402776	-	3.16748e-06	0.0234377	-39.3534
LOC103307818	NC_042493.1	124260704	-	5.84527e-07	0.00999596	-39.3947
N/A	NC_042495.1	103292070	+	5.38547e-06	0.0302842	-39.3981
thyroid receptor-interacting protein 6-like	NC_042493.1	130140354	-	3.14128e-06	0.0233544	-39.4011
uncharacterized LOC100572177	NC_042493.1	130067921	-	4.83974e-06	0.0286909	-39.4055
N/A	NC_042493.1	97078717	+	2.79904e-06	0.0222318	-39.4214
uncharacterized LOC100169459	NC_042493.1	36905433	+	7.26963e-06	0.0348044	-39.4218
COP9 signalosome complex subunit 4-like	NC_042493.1	94275142	+	3.97055e-06	0.0258764	-39.4258
N/A	NC_042494.1	21952440	-	2.37268e-08	0.00190252	-39.4501
histone acetyltransferase type B catalytic subunit-like	NC_042493.1	71522250	-	1.76854e-06	0.0183183	-39.4617
N/A	NC_042493.1	106511229	-	7.92402e-07	0.0117502	-39.4718
ring canal kelch homolog	NC_042494.1	169950919	+	3.59557e-06	0.0248541	-39.4796
# protein SMG7 & uncharacterized LOC115034250	NC_042495.1	46494668	+	4.74289e-07	0.00901812	-39.4872
mediator of RNA polymerase II transcription subunit 19-like	NC_042494.1	134416380	-	7.9094e-07	0.0117446	-39.4886
N/A	NC_042496.1	18753198	+	2.80305e-06	0.0222318	-39.5105
ring canal kelch protein-like	NW_021770724.1	12908	+	1.35836e-05	0.0455009	-39.5253
serine/threonine-protein phosphatase 4 regulatory subunit 1-like	NC_042495.1	71873198	-	2.37339e-06	0.0206359	-39.5285
LOC115033925	NC_042494.1	169404914	+	2.61296e-06	0.0217076	-39.5372
ran-binding protein 3-like	NC_042495.1	68719297	+	1.361e-05	0.0455097	-39.5629
N/A	NC_042493.1	65449454	+	1.56962e-05	0.0487404	-39.5681
LOC107884727	NC_042496.1	39231857	-	1.47986e-06	0.0166208	-39.5869
N/A	NW_021769929.1	15105	+	2.12439e-07	0.00611603	-39.5881
N/A	NC_042493.1	68286911	+	7.93383e-06	0.0362612	-39.5928
LOC107882406	NC_042493.1	19568676	-	5.55945e-07	0.00969089	-39.5961
uncharacterized LOC100573650	NC_042493.1	130356649	+	2.01949e-06	0.0194469	-39.599
protein brunelleschi-like	NC_042496.1	9290404	-	7.59149e-06	0.035513	-39.6154
N/A	NC_042493.1	30697725	+	3.60356e-06	0.0248618	-39.6383
uncharacterized LOC100569333	NC_042495.1	13628969	-	1.25763e-05	0.0440263	-39.6552
zinc finger protein 227-like	NC_042495.1	30168454	-	7.73342e-06	0.0358674	-39.6825
uncharacterized LOC100572540	NC_042494.1	63716024	-	5.81529e-06	0.0312251	-39.6927
N/A	NC_042494.1	127226407	-	5.81529e-06	0.0312251	-39.6927
ring canal kelch protein-like	NW_021770724.1	12500	+	1.41492e-05	0.0462974	-39.7081
RNA polymerase-associated protein CTR9 homolog	NC_042493.1	54065761	+	7.29676e-07	0.0112493	-39.7264
LOC115034945	NW_021771100.1	17615	+	1.56237e-06	0.0171526	-39.7306
N/A	NC_042494.1	76781201	+	5.61804e-06	0.03087	-39.7444
LOC103309945	NC_042493.1	87378863	+	5.7724e-06	0.0312236	-39.7534
possible pseudogene or miscRNA, No KEGG entry	NC_042493.1	30727014	-	5.97236e-07	0.0101332	-39.7664
sentrin-specific protease 1-like	NC_042493.1	129245234	-	1.22882e-06	0.0150644	-39.7709
regulator of microtubule dynamics protein 1-like	NC_042494.1	159930288	-	2.09123e-06	0.0196505	-39.7759
N/A	NC_042493.1	96076834	+	1.00585e-05	0.0399862	-39.7959
SET and MYND domain-containing protein 4-like	NC_042495.1	64430380	-	1.34546e-06	0.0157399	-39.8474
zinc finger protein 135-like	NC_042493.1	106544417	+	4.10053e-06	0.0263757	-39.8585
LOC107885907	NC_042493.1	122048292	+	1.37496e-05	0.0457117	-39.8718
N/A	NC_042493.1	115385217	-	2.90945e-06	0.0226416	-39.872
N/A	NC_042493.1	128438966	+	3.32069e-06	0.0239384	-39.881
N/A	NC_042493.1	63336266	+	1.30204e-05	0.0446874	-39.8841
LOC100166016	NC_042493.1	61819166	+	1.6588e-06	0.0178492	-39.8925
LOC103309617	NC_042494.1	137006351	-	1.51217e-06	0.0167888	-39.8933
protein unc-79 homolog	NC_042495.1	92477911	+	1.99402e-07	0.00588272	-39.899
LOC103309485	NC_042493.1	110789081	-	4.59031e-07	0.00891822	-39.9125
uncharacterized LOC100169607	NC_042493.1	104719416	-	4.57871e-06	0.0279392	-39.9189
LOC115033925	NC_042494.1	169408592	+	5.95026e-06	0.0317921	-39.9237
N/A	NC_042496.1	36872155	-	6.88388e-08	0.00313098	-39.9252
protein BCCIP homolog	NC_042495.1	16988708	+	6.05506e-06	0.0318955	-39.9267
autophagy related protein Aut1-like	NC_042493.1	42484631	-	2.99366e-06	0.0228498	-39.9275
acetyl-CoA acetyltransferase, cytosolic-like	NC_042493.1	131467977	-	8.97844e-06	0.0379262	-39.9516
N/A	NC_042493.1	97031361	+	1.2935e-06	0.0154455	-39.9543
N/A	NC_042493.1	108331678	-	9.28331e-06	0.0385634	-39.9782
N/A	NC_042493.1	97073550	-	3.30153e-06	0.0239384	-40
uncharacterized LOC100167413	NC_042494.1	20215070	+	9.44496e-06	0.038933	-40
uncharacterized LOC100572728	NW_021769929.1	9324	+	1.13364e-05	0.0422137	-40
CG3893-like	NC_042493.1	76922396	+	2.36198e-06	0.0206184	-40.024
UDP-N-acetylglucosamine--peptide N-acetylglucosaminyltransferase 110 kDa subunit-like	NC_042495.1	960067	+	1.58668e-05	0.0488777	-40.0413
LOC115033925	NC_042494.1	169404917	+	2.51712e-06	0.021391	-40.051
N/A	NC_042493.1	63336248	+	3.46788e-06	0.0243763	-40.066
N/A	NC_042494.1	1432354	+	9.70193e-07	0.0130625	-40.0757
piwi-like protein 2-like	NC_042495.1	25780996	+	1.03316e-05	0.0404164	-40.1227
e3 ubiquitin-protein ligase AMFR-like	NC_042494.1	66602054	-	8.21503e-06	0.0367288	-40.1242
ubiquitin conjugation factor E4 B-like	NC_042494.1	118790067	-	5.69074e-06	0.0310029	-40.1286
LOC107885716	NC_042493.1	109709067	-	9.98989e-06	0.0399309	-40.1361
uncharacterized LOC100573418	NC_042493.1	62749455	-	2.15521e-08	0.00181112	-40.1732
N/A	NC_042493.1	120629347	-	1.61496e-05	0.0492998	-40.1822
N/A	NC_042494.1	141668276	+	1.75542e-06	0.0183183	-40.1891
LOC107883271	NC_042493.1	100236829	+	1.61219e-05	0.0492292	-40.1935
protein phosphatase PP2A 55 kDa regulatory subunit-like	NC_042495.1	109207331	+	1.07113e-06	0.0138372	-40.1942
aspartyl-tRNA synthetase, mitochondrial (EC:6.1.1.12)	NC_042493.1	2998896	-	5.22616e-06	0.0298308	-40.2174
N/A	NC_042493.1	99775779	-	4.40221e-07	0.00879831	-40.2206
N/A	NC_042495.1	58209797	+	2.73946e-06	0.0219988	-40.2336
N/A	NC_042495.1	30028606	-	1.29618e-09	0.000354817	-40.2361
dosage compensation regulator-like	NC_042493.1	105298527	-	1.01032e-05	0.0400849	-40.2462
uncharacterized LOC100572451	NC_042494.1	164648070	+	1.57318e-06	0.0172363	-40.2477
N/A	NC_042493.1	127741181	+	3.48341e-07	0.00782313	-40.2564
LOC103308569	NC_042495.1	64163696	+	2.6015e-06	0.021679	-40.2732
N/A	NC_042494.1	78031643	-	8.40588e-06	0.0370104	-40.2802
N/A	NC_042494.1	152723523	-	1.32093e-05	0.0449653	-40.3077
coatomer subunit beta-like	NC_042494.1	18494582	-	9.87385e-06	0.0397755	-40.3127
N/A	NC_042493.1	42585110	-	2.77449e-07	0.00692017	-40.3273
schwannomin-interacting protein 1-like	NC_042493.1	76494258	+	3.95389e-06	0.0258749	-40.3279
rhomboid family member 1-like	NC_042494.1	113387397	-	4.7565e-11	7.35551e-05	-40.3509
N/A	NC_042493.1	108764469	+	3.77472e-06	0.0254127	-40.3516
N/A	NC_042495.1	63189041	-	1.66439e-05	0.0499646	-40.362
N/A	NC_042493.1	98496003	-	7.90689e-07	0.0117446	-40.3831
sodium/potassium-transporting ATPase subunit alpha-like	NC_042495.1	74109674	-	4.67235e-06	0.028177	-40.3846
deformed epidermal autoregulatory factor 1-like	NC_042493.1	106241079	-	5.80045e-07	0.00995074	-40.3875
N/A	NC_042495.1	32802533	+	1.13415e-08	0.00133446	-40.4115
lysine-specific demethylase 6A-like	NC_042494.1	90181388	-	1.37257e-05	0.0456649	-40.4167
uncharacterized LOC100168816	NC_042496.1	21733468	-	9.51771e-06	0.0390702	-40.4215
zinc finger protein 598-like	NC_042493.1	121194211	+	6.52244e-08	0.00306977	-40.4365
lanC-like protein 2-like	NC_042493.1	70810656	+	7.8084e-06	0.0360141	-40.4467
N/A	NW_021770363.1	66379	-	4.12621e-07	0.00857308	-40.454
dosage compensation regulator-like	NC_042493.1	116259601	-	3.78907e-08	0.002427	-40.4698
signal transducing adapter molecule 1-like	NC_042494.1	56446582	+	1.25919e-05	0.0440263	-40.4858
SPRY domain-containing SOCS box protein 3-like	NC_042494.1	71157094	-	6.04677e-06	0.0318862	-40.4979
cleavage stimulation factor subunit 1-like	NC_042493.1	114526598	+	7.36049e-06	0.0351307	-40.5371
# myelin regulatory factor & inhibitor of growth protein 3-like	NC_042493.1	7128764	+	8.74557e-06	0.0375674	-40.5385
structural maintenance of chromosomes protein 6-like	NC_042495.1	24085401	-	2.38502e-07	0.00638112	-40.5882
uncharacterized LOC100571424	NC_042493.1	130608125	+	1.567e-06	0.017186	-40.5986
uncharacterized LOC100161874	NC_042493.1	34631973	-	7.80214e-08	0.00338521	-40.6102
DET1- and DDB1-associated protein 1-like	NC_042495.1	28212339	+	5.06623e-06	0.0293146	-40.6429
uncharacterized LOC100573022	NC_042493.1	103447991	+	6.30622e-06	0.0322809	-40.6798
heterogeneous nuclear ribonucleoprotein L-like	NC_042493.1	76763180	-	1.07552e-05	0.0412462	-40.6907
LOC100165571	NC_042494.1	78183127	+	1.06252e-05	0.0410188	-40.7112
N/A	NC_042495.1	79101098	-	5.02002e-07	0.00919478	-40.7295
minor histocompatibility antigen H13-like	NC_042493.1	119774476	+	1.62405e-06	0.0176147	-40.7449
N/A	NC_042493.1	105725575	-	7.35627e-08	0.00329053	-40.7793
# ATP-dependent helicase brm & inositol monophosphatase 1-like	NC_042494.1	97955329	+	1.4855e-06	0.0166208	-40.8153
N/A	NC_042493.1	72447123	-	1.98768e-09	0.00043911	-40.8163
# transcription initiation factor TFIID subunit 7-like & uncharacterized LOC100169356	NC_042493.1	111383104	+	4.29593e-06	0.0269545	-40.8207
possible pseudogene or miscRNA, No KEGG entry	NW_021771488.1	553186	-	2.90325e-06	0.0226175	-40.8333
deoxynucleotidyltransferase, terminal, interacting protein 2	NC_042495.1	48258960	+	2.16804e-06	0.0199605	-40.9091
N/A	NC_042493.1	111231087	+	1.67204e-06	0.0179382	-40.9202
integrin beta-PS-like	NC_042494.1	97773407	-	3.07863e-06	0.0231177	-40.9239
LOC103308877	NC_042493.1	41975353	+	1.50058e-05	0.0475266	-40.9254
N/A	NC_042493.1	61848300	+	7.85962e-06	0.0360978	-40.9314
N/A	NC_042493.1	120971530	+	3.25281e-07	0.00750774	-40.9377
LOC107884178	NC_042493.1	106647832	-	3.53354e-06	0.0246335	-40.9542
N/A	NC_042493.1	106149214	+	1.0121e-06	0.0133121	-40.9814
N/A	NC_042496.1	20704564	-	1.08099e-05	0.0413338	-40.9826
e3 ubiquitin-protein ligase HECW2-like	NC_042494.1	106681197	-	1.25179e-06	0.0151999	-41.0053
sulfhydryl oxidase 1-like	NC_042495.1	72304746	-	9.49759e-07	0.0129159	-41.0256
N/A	NC_042493.1	131339592	-	8.45866e-06	0.0370405	-41.0631
uncharacterized LOC100570947	NC_042495.1	76287071	-	3.9911e-06	0.0259947	-41.0714
segment polarity protein dishevelled homolog DVL-3-like	NC_042495.1	51115259	+	2.76131e-06	0.0220666	-41.0909
LOC107884652	NC_042496.1	28405789	+	1.41805e-05	0.0463038	-41.101
uncharacterized LOC100160811	NC_042494.1	152707963	+	1.2444e-05	0.0439002	-41.1111
N/A	NC_042494.1	86208610	-	8.34585e-06	0.0369888	-41.129
dynamin-1-like protein-like	NC_042493.1	8394038	-	8.42252e-06	0.037018	-41.1321
N/A	NC_042493.1	120774892	+	9.08857e-07	0.0126395	-41.1443
N/A	NC_042493.1	99760071	-	1.38573e-06	0.0160865	-41.1859
putative methyltransferase 235L-like	NC_042496.1	10832120	-	1.40887e-06	0.0162416	-41.2278
ubiquitin carboxyl-terminal hydrolase 3-like	NC_042495.1	74629221	-	3.72642e-06	0.0252752	-41.2292
probable queuine tRNA-ribosyltransferase-like	NC_042494.1	145203072	-	1.43965e-06	0.016437	-41.25
N/A	NW_021770339.1	8358	-	1.42451e-05	0.0464182	-41.266
LOC100169142	NC_042494.1	112689169	-	6.58401e-06	0.0330044	-41.2704
LOC107884605	NC_042493.1	96025329	-	3.42058e-06	0.0242009	-41.2732
N/A	NC_042495.1	32760115	-	1.85305e-06	0.0185389	-41.328
LOC115035039	NC_042493.1	120698076	-	1.13369e-09	0.000340889	-41.3651
possible pseudogene or miscRNA, No KEGG entry	NC_042493.1	11451336	-	8.47708e-06	0.0370643	-41.3754
uncharacterized LOC100168156	NC_042495.1	639280	+	2.26727e-06	0.0202405	-41.381
cystinosin homolog	NC_042495.1	6055603	+	4.49294e-07	0.00882678	-41.3832
LOC115034734	NW_021770341.1	51013	-	4.49294e-07	0.00882678	-41.3832
LOC107883288	NW_021770462.1	9821	+	2.42312e-06	0.0209171	-41.3949
4-coumarate--CoA ligase 3-like	NC_042494.1	160222179	+	5.00787e-08	0.00268364	-41.4286
N/A	NC_042493.1	129749958	+	1.47855e-07	0.0050016	-41.4374
transmembrane protein 55B-like	NC_042493.1	84931755	+	1.99983e-06	0.0193738	-41.453
N/A	NC_042493.1	47293872	-	1.69614e-06	0.0180891	-41.4815
sugar transporter SWEET1-like	NC_042493.1	15235947	-	2.93106e-06	0.0227281	-41.4861
zinc finger protein 808-like	NC_042494.1	22024942	+	9.18248e-06	0.0383346	-41.4894
mitotic spindle assembly checkpoint protein MAD1-like	NC_042494.1	140252998	+	1.65677e-06	0.0178451	-41.4894
LOC103310016	NC_042493.1	93019449	-	8.69822e-06	0.0374532	-41.5197
protein king tubby-like	NC_042494.1	44328137	+	6.6646e-07	0.0108814	-41.5254
N/A	NC_042493.1	122146295	-	3.44476e-07	0.00778478	-41.5489
uncharacterized LOC100572364	NC_042493.1	65507226	-	1.03315e-07	0.00402292	-41.5493
cadherin-87A-like	NC_042495.1	1578152	-	1.14461e-05	0.0424616	-41.5535
protein furry-like	NC_042494.1	165823962	+	5.34817e-06	0.0302567	-41.5556
N/A	NC_042494.1	102798365	+	1.62713e-05	0.0494617	-41.5635
N/A	NC_042493.1	131063176	+	5.9916e-06	0.0318589	-41.5745
mediator of RNA polymerase II transcription subunit 14-like	NC_042494.1	122608824	-	5.48513e-06	0.0305586	-41.5751
uncharacterized LOC100160798	NC_042494.1	69175457	-	2.17827e-07	0.0062215	-41.5761
attractin-like protein 1-like	NC_042496.1	22890126	+	6.91235e-07	0.0110362	-41.578
Williams-Beuren syndrome chromosomal region 16 protein homolog	NC_042495.1	75661437	-	6.28152e-06	0.0322809	-41.5896
N/A	NC_042493.1	106984093	-	3.47896e-07	0.00782313	-41.629
general transcription factor 3C polypeptide 1-like	NC_042495.1	110868095	+	7.22061e-07	0.0112314	-41.6297
N/A	NC_042495.1	20895427	-	1.59566e-05	0.0489849	-41.6484
endoplasmic reticulum-Golgi intermediate compartment protein 2-like	NC_042493.1	25209838	+	9.33586e-06	0.0387314	-41.6608
dnaJ homolog subfamily C member 17-like	NC_042493.1	95872896	-	1.84829e-06	0.0185115	-41.6625
N/A	NC_042493.1	105222537	+	2.99467e-06	0.0228498	-41.6667
probable RNA-binding protein orb2-like	NC_042494.1	29035906	+	4.2941e-06	0.0269545	-41.6667
UPF0493 protein AAEL009648-like	NC_042494.1	149482842	+	2.10027e-10	0.000169405	-41.6667
possible pseudogene or miscRNA, No KEGG entry	NC_042493.1	72383099	+	9.68503e-07	0.0130625	-41.6744
N/A	NC_042495.1	63189053	-	5.57361e-08	0.00280622	-41.6813
1-phosphatidylinositol-3-phosphate 5-kinase-like	NC_042494.1	152434411	+	3.42555e-06	0.0242184	-41.7488
# transmembrane 9 superfamily member 2 & uncharacterized LOC107884431	NC_042493.1	87500241	+	1.20456e-06	0.0149371	-41.8033
LOC107883785	NC_042494.1	21783120	+	1.29506e-05	0.044666	-41.8195
uncharacterized LOC100161626	NC_042494.1	18262680	+	6.91631e-06	0.0338617	-41.8215
N/A	NC_042495.1	65426939	-	1.87592e-06	0.0186745	-41.8367
possible pseudogene or miscRNA, No KEGG entry	NW_021771488.1	556497	-	1.2009e-06	0.0149371	-41.8475
lysosomal-trafficking regulator-like	NC_042494.1	157986698	+	6.04072e-06	0.0318862	-41.8478
uncharacterized LOC100165888	NC_042495.1	49398959	-	9.51685e-06	0.0390702	-41.8478
uncharacterized LOC100160802	NC_042495.1	8685473	+	1.77066e-06	0.0183183	-41.869
chromobox protein homolog 5-like	NC_042493.1	120607573	+	7.13946e-06	0.0344556	-41.9173
serine/threonine-protein kinase SMG1-like	NC_042494.1	140357508	-	6.31742e-06	0.0322809	-41.9294
N/A	NC_042496.1	39540872	+	4.11165e-06	0.0263757	-41.9298
sphingosine-1-phosphate phosphatase 2-like	NC_042495.1	84874755	-	9.13213e-06	0.0383007	-41.9643
uncharacterized LOC100160165	NC_042493.1	42659434	-	1.81065e-06	0.018447	-41.9873
ACYPI53115	NC_042495.1	75666929	-	2.40313e-07	0.00639491	-42
LOC107884691	NC_042495.1	21171817	-	1.48711e-05	0.0472701	-42.0031
N/A	NC_042493.1	114989838	+	4.31877e-06	0.026992	-42.0106
uncharacterized LOC100574257	NC_042493.1	80604042	-	8.27606e-06	0.0368646	-42.0497
TBC1 domain family member 22B-like	NC_042493.1	64884125	-	2.47162e-06	0.0211552	-42.0635
N/A	NC_042493.1	119110146	-	4.27177e-07	0.00870597	-42.0814
N/A	NC_042495.1	112158253	-	1.2091e-06	0.0149581	-42.0823
LOC115033385	NC_042493.1	120617092	+	1.43046e-05	0.0465292	-42.101
N/A	NW_021770979.1	194792	-	1.03687e-06	0.0135335	-42.1159
dynein heavy chain, cytoplasmic-like	NC_042494.1	19324613	+	1.22146e-06	0.0150251	-42.124
heparan-alpha-glucosaminide N-acetyltransferase-like	NC_042495.1	65335953	-	1.16934e-05	0.042711	-42.1368
# uncharacterized LOC100571978 & uncharacterized LOC107884448	NC_042493.1	113537988	+	9.16593e-07	0.012688	-42.1375
# UQCR11 & cytoplasmic tRNA 2-thiolation protein 2-B	NC_042494.1	53650204	-	1.41666e-05	0.0463018	-42.1624
# voltage-dependent T-type calcium channel subunit alpha-1H & uncharacterized LOC100568729	NC_042494.1	127009820	+	7.73352e-06	0.0358674	-42.1733
N/A	NC_042493.1	131028764	-	3.94293e-07	0.00830384	-42.2308
N/A	NC_042493.1	120971482	+	1.09273e-08	0.00129986	-42.2449
uncharacterized LOC100568751	NC_042493.1	121593394	+	1.02294e-05	0.0402953	-42.2492
transcriptional adapter 3-A-like	NC_042493.1	2978141	-	5.37664e-06	0.0302595	-42.2642
LOC115034470	NC_042493.1	96471605	-	5.63078e-06	0.0308777	-42.2708
ring canal kelch homolog	NC_042494.1	169950500	-	8.66984e-07	0.012365	-42.2847
GTP-binding protein SAR1b-like	NC_042494.1	53521341	-	3.32481e-07	0.00759297	-42.2958
N/A	NC_042494.1	21952368	-	4.92666e-07	0.00913544	-42.298
uncharacterized LOC100569937	NC_042495.1	21313811	-	4.72902e-06	0.0282823	-42.3077
N/A	NC_042493.1	120828289	-	1.78443e-06	0.0183615	-42.3261
ester hydrolase C11orf54 homolog	NC_042495.1	8616890	+	1.8486e-06	0.0185115	-42.3319
LOC115034642	NC_042493.1	105730900	-	6.80625e-07	0.0109828	-42.3333
DNA-directed RNA polymerase III subunit RPC10-like	NC_042496.1	1783183	+	3.11647e-06	0.0232178	-42.3333
LOC107885032	NC_042496.1	38635402	-	6.12984e-06	0.0320415	-42.3378
N/A	NC_042496.1	28302617	+	6.08349e-06	0.0319365	-42.3403
methionine aminopeptidase 1-like	NC_042494.1	69001605	-	4.71562e-07	0.00901812	-42.3492
N/A	NC_042495.1	20888732	-	4.11295e-06	0.0263757	-42.3497
N/A	NC_042495.1	2941395	-	6.10395e-06	0.0319664	-42.3571
protein fem-1 homolog CG6966-like	NC_042494.1	49104207	-	8.29202e-06	0.036908	-42.3669
uncharacterized LOC100160291	NC_042495.1	63370905	+	6.99755e-07	0.0110709	-42.3707
zinc finger protein 84-like	NC_042494.1	116279745	-	1.05046e-06	0.0136507	-42.3947
uncharacterized LOC100575814	NC_042493.1	84006592	+	4.248e-06	0.0267978	-42.4812
LOC100144776	NC_042493.1	11583403	+	2.62528e-06	0.0217475	-42.4984
g2/M phase-specific E3 ubiquitin-protein ligase-like	NC_042493.1	131975884	-	9.35863e-06	0.0387507	-42.5106
RING finger protein 121-like	NC_042496.1	31689369	-	9.38978e-06	0.03881	-42.517
exostosin-3-like	NC_042494.1	26217714	+	1.384e-06	0.0160865	-42.549
afadin-like	NC_042494.1	89345719	+	7.56452e-06	0.0354634	-42.5532
autophagy related protein Aut1-like	NC_042493.1	42486234	+	2.27723e-07	0.0063533	-42.5549
uncharacterized LOC100568595	NC_042494.1	18689092	+	9.65301e-06	0.0392191	-42.5794
N/A	NC_042493.1	120752826	+	1.5819e-05	0.0488777	-42.5926
LOC107885906	NC_042493.1	122040271	+	1.52739e-05	0.0479948	-42.5926
thyroid receptor-interacting protein 6-like	NC_042493.1	130140346	-	3.33336e-06	0.0240074	-42.598
N/A	NC_042493.1	119037216	-	2.62715e-06	0.0217475	-42.6573
LOC107885765	NW_021761825.1	831	+	2.44141e-07	0.00644584	-42.6781
N/A	NC_042493.1	131436917	+	1.10822e-05	0.0417846	-42.6829
bifunctional aminoacyl-tRNA synthetase-like	NC_042493.1	28407951	-	5.32813e-10	0.000216098	-42.6856
protein-L-isoaspartate O-methyltransferase domain-containing protein 2-like	NC_042493.1	112996079	-	6.13164e-07	0.0102939	-42.6923
N/A	NC_042494.1	106855664	+	1.12779e-06	0.014312	-42.6923
uncharacterized LOC100571833	NC_042493.1	122154266	+	1.50834e-05	0.0475976	-42.7234
possible pseudogene or miscRNA, No KEGG entry	NW_021770363.1	91763	+	6.43421e-06	0.0325617	-42.7438
protein downstream neighbor of son homolog	NC_042494.1	116698359	+	7.21401e-06	0.0346462	-42.7619
N/A	NW_021771344.1	12107	+	6.1648e-06	0.0320781	-42.7714
LOC115033346	NC_042493.1	100606242	+	2.26894e-06	0.0202405	-42.7902
protein kinase C zeta type-like	NC_042493.1	92975867	-	1.58742e-06	0.0173222	-42.807
uncharacterized LOC100167340	NC_042494.1	78232723	+	4.88977e-07	0.00913359	-42.8571
UDP-glucuronosyltransferase 2B20-like	NC_042494.1	136907117	-	4.48763e-06	0.0276483	-42.8922
uncharacterized LOC100571463	NC_042493.1	15918435	+	2.54732e-06	0.0214754	-42.902
uncharacterized LOC100569092	NC_042495.1	101426044	+	1.08543e-05	0.0413868	-42.9144
N/A	NC_042493.1	119442712	-	6.88482e-07	0.0110085	-42.9776
LOC107882406	NC_042493.1	19582541	+	1.56799e-05	0.0487179	-42.9878
structural maintenance of chromosomes protein 5-like	NC_042494.1	117002110	-	1.92866e-08	0.00170125	-42.9996
LOC115034191	NC_042495.1	32810481	-	3.66338e-06	0.0250832	-43.0011
dynamin-like 120 kDa protein, mitochondrial-like	NC_042495.1	42408353	+	1.07087e-05	0.0411943	-43.0147
N/A	NC_042493.1	126486419	+	8.40107e-09	0.00110317	-43.0176
N/A	NC_042493.1	126045222	+	5.20453e-06	0.0297614	-43.0233
N/A	NC_042493.1	126045201	+	1.77854e-06	0.0183183	-43.0612
N/A	NC_042494.1	108115509	+	3.33723e-06	0.0240194	-43.0672
LOC103309178	NC_042494.1	141238413	+	8.93802e-06	0.037883	-43.0751
N/A	NC_042495.1	81478914	-	7.37755e-07	0.0113118	-43.097
uncharacterized LOC100571084	NC_042494.1	152576818	-	3.39203e-06	0.0241563	-43.1213
N/A	NC_042496.1	42247575	-	2.42028e-06	0.0209092	-43.1515
N/A	NC_042493.1	96473086	-	7.09613e-07	0.0111649	-43.1818
N/A	NC_042496.1	36825518	+	4.33782e-06	0.0270486	-43.2124
LOC115033147	NC_042493.1	67938006	+	4.94473e-07	0.00913544	-43.2258
N/A	NC_042495.1	78691913	+	5.57324e-07	0.0096916	-43.267
CTL-like protein 1-like	NC_042496.1	36372411	+	3.66346e-06	0.0250832	-43.2719
N/A	NC_042495.1	48047318	-	1.2707e-06	0.0153176	-43.2868
N/A	NC_042493.1	89873148	-	5.93932e-07	0.010093	-43.2941
zinc transporter 9-like	NC_042494.1	78961718	+	4.66077e-09	0.000741945	-43.324
eukaryotic translation initiation factor 4 gamma, 3-like	NC_042495.1	8340829	-	5.60912e-06	0.0308517	-43.3247
LOC107882406	NC_042493.1	19569273	-	9.51133e-06	0.0390702	-43.3493
N/A	NC_042493.1	69561326	+	1.13412e-05	0.0422169	-43.3636
prolow-density lipoprotein receptor-related protein 1-like	NC_042494.1	153557557	+	4.8938e-07	0.00913359	-43.3789
uncharacterized LOC100570253	NC_042496.1	22125597	+	1.57345e-09	0.000384856	-43.3865
uncharacterized LOC100574674	NC_042493.1	110774184	+	1.47374e-05	0.0470591	-43.3953
N/A	NC_042494.1	169428143	-	3.24433e-06	0.0237615	-43.4066
uncharacterized LOC100575022	NC_042493.1	21481971	-	1.74242e-06	0.0182413	-43.4081
N/A	NC_042493.1	100934673	-	6.60299e-06	0.0330604	-43.4265
LOC115033196	NC_042493.1	103142555	-	1.02739e-06	0.0134626	-43.4392
glycerol-3-phosphate dehydrogenase, mitochondrial-like	NC_042493.1	125512756	+	5.6118e-06	0.0308517	-43.4473
LOC103308647	NC_042496.1	41954712	+	5.37334e-06	0.0302595	-43.4473
uncharacterized LOC100573795	NC_042493.1	101359636	+	6.09733e-06	0.0319664	-43.4524
N/A	NC_042493.1	107584125	-	8.54231e-07	0.0122692	-43.4524
LOC100144776	NC_042493.1	11585541	-	6.38011e-07	0.0105441	-43.4687
mothers against decapentaplegic homolog 4-like	NC_042493.1	124307994	+	1.92737e-06	0.018881	-43.4848
N/A	NC_042495.1	63215116	-	9.34748e-08	0.00380396	-43.5169
LOC107885113	NC_042493.1	100337283	-	1.31291e-05	0.0448915	-43.531
LOC115035136	NC_042493.1	131221384	-	2.20386e-06	0.0200475	-43.5354
uncharacterized LOC100571110	NC_042496.1	39996142	-	1.75216e-06	0.0183078	-43.544
autophagy-related protein 2 homolog B-like	NC_042494.1	14224314	+	9.18313e-06	0.0383346	-43.5562
run domain Beclin-1 interacting and cystein-rich containing protein-like	NC_042493.1	88901965	+	7.2501e-07	0.0112493	-43.56
N/A	NC_042493.1	132180897	+	1.60221e-06	0.0174584	-43.5636
arrestin domain-containing protein 3-like	NC_042494.1	134574343	+	3.30462e-06	0.0239384	-43.5847
uncharacterized LOC100572451	NC_042494.1	164647137	+	8.16273e-06	0.0366137	-43.5897
uncharacterized LOC100573606	NW_021770820.1	74175	+	1.85e-07	0.00578831	-43.6111
uncharacterized LOC100160130	NC_042494.1	47442953	+	9.00175e-07	0.0125895	-43.617
LOC103309118	NC_042493.1	80485828	-	3.90302e-07	0.00826804	-43.6647
LOC107883214	NC_042493.1	108030593	+	5.6021e-07	0.00970273	-43.672
transcriptional adapter 3-A-like	NC_042493.1	2977222	+	1.63594e-06	0.0176912	-43.6819
UDP-N-acetylglucosamine--peptide N-acetylglucosaminyltransferase 110 kDa subunit-like	NC_042494.1	169966101	+	3.66288e-06	0.0250832	-43.7246
NFX1-type zinc finger-containing protein 1-like	NC_042493.1	56242854	+	2.21686e-06	0.020048	-43.7761
N/A	NC_042493.1	67679695	+	6.94266e-06	0.03396	-43.7879
ATP-binding cassette sub-family G member 4-like	NC_042494.1	138038383	-	1.83024e-06	0.018447	-43.808
metal transporter CNNM2-like	NC_042493.1	91489199	-	1.30077e-06	0.0154455	-43.8259
probable serine hydrolase-like	NC_042495.1	102838530	-	9.15966e-06	0.0383346	-43.8483
uncharacterized LOC100167279	NC_042494.1	141696323	+	5.29598e-07	0.00941352	-43.8503
ATP-dependent RNA helicase A-like	NC_042495.1	36844116	+	2.75187e-06	0.0220432	-43.8552
uncharacterized LOC100569364	NC_042493.1	108451941	+	4.87037e-06	0.0287152	-43.8596
uncharacterized LOC100575167	NC_042494.1	169997269	-	1.87852e-06	0.0186745	-43.8636
carnitine O-palmitoyltransferase 2, mitochondrial-like	NC_042493.1	32566472	-	3.96395e-07	0.00831576	-43.8746
uncharacterized LOC100167196	NC_042494.1	123159169	-	7.0147e-06	0.0341427	-43.9276
N/A	NC_042493.1	87655362	-	3.01491e-07	0.00718857	-43.9467
N/A	NC_042493.1	98427135	-	1.82082e-08	0.00165892	-43.9609
N/A	NC_042493.1	81811741	-	1.40563e-06	0.0162215	-43.9693
LOC107884788	NC_042493.1	130663307	+	4.2428e-06	0.0267957	-43.9966
protein Hook homolog 3-like	NC_042493.1	77905758	-	1.03e-06	0.0134658	-44
LOC103309684	NC_042493.1	132132726	-	1.98023e-08	0.00170125	-44
cyclic AMP-dependent transcription factor ATF-4-like	NC_042494.1	106609288	-	1.65159e-07	0.00543413	-44
LOC115033196	NC_042493.1	103142533	-	3.40849e-06	0.0241563	-44.0283
kinesin-like protein KIF21A-like	NC_042495.1	79935045	-	1.26421e-05	0.0440883	-44.0407
uncharacterized LOC100573606	NW_021770820.1	74434	+	1.91273e-07	0.00583241	-44.0437
# alpha-ketoglutarate-dependent dioxygenase alkB homolog 4 & DNA helicase MCM8-like	NC_042494.1	108760068	+	1.28783e-07	0.0046161	-44.0476
N/A	NW_021775216.1	496	+	6.77982e-09	0.000940907	-44.0789
N/A	NC_042493.1	107920973	+	5.70173e-08	0.00284427	-44.0809
uncharacterized LOC100162526	NC_042495.1	43418957	+	7.10328e-06	0.0343572	-44.0823
e3 ubiquitin-protein ligase synoviolin-like	NC_042493.1	84979888	-	6.01336e-07	0.0101868	-44.1799
u1 small nuclear ribonucleoprotein 70 kDa-like	NC_042493.1	104478800	+	2.87478e-08	0.00214416	-44.186
LOC103309313	NC_042493.1	34751058	-	9.71141e-08	0.00389351	-44.2045
leucine-rich repeat-containing protein 48-like	NC_042493.1	42635244	+	2.94513e-06	0.0227962	-44.2123
# legumain & uncharacterized LOC100570989	NC_042493.1	4065490	+	3.01491e-07	0.00718857	-44.2251
N/A	NC_042493.1	104215105	+	4.26313e-08	0.00248852	-44.2308
LOC107882242	NC_042495.1	22052734	-	2.87848e-06	0.0224976	-44.2454
N/A	NC_042494.1	48049460	-	7.42443e-06	0.0352185	-44.2509
signal peptidase complex catalytic subunit SEC11C-like	NC_042493.1	94284987	-	9.87436e-07	0.0131843	-44.2727
LOC107884544	NC_042495.1	102028587	-	6.79517e-07	0.0109828	-44.2755
LOC107884047	NC_042496.1	37128501	+	1.64829e-07	0.00543413	-44.3047
LOC107882242	NC_042495.1	22052727	-	6.82446e-08	0.00313098	-44.3117
protein LSM14 homolog A-like	NC_042494.1	108829727	+	2.46622e-06	0.0211374	-44.3413
uncharacterized LOC100575861	NC_042493.1	104827055	+	2.45974e-08	0.00194353	-44.3723
# legumain & putative uncharacterized protein DDB_G0282499	NC_042493.1	3996493	-	2.47221e-06	0.0211552	-44.3994
LOC103308263	NC_042493.1	105715715	+	2.577e-06	0.0215457	-44.4145
[truncated: 244 more rows]

## Sheet: DiffCpG_4vY_25p
Gene Name	chr	DMS	strand	pvalue	qvalue	meth.diff
DNA2-like helicase-like	NC_042494.1	56332991	-	3.08023e-10	0.000194187	61.8012
coatomer subunit epsilon-like	NC_042495.1	4540480	-	1.62614e-08	0.00245166	60.4859
N/A	NC_042496.1	24333894	-	1.47721e-10	0.000109871	57.5758
N/A	NC_042493.1	131062995	+	4.85639e-11	7.19431e-05	56.6536
N/A	NC_042494.1	89857044	-	1.03014e-09	0.000461418	54.6485
derlin-2-like	NC_042495.1	76735041	-	1.03396e-09	0.000461418	54.4877
cytosolic 5'-nucleotidase III-like protein-like	NC_042493.1	6270635	-	8.80688e-09	0.00169405	54.1667
coiled-coil domain containing 130	NC_042495.1	43718452	+	6.1868e-11	7.19431e-05	54.0541
N/A	NC_042494.1	50771645	+	1.04936e-06	0.0190839	53.6842
lesswright	NC_042496.1	16680337	-	1.27051e-09	0.000506234	53.5409
titin-like	NC_042494.1	40422244	+	1.18762e-08	0.00197758	53.4965
N/A	NC_042493.1	69198859	+	3.22787e-06	0.0325312	53.3613
N/A	NC_042493.1	88451019	+	1.07538e-07	0.00639956	52.8986
ring canal kelch protein-like	NW_021771438.1	40571	-	4.34258e-07	0.013605	52.8409
N/A	NW_021769929.1	15105	+	8.06926e-11	7.19431e-05	52.6282
N/A	NW_021770278.1	682	-	5.71417e-08	0.00468755	52.1142
elongation factor Tu, mitochondrial-like	NC_042495.1	43625760	+	1.85292e-08	0.00261675	51.8217
membrane steroid binding protein	NC_042493.1	74806844	+	5.63397e-07	0.0152563	51.7949
DNA repair protein XRCC1-like	NC_042494.1	161357210	-	4.42434e-07	0.013605	51.3056
uncharacterized LOC100572451	NC_042494.1	164654080	+	4.48049e-09	0.00111082	51.2216
LOC107882364	NW_021770374.1	1380944	+	3.61456e-09	0.00100815	50.5401
N/A	NC_042494.1	158252568	-	3.03624e-07	0.0117252	50.3373
# legumain & armadillo-like helical domain-containing protein 3	NC_042493.1	4043171	+	3.15545e-09	0.000926423	50.2304
uncharacterized LOC100166017	NC_042495.1	61409355	-	5.98421e-09	0.00136252	50.198
N/A	NC_042493.1	86091745	-	2.94859e-07	0.0115119	50.1807
LOC107884620	NC_042496.1	33771357	-	3.12785e-06	0.0321032	50.0585
26S proteasome non-ATPase regulatory subunit 1-like	NC_042494.1	1416804	+	1.38372e-08	0.00218077	50
mitochondrial carrier triple repeat protein 1-like	NC_042495.1	12965157	-	2.49154e-07	0.0106096	50
dynamin-1-like protein-like	NC_042493.1	8394038	-	3.99986e-08	0.00392464	49.9845
N/A	NC_042493.1	71537812	+	8.43132e-08	0.00566656	49.966
uncharacterized protein C6orf106-like	NC_042494.1	153711729	-	4.2536e-09	0.00107854	49.9656
dedicator of cytokinesis protein 7-like	NC_042493.1	79767637	-	1.27247e-07	0.00713391	49.7845
N/A	NC_042495.1	559996	-	1.93469e-06	0.0259896	49.5676
uncharacterized LOC100163212	NC_042495.1	111172762	+	6.03282e-08	0.00470671	49.5423
ftsJ methyltransferase domain-containing protein 1-like	NC_042495.1	89733290	+	3.45051e-07	0.0124959	49.1745
zinc finger protein 184-like	NC_042494.1	12374353	-	1.12877e-08	0.0019677	49.0096
agrin-like	NC_042496.1	27574184	+	2.45257e-07	0.010524	48.413
uncharacterized LOC100163695	NC_042495.1	103437121	-	6.49397e-11	7.19431e-05	48.3051
N/A	NC_042495.1	94275265	-	1.19739e-06	0.0203744	48.2742
possible pseudogene or miscRNA, No KEGG entry	NC_042493.1	80622189	-	3.79758e-07	0.0129963	48.2698
N/A	NC_042495.1	83901209	-	4.46522e-06	0.0375057	48.062
zinc finger protein 616-like	NC_042495.1	90223325	+	3.71951e-08	0.00384185	47.8537
DNA excision repair protein ERCC-8-like	NC_042493.1	81915479	-	7.11771e-06	0.047437	47.8162
N/A	NC_042493.1	89873148	-	4.67549e-09	0.00113397	47.7436
uncharacterized LOC100160540	NC_042496.1	7641369	+	2.08582e-08	0.00273572	47.577
N/A	NC_042496.1	36825518	+	4.62737e-07	0.0140287	47.5751
N/A	NC_042494.1	67242601	-	1.25985e-07	0.00713391	47.322
inorganic pyrophosphatase-like	NC_042496.1	23736457	-	5.55635e-08	0.00462612	47.2862
uncharacterized LOC100167706	NC_042494.1	59752551	+	3.1173e-06	0.0321032	47.2351
f-box only protein 11-like	NC_042494.1	61495091	-	2.48826e-08	0.00301745	47.2015
cohesin subunit SA-1-like	NC_042495.1	77947228	+	1.36998e-06	0.0218973	47.1651
uncharacterized LOC100159948	NC_042495.1	102458652	-	4.87464e-07	0.0144058	47.0238
N/A	NC_042495.1	23993789	-	6.20557e-07	0.0156307	46.9697
LOC107883076	NC_042493.1	95311312	-	3.4404e-06	0.0335605	46.9298
LOC100160819	NC_042495.1	75585259	-	2.0082e-08	0.00273228	46.8091
probable ATP-dependent RNA helicase DDX11-like	NC_042493.1	70335638	-	3.766e-06	0.0350693	46.8027
N/A	NC_042496.1	28302617	+	2.83233e-06	0.0306789	46.7094
uncharacterized LOC100168934	NC_042494.1	92714448	+	4.3747e-06	0.0373102	46.6783
CG4239-like	NC_042494.1	45386514	-	5.02753e-07	0.0145231	46.6667
ribonuclease Z, mitochondrial-like	NC_042494.1	97046149	+	1.67203e-08	0.00248722	46.4516
zinc finger protein 569-like	NC_042494.1	17455371	+	3.39212e-08	0.0036389	46.2963
uncharacterized LOC100163696	NC_042495.1	51614860	-	1.71927e-08	0.00252385	46.2963
uncharacterized LOC100159344	NC_042495.1	8612426	+	8.60364e-07	0.0175914	46.2559
uncharacterized LOC100166462	NC_042494.1	108804580	-	3.72055e-07	0.0128113	46.2121
# farnesol dehydrogenase-like & kinesin-like protein unc-104	NC_042494.1	42285250	-	1.80566e-06	0.025111	46.2062
uncharacterized LOC100570013	NC_042496.1	2287843	+	7.77721e-09	0.00154145	46.1649
N/A	NC_042493.1	47138737	-	4.06393e-06	0.0362421	46.1012
LOC107882542	NC_042493.1	8815536	+	7.54492e-07	0.0169442	46.0784
tyrosine-protein phosphatase 99A-like	NC_042493.1	47946502	+	7.39356e-09	0.00154067	46
SPARC-related modular calcium-binding protein 2-like	NC_042495.1	50400060	+	6.82251e-06	0.0463319	45.9384
protocadherin-like wing polarity protein stan-like	NC_042495.1	63838915	+	1.02156e-06	0.0188399	45.814
protein Wnt-11b-like	NC_042494.1	55889847	+	1.90009e-06	0.0256461	45.7514
hexokinase type 2-like	NC_042494.1	15267582	-	6.31634e-06	0.044763	45.7328
long-chain-fatty-acid--CoA ligase ACSBG2-like	NC_042494.1	142072664	+	1.03206e-08	0.00188758	45.6948
uncharacterized LOC100169432	NC_042495.1	108380192	-	1.56685e-06	0.0232148	45.4132
ral GTPase-activating protein subunit alpha-1-like	NC_042493.1	56435372	-	2.38874e-06	0.0286253	45.3061
uncharacterized LOC100164863	NC_042494.1	55031427	+	5.80862e-08	0.00469598	45.3027
exocyst complex component 2-like	NC_042494.1	2134965	-	1.08191e-06	0.0192914	45.2978
N/A	NC_042493.1	76071689	-	1.40815e-08	0.00218197	45.231
N/A	NC_042495.1	86127361	+	2.13333e-08	0.00273572	45.2255
N/A	NC_042494.1	106855558	+	9.63189e-07	0.0185611	45.172
ribonucleoside-diphosphate reductase large subunit-like	NC_042494.1	32118812	-	3.4413e-06	0.0335605	45.1681
peroxisome biogenesis factor 2-like	NC_042494.1	109099889	-	3.00608e-06	0.0317291	45.0909
protein sprint-like	NC_042496.1	20992572	+	3.89483e-10	0.0002287	45.0501
LOC107884925	NC_042494.1	34607771	-	1.0107e-07	0.00619561	45
ATP-dependent RNA helicase DHX8-like	NC_042495.1	38641514	-	6.45082e-06	0.0451432	44.9454
uncharacterized LOC100569654	NC_042493.1	16492604	-	4.40449e-07	0.013605	44.9328
proton-coupled folate transporter-like	NC_042493.1	125605416	-	3.94896e-06	0.0357173	44.9318
peroxisomal N(1)-acetyl-spermine/spermidine oxidase-like	NC_042494.1	158322206	-	2.18137e-07	0.0097347	44.895
glycerol kinase-like	NC_042493.1	122116090	-	1.08413e-07	0.00639956	44.6784
tyrosine-protein phosphatase Lar-like	NC_042495.1	4870933	+	3.73329e-06	0.0350007	44.525
eukaryotic translation initiation factor 4E-1B-like	NC_042493.1	60313187	+	5.05643e-06	0.0400636	44.4444
calcium-independent protein kinase C-like	NC_042493.1	57760555	-	2.49051e-06	0.0291775	44.3656
uncharacterized LOC100158681	NC_042493.1	56396810	+	1.55102e-06	0.023177	44.3452
[truncated: 1,079 more rows]

## Sheet: DiffCpG_1vRest_25p
LOC	Gene Name	chr	DMS	strand	pvalue	qvalue	meth.diff
[truncated: 1,841 more rows]

## Sheet: DiffCpG_2vRest_25p
LOC	Gene Name	chr	DMS	strand	pvalue	qvalue	meth.diff
[truncated: 644 more rows]

[truncated: 3 more sheets: DiffCpG_3vRest_25p, DiffCpG_4vRest_25p, DiffCpG_YAvRest_25p]
